# Supplementary material for: A transcriptomic atlas of Aedes aegypti reveals detailed functional organization of major body parts and gut regional specializations in sugar-fed and blood-fed adult females
Source: eLife. 2022 Apr 26;11:e76132. doi: 10.7554/eLife.76132 (PMC9113746; doi:10.7554/eLife.76132)
Supplement: Supplementary file 1. [file elife-76132-supp1.xlsx]

## Sheet: Marker Count
Note: All markers are expressed no less than 5 TPM in selected body part, and enriched at least 50x compared to all other body parts
Body Part	# of Markers
Head	79
Thorax	26
Abdomen	8
Gut	65
MTs	70
Ovaries	391

## Sheet: Head
GeneID	Description	TPM
		Head	Thorax	Abdomen	Ovaries	MTs	Gut
AAEL000669	uncharacterized LOC5565425	16.9432	0	0	0	0	0
AAEL008012	pheromone-binding protein-related protein 6	8.01943	0	0	0	0	0
AAEL011416	general odorant-binding protein 71	17.6516	0	0	0	0	0
AAEL013018	general odorant-binding protein 83a	175.759	0	0	0	0	0
AAEL022177	pheromone-binding protein-related protein 6	6.99152	0	0	0	0	0
AAEL026223	lncRNA	6.82703	0	0	0	0	0
AAEL027631	uncharacterized LOC5575189	117.346	0	0	0	0	0
AAEL017262	protein snwA	1521.23	0.183983	0	0	0.208433	0.0744887
AAEL003116	arrestin homolog	31768	4.9718	0.0843674	0.663132	1.565	0.5996
AAEL003035	opsin-3	2116.92	0.424641	0.0843674	0.0695918	0.208433	0
AAEL023932	opsin-1-like	17361.5	4.73431	0.19903	0.370132	0.519284	0.159768
AAEL006498	opsin-1	17359	4.73431	0.19903	0.370132	0.519284	0.159768
AAEL006451	drosulfakinins	1557.41	0.510688	0	0.567737	0.157204	0.0439158
AAEL013535	arrestin homolog	7097.24	2.58978	0.168735	1.05924	0	0.157675
AAEL006259	opsin-1	91225	34.8993	1.21555	1.96795	4.44981	1.53975
AAEL023031	uncharacterized LOC110681177	1044.93	0.423241	0.0843674	0.487422	0.106014	0.036209
AAEL012377	general odorant-binding protein 72	425.007	0.0860478	0	0.227039	0	0.0789159
AAEL021199	transient receptor potential protein-like, transcript variant X2	152.125	0.0846482	0	0	0.0786019	0
AAEL005625	opsin-1	32.3272	0.0208379	0	0	0	0
AAEL020690	uncharacterized LOC5577556, transcript variant X2	90.8287	0	0	0.0695918	0	0
AAEL012089	uncharacterized LOC5575817	90.6359	0.0846482	0	0.077132	0	0
AAEL005575	transient-receptor-potential-like protein	3450.17	0.992678	0	3.22641	0.18102	0.113899
AAEL014615	cytochrome P450 9e2	331.555	0	0	0.41783	0	0.0806733
AAEL000937	probable insulin-like peptide 2, transcript variant X1	167.711	0.0993352	0	0.234579	0.0786019	0
AAEL006176	general odorant-binding protein 83a	302.659	0.256744	0	0.458435	0	0
AAEL000457	MORN repeat-containing protein 4, transcript variant X1	881.952	0.0846482	0.185492	1.4151	0	0.0439158
AAEL015424	cuticle protein 19	53.6226	0.0860478	0	0.0695918	0	0
AAEL004301	uncharacterized LOC5564497	620.067	0.271431	0.0700762	1.08424	0	0.121449
AAEL022087	lncRNA	45.7089	0.0846482	0	0	0	0
AAEL008940	chaoptin	121.485	0.0846482	0	0.252843	0	0
AAEL024977	phosphoglycolate phosphatase 1B, chloroplastic	227.853	0.0944382	0.0843674	0.502223	0	0.476986
AAEL008108	guanine nucleotide-binding protein subunit beta-2	630.72	1.61546	1.22639	0.388843	0	0.0802814
AAEL022735	uncharacterized LOC5566491, transcript variant X1	31.3853	0	0	0.0878553	0	0
AAEL012248	glycine receptor subunit alpha-3	29.6837	0.0846482	0	0	0	0
AAEL009615	opsin, ultraviolet-sensitive	1127.42	0.452615	0.0784231	3.44245	0.365636	0.0806733
AAEL025433	uncharacterized LOC5572607	25.5159	0	0.08487	0.0878553	0	0
AAEL005776	odorant receptor coreceptor	38.1211	0	0	0.146724	0	0
AAEL009421	peptidyl-prolyl cis-trans isomerase, rhodopsin-specific isozyme, transcript variant X1	345.953	0.169296	0.0843674	1.45154	0.444238	0.231615
AAEL005621	opsin-1	14.6331	0.0652098	0	0	0	0
AAEL011941	chorion peroxidase	312.743	0.878655	0.16279	0.90933	1.53751	0.601946
AAEL013511	pupal cuticle protein Edg-84A	54.5544	0.270031	0	0	0	0.0363656
AAEL004339	general odorant-binding protein 19d	34.6783	0.172096	0.0843674	0	0	0
AAEL024056	lncRNA	16.0341	0.0860478	0.0843674	0.077132	0	0
AAEL002231	adult cuticle protein 1	205.214	1.15289	0.325581	0.296631	0.106014	0
AAEL018183	tripartite motif-containing protein 45, transcript variant X1	15.4512	0	0	0.0878553	0	0.0413241
AAEL020342	uncharacterized LOC110676147	14.9812	0.0860478	0.0843674	0	0	0
AAEL023127	uncharacterized LOC110678083	14.1058	0.0846482	0	0.0695918	0	0
AAEL003183	farnesol dehydrogenase-like	26.6363	0.170696	0.0843674	0.0695918	0	0
AAEL005252	pro-corazonin	64.2884	0.0860478	0	0.428553	0	0
AAEL000073	general odorant-binding protein 72	102.942	0	0	0.696197	0.0786019	0
AAEL029006	glycine-rich protein, transcript variant X1	10.5683	0.0846482	0	0	0	0
AAEL006537	uncharacterized LOC5568109	77.1756	0.338593	0	0.662854	0.546657	0
AAEL024251	uncharacterized LOC110679401	54.5281	0.185383	0.0700762	0.234579	0.488275	0
AAEL009858	SIFamide-related peptide	224.003	0.541462	0.168735	0.223856	0.0786019	2.13544
AAEL007493	uncharacterized LOC5569224	82.5234	0	0	0.787236	0	0
AAEL011499	uncharacterized LOC5574884	62.7053	0.614222	0	0.0695918	0	0.0787593
AAEL012689	neither inactivation nor afterpotential protein G	338.413	3.41739	0	2.63578	0	0.118248
AAEL001754	uncharacterized LOC5572286	110.034	0	0.294596	1.12883	0.106014	0
AAEL009449	general odorant-binding protein 83a	89.0812	0.938128	0	0	0.106014	0
AAEL008013	pheromone-binding protein-related protein 6, transcript variant X1	25.3706	0.270031	0.154444	0.139184	0.106014	0.038123
AAEL012060	PBAN-type neuropeptides	40.964	0.454015	0	0.154264	0	0
AAEL020895	neuropeptide-like 3	436.255	5.28313	0.715294	0.157447	0	0
AAEL003211	carotenoid isomerooxygenase, transcript variant X1	317.799	3.17041	0	3.9011	0	0.036209
AAEL014964	uncharacterized LOC5565753	40.7787	0.35328	0.421837	0.231396	0.259622	0.508001
AAEL000071	general odorant-binding protein 72	6.77117	0.0860478	0	0.0695918	0	0
AAEL009593	histidine decarboxylase, transcript variant X2	27.5442	0.35328	0	0.311711	0	0
AAEL015586	uncharacterized LOC5579316	19.588	0.256744	0	0	0	0.0363656
AAEL018025	general odorant-binding protein 84a-like	6.65917	0	0	0.0878553	0	0.036209
AAEL011716	insulin-like growth factor-binding protein complex acid labile subunit	21.7357	0.268632	0.0843674	0.300988	0	0.0413241
AAEL012766	cytochrome P450 4c21	32.4084	0.455414	0	0.0878553	0	0
AAEL007085	adult-specific cuticular protein ACP-20	6.85854	0.0993352	0	0	0	0
AAEL015567	general odorant-binding protein 67	440.613	6.85361	0.0784231	0	0	0
AAEL004746	cuticle protein 8	9.87439	0.0846482	0.154444	0	0	0
AAEL015566	general odorant-binding protein 67	22.3017	0.356079	0	0	0	0.0363656
AAEL000596	neither inactivation nor afterpotential protein C	989.417	0.537263	0.0843674	16.2251	0	0.0820388
AAEL006454	general odorant-binding protein lush	20.9044	0.367967	0.31129	0.077132	0.318043	0.363547
AAEL023997	lncRNA	50.4164	0.98079	0	0	0.106014	0
AAEL020285	uncharacterized LOC110674032	22.5595	0.0846482	0	0.447712	0	0
AAEL000932	uncharacterized LOC5567486	23.026	0.0993352	0.459789	0.216316	0.0786019	0.267147

## Sheet: Thorax
GeneID	Description	TPM
		Head	Thorax	Abdomen	Ovaries	MTs	Gut
AAEL006481	uncharacterized LOC5568042, transcript variant X1	0	12.8035	0	0	0	0
AAEL009750	uncharacterized LOC5572368	0	32.7957	0	0	0	0
AAEL012061	uncharacterized LOC5575791	0	5.9288	0	0	0	0
AAEL020279	uncharacterized LOC5572960	0	255.976	0	0	0	0
AAEL010164	uncharacterized LOC5572961	0	296.287	0.0700762	0	0	0
AAEL010180	uncharacterized LOC5572962	0.0794395	1619.16	0.0700762	0	0.208433	0.510732
AAEL009904	stress response protein NST1	0	190.256	0	0.154264	0	0
AAEL003881	ubiquitin	0	382.038	0.0700762	0.37812	0	0
AAEL010160	uncharacterized LOC5572963	0.260243	302.063	0	0.396383	0	0.153248
AAEL010186	uncharacterized LOC5572959, transcript variant X2	0.169841	972.637	0	1.40747	0.106014	0
AAEL026724	lncRNA	0	162.177	0	0.322434	0	0.117039
AAEL005656	myosin heavy chain, muscle, transcript variant X1	0.180804	921.045	0	2.30111	0.287034	0.0776897
AAEL006575	troponin C, transcript variant X3	5.54025	1751.15	1.68345	0.392026	0.314447	0.20173
AAEL024495	uncharacterized LOC110679247, transcript variant X1	0	37.6234	0	0.164987	0	0
AAEL019639	uncharacterized LOC5566459	3.29452	746.798	0.816114	2.64242	0.318043	0.524709
AAEL003894	beta-1,3-glucan-binding protein	0.150945	40.4907	0	0	0.18102	0
AAEL012772	cytochrome P450 4C1	0.161908	37.2615	0	0.175711	0	0
AAEL022307	lncRNA	0.864025	181.57	0.148499	0.399566	0	0.125198
AAEL019438	uncharacterized LOC110681502, transcript variant X2	0	464.565	0	2.21415	0	0
AAEL019439	PDZ and LIM domain protein Zasp, transcript variant X1	0.735005	625.77	0.0784231	3.08606	0.499063	0.0413241
AAEL011797	venom allergen 5	1.87597	312.135	0	0.311711	0	0
AAEL007281	muscle M-line assembly protein unc-89	1.39547	202.963	0	1.58726	0.0786019	0.0820388
AAEL000320	probable cytochrome P450 313a2	0.411189	45.4583	0	0	0	0
AAEL011798	venom allergen 5	9.80864	944.375	0	0	0.0786019	0
AAEL001951	actin, indirect flight muscle, transcript variant X2	1.70915	160.621	0.773481	0.450895	0	1.82974
AAEL005964	actin, indirect flight muscle	0.241347	27.3611	0.453845	0	0	0.036209

## Sheet: Abdomen
GeneID	Description	TPM
		Head	Thorax	Abdomen	Ovaries	MTs	Gut
AAEL025659	lncRNA	0.00778668	0.0180125	6.35409	0	0.000505476	0
AAEL013542	elongation of very long chain fatty acids protein AAEL008004-like	0	0.183983	64.8006	0	0.574069	0
AAEL002228	fatty acid synthase	0.312853	0.768107	277.684	0.0878553	3.0001	0.157675
AAEL006824	cytochrome P450 4g15	0.376426	0.738733	332.726	3.76461	4.21029	0.241532
AAEL019874	cysteine-rich secretory protein LCCL domain-containing 1	0.867054	0.455414	67.6965	0.399566	0.365636	0.157815
AAEL001737	fatty acyl-CoA reductase wat	0.0715059	0.0846482	37.7873	0	0.491871	0
AAEL022506	fatty acid synthase	1.13033	0.185383	86.1108	0	0.59429	0.0363656
AAEL022809	lncRNA	0.0794395	0.581324	93.1302	0	1.32916	0.121466

## Sheet: Gut
GeneID	Description	TPM
		Head	Thorax	Abdomen	Ovaries	MTs	Gut
AAEL006382	trypsin-2, transcript variant X2	0	0	0	0	0	6.77866
AAEL010202	trypsin 5G1-like	0	0	0	0	0	6.64411
AAEL008600	zinc carboxypeptidase	0	0	0	0.234579	0.365636	107.718
AAEL008599	zinc carboxypeptidase	0.169841	0	0	0.208776	0.471651	115.537
AAEL008784	chymotrypsin-1	0	0.0846482	0	0.175711	2.25804	450.238
AAEL001301	alpha-tocopherol transfer protein-like	0	0	0	0	0.0786019	14.9775
AAEL000206	ninjurin-2	0	0.169296	0	0.0878553	0.18102	29.8277
AAEL029070	-	0.0794395	0	0	0	0.106014	17.2648
AAEL001703	serine protease SP24D	4.16951	9.72397	2.2467	9.94738	358.26	57694.5
AAEL009330	carbonic anhydrase	0.158879	0.0846482	0.0784231	0.476698	10.0244	1581.96
AAEL003060	trypsin-1	8.62681	21.0926	4.45935	23.2115	714.003	112088
AAEL014516	seminal metalloprotease 1	0.747843	4.82836	0.884028	3.55868	133.627	20498
AAEL003424	zinc carboxypeptidase	0.249281	0	0	0.0878553	0.656228	92.8633
AAEL013703	trypsin-1	21.9216	0.507889	0.319637	0.693014	24.4719	3097.05
AAEL007818	trypsin 3A1, transcript variant X2	10.7781	31.8308	6.52291	30.0024	1391.35	168584
AAEL001690	chymotrypsin-2	5.60955	0.35328	0	0	3.58484	672.386
AAEL013885	uncharacterized LOC5578882	1.73819	16.4028	0.31129	9.94376	76.2826	8700.91
AAEL009844	uncharacterized LOC5572525	0	0	0.156846	0	2.69288	291.305
AAEL002263	MBF2 transcription initiator	4.94501	4.60877	0.0700762	1.55392	9.24337	996.544
AAEL010776	zinc carboxypeptidase A 1	0.0715059	0.183983	0	0.340698	7.52209	805.01
AAEL023271	lncRNA	0.361608	0	0	0	0.263218	38.3374
AAEL007592	mite group 2 allergen Tyr p 2	0.241347	0	0	0.0878553	0.393049	41.3331
AAEL004933	lipase 1	0	0	0	0	0.259622	26.4776
AAEL022600	protein G12	0.090402	0	0	0.0695918	1.69831	169.234
AAEL000223	uncharacterized family 31 glucosidase KIAA1161	0	0.170696	0	0.322434	1.2267	120.492
AAEL006483	uncharacterized LOC5568046	0.0794395	1.16057	0	2.66158	4.86153	448.531
AAEL010782	zinc carboxypeptidase A 1	0.591993	0.384054	0.168735	0.693014	17.9394	1629.05
AAEL006953	peritrophin-1	0.271206	17.7021	0.0784231	12.0767	17.9929	1611.41
AAEL002467	probable chitinase 10	0.926771	0.255344	0	0.0695918	1.64716	142.026
AAEL000651	maltase A3	0	0.509289	0	0.157447	0.574069	48.3882
AAEL022646	chymotrypsin-2	0.233414	0.0993352	0	0.0878553	3.58128	300.757
AAEL013421	alpha-amylase 2	0	0.0860478	0	0.0878553	0.39301	31.9294
AAEL007601	trypsin 5G1-like	0	0	0	0	1.26442	102.234
AAEL021931	uncharacterized LOC5578604, transcript variant X2	0.0715059	7.33576	0	1.66818	5.34044	588.127
AAEL013118	protein G12	0.161908	0	0	0.0878553	0	12.9803
AAEL009531	Niemann-Pick type protein homolog 1B	0	0	0	0	0.491871	38.7862
AAEL009843	trypsin-1	0	0.0846482	0.0700762	0.146724	1.90674	148.896
AAEL008117	uncharacterized LOC5570144	0.0794395	0	0	0.157447	0.307255	23.3429
AAEL007926	retinoid-inducible serine carboxypeptidase	0.702117	0.42744	0	1.16854	4.19215	315.774
AAEL007591	mite group 2 allergen Gly d 2.01	0.0794395	0.0993352	0	0.223856	0.34182	25.4296
AAEL013628	trypsin alpha-3	0.150945	0.566637	0	0.942673	23.2273	1697.85
AAEL009036	uncharacterized LOC5571393	0	0	0	0.077132	0	5.48118
AAEL001674	serine protease SP24D	0.180804	0	0	0	0	12.7518
AAEL004092	uncharacterized LOC5564107	0	0	0	0.0878553	0.0786019	6.13914
AAEL009680	chymotrypsin-2	0.241347	5.43217	0	2.78831	9.55333	647.836
AAEL011510	multiple inositol polyphosphate phosphatase 1, transcript variant X2	2.26005	0.667372	0.0784231	0.541933	1.04212	147.597
AAEL000500	uncharacterized LOC5578455	0.320787	1.20956	0.0843674	0.688657	11.1177	717.641
AAEL006011	serine protease inhibitor dipetalogastin	6.40448	6.14008	5.12877	1.53912	22.438	1424.92
AAEL028066	flocculation protein FLO11	0	2.1162	0	0.945578	3.81005	240.989
AAEL003298	membrane-bound alkaline phosphatase	0	0.185383	0	0.0878553	4.85561	306.909
AAEL015070	membrane-bound alkaline phosphatase	0	0	0	0.216316	0.499024	31.3366
AAEL023729	trypsin 5G1-like	0.222451	0.480655	0	0.157447	12.1789	737.505
AAEL006902	collagenase	0	0	0	0	3.39179	205.106
AAEL000647	maltase A1	6.14766	7.45456	0.210229	1.28281	6.8006	449.45
AAEL008769	serine protease SP24D	0.344685	0.298006	0.0700762	0.548596	4.52747	268.523
AAEL010868	facilitated trehalose transporter Tret1	0.090402	0	0.154444	0.55383	0.464459	32.7046
AAEL019828	aminopeptidase N	0	0	0	0	2.97268	174.15
AAEL008609	zinc carboxypeptidase	0.0715059	0.170696	0.140152	0.077132	1.59238	93.2211
AAEL013715	trypsin 5G1-like	0	0.19793	0	0.41783	4.19742	238.565
AAEL001837	pancreatic lipase-related protein 2	0.090402	0.0860478	0	0.685474	2.6749	150.801
AAEL013623	trypsin eta	0	0.270031	0	1.7995	41.5052	2298.09
AAEL019470	protein G12	0	0.183983	0	0.0695918	0.322795	17.6729
AAEL012866	uncharacterized LOC5576915	0	0.761834	0.154444	0.0878553	1.16476	61.8528
AAEL001577	neurogenic locus notch homolog protein 1	0.392293	7.45184	0.0843674	1.33006	4.24346	389.398
AAEL022387	nose resistant to fluoxetine protein 6, transcript variant X1	0.389264	1.99517	0.168735	0.593262	0.645479	100.199

## Sheet: MTs
GeneID	Description	TPM
		Head	Thorax	Abdomen	Ovaries	MTs	Gut
AAEL012641	uncharacterized LOC5576626	0	0	0	0	43.1178	0
AAEL012645	uncharacterized LOC5576621	0	0	0	0	72.6644	0
AAEL012652	uncharacterized LOC5576618	0	0	0	0	26.2714	0
AAEL012644	uncharacterized LOC5576617	0.090402	0.172096	1.4716	4.33966	20360	10.2507
AAEL001650	mite group 2 allergen Gly d 2.02	0.0715059	0.0860478	0	0	124.081	0
AAEL017538	uncharacterized LOC23687958	0.126155	0.256744	0.11226	0.694188	4188.31	3.29697
AAEL002612	uncharacterized LOC5575310	0.126155	0.256744	0.11226	0.694188	4187.63	3.29697
AAEL006995	sodium-coupled monocarboxylate transporter 1, transcript variant X1	0.554201	0.0993352	0.81017	0.399566	1091.09	1.01983
AAEL004213	monocarboxylate transporter 7	0	0	0.0700762	0.572094	1128.66	1.07715
AAEL014910	synaptic vesicle glycoprotein 2B	0.0794395	0.0860478	0.0700762	0.164987	178.661	0.225587
AAEL006700	venom serine protease 34	0	0	0	0	206.402	0.31976
AAEL005533	synaptic vesicle glycoprotein 2B	0	0	0	0	25.4777	0.0425503
AAEL007126	facilitated trehalose transporter Tret1-2 homolog, transcript variant X2	0	0	0	0.832198	1384.89	2.48321
AAEL001575	monocarboxylate transporter 12	0.222451	0.342792	0	0.388843	198.981	0.11757
AAEL007139	facilitated trehalose transporter Tret1	0.260243	0.185383	0.210229	0.476698	1935.59	3.87091
AAEL017334	flocculation protein FLO11	0.520487	0	0.296999	2.17042	9378.01	20.1825
AAEL012647	uncharacterized LOC5576616	0	0.0860478	0	0	68.3252	0.153013
AAEL000196	alkaline phosphatase, tissue-nonspecific isozyme	0.090402	0	0.168735	0.520487	267.154	0.667536
AAEL021555	synaptic vesicle glycoprotein 2A	1.14619	1.56704	0.140152	0.41029	592.162	1.27487
AAEL010917	solute carrier organic anion transporter family member 5A1	0.320787	0.185383	0.0700762	0	168.397	0.496378
AAEL005925	geranylgeranyl pyrophosphate synthase	0.0715059	0.0846482	0	0.077132	28.3181	0.0425503
AAEL002908	uncharacterized LOC5576463	0	0	0	0.0695918	26.4054	0.0806733
AAEL009205	feline leukemia virus subgroup C receptor-related protein 2	0	0.339992	0	0.762606	717.408	2.28138
AAEL012646	uncharacterized LOC5576619	0.090402	0	0.0700762	0	630.09	2.06795
AAEL026592	lncRNA	0	0	0	0.077132	23.1808	0.0439158
AAEL022695	uncharacterized LOC5576459	1.5533	2.28476	1.6527	2.26782	6939.68	23.2735
AAEL011559	zinc metalloproteinase nas-14, transcript variant X2	0.0715059	0	0	0	21.1502	0.038123
AAEL012650	uncharacterized LOC5576615	1.09744	0.654085	0.570336	1.11403	499.885	1.71309
AAEL007016	sodium-coupled monocarboxylate transporter 1	0.543238	0	0	0	153.105	0.0725747
AAEL007131	facilitated trehalose transporter Tret1	0.293957	0.170696	0.16279	1.3347	374.004	0.903813
AAEL023862	lncRNA	0	0	0	0	9.75722	0.0363656
AAEL011411	facilitated trehalose transporter Tret1	0	0	0	0	20.0807	0.0802814
AAEL004048	UNC93-like protein	10.6148	4.1568	0.434748	0.759423	2468.98	5.24938
AAEL007703	uncharacterized LOC5569528	0.170973	0.0860478	0.45466	1.86189	6413.74	29.5977
AAEL003426	sialin	0.0715059	0.183983	0	0.077132	376.555	1.74106
AAEL013040	uncharacterized LOC5577164	0.0794395	0	0.148499	0.744342	164.791	0.766711
AAEL007128	facilitated trehalose transporter Tret1	0	0.185383	0.0700762	0.231396	1043.3	5.14088
AAEL012639	uncharacterized LOC5576614	0.090402	0	0	0.154264	1092.88	5.468
AAEL021099	solute carrier organic anion transporter family member 2A1, transcript variant X2	8.74883	0.538663	0.218575	0.935133	1744.81	0.781479
AAEL019584	chitinase-3-like protein 1, transcript variant X2	0	0	0	0.077132	13.4308	0.0743321
AAEL007780	uncharacterized LOC5569630	0	4.54642	0	0.077132	764.303	1.39168
AAEL001654	epididymal secretory protein E1	0.150945	0.0846482	0	0.154264	24.4214	0
AAEL012651	uncharacterized LOC5576620	0	0	0	0	5.49406	0.0363656
AAEL019955	solute carrier family 26 member 10	3.30213	0.767432	0.81017	9.29252	1350.22	2.12231
AAEL001929	protein spaetzle 5	0.652536	0.467302	0	1.37648	196.275	0.14722
AAEL005849	synaptic vesicle glycoprotein 2C, transcript variant X1	25.3899	10.1695	1.59668	1.00908	3352.48	14.3036
AAEL006467	alcohol dehydrogenase class-3	0.0715059	0.869566	0.154444	0.912513	257.824	2.01597
AAEL002742	synaptic vesicle glycoprotein 2B	0.814444	0.0860478	0.0784231	7.32445	933.24	1.64899
AAEL006607	uncharacterized LOC5568173	0	0	0	0.319251	491.939	3.86375
AAEL024339	luciferin 4-monooxygenase	0.783759	0.740133	0.939813	0.945857	120.05	0.994883
AAEL005854	proton-coupled amino acid transporter-like protein CG1139, transcript variant X2	2.883	0.639398	0.0700762	0.461618	337.754	0.434946
AAEL007138	facilitated trehalose transporter Tret1-2 homolog, transcript variant X1	0.0715059	0	0.140152	7.58048	819.924	1.42428
AAEL012981	solute carrier family 22 member 8	0.293957	0	0.140152	0.329975	879.14	8.20979
AAEL000618	protein Wnt-6	0.40816	0	0	0.077132	141.37	1.40029
AAEL008146	zinc transporter ZIP14	16.796	8.15968	0.718835	6.92696	1652.86	7.31339
AAEL003389	attacin-B	0	0.0860478	0	0	98.2391	1.16852
AAEL010098	phosphoglycolate phosphatase 2	0.392293	0.0846482	0	0.077132	29.1748	0.157815
AAEL017539	cytochrome P450 6a2	0.0794395	0	0	0	34.5007	0.466118
AAEL011557	zinc metalloproteinase nas-14	0.0794395	0	0	0.146724	64.5978	0.887925
AAEL011540	zinc metalloproteinase nas-14	0	0	0	0.0878553	6.28163	0
AAEL015451	uncharacterized LOC5579424	0	0	0	0.630962	44.2234	0.240688
AAEL014684	probable cytochrome P450 6d5	0	0	0	0	8.19545	0.122832
AAEL015253	uncharacterized LOC5579495	0	0	0	0	11.8194	0.181358
AAEL004805	sodium/potassium/calcium exchanger 4	50.8662	6.89213	10.264	89.7643	5773.93	10.2089
AAEL004513	glycine receptor subunit alpha-2	1.24838	0.994077	0.538212	7.65387	728.955	12.546
AAEL017067	peritrophin-48	0	0	0	0.0878553	6.65933	0.118404
AAEL006689	venom serine protease, transcript variant X1	0.180804	0	0	0.454078	25.5336	0.275228
AAEL027389	lncRNA	1.5666	1.77331	0	0.804708	97.7766	0.0108409
AAEL011543	astacin	0	0	0	0.139184	7.37335	0.0439158
AAEL002619	chondroitin proteoglycan-2	0	0.19867	0	0	10.1773	0.0802814

## Sheet: Ovaries
GeneID	Description	TPM
		Head	Thorax	Abdomen	Ovaries	MTs	Gut
AAEL000379	cysteine-rich venom protein 6	0	0	0	8.93634	0	0
AAEL005554	uncharacterized LOC5566690	0	0	0	13.1788	0	0
AAEL006132	uncharacterized LOC5567523	0	0	0	9.7738	0	0
AAEL010175	solute carrier family 35 member G1	0	0	0	9.49107	0	0
AAEL010421	E3 ubiquitin-protein ligase CCNB1IP1, transcript variant X1	0	0	0	7.12115	0	0
AAEL011631	uncharacterized LOC110679465	0	0	0	14.8998	0	0
AAEL013295	uncharacterized LOC5577588	0	0	0	120.869	0	0
AAEL014046	protein fem-1 homolog C	0	0	0	24.4635	0	0
AAEL014380	uncharacterized LOC5564280	0	0	0	19.6661	0	0
AAEL014924	probable cytochrome P450 6d4	0	0	0	6.48332	0	0
AAEL015042	uncharacterized LOC5565996	0	0	0	40.1213	0	0
AAEL019080	-	0	0	0	5.05206	0	0
AAEL019336	-	0	0	0	14.4505	0	0
AAEL021042	lncRNA	0	0	0	6.56296	0	0
AAEL021758	lncRNA	0	0	0	29.957	0	0
AAEL022110	lncRNA	0	0	0	20.7488	0	0
AAEL024274	uncharacterized LOC110677056, transcript variant X2	0	0	0	22.6553	0	0
AAEL024355	lncRNA	0	0	0	7.93888	0	0
AAEL024633	lncRNA	0	0	0	51.7558	0	0
AAEL024800	vesicle-associated membrane protein/synaptobrevin-binding protein-like	0	0	0	161.534	0	0
AAEL024840	lncRNA	0	0	0	7.8542	0	0
AAEL025303	vitelline membrane protein 15a-3-like	0	0	0	148.014	0	0
AAEL025341	lncRNA	0	0	0	7.08771	0	0
AAEL025667	SET and MYND domain-containing protein 4	0	0	0	12.8604	0	0
AAEL025770	uncharacterized LOC110675757, transcript variant X1	0	0	0	8.57046	0	0
AAEL025814	uncharacterized LOC5575944	0	0	0	9.12077	0	0
AAEL026249	lncRNA	0	0	0	8.41608	0	0
AAEL026257	uncharacterized LOC110674230	0	0	0	7.49034	0	0
AAEL026329	lncRNA	0	0	0	10.0709	0	0
AAEL026426	carboxypeptidase Y-like	0	0	0	5.24497	0	0
AAEL026607	lncRNA	0	0	0	7.8542	0	0
AAEL026611	lncRNA	0	0	0	6.66333	0	0
AAEL027718	uncharacterized LOC110676787	0	0	0	26.5543	0	0
AAEL027880	lncRNA	0	0	0	13.0486	0	0
AAEL027925	insulin-like growth factor 2 mRNA-binding protein 1	0	0	0	113.21	0	0
AAEL029026	#N/A	0	0	0	10.1043	0	0
AAEL022108	lncRNA	2.71206e-07	0	0	5.6211	0	0
AAEL020201	lncRNA	0	0	0	222.419	0	0.0363656
AAEL009787	uncharacterized LOC5572405	0	0	0	84.799	0	0.0439158
AAEL001666	meiosis regulator and mRNA stability factor 1	0.271206	0.0846482	0.674939	1082.82	0.416865	0.357491
AAEL012453	uncharacterized LOC5576303	0	0	0	55.4555	0	0.0363656
AAEL021735	vitelline membrane protein 15a-3-like	0	0.0860478	0	130.789	0	0
AAEL007657	putative vitellogenin receptor	0	0	0.33747	511.065	0.102418	0.212029
AAEL007097	phosphoglycolate phosphatase 1B, chloroplastic	0.180804	0.0993352	3.66929	5255.76	2.07713	2.9618
AAEL005938	zinc finger protein with KRAB and SCAN domains 5	0	0	0	99.3344	0	0.0725747
AAEL013288	uncharacterized LOC5577590	0	0	0.0843674	104.697	0	0
AAEL007584	protein trunk	0.241347	0	0.33747	399.676	0.310851	0.327842
AAEL000442	maternal effect protein oskar	0.180804	0.0993352	1.34988	1576.9	0.72412	0.66231
AAEL000961	uncharacterized LOC5567452	0	0	0.199819	402.455	0	0.34616
AAEL002036	uncharacterized LOC5573177	0	0	0.0843674	243.831	0.102418	0.212029
AAEL019583	protein bicaudal C, transcript variant X2	0	0	0.0843674	97.1152	0	0.0852398
AAEL026111	tubulin alpha-8 chain-like	0.0794395	0	0	240.728	0.212028	0.0425503
AAEL008029	ras-related protein Rab-35, transcript variant X1	0	0	0.0843674	94.3226	0	0.0439158
AAEL015128	uncharacterized LOC5566360	0.0715059	0.0423241	0	78.8725	0.0530071	0.0620986
AAEL023417	uncharacterized LOC110680251	0.0715059	0.0423241	0	78.8725	0.0530071	0.0620986
AAEL010097	maternal protein exuperantia-2	0.40816	0.0993352	3.02293	3452.56	1.25415	3.18326
AAEL004462	microtubule-associated protein futsch, transcript variant X3	0.271206	0.0846482	0	289.272	0.102418	0.118762
AAEL004388	chorion peroxidase-like	0.260243	0	0.998117	1059.35	0.385857	0.883096
AAEL013799	zinc finger protein 14	0.0715059	0	0	107.213	0.102418	0.0802814
AAEL021453	uncharacterized LOC110681172	0.0715059	0	0.643772	650.818	0.420461	0.313576
AAEL003404	uncharacterized LOC5578108, transcript variant X2	0.090402	0	1.18114	1144.5	0.208433	0.693717
AAEL006726	innexin inx4	0.0715059	0.183983	0.590572	562.833	0.526475	0.248394
AAEL007783	histone H3-like centromeric protein cid	0	0	0.421837	398.593	0.102418	0.333634
AAEL001976	cAMP-dependent protein kinase catalytic subunit beta	0	0	0.0843674	76.2809	0	0.0725747
AAEL012018	uncharacterized LOC5575710, transcript variant X2	0.0715059	0	0.33747	300.451	0.208433	0.0878316
AAEL010583	ranBP-type and C3HC4-type zinc finger-containing protein 1	0.0715059	0	0.0843674	73.5107	0	0
AAEL000776	E3 ubiquitin-protein ligase TRIM37	0.090402	0	0.928041	775.531	0.208433	0.86938
AAEL000923	tenascin	0.0715059	0	1.26551	1040.17	0.102418	0.33486
AAEL008182	uncharacterized LOC5570231	0	0	0.323178	309.658	0.39301	0.342942
AAEL002103	histone H1, gonadal	0.455865	0	0.506204	390.269	0	0.166747
AAEL012015	DEAD-box helicase Dbp80	0	0	0.168735	129.973	0	0.124197
AAEL001958	uncharacterized LOC5573185, transcript variant X2	0	0	0.0843674	64.3821	0	0
AAEL022128	-	0	0	0.253102	191.67	0.212028	0.0725747
AAEL008678	microtubule-associated protein RP/EB family member 1	0	0	0	132.5	0.102418	0.175663
AAEL020680	probable E3 ubiquitin protein ligase DRIPH	0	0	0.0843674	63.599	0	0.0802814
AAEL008580	gametocyte-specific factor 1 homolog	0.090402	0.185383	0.646357	483.246	0.102418	0.168113
AAEL002586	uncharacterized LOC5575331	0	0	0.168735	230.135	0.310851	0.0878316
AAEL008098	protein aubergine	0.0715059	0	0	81.6146	0.106014	0.116647
AAEL000739	uncharacterized LOC5566292	0.090402	0	0.33747	231.729	0.18102	0.0878316
AAEL003010	E3 ubiquitin-protein ligase TRIM39	0	0	0	53.6719	0.0786019	0.0439158
AAEL002968	uncharacterized LOC5576708	0.0715059	0	0	199.574	0.106014	0.29231
AAEL001559	proto-oncogene serine/threonine-protein kinase mos	0.090402	0	0.154444	105.179	0	0.0439158
AAEL000335	lamin Dm0	0.161908	0.19867	0.590572	400.812	0.106014	0.186787
AAEL013813	cap-specific mRNA (nucleoside-2'-O-)-methyltransferase 1	0.0715059	0	0.0843674	190.253	0.29063	0.168113
AAEL021169	lncRNA	0.0794395	0	0.168735	235.176	0.369232	0.0363656
AAEL026038	chorion peroxidase	0.286024	0	1.49003	923.369	0.318043	0.408957
AAEL011472	uncharacterized LOC5574865	0	0	0.168735	103.829	0	0.0878316
AAEL000769	serine-arginine protein 55	0	0	0.0843674	97.3237	0	0.160563
AAEL013338	protein lethal(2)essential for life	0.180804	0.271431	1.60298	966.276	0.409673	0.723918
AAEL006354	epoxide hydrolase 4	0.090402	0.0846482	0.253102	152.151	0.102418	0.0802814
AAEL008595	protein maelstrom homolog, transcript variant X1	0.090402	0	0.506204	302.697	0.393049	0.160563
AAEL009454	uncharacterized LOC5571975	0.0794395	0	0.0843674	50.0337	0	0
AAEL005153	uncharacterized protein CG13380	0	0.0846482	0.168735	99.8701	0.102418	0.0363656
AAEL009411	putative helicase mov-10-B.1, transcript variant X1	0.0794395	0.19867	0.168735	116.021	0	0.0439158
AAEL015682	histone H2B	0.090402	0	0	52.7163	0	0
AAEL014276	protein lin-37 homolog	0	0	0.0843674	49.1965	0	0
AAEL019961	uncharacterized LOC5571050, transcript variant X2	0.230385	0.172096	0.323178	183.504	0	0.0363656
AAEL012107	uncharacterized LOC5575827	0.161908	0	0.253102	141.87	0.204837	0.0439158
AAEL009709	uncharacterized LOC5572322	0	0	0.0843674	46.1751	0	0
AAEL008829	uncharacterized LOC5571135	0.230385	0.0860478	0.998117	541.604	0	0.304819
AAEL015683	histone H2B	0	0	0	21.512	0	0.0401407
AAEL019636	histone H2B-like	0	0	0	21.512	0	0.0401407
AAEL009654	uncharacterized LOC5580029	0	0	0.168735	88.8164	0	0.0363656
AAEL019551	uncharacterized LOC5566023	0.260243	0.384054	0.253102	201.03	0.106014	0.196929
AAEL004624	inner centromere protein B	0	0	0	41.922	0	0.0802814
AAEL027153	uncharacterized LOC5565539, transcript variant X1	0.090402	0.0860478	0.148499	77.4358	0	0.0439158
AAEL003685	histone H3	0	0	0	34.2764	0	0.0658737
AAEL019635	histone H3	0	0	0	34.2764	0	0.0658737
AAEL004386	chorion peroxidase	0	0	1.01241	505.426	0.502659	0.430066
AAEL020655	uncharacterized LOC5570969, transcript variant X1	0.150945	0	0.168735	83.2939	0	0.0439158
AAEL013852	J domain-containing protein CG6693	0.0794395	0.185383	0.168735	91.2161	0.102418	0
AAEL004861	E3 ubiquitin-protein ligase RNF4	0.090402	0	0.0843674	43.8248	0	0
AAEL021162	uncharacterized LOC5577047	0	0	0	51.2881	0.106014	0.0727313
AAEL007879	uncharacterized LOC5569726	0.0794395	0	0.559487	266.767	0	0.150629
AAEL008843	gametocyte-specific factor 1 homolog	0.419122	0	0.253102	198.122	0.102418	0.174298
AAEL013027	vitelline membrane protein 15a-1	0.161908	0	0	76.4033	0	0
AAEL013692	protein aubergine	0	0.0993352	0.253102	117.927	0.0786019	0.038123
AAEL005922	zinc finger protein 768, transcript variant X1	0.161908	0.183983	0.0843674	239.988	0.519284	0.210663
AAEL014561	vitelline membrane protein 15a-3	0.317758	0.169296	0	142.747	0	0.0776897
AAEL004390	chorion peroxidase-like	0.0715059	0	0.561989	246.128	0	0.47894
AAEL010240	uncharacterized LOC5580037, transcript variant X1	0	0.0993352	0.0843674	54.297	0.102418	0.124197
AAEL013822	Fanconi anemia group M protein	0.241347	0	0	105.251	0.212028	0.0878316
AAEL012960	importin subunit alpha	0.795548	0.814292	0.640412	347.759	0.102418	0.441897
AAEL019591	uncharacterized LOC5568644, transcript variant X2	0	0	0.0843674	35.4196	0	0
AAEL020431	uncharacterized LOC110674320	0.090402	0	0	37.8868	0	0.0363656
AAEL013453	cingulin	0.0794395	0	0.0843674	33.9911	0	0
AAEL000698	uncharacterized LOC5565917, transcript variant X1	0.0715059	0	0	28.6729	0	0
AAEL018187	forkhead box protein N2, transcript variant X5	0.233414	0.185383	0.33747	134.389	0.102418	0.0878316
AAEL011085	uncharacterized LOC5574367	0.773623	0.185383	0.491913	307.458	0.208433	0.305869
AAEL021919	lncRNA	0.161908	0.0860478	0.0700762	94.983	0.0786019	0.241532
AAEL002652	protein cup, transcript variant X2	0.090402	1.29488	1.12398	507.234	0.618106	0.616794
AAEL009263	uncharacterized LOC5571736, transcript variant X1	0.180804	0.0860478	0.168735	69.3911	0.102418	0.0802814
AAEL021011	uncharacterized LOC110675929, transcript variant X1	0	0	0.0843674	32.3314	0	0
AAEL027823	lncRNA	0.490628	0	0	187.424	0.212028	0.0425503
AAEL020191	G2/mitotic-specific cyclin-B3, transcript variant X1	0.519437	0.443526	1.27134	484.815	0.495467	0.534912
AAEL020143	lncRNA	0.0794395	0	0.0772218	34.8736	0.0923081	0
AAEL023807	lncRNA	0.0794395	0	0.0772218	34.8736	0.0923081	0
AAEL004130	GS homeobox 1	0	0	0	16.5315	0	0.0439158
AAEL011413	E3 ubiquitin-protein ligase RNF25	0.0715059	0	0.0843674	79.6809	0.212028	0.0724181
AAEL021449	uncharacterized LOC110681489	0.130794	0	0	47.0621	0.0786019	0
AAEL004172	tubulin alpha-8 chain	3.04409	3.19911	1.95222	1149.23	2.04021	2.4932
AAEL005923	zinc finger protein 583, transcript variant X2	0	0.0846482	0.253102	90.2778	0.0786019	0.0439158
AAEL003669	histone H2A	0	0	0.0843674	29.6838	0	0
AAEL013300	uncharacterized LOC5577589	0.0715059	0	0.0700762	71.8207	0.18102	0.209141
AAEL011376	wee1-like protein kinase, transcript variant X2	0.150945	0	0.168735	69.33	0	0.204714
AAEL010094	G2/mitotic-specific cyclin-B	1.20674	0.284718	0.843674	407.916	0.310851	0.318221
AAEL023150	H/ACA ribonucleoprotein complex subunit 1-like	0	0	0.0149287	13.2324	0.040331	0.0194021
AAEL011715	non-structural maintenance of chromosomes element 1 homolog	0	0	0.168735	55.3142	0	0.0776897
AAEL023464	pinin-like	0.150945	0.185383	0.140152	60.6856	0.106014	0.0363656
AAEL006720	chromo domain-containing protein cec-1	0.150945	0	0	48.2327	0.102418	0.0413241
AAEL017403	vitelline membrane protein 15a-2	0.169841	0.0846482	0	54.1466	0	0
AAEL012168	uncharacterized LOC5575915	0	0.0993352	0.16279	51.2181	0.0786019	0.0802814
AAEL003382	60 kDa SS-A/Ro ribonucleoprotein homolog	0.222451	0.0846482	0.156846	140.477	0.447834	0.124197
AAEL010229	uncharacterized LOC5580033	0.0715059	0.253945	0.983826	307.874	0.29063	0.277053
AAEL003950	chromatin-remodeling complex ATPase chain Iswi	0.158879	0.271431	0.154444	157.793	0.519284	0.109097
AAEL026387	O-acyltransferase like protein, transcript variant X2	0	0	0.16279	48.7593	0	0
AAEL006123	serine protease gd	0.214518	0	0.168735	63.393	0	0.0363656
AAEL026650	uncharacterized LOC110680300	0	0	0.0843674	38.1012	0.106014	0.129156
AAEL006884	uncharacterized LOC5568483, transcript variant X1	0	0.0846482	0.331525	95.2171	0	0.0363656
AAEL011836	histone-lysine N-methyltransferase ASHR1, transcript variant X1	0	0	0	22.4959	0.0786019	0.0439158
AAEL026460	histone H3	0	0	0.0843674	29.2864	0.102418	0
AAEL008511	E3 ubiquitin-protein ligase TRIM37	0	0	0.0843674	51.3217	0.18102	0
AAEL008137	uncharacterized LOC5570170	0.562134	0	0.331525	154.243	0.385857	0.209298
AAEL007458	proton-coupled amino acid transporter-like protein CG1139	0	0	0.247158	66.2895	0	0.0802814
AAEL007133	uncharacterized LOC5568789	0	0	0	14.9292	0	0.0559882
AAEL020276	uncharacterized LOC110676104	0	0	0	14.9292	0	0.0559882
AAEL019637	histone H1	0	0	0.0843674	28.2461	0.106014	0
AAEL005286	uncharacterized LOC5566255, transcript variant X2	0.161908	0	0.0843674	42.8361	0	0.0439158
AAEL002320	uncharacterized LOC5574200	0	0.0860478	0	22.7038	0	0
AAEL013721	RISC-loading complex subunit tarbp2	0	0	0.168735	43.6513	0	0.116647
AAEL007053	uncharacterized LOC5568689, transcript variant X1	0	0	0.168735	42.6142	0.106014	0.0802814
AAEL021209	protein cortex, transcript variant X1	0	0.19867	0.168735	49.7241	0	0.0363656
AAEL003673	histone H4	0	0	0.130287	32.2172	0	0
AAEL027438	uncharacterized LOC110678927	0.230385	0.0846482	0.168735	56.5941	0	0.0439158
AAEL004396	octopamine receptor	0.702117	0	0.0843674	171.434	0.102418	0.285683
AAEL004978	ATP-dependent RNA helicase vasa, transcript variant X1	7.21244	5.17049	7.26048	1769.05	7.03304	6.08878
AAEL023288	E3 ubiquitin-protein ligase TRIM37-like, transcript variant X1	0.0715059	0	0.0784231	19.0217	0	0.0439158
AAEL014180	E3 ubiquitin-protein ligase TRIM37	0.161908	0	0.154444	132.545	0.546657	0.168113
AAEL024965	microtubule-associated protein futsch-like, transcript variant X3	0.301891	0.0993352	1.26551	302.212	0.106014	0.202364
AAEL006208	uncharacterized LOC5567615	0.403255	0.170696	0.668995	158.219	0.204837	0.366799
AAEL017179	farnesol dehydrogenase-like	0.090402	0.0846482	0.247158	209.323	0.283439	0.913532
AAEL000604	putative uncharacterized protein DDB_G0282129	0.384359	0.424641	0.875682	199.975	0.208433	0.772938
AAEL025743	lncRNA	0.0794395	0	0.241214	57.8264	0.259622	0.196094
AAEL004316	uncharacterized LOC5564548	0	0	0.843674	187.149	0.106014	0.131747
AAEL023618	testis-specific serine/threonine-protein kinase 3	0	0	0.168735	46.7904	0.212028	0
AAEL008673	ras-related protein Rab-9B	0.143012	0.342792	0.0843674	74.5097	0	0.236652
AAEL027325	histone H4	0	0	0.207182	44.2631	0.106014	0.0776897
AAEL017289	fibrous sheath CABYR-binding protein	0	0	0.168735	36.0047	0.102418	0
AAEL002554	anosmin-1, transcript variant X3	1.19275	0.253945	0.395657	261.497	0.204837	1.22969
AAEL021549	uncharacterized LOC110676044	0	0	0	7.71529	0	0.0363656
AAEL018177	putative helicase mov-10-B.1	0.150945	0	0.0843674	38.9299	0.184616	0.0802814
AAEL011653	pachytene checkpoint protein 2 homolog	1.00213	0.614222	1.05871	219.07	0.235806	0.500079
AAEL026208	lncRNA	0.090402	0	0	18.5963	0	0
AAEL000416	mucin-17	0.622678	0.55335	0.696197	144.551	0.7039	0.419168
AAEL007855	uncharacterized LOC5569701	0.0794395	0.172096	0.33747	69.0557	0	0
AAEL020232	lncRNA	0	0	0.0843674	17.2502	0	0
AAEL010291	uncharacterized LOC5573101, transcript variant X4	0	0.0846482	0	17.0881	0	0
AAEL027148	transformer-2 protein homolog beta-like, transcript variant X1	0.0715059	0.170696	0.238811	48.1602	0.102418	0.193346
AAEL005383	adenosine monophosphate-protein transferase FICD homolog	0	0.253945	0.33747	67.6925	0	0.110854
AAEL024827	transcription factor 4-like	0.535559	0.922716	0.395657	184.642	0.29063	0.3284
AAEL021790	zinc finger protein 426	0.143012	0.170696	0	33.2024	0	0
AAEL001357	serine/arginine repetitive matrix protein 2	0.463799	0	0.148499	87.7714	0.310851	0.0727313
AAEL026682	lncRNA	0	0	0.0392115	14.7384	0.0786019	0
AAEL004104	uncharacterized LOC5564122	0	0	0.0843674	21.2171	0	0.115282
AAEL011330	borealin, transcript variant X2	0.312853	0.298006	0.983826	180.599	0.29063	0.208072
AAEL008415	uncharacterized LOC5570601, transcript variant X2	0	0	0	32.5763	0.18102	0
AAEL008384	ATP-binding cassette sub-family A member 3	0	0	0	14.2916	0	0.0794471
AAEL027937	E3 ubiquitin-protein ligase TRAIP	0	0	0.0843674	15.0748	0	0
AAEL009235	cold shock domain-containing protein CG9705, transcript variant X1	0.523516	0.556149	0.421837	105.656	0.601442	0.412108
AAEL012388	protein bric-a-brac 1, transcript variant X1	0.214518	0.0860478	0	59.9459	0.34182	0.189222
AAEL023635	protein RCC2 homolog	0.323816	0.0993352	0.0843674	56.4581	0.263218	0
AAEL000584	transcription factor SOX-3	0.161908	0.258143	0.0843674	44.597	0.106014	0
AAEL019434	dual specificity protein phosphatase MPK-4	0.090402	0.172096	0.308887	52.4592	0.212028	0.0802814
AAEL013204	uncharacterized LOC5577468	0.0715059	0	0.238811	39.8545	0	0.0439158
AAEL005049	RNA-binding protein squid	0.535305	1.34736	1.38051	229.957	0.570473	0.210663
AAEL003687	histone H2A	0	0	0.253102	41.9069	0	0.0363656
AAEL003706	histone H2A	0	0	0.253102	41.9069	0	0.0363656
AAEL013025	putative helicase MOV-10	0.0794395	0	0.168735	29.8772	0.18102	0.036209
AAEL006340	centrosomal protein of 135 kDa, transcript variant X3	0.0715059	0	0.0784231	12.9097	0.0786019	0.0725747
AAEL018263	protein ovarian tumor locus, transcript variant X2	0.543238	0.540062	0	87.1583	0.307255	0
AAEL002281	uncharacterized LOC5574198, transcript variant X1	0.249281	0.468702	0.381366	96.0794	0.601481	0.247029
AAEL009990	uncharacterized LOC5572712	0	0	0	28.6818	0.18102	0
AAEL002006	protein nessun dorma, transcript variant X1	0.682788	0.56332	0.430582	106.994	0.210536	0.244136
AAEL022755	histone H2A	0	0.218268	0	34.1428	0	0
AAEL009562	uncharacterized LOC5572147	0	0	0	6.86523	0	0.0439158
AAEL004318	uncharacterized LOC5564560, transcript variant X1	0.591993	0.169296	0.0784231	92.5404	0	0.27027
AAEL009227	kinesin-like protein KIF18A, transcript variant X1	0.0715059	0.170696	0.302943	72.0396	0.468055	0.35805
AAEL005943	serine/threonine-protein kinase stk11	0.158879	0.0993352	0.0843674	24.4377	0	0.0413241
AAEL005469	zinc finger CCCH domain-containing protein 18	0.50462	0.253945	0.636871	96.4228	0.106014	0.246195
AAEL000889	glutactin	0.158879	0	0	23.9505	0	0.0363656
AAEL007726	protein MMS22-like	0.249281	0.0860478	0.232867	38.8958	0.259622	0.197164
AAEL026343	Werner syndrome ATP-dependent helicase-like	0.663499	0.172096	0.570336	99.1848	0.184616	0.0789159
AAEL019893	uncharacterized LOC5568235, transcript variant X2	0.0794395	0	0	11.8389	0.0786019	0
AAEL018215	dedicator of cytokinesis protein 3, transcript variant X5	1.09441	0.483389	0.50026	162.152	1.06231	0.854871
AAEL009799	uncharacterized LOC5572408	0	0.270031	0.0843674	38.2615	0	0.0439158
AAEL024111	lncRNA	0.233414	0	0	32.7768	0.0786019	0
AAEL007875	uncharacterized LOC5569746	2.5047	0.908029	1.66459	348.747	1.44592	0.833493
AAEL011743	uncharacterized LOC5575281, transcript variant X1	0	0	0	14.2446	0.102418	0.0439158
AAEL007013	polyadenylate-binding protein 2	0.090402	0.085348	0.207946	28.7714	0	0.0426199
AAEL022577	polyadenylate-binding protein 2-like	0.090402	0.085348	0.207946	28.7714	0	0.0426199
AAEL004976	uncharacterized LOC5565767	2.2335	0.854155	1.18457	307.731	0.683679	0.812514
AAEL024562	protein yellow, transcript variant X1	3.42134	0.354679	0.745015	467.768	0.287034	0.829477
AAEL005893	protein lin-54 homolog	0.0966258	0	0	13.089	0	0
AAEL007661	ras-related protein Rab-40C, transcript variant X2	0.25231	0.169296	0.154444	33.9332	0	0.120083
AAEL022590	kinesin-like protein subito, transcript variant X2	0.860996	0.339992	1.32118	175.083	0.864699	0.704556
AAEL020862	lncRNA	0.0715059	0	0.154444	20.1683	0.0786019	0.0776897
AAEL005035	ubiA prenyltransferase domain-containing protein 1 homolog	0.161908	0.172096	0.443095	57.471	0.283439	0.19418
AAEL023615	uncharacterized LOC110675714	0.090402	0.0846482	0	13.2553	0.102418	0.0439158
AAEL021832	lncRNA	0	0	0	5.47101	0	0.0425503
AAEL010568	chromosome-associated kinesin KIF4A	1.08868	0.369366	0.797259	139.905	0.59429	0.316256
AAEL009789	inner centromere protein	0.331749	0.525375	0.218575	67.048	0	0.208463
AAEL009471	syntaxin-4, transcript variant X1	0.0794395	0.0993352	0.0843674	12.6177	0	0
AAEL015127	uncharacterized LOC5566361	0	0.0993352	0.0843674	12.7964	0.102418	0
AAEL006830	protein yellow	2.83155	0.0860478	0.421837	352.714	0	0.295746
AAEL027228	lncRNA	0.271206	0.270031	0.168735	68.6931	0.519244	0.553204
AAEL002422	cytoplasmic polyadenylation element-binding protein 1, transcript variant X12	3.02634	0.357479	0.674939	374.815	0.102418	0.116647
AAEL021283	mantle protein-like	0.0715059	0	0	8.83107	0	0.0413241
AAEL024296	uncharacterized LOC110675672	0	0	0	9.6937	0.0786019	0.0439158
AAEL019337	-	0	0.0993352	0	12.1388	0	0
AAEL010579	lipid storage droplets surface-binding protein 2-like	0.152452	0	0	35.1437	0.288911	0.144673
AAEL003088	augmin complex subunit dgt5	0.63364	0.569437	0.317234	76.1263	0.499063	0.232756
AAEL027343	uncharacterized LOC110674428	0.0715059	0	0	14.0645	0.106014	0.118404
AAEL021402	lateral signaling target protein 2 homolog	0.84647	1.53462	1.3092	182.131	1.13202	0.981558
AAEL003893	DNA repair protein complementing XP-C cells homolog	1.67241	0.454015	1.05036	197.796	0.625259	1.17173
AAEL006827	cytochrome P450 CYP12A2, transcript variant X1	0.474761	0	0.148499	55.7753	0.106014	0.397389
AAEL005484	sorting nexin-27, transcript variant X1	0.169841	0.540062	0.395657	63.324	0.283439	0.0725747
AAEL003885	programmed cell death protein 2-like	0.342712	0.342792	0.308887	39.5663	0.263218	0.115656
AAEL021387	polycomb protein Pcl, transcript variant X1	0.312853	0.342792	0.77462	89.0341	0.157204	0.192737
AAEL003321	uncharacterized LOC5577774	0	0	0.0784231	9.00622	0	0.0363656
AAEL014440	uncharacterized LOC5564426	0.463799	0.694672	0.968396	135.039	1.18274	0.113899
AAEL007098	glycerol-3-phosphate phosphatase, transcript variant X3	0	0	0.0700762	11.5909	0.102418	0
AAEL009880	aurora kinase C	0.81632	0.568037	0.38731	90.974	0.522879	0.319995
AAEL009097	cathepsin M	0.214518	0.0993352	0	23.8534	0	0
AAEL027312	lncRNA	0	0.00518619	0.245463	27.291	0.140356	0.0977944
AAEL007321	lysM and putative peptidoglycan-binding domain-containing protein 3	0.0794395	0	0.148499	16.4061	0	0.0802814
AAEL023532	putative helicase MOV-10, transcript variant X3	0.180804	0.258143	0.154444	78.2588	0.204837	0.715934
AAEL006999	uncharacterized LOC5579356	0	0	0.154444	16.877	0	0.0727313
AAEL002820	uncharacterized LOC5576232	0.30492	0.170696	0.0700762	33.0794	0.184616	0.0878316
AAEL009238	uncharacterized LOC5571717	0.32872	0.183983	0.0700762	35.3363	0	0.0878316
AAEL022475	uncharacterized LOC110676897	0	0	0	9.28469	0	0.086466
AAEL021523	lncRNA	0	0.0846482	0	9.06073	0.0786019	0.0802814
AAEL021451	lncRNA	0.0715059	0	0	11.1273	0.106014	0
AAEL026815	histone H2B	0	0.623622	0.775314	81.095	0	0.425277
AAEL026063	histone H2B	0	0.623622	0.775314	81.0626	0	0.425277
AAEL023413	zinc finger protein 260, transcript variant X4	4.06699	1.89442	4.26179	444.792	0.669296	1.56729
AAEL002921	protein Spindly	0.543238	0.456814	0.570336	58.845	0.212028	0.165365
AAEL022838	lncRNA	0.394031	0.346607	0.157961	40.6125	0	0.04322
AAEL027729	lncRNA	0.0715059	0	0	7.87019	0.0786019	0
AAEL003689	histone H4	0	0	0.0843674	8.38475	0	0.0439158
AAEL008088	caldesmon	0.161908	0.820582	0.238811	80.6856	0.102418	0.412254
AAEL025214	cytochrome P450 4c3	0	0	0.168735	16.5682	0	0.0439158
AAEL022056	V-type proton ATPase subunit B-like	0	0	0	23.1371	0.235812	0.0989996
AAEL020918	lncRNA	0.262318	0	0	37.56	0	0.382952
AAEL012659	serine/threonine-protein kinase Nek5	1.25141	0.0860478	0.477622	122.117	0	0.0802814
AAEL024300	uncharacterized LOC110681438	1.76782	0.696071	0.302943	171.708	1.28852	0.504777
AAEL012654	pancreatic triacylglycerol lipase, transcript variant X5	0.230385	0.0846482	0.238811	22.8023	0.0786019	0.115282
AAEL021111	lncRNA	0	0	0.0784231	10.054	0.106014	0.0439158
AAEL025884	uncharacterized LOC5566000	0.301891	0.0846482	0.238811	27.8941	0.212028	0.121449
AAEL011648	G1/S-specific cyclin-D2	0.260243	0.0846482	0	23.8764	0	0
AAEL007171	uncharacterized LOC5568858	0.323816	0.454015	0.550101	154.422	1.6876	0.806261
AAEL000338	cytochrome P450 4C1	0	0	0	9.09033	0.102418	0.0439158
AAEL026580	lncRNA	0	0	0	8.99985	0.102418	0.0363656
AAEL023904	lncRNA	0.143012	0	0.0700762	18.1964	0.102604	0.208545
AAEL024914	organic cation transporter protein	8.24641	9.93312	2.40618	862.338	0.877728	3.74145
AAEL021769	lncRNA	0.161908	0	0.0843674	13.7885	0.157204	0.0413241
AAEL022628	uncharacterized LOC110678777	0.0794395	0	0.874841	74.2618	0	0
AAEL001949	uncharacterized LOC5572996	0.271206	0.338593	0	28.3912	0	0
AAEL014076	ranBP-type and C3HC4-type zinc finger-containing protein 1	0	0	0	8.55912	0.102418	0
AAEL004073	myosin-1, transcript variant X2	0.312853	0.456814	0.704544	58.2507	0.208433	0.159041
AAEL010085	DNA polymerase epsilon subunit 4	0.768718	0.652685	1.60743	131.953	0.396645	0.153405
AAEL023919	uncharacterized LOC110679470, transcript variant X3	0.323816	0.0856792	0.0843674	38.4691	0.471782	0.038123
AAEL026250	histone H2A-like	0	0.207418	0.244941	19.5526	0.0414567	0.207256
AAEL006073	(E3-independent) E2 ubiquitin-conjugating enzyme UBE2O	1.31604	0.437928	1.29157	103.628	0.868295	0.721934
AAEL019484	hybrid signal transduction histidine kinase A, transcript variant X5	0.71308	0.0846482	0.651162	58.8628	0.747897	0.31502
AAEL026230	lncRNA	0.180804	0.344191	0.294596	36.4086	0.464459	0.165521
AAEL023087	lncRNA	0.173391	0.201194	0.161869	15.6764	0	0.0918673
AAEL013110	acidic repeat-containing protein	0.742938	0.170696	0.741473	83.7036	0.967079	1.08305
AAEL008377	uncharacterized LOC5570576	0.867054	0.298006	0.317234	66.3822	0.413269	0.193867
AAEL014084	kinesin-like protein Klp61F	1.11331	0.397341	0.482427	83.5797	0.157204	0.367112
AAEL011791	putative leucine-rich repeat-containing protein DDB_G0290503	2.55905	0.834618	0.574091	191.536	0.51553	0.363163
AAEL001074	cadherin-89D, transcript variant X1	0	0	0.168735	12.6261	0	0.0439158
AAEL012499	histone H2A-beta, sperm	2.13819	3.50901	1.30449	259.69	1.51737	0.619377
AAEL006142	Hermansky-Pudlak syndrome 5 protein homolog	0.323816	0.0846482	0.154444	23.941	0.18102	0.116647
AAEL020300	uncharacterized LOC110679126	0.090402	0	0	41.5021	0.566877	4.13241e-08
AAEL026486	Ca(2+)/calmodulin-responsive adenylate cyclase, transcript variant X1	1.03084	0.885653	0.395657	73.9096	0.389453	0.556865
AAEL008884	extensin-1	0.400226	0	0.156846	28.6012	0.106014	0.0425503
AAEL013575	protein king tubby 2	0.350645	0.341392	0.308887	24.6998	0	0.227641
AAEL017985	uncharacterized LOC110678890, transcript variant X1	0.0936224	0	0.0784231	7.18573	0.102418	0.038123
AAEL019900	nuclear mitotic apparatus protein 1, transcript variant X1	1.44318	0.925516	1.25224	138.437	1.98542	1.18827
AAEL019978	nose resistant to fluoxetine protein 6	0.0794395	0.0846482	0	5.87492	0	0
AAEL013803	BLOC-1-related complex subunit 5	0.169841	0.0993352	0.0843674	12.756	0.184616	0.0852398
AAEL012143	caspase	0.180804	0.270031	0.0843674	18.6092	0	0.146907
AAEL014072	histone acetyltransferase Tip60	0.0715059	0.271431	0.241214	18.5756	0	0.164548
AAEL019790	frizzled	0.63364	0.526775	0.253102	51.351	0.751493	0.276219
AAEL013254	jmjC domain-containing protein 4 homolog	0.0715059	0	0.0784231	5.35008	0	0.0743321
AAEL007544	ovarian-specific serine/threonine-protein kinase Lok, transcript variant X1	0	0	0.477622	32.416	0	0
AAEL000521	uncharacterized LOC5578482, transcript variant X2	0.145094	0	0	9.81618	0	0
AAEL008256	cyclin-J, transcript variant X1	1.30017	0.655484	0.16279	87.6107	0.444238	0.419247
AAEL017501	histidine-rich glycoprotein	0.158879	0	0	10.5584	0	0
AAEL026980	lncRNA	0	0.101731	0	6.69963	0	0
AAEL020308	lncRNA	0	0.0993352	0	6.73675	0.102418	0
AAEL024198	-	0.25231	0.258143	0.168735	18.5709	0.283439	0.132429
AAEL018312	structure-specific endonuclease subunit SLX1 homolog, transcript variant X1	0.365463	0.271431	0.140152	48.1152	0.488275	0.739773
AAEL019787	protein ovo, transcript variant X2	2.68853	1.36624	0.971938	174.607	0.413269	0.721117
AAEL023625	uncharacterized LOC5569196	2.18882	0.740133	0.57628	140.438	1.43877	0.403461
AAEL011101	U4/U6.U5 small nuclear ribonucleoprotein 27 kDa protein	0.312853	0.0993352	0.88757	61.3651	0.287034	0.958945
AAEL004555	uncharacterized LOC5565038	0.150945	0	0	24.986	0.393049	0.0425503
AAEL011098	nucleoside diphosphate kinase 7	0.143012	0.0860478	0	9.06302	0	0
AAEL027353	lncRNA	6.30053	3.27676	4.62268	395.646	2.20689	2.58217
AAEL002404	tyrosine-protein kinase receptor torso, transcript variant X7	1.54945	0.468702	1.09185	97.0823	0.259622	0.218213
AAEL000397	chromatin modification-related protein EAF1, transcript variant X2	0.0234315	0.221508	0.323941	20.1223	0.175494	0.295135
AAEL005433	protein zwilch	0.754727	0.19867	0	46.8627	0	0.0851005
AAEL004492	cyclin-dependent kinases regulatory subunit	1.04483	0.839468	2.76239	171.28	0.314447	0.11649
AAEL025243	lncRNA	0	0	0	6.51086	0.106014	0
AAEL005212	uncharacterized LOC5563800	0.30492	0.19867	0	99.4529	0.0786019	1.63057
AAEL024452	lncRNA	1.5078	0.538663	0.869737	112.499	1.84844	1.80004
AAEL014314	DNA primase small subunit	0.949522	1.33474	1.63361	99.3967	0.18102	0.153405
AAEL010808	leucine-rich repeat protein 1	0.647632	0.0860478	0.395657	39.3872	0.102418	0.279673
AAEL013006	uncharacterized LOC5577109	0.878016	0.442127	0.38731	52.948	0.0786019	0.271652
AAEL026865	lncRNA	0.0794395	0	0	7.12857	0.0786019	0.118404
AAEL018031	transcription factor btd, transcript variant X1	0.983236	0.452615	0.168735	59.1006	0	0.0439158
AAEL008320	chromosome transmission fidelity protein 18 homolog	0.787614	0.994077	0.684309	59.4718	0.18102	0.199687
AAEL026212	histone H2A	0	0	0.373777	22.2317	0.0512091	0.172797
AAEL022745	histone H2A	0	0	0.373777	22.2268	0.0512091	0.172797
AAEL004885	trypsin	0	0.170696	0	10.1299	0	0
AAEL027826	lncRNA	0.158997	0	0.0784231	9.38395	0.157741	0.142066
AAEL023699	cell division cycle protein 20 homolog	0.625707	0.55335	1.11803	64.6653	0	0.273488
AAEL010803	protein claret segregational	0.632861	0.738733	0.468136	42.6413	0.758685	0.366295
AAEL014949	abhydrolase domain-containing protein 2	0.814444	0.838068	0.50026	49.3281	0.881285	0.328077
AAEL006655	uncharacterized LOC5568215	1.37658	1.25082	1.13233	76.7472	0.649075	0.595989
AAEL008510	sphingosine kinase 2, transcript variant X4	1.30017	1.29348	0.945758	158.803	2.90352	1.2324
AAEL024146	lncRNA	0.150945	0.172096	0.16279	9.39381	0	0
AAEL024982	uncharacterized LOC110674174	0	0.170696	0	9.23415	0.0786019	0.036209
AAEL018230	carbohydrate sulfotransferase 5, transcript variant X1	0.293957	0.19867	0.0843674	43.6063	0.806279	0.152178
AAEL021866	origin recognition complex subunit 5	0.613891	0.624711	0.697526	37.3739	0.416865	0.418231
AAEL026010	rapamycin-insensitive companion of mTOR	0	0.707959	0.325581	37.8053	0.204837	0.114369
AAEL007295	uncharacterized LOC5568990	1.18481	1.45229	1.04087	77.4038	1.25052	0.387622
AAEL014251	baculoviral IAP repeat-containing protein 5.2	0.896913	0.75342	0.61183	48.7646	0.915889	0.238253
AAEL008944	centriolar coiled-coil protein of 110 kDa, transcript variant X1	0.482695	0	0.771079	41.0309	0	0.123363
AAEL025664	uncharacterized LOC5575051	2.07484	1.62439	0.57628	110.316	0.915889	0.980696
AAEL026814	lncRNA	0	0.258143	0.232867	13.7082	0.102418	0.167139
AAEL002751	zinc finger protein 62, transcript variant X1	0.25231	0	0.572739	30.3167	0	0.123363
AAEL022585	uncharacterized LOC110680464	0.214518	0	0	11.314	0	0
AAEL024288	lncRNA	0.161908	0.382654	0.605886	31.5372	0	0.266616
AAEL026714	uncharacterized LOC5576006	2.0171	0.556149	0.232867	104.952	0.912293	0.404391
AAEL002219	palmitoyltransferase ZDHHC3	1.05882	0.169296	0.558448	54.764	0.208433	0.785917
AAEL004543	trypsin-1	0.0715059	0	0	5.471	0.106014	0.0425503
AAEL020106	lncRNA	27.8131	14.2291	20.813	1423.49	13.2606	12.4927
AAEL021423	lncRNA	0.150945	0	0	7.66018	0	0
AAEL028209	uncharacterized LOC110675391	0.170629	0.256744	0.22452	12.9952	0.106014	0.0787593
AAEL012371	protein tramtrack, beta isoform, transcript variant X1	1.05579	0.908029	0.415893	53.3808	0.597846	0.384325
