# Supplementary material for: A transcriptomic atlas of Aedes aegypti reveals detailed functional organization of major body parts and gut regional specializations in sugar-fed and blood-fed adult females
Source: eLife. 2022 Apr 26;11:e76132. doi: 10.7554/eLife.76132 (PMC9113746; doi:10.7554/eLife.76132)
Supplement: Supplementary file 2. [file elife-76132-supp2.xlsx]

## Sheet: Sheet1
Species	Sample	Regulated:	Criteria	Comparison	GO.ID	Type	Term	Category Size	# of Genes	classic Fisher p value
Aedes	Abdomen	Up	DESeq2: Min 5x FC, padj < 0.05	Whole Body	GO:0004568	MF	chitinase activity	23	3	0.00496
Aedes	Abdomen	Up	DESeq2: Min 5x FC, padj < 0.05	Whole Body	GO:0006952	BP	defense response	23	4	0.00038
Aedes	Abdomen	Up	DESeq2: Min 5x FC, padj < 0.05	Whole Body	GO:0008199	MF	ferric iron binding	8	2	0.00613
Aedes	Abdomen	Up	DESeq2: Min 5x FC, padj < 0.05	Whole Body	GO:0006629	BP	lipid metabolic process	290	10	0.01394
Aedes	Abdomen	Up	DESeq2: Min 5x FC, padj < 0.05	Whole Body	GO:0006869	BP	lipid transport	51	7	1.2e-05
Aedes	Abdomen	Up	DESeq2: Min 5x FC, padj < 0.05	Whole Body	GO:0005319	MF	lipid transporter activity	27	6	2.6e-06
Aedes	Abdomen	Up	DESeq2: Min 5x FC, padj < 0.05	Whole Body	GO:0008233	MF	peptidase activity	652	28	4.9e-07
Aedes	Ant MG	Up	DESeq2: Min 5x FC, padj < 0.05	Whole Gut	GO:0015701	BP	bicarbonate transport	2	1	0.0302
Aedes	Ant MG	Up	DESeq2: Min 5x FC, padj < 0.05	Whole Gut	GO:0007589	BP	body fluid secretion (diuretic hormone)	1	1	0.0152
Aedes	Ant MG	Up	DESeq2: Min 5x FC, padj < 0.05	Whole Gut	GO:0005975	BP	carbohydrate metabolic process	232	14	8.9e-06
Aedes	Ant MG	Up	DESeq2: Min 5x FC, padj < 0.05	Whole Gut	GO:0006952	BP	defense response	23	2	0.047
Aedes	Ant MG	Up	DESeq2: Min 5x FC, padj < 0.05	Whole Gut	GO:0008613	MF	diuretic hormone activity	1	1	0.01247
Aedes	Ant MG	Up	DESeq2: Min 5x FC, padj < 0.05	Whole Gut	GO:0020037	MF	heme binding	194	12	5e-06
Aedes	Ant MG	Up	DESeq2: Min 5x FC, padj < 0.05	Whole Gut	GO:0009253	BP	peptidoglycan catabolic process	11	2	0.0115
Aedes	Ant MG	Up	DESeq2: Min 5x FC, padj < 0.05	Whole Gut	GO:0061783	MF	peptidoglycan muralytic activity	17	2	0.01856
Aedes	BF 24 hr Ant MG	Down	DESeq2: Min 2x FC, padj < 0.05	SF Ant MG	GO:0006816	BP	calcium ion transport	22	4	0.00648
Aedes	BF 24 hr Ant MG	Down	DESeq2: Min 2x FC, padj < 0.05	SF Ant MG	GO:0006520	BP	cellular amino acid metabolic process	264	19	0.00211
Aedes	BF 24 hr Ant MG	Down	DESeq2: Min 2x FC, padj < 0.05	SF Ant MG	GO:0035076	BP	ecdysone receptor-mediated signaling pat...	1	1	0.03497
Aedes	BF 24 hr Ant MG	Down	DESeq2: Min 2x FC, padj < 0.05	SF Ant MG	GO:0004707	MF	MAP kinase activity	5	2	0.01037
Aedes	BF 24 hr Ant MG	Down	DESeq2: Min 2x FC, padj < 0.05	SF Ant MG	GO:0035278	BP	miRNA mediated inhibition of translation	3	2	0.00357
Aedes	BF 24 hr Ant MG	Down	DESeq2: Min 2x FC, padj < 0.05	SF Ant MG	GO:0006730	BP	one-carbon metabolic process	10	2	0.04553
Aedes	BF 24 hr Ant MG	Down	DESeq2: Min 2x FC, padj < 0.05	SF Ant MG	GO:0006813	BP	potassium ion transport	40	6	0.00242
Aedes	BF 24 hr Ant MG	Down	DESeq2: Min 2x FC, padj < 0.05	SF Ant MG	GO:0003707	MF	steroid hormone receptor activity	17	3	0.01765
Aedes	BF 24 hr Ant MG	Down	DESeq2: Min 2x FC, padj < 0.05	SF Ant MG	GO:0006351	BP	transcription, DNA-templated	616	36	0.0013
Aedes	BF 24 hr Ant MG	Up	DESeq2: Min 2x FC, padj < 0.05	SF Ant MG	GO:0016209	MF	antioxidant activity	33	4	0.00566
Aedes	BF 24 hr Ant MG	Up	DESeq2: Min 2x FC, padj < 0.05	SF Ant MG	GO:0007589	BP	body fluid secretion (diuretic hormone)	1	1	0.02864
Aedes	BF 24 hr Ant MG	Up	DESeq2: Min 2x FC, padj < 0.05	SF Ant MG	GO:0005975	BP	carbohydrate metabolic process	232	19	3.1e-05
Aedes	BF 24 hr Ant MG	Up	DESeq2: Min 2x FC, padj < 0.05	SF Ant MG	GO:0006952	BP	defense response	23	10	2.4e-10
Aedes	BF 24 hr Ant MG	Up	DESeq2: Min 2x FC, padj < 0.05	SF Ant MG	GO:0008613	MF	diuretic hormone activity	1	1	0.02201
Aedes	BF 24 hr Ant MG	Up	DESeq2: Min 2x FC, padj < 0.05	SF Ant MG	GO:0006869	BP	lipid transport	51	5	0.01476
Aedes	BF 24 hr Ant MG	Up	DESeq2: Min 2x FC, padj < 0.05	SF Ant MG	GO:0005319	MF	lipid transporter activity	27	4	0.00269
Aedes	BF 24 hr Ant MG	Up	DESeq2: Min 2x FC, padj < 0.05	SF Ant MG	GO:0003796	MF	lysozyme activity	6	3	0.0002
Aedes	BF 24 hr Ant MG	Up	DESeq2: Min 2x FC, padj < 0.05	SF Ant MG	GO:0008233	MF	peptidase activity	652	37	7.4e-08
Aedes	BF 24 hr Ant MG	Up	DESeq2: Min 2x FC, padj < 0.05	SF Ant MG	GO:0061783	MF	peptidoglycan muralytic activity	17	4	0.00043
Aedes	BF 24 hr Ant MG	Up	DESeq2: Min 2x FC, padj < 0.05	SF Ant MG	GO:0004601	MF	peroxidase activity	21	3	0.01043
Aedes	BF 24 hr Gut	Down	DESeq2: Min 2x FC, padj < 0.05	BF 6 hr Gut	GO:1901606	BP	alpha-amino acid catabolic process	38	11	4.2e-05
Aedes	BF 24 hr Gut	Down	DESeq2: Min 2x FC, padj < 0.05	BF 6 hr Gut	GO:0006754	BP	ATP biosynthetic process	20	6	0.00202
Aedes	BF 24 hr Gut	Down	DESeq2: Min 2x FC, padj < 0.05	BF 6 hr Gut	GO:0006520	BP	cellular amino acid metabolic process	264	36	9.2e-05
Aedes	BF 24 hr Gut	Down	DESeq2: Min 2x FC, padj < 0.05	BF 6 hr Gut	GO:0045333	BP	cellular respiration	83	14	0.00188
Aedes	BF 24 hr Gut	Down	DESeq2: Min 2x FC, padj < 0.05	BF 6 hr Gut	GO:0000398	BP	mRNA splicing, via spliceosome	50	8	0.02304
Aedes	BF 24 hr Gut	Down	DESeq2: Min 2x FC, padj < 0.05	BF 6 hr Gut	GO:0015833	BP	peptide transport	256	39	3.3e-06
Aedes	BF 24 hr Gut	Down	DESeq2: Min 2x FC, padj < 0.05	BF 6 hr Gut	GO:0006457	BP	protein folding	66	21	2.1e-09
Aedes	BF 24 hr Gut	Down	DESeq2: Min 2x FC, padj < 0.05	BF 6 hr Gut	GO:0022613	BP	ribonucleoprotein complex biogenesis	219	55	1.6e-17
Aedes	BF 24 hr Gut	Down	DESeq2: Min 2x FC, padj < 0.05	BF 6 hr Gut	GO:0006614	BP	SRP-dependent cotranslational protein ta...	10	7	8.6e-07
Aedes	BF 24 hr Gut	Down	DESeq2: Min 2x FC, padj < 0.05	BF 6 hr Gut	GO:0006412	BP	translation	253	57	8.2e-16
Aedes	BF 24 hr Gut	Up	DESeq2: Min 2x FC, padj < 0.05	BF 6 hr Gut	GO:0005975	BP	carbohydrate metabolic process	232	29	0.00153
Aedes	BF 24 hr Gut	Up	DESeq2: Min 2x FC, padj < 0.05	BF 6 hr Gut	GO:0006520	BP	cellular amino acid metabolic process	264	30	0.00545
Aedes	BF 24 hr Gut	Up	DESeq2: Min 2x FC, padj < 0.05	BF 6 hr Gut	GO:0006952	BP	defense response	21	7	0.00039
Aedes	BF 24 hr Gut	Up	DESeq2: Min 2x FC, padj < 0.05	BF 6 hr Gut	GO:0020037	MF	heme binding	194	25	0.00047
Aedes	BF 24 hr Gut	Up	DESeq2: Min 2x FC, padj < 0.05	BF 6 hr Gut	GO:0016042	BP	lipid catabolic process	53	11	0.00091
Aedes	BF 24 hr Gut	Up	DESeq2: Min 2x FC, padj < 0.05	BF 6 hr Gut	GO:0006869	BP	lipid transport	51	8	0.02421
Aedes	BF 24 hr Gut	Up	DESeq2: Min 2x FC, padj < 0.05	BF 6 hr Gut	GO:0035278	BP	miRNA mediated inhibition of translation	3	2	0.01402
Aedes	BF 24 hr Gut	Up	DESeq2: Min 2x FC, padj < 0.05	BF 6 hr Gut	GO:0009253	BP	peptidoglycan catabolic process	11	5	0.00054
Aedes	BF 24 hr Gut	Up	DESeq2: Min 2x FC, padj < 0.05	BF 6 hr Gut	GO:0061783	MF	peptidoglycan muralytic activity	17	5	0.00316
Aedes	BF 24 hr Gut	Up	DESeq2: Min 2x FC, padj < 0.05	BF 6 hr Gut	GO:0003707	MF	steroid hormone receptor activity	17	5	0.00316
Aedes	BF 24 hr Gut	Up	DESeq2: Min 2x FC, padj < 0.05	BF 6 hr Gut	GO:0006767	BP	water-soluble vitamin metabolic process	35	6	0.03276
Aedes	BF 24 hr Post MG	Down	DESeq2: Min 2x FC, padj < 0.05	SF Post MG	GO:0006754	BP	ATP biosynthetic process	20	4	0.02677
Aedes	BF 24 hr Post MG	Down	DESeq2: Min 2x FC, padj < 0.05	SF Post MG	GO:0016052	BP	carbohydrate catabolic process	30	5	0.02871
Aedes	BF 24 hr Post MG	Down	DESeq2: Min 2x FC, padj < 0.05	SF Post MG	GO:0006520	BP	cellular amino acid metabolic process	264	25	0.01157
Aedes	BF 24 hr Post MG	Down	DESeq2: Min 2x FC, padj < 0.05	SF Post MG	GO:0006936	BP	muscle contraction	2	2	0.00344
Aedes	BF 24 hr Post MG	Down	DESeq2: Min 2x FC, padj < 0.05	SF Post MG	GO:0015833	BP	peptide transport	256	23	0.02641
Aedes	BF 24 hr Post MG	Down	DESeq2: Min 2x FC, padj < 0.05	SF Post MG	GO:0006457	BP	protein folding	66	10	0.00474
Aedes	BF 24 hr Post MG	Down	DESeq2: Min 2x FC, padj < 0.05	SF Post MG	GO:0022613	BP	ribonucleoprotein complex biogenesis	219	51	2.3e-18
Aedes	BF 24 hr Post MG	Down	DESeq2: Min 2x FC, padj < 0.05	SF Post MG	GO:0006412	BP	translation	253	36	4.8e-07
Aedes	BF 24 hr Post MG	Up	DESeq2: Min 2x FC, padj < 0.05	SF Post MG	GO:0005975	BP	carbohydrate metabolic process	232	49	4.1e-10
Aedes	BF 24 hr Post MG	Up	DESeq2: Min 2x FC, padj < 0.05	SF Post MG	GO:0006952	BP	defense response	21	9	2e-05
Aedes	BF 24 hr Post MG	Up	DESeq2: Min 2x FC, padj < 0.05	SF Post MG	GO:0008199	MF	ferric iron binding	8	3	0.013
Aedes	BF 24 hr Post MG	Up	DESeq2: Min 2x FC, padj < 0.05	SF Post MG	GO:0020037	MF	heme binding	194	30	1.3e-05
Aedes	BF 24 hr Post MG	Up	DESeq2: Min 2x FC, padj < 0.05	SF Post MG	GO:0032367	BP	intracellular cholesterol transport	10	3	0.04356
Aedes	BF 24 hr Post MG	Up	DESeq2: Min 2x FC, padj < 0.05	SF Post MG	GO:0016042	BP	lipid catabolic process	53	16	3.2e-06
Aedes	BF 24 hr Post MG	Up	DESeq2: Min 2x FC, padj < 0.05	SF Post MG	GO:0006629	BP	lipid metabolic process	290	39	0.0015
Aedes	BF 24 hr Post MG	Up	DESeq2: Min 2x FC, padj < 0.05	SF Post MG	GO:0006869	BP	lipid transport	51	9	0.02244
Aedes	BF 24 hr Post MG	Up	DESeq2: Min 2x FC, padj < 0.05	SF Post MG	GO:0005319	MF	lipid transporter activity	27	5	0.03138
Aedes	BF 24 hr Post MG	Up	DESeq2: Min 2x FC, padj < 0.05	SF Post MG	GO:0008233	MF	peptidase activity	652	93	8.5e-13
Aedes	BF 24 hr Post MG	Up	DESeq2: Min 2x FC, padj < 0.05	SF Post MG	GO:0009253	BP	peptidoglycan catabolic process	11	4	0.00955
Aedes	BF 24 hr Post MG	Up	DESeq2: Min 2x FC, padj < 0.05	SF Post MG	GO:0061783	MF	peptidoglycan muralytic activity	17	6	0.00058
Aedes	BF 24 hr Post MG	Up	DESeq2: Min 2x FC, padj < 0.05	SF Post MG	GO:0004601	MF	peroxidase activity	21	4	0.04802
Aedes	BF 24 hr Post MG	Up	DESeq2: Min 2x FC, padj < 0.05	SF Post MG	GO:0043248	BP	proteasome assembly	8	5	0.00017
Aedes	BF 24 hr Post MG	Up	DESeq2: Min 2x FC, padj < 0.05	SF Post MG	GO:0004767	MF	sphingomyelin phosphodiesterase activity	4	2	0.02457
Aedes	BF 24 hr Post MG	Up	DESeq2: Min 2x FC, padj < 0.05	SF Post MG	GO:0042364	BP	water-soluble vitamin biosynthetic proce...	12	4	0.01341
Aedes	BF 24 hr Post MG	Up	DESeq2: Min 2x FC, padj < 0.05	SF Post MG	GO:0006767	BP	water-soluble vitamin metabolic process	35	10	0.00038
Aedes	BF 48 hr Gut	Down	DESeq2: Min 2x FC, padj < 0.05	BF 24 hr Gut	GO:0005975	BP	carbohydrate metabolic process	232	28	8.5e-06
Aedes	BF 48 hr Gut	Down	DESeq2: Min 2x FC, padj < 0.05	BF 24 hr Gut	GO:0004096	MF	catalase activity	1	1	0.03985
Aedes	BF 48 hr Gut	Down	DESeq2: Min 2x FC, padj < 0.05	BF 24 hr Gut	GO:0006952	BP	defense response	21	6	0.0004
Aedes	BF 48 hr Gut	Down	DESeq2: Min 2x FC, padj < 0.05	BF 24 hr Gut	GO:0008199	MF	ferric iron binding	8	3	0.00303
Aedes	BF 48 hr Gut	Down	DESeq2: Min 2x FC, padj < 0.05	BF 24 hr Gut	GO:0020037	MF	heme binding	194	26	4.9e-08
Aedes	BF 48 hr Gut	Down	DESeq2: Min 2x FC, padj < 0.05	BF 24 hr Gut	GO:0032367	BP	intracellular cholesterol transport	10	4	0.00097
Aedes	BF 48 hr Gut	Down	DESeq2: Min 2x FC, padj < 0.05	BF 24 hr Gut	GO:0016042	BP	lipid catabolic process	53	10	0.00022
Aedes	BF 48 hr Gut	Down	DESeq2: Min 2x FC, padj < 0.05	BF 24 hr Gut	GO:0006629	BP	lipid metabolic process	290	32	1.3e-05
Aedes	BF 48 hr Gut	Down	DESeq2: Min 2x FC, padj < 0.05	BF 24 hr Gut	GO:0006869	BP	lipid transport	51	10	0.00016
Aedes	BF 48 hr Gut	Down	DESeq2: Min 2x FC, padj < 0.05	BF 24 hr Gut	GO:0005319	MF	lipid transporter activity	27	5	0.00383
Aedes	BF 48 hr Gut	Down	DESeq2: Min 2x FC, padj < 0.05	BF 24 hr Gut	GO:0007041	BP	lysosomal transport	1	1	0.04937
Aedes	BF 48 hr Gut	Down	DESeq2: Min 2x FC, padj < 0.05	BF 24 hr Gut	GO:0008233	MF	peptidase activity	652	63	2.5e-11
Aedes	BF 48 hr Gut	Down	DESeq2: Min 2x FC, padj < 0.05	BF 24 hr Gut	GO:0009253	BP	peptidoglycan catabolic process	11	4	0.00146
Aedes	BF 48 hr Gut	Down	DESeq2: Min 2x FC, padj < 0.05	BF 24 hr Gut	GO:0061783	MF	peptidoglycan muralytic activity	17	4	0.00391
Aedes	BF 48 hr Gut	Down	DESeq2: Min 2x FC, padj < 0.05	BF 24 hr Gut	GO:0006767	BP	water-soluble vitamin metabolic process	35	8	0.00024
Aedes	BF 48 hr Gut	Up	DESeq2: Min 2x FC, padj < 0.05	BF 24 hr Gut	GO:1901606	BP	alpha-amino acid catabolic process	38	5	0.02741
Aedes	BF 48 hr Gut	Up	DESeq2: Min 2x FC, padj < 0.05	BF 24 hr Gut	GO:0006754	BP	ATP biosynthetic process	20	14	3.5e-15
Aedes	BF 48 hr Gut	Up	DESeq2: Min 2x FC, padj < 0.05	BF 24 hr Gut	GO:0016052	BP	carbohydrate catabolic process	30	10	4.3e-07
Aedes	BF 48 hr Gut	Up	DESeq2: Min 2x FC, padj < 0.05	BF 24 hr Gut	GO:0006520	BP	cellular amino acid metabolic process	264	25	0.00035
Aedes	BF 48 hr Gut	Up	DESeq2: Min 2x FC, padj < 0.05	BF 24 hr Gut	GO:0045333	BP	cellular respiration	83	34	9.7e-25
Aedes	BF 48 hr Gut	Up	DESeq2: Min 2x FC, padj < 0.05	BF 24 hr Gut	GO:0006811	BP	ion transport	347	34	1.4e-05
Aedes	BF 48 hr Gut	Up	DESeq2: Min 2x FC, padj < 0.05	BF 24 hr Gut	GO:0015833	BP	peptide transport	256	21	0.00595
Aedes	BF 48 hr Gut	Up	DESeq2: Min 2x FC, padj < 0.05	BF 24 hr Gut	GO:0006457	BP	protein folding	66	11	0.00016
Aedes	BF 48 hr Gut	Up	DESeq2: Min 2x FC, padj < 0.05	BF 24 hr Gut	GO:0022613	BP	ribonucleoprotein complex biogenesis	219	60	1e-30
Aedes	BF 48 hr Gut	Up	DESeq2: Min 2x FC, padj < 0.05	BF 24 hr Gut	GO:0006814	BP	sodium ion transport	67	8	0.01041
Aedes	BF 48 hr Gut	Up	DESeq2: Min 2x FC, padj < 0.05	BF 24 hr Gut	GO:0006412	BP	translation	253	64	1e-30
Aedes	BF 48 hr Gut	Down	DESeq2: Min 2x FC, padj < 0.05	SF Gut	GO:0015171	MF	amino acid transmembrane transporter act...	12	2	0.00255
Aedes	BF 48 hr Gut	Down	DESeq2: Min 2x FC, padj < 0.05	SF Gut	GO:0020037	MF	heme binding	194	4	0.03518
Aedes	BF 48 hr Gut	Down	DESeq2: Min 2x FC, padj < 0.05	SF Gut	GO:0008233	MF	peptidase activity	652	20	1.6e-09
Aedes	BF 48 hr Gut	Up	DESeq2: Min 2x FC, padj < 0.05	SF Gut	GO:0006754	BP	ATP biosynthetic process	45	4	0.00124
Aedes	BF 48 hr Gut	Up	DESeq2: Min 2x FC, padj < 0.05	SF Gut	GO:0016052	BP	carbohydrate catabolic process	30	3	0.00377
Aedes	BF 48 hr Gut	Up	DESeq2: Min 2x FC, padj < 0.05	SF Gut	GO:0045333	BP	cellular respiration	83	5	0.00177
Aedes	BF 48 hr Gut	Up	DESeq2: Min 2x FC, padj < 0.05	SF Gut	GO:0000398	BP	mRNA splicing, via spliceosome	50	3	0.01565
Aedes	BF 48 hr Gut	Up	DESeq2: Min 2x FC, padj < 0.05	SF Gut	GO:0022613	BP	ribonucleoprotein complex biogenesis	220	24	7.5e-19
Aedes	BF 48 hr Gut	Up	DESeq2: Min 2x FC, padj < 0.05	SF Gut	GO:0006412	BP	translation	253	29	1.2e-23
Aedes	BF 6 hr Gut	Down	DESeq2: Min 2x FC, padj < 0.05	SF Gut	GO:0006520	BP	cellular amino acid metabolic process	264	33	0.00312
Aedes	BF 6 hr Gut	Down	DESeq2: Min 2x FC, padj < 0.05	SF Gut	GO:0035278	BP	miRNA mediated inhibition of translation	3	2	0.0166
Aedes	BF 6 hr Gut	Down	DESeq2: Min 2x FC, padj < 0.05	SF Gut	GO:0006730	BP	one-carbon metabolic process	10	4	0.00488
Aedes	BF 6 hr Gut	Down	DESeq2: Min 2x FC, padj < 0.05	SF Gut	GO:0006885	BP	regulation of pH	5	2	0.04991
Aedes	BF 6 hr Gut	Down	DESeq2: Min 2x FC, padj < 0.05	SF Gut	GO:0006351	BP	transcription, DNA-templated	616	75	1.9e-05
Aedes	BF 6 hr Gut	Up	DESeq2: Min 2x FC, padj < 0.05	SF Gut	GO:1901606	BP	alpha-amino acid catabolic process	38	12	1.4e-05
Aedes	BF 6 hr Gut	Up	DESeq2: Min 2x FC, padj < 0.05	SF Gut	GO:0015171	MF	amino acid transmembrane transporter act...	12	3	0.0306
Aedes	BF 6 hr Gut	Up	DESeq2: Min 2x FC, padj < 0.05	SF Gut	GO:0006520	BP	cellular amino acid metabolic process	264	31	0.00933
Aedes	BF 6 hr Gut	Up	DESeq2: Min 2x FC, padj < 0.05	SF Gut	GO:0008199	MF	ferric iron binding	8	4	0.00071
Aedes	BF 6 hr Gut	Up	DESeq2: Min 2x FC, padj < 0.05	SF Gut	GO:0032367	BP	intracellular cholesterol transport	10	3	0.03493
Aedes	BF 6 hr Gut	Up	DESeq2: Min 2x FC, padj < 0.05	SF Gut	GO:0006869	BP	lipid transport	51	9	0.01344
Aedes	BF 6 hr Gut	Up	DESeq2: Min 2x FC, padj < 0.05	SF Gut	GO:0005319	MF	lipid transporter activity	27	6	0.00432
Aedes	BF 6 hr Gut	Up	DESeq2: Min 2x FC, padj < 0.05	SF Gut	GO:0003796	MF	lysozyme activity	6	2	0.04497
Aedes	BF 6 hr Gut	Up	DESeq2: Min 2x FC, padj < 0.05	SF Gut	GO:0000398	BP	mRNA splicing, via spliceosome	50	11	0.00106
Aedes	BF 6 hr Gut	Up	DESeq2: Min 2x FC, padj < 0.05	SF Gut	GO:0008233	MF	peptidase activity	652	62	0.00012
Aedes	BF 6 hr Gut	Up	DESeq2: Min 2x FC, padj < 0.05	SF Gut	GO:0061783	MF	peptidoglycan muralytic activity	17	4	0.01573
Aedes	BF 6 hr Gut	Up	DESeq2: Min 2x FC, padj < 0.05	SF Gut	GO:0043248	BP	proteasome assembly	8	3	0.01827
Aedes	BF 6 hr Gut	Up	DESeq2: Min 2x FC, padj < 0.05	SF Gut	GO:0006457	BP	protein folding	66	10	0.02603
Aedes	BF 6 hr Gut	Up	DESeq2: Min 2x FC, padj < 0.05	SF Gut	GO:0004767	MF	sphingomyelin phosphodiesterase activity	4	2	0.01947
Aedes	BF 6 hr Gut	Up	DESeq2: Min 2x FC, padj < 0.05	SF Gut	GO:0006614	BP	SRP-dependent cotranslational protein ta...	10	5	0.00045
Aedes	BF 6 hr Gut	Up	DESeq2: Min 2x FC, padj < 0.05	SF Gut	GO:0006767	BP	water-soluble vitamin metabolic process	35	6	0.04583
Aedes	Crop	Up	DESeq2: Min 5x FC, padj < 0.05	Whole Gut	GO:0006816	BP	calcium ion transport	22	9	5e-05
Aedes	Crop	Up	DESeq2: Min 5x FC, padj < 0.05	Whole Gut	GO:0004198	MF	calcium-dependent cysteine-type endopept...	9	3	0.03768
Aedes	Crop	Up	DESeq2: Min 5x FC, padj < 0.05	Whole Gut	GO:0006030	BP	chitin metabolic process	126	20	0.00617
Aedes	Crop	Up	DESeq2: Min 5x FC, padj < 0.05	Whole Gut	GO:0004568	MF	chitinase activity	23	6	0.01224
Aedes	Crop	Up	DESeq2: Min 5x FC, padj < 0.05	Whole Gut	GO:0007186	BP	G protein-coupled receptor signaling pat...	253	39	0.0003
Aedes	Crop	Up	DESeq2: Min 5x FC, padj < 0.05	Whole Gut	GO:0008083	MF	growth factor activity	13	5	0.00361
Aedes	Crop	Up	DESeq2: Min 5x FC, padj < 0.05	Whole Gut	GO:0006811	BP	ion transport	347	50	0.00024
Aedes	Crop	Up	DESeq2: Min 5x FC, padj < 0.05	Whole Gut	GO:0006629	BP	lipid metabolic process	290	35	0.03011
Aedes	Crop	Up	DESeq2: Min 5x FC, padj < 0.05	Whole Gut	GO:0006936	BP	muscle contraction	2	2	0.00764
Aedes	Crop	Up	DESeq2: Min 5x FC, padj < 0.05	Whole Gut	GO:0008233	MF	peptidase activity	652	97	7.9e-08
Aedes	Crop	Up	DESeq2: Min 5x FC, padj < 0.05	Whole Gut	GO:0007602	BP	phototransduction	10	4	0.00794
Aedes	Crop	Up	DESeq2: Min 5x FC, padj < 0.05	Whole Gut	GO:0006813	BP	potassium ion transport	40	21	1.1e-12
Aedes	Crop	Up	DESeq2: Min 5x FC, padj < 0.05	Whole Gut	GO:0005044	MF	scavenger receptor activity	10	4	0.00799
Aedes	Crop	Up	DESeq2: Min 5x FC, padj < 0.05	Whole Gut	GO:0007271	BP	synaptic transmission, cholinergic	5	3	0.00583
Aedes	Crop	Up	DESeq2: Min 5x FC, padj < 0.05	Whole Gut	GO:0005245	MF	voltage-gated calcium channel activity	6	3	0.01095
Aedes	Crop	Up	DESeq2: Min 5x FC, padj < 0.05	Whole Gut	GO:0005249	MF	voltage-gated potassium channel activity	19	12	5.4e-09
Aedes	Gut	Up	DESeq2: Min 5x FC, padj < 0.05	Whole Body	GO:0006915	BP	apoptotic process	40	7	0.02168
Aedes	Gut	Up	DESeq2: Min 5x FC, padj < 0.05	Whole Body	GO:0015991	BP	ATP hydrolysis coupled proton transport	22	7	0.00061
Aedes	Gut	Up	DESeq2: Min 5x FC, padj < 0.05	Whole Body	GO:0005975	BP	carbohydrate metabolic process	232	29	0.00207
Aedes	Gut	Up	DESeq2: Min 5x FC, padj < 0.05	Whole Body	GO:0006030	BP	chitin metabolic process	126	19	0.00143
Aedes	Gut	Up	DESeq2: Min 5x FC, padj < 0.05	Whole Body	GO:0006952	BP	defense response	23	5	0.021
Aedes	Gut	Up	DESeq2: Min 5x FC, padj < 0.05	Whole Body	GO:0020037	MF	heme binding	194	40	5.4e-13
Aedes	Gut	Up	DESeq2: Min 5x FC, padj < 0.05	Whole Body	GO:0032367	BP	intracellular cholesterol transport	10	3	0.02986
Aedes	Gut	Up	DESeq2: Min 5x FC, padj < 0.05	Whole Body	GO:0006629	BP	lipid metabolic process	290	30	0.02477
Aedes	Gut	Up	DESeq2: Min 5x FC, padj < 0.05	Whole Body	GO:0006730	BP	one-carbon metabolic process	10	4	0.00383
Aedes	Gut	Up	DESeq2: Min 5x FC, padj < 0.05	Whole Body	GO:0008233	MF	peptidase activity	652	103	1.1e-22
Aedes	Gut	Up	DESeq2: Min 5x FC, padj < 0.05	Whole Body	GO:0009253	BP	peptidoglycan catabolic process	11	6	4.4e-05
Aedes	Gut	Up	DESeq2: Min 5x FC, padj < 0.05	Whole Body	GO:0061783	MF	peptidoglycan muralytic activity	17	7	2.2e-05
Aedes	Gut	Up	DESeq2: Min 5x FC, padj < 0.05	Whole Body	GO:0006885	BP	regulation of pH	5	2	0.04415
Aedes	Head	Up	DESeq2: Min 5x FC, padj < 0.05	Whole Body	GO:0015701	BP	bicarbonate transport	2	2	0.00622
Aedes	Head	Up	DESeq2: Min 5x FC, padj < 0.05	Whole Body	GO:0006816	BP	calcium ion transport	22	9	2.2e-05
Aedes	Head	Up	DESeq2: Min 5x FC, padj < 0.05	Whole Body	GO:0006821	BP	chloride transport	12	6	0.00014
Aedes	Head	Up	DESeq2: Min 5x FC, padj < 0.05	Whole Body	GO:0007186	BP	GPCR signaling pathway	253	80	1.5e-29
Aedes	Head	Up	DESeq2: Min 5x FC, padj < 0.05	Whole Body	GO:0006811	BP	ion transport	347	64	4.3e-11
Aedes	Head	Up	DESeq2: Min 5x FC, padj < 0.05	Whole Body	GO:0004970	MF	ionotropic glutamate receptor activity	55	10	0.01547
Aedes	Head	Up	DESeq2: Min 5x FC, padj < 0.05	Whole Body	GO:0005184	MF	neuropeptide hormone activity	11	6	0.00011
Aedes	Head	Up	DESeq2: Min 5x FC, padj < 0.05	Whole Body	GO:0005549	MF	odorant binding	198	38	1.1e-06
Aedes	Head	Up	DESeq2: Min 5x FC, padj < 0.05	Whole Body	GO:0007602	BP	phototransduction	10	10	8.7e-12
Aedes	Head	Up	DESeq2: Min 5x FC, padj < 0.05	Whole Body	GO:0006813	BP	potassium ion transport	40	15	1.5e-07
Aedes	Head	Up	DESeq2: Min 5x FC, padj < 0.05	Whole Body	GO:0005245	MF	voltage-gated calcium channel activity	6	4	0.00066
Aedes	Head	Up	DESeq2: Min 5x FC, padj < 0.05	Whole Body	GO:0005249	MF	voltage-gated potassium channel activity	19	8	8.1e-05
Aedes	Head	Up	DESeq2: Min 5x FC, padj < 0.05	Whole Body	GO:0005248	MF	voltage-gated sodium channel activity	3	2	0.02013
Aedes	Hindgut	Up	DESeq2: Min 5x FC, padj < 0.05	Whole Gut	GO:0016209	MF	antioxidant activity	33	4	0.02633
Aedes	Hindgut	Up	DESeq2: Min 5x FC, padj < 0.05	Whole Gut	GO:0004198	MF	calcium-dependent cysteine-type endopept...	9	2	0.03675
Aedes	Hindgut	Up	DESeq2: Min 5x FC, padj < 0.05	Whole Gut	GO:0006030	BP	chitin metabolic process	126	15	0.00016
Aedes	Hindgut	Up	DESeq2: Min 5x FC, padj < 0.05	Whole Gut	GO:0004568	MF	chitinase activity	23	3	0.04383
Aedes	Hindgut	Up	DESeq2: Min 5x FC, padj < 0.05	Whole Gut	GO:0006821	BP	chloride transport	12	3	0.01113
Aedes	Hindgut	Up	DESeq2: Min 5x FC, padj < 0.05	Whole Gut	GO:0020037	MF	heme binding	194	14	0.00757
Aedes	Hindgut	Up	DESeq2: Min 5x FC, padj < 0.05	Whole Gut	GO:0006811	BP	ion transport	347	24	0.00711
Aedes	Hindgut	Up	DESeq2: Min 5x FC, padj < 0.05	Whole Gut	GO:0006629	BP	lipid metabolic process	290	19	0.0264
Aedes	Hindgut	Up	DESeq2: Min 5x FC, padj < 0.05	Whole Gut	GO:0008233	MF	peptidase activity	652	58	1.6e-11
Aedes	Hindgut	Up	DESeq2: Min 5x FC, padj < 0.05	Whole Gut	GO:0004601	MF	peroxidase activity	21	3	0.03462
Aedes	Hindgut	Up	DESeq2: Min 5x FC, padj < 0.05	Whole Gut	GO:0004623	MF	phospholipase A2 activity	8	2	0.02924
Aedes	Hindgut	Up	DESeq2: Min 5x FC, padj < 0.05	Whole Gut	GO:0006813	BP	potassium ion transport	40	7	0.001
Aedes	Hindgut	Up	DESeq2: Min 5x FC, padj < 0.05	Whole Gut	GO:0006885	BP	regulation of pH	5	2	0.01518
Aedes	Hindgut	Up	DESeq2: Min 5x FC, padj < 0.05	Whole Gut	GO:0006970	BP	response to osmotic stress	1	1	0.04066
Aedes	Hindgut	Up	DESeq2: Min 5x FC, padj < 0.05	Whole Gut	GO:0007271	BP	synaptic transmission, cholinergic	5	2	0.01518
Aedes	MT	Up	DESeq2: Min 5x FC, padj < 0.05	Whole Body	GO:0015991	BP	ATP hydrolysis coupled proton transport	22	14	5.4e-11
Aedes	MT	Up	DESeq2: Min 5x FC, padj < 0.05	Whole Body	GO:0006030	BP	chitin metabolic process	126	23	0.00011
Aedes	MT	Up	DESeq2: Min 5x FC, padj < 0.05	Whole Body	GO:0006952	BP	defense response	23	7	0.00147
Aedes	MT	Up	DESeq2: Min 5x FC, padj < 0.05	Whole Body	GO:0008083	MF	growth factor activity	13	5	0.00083
Aedes	MT	Up	DESeq2: Min 5x FC, padj < 0.05	Whole Body	GO:0020037	MF	heme binding	194	44	4.3e-14
Aedes	MT	Up	DESeq2: Min 5x FC, padj < 0.05	Whole Body	GO:0006811	BP	ion transport	347	60	2.6e-09
Aedes	MT	Up	DESeq2: Min 5x FC, padj < 0.05	Whole Body	GO:0008233	MF	peptidase activity	652	55	0.01589
Aedes	MT	Up	DESeq2: Min 5x FC, padj < 0.05	Whole Body	GO:0009253	BP	peptidoglycan catabolic process	11	5	0.00093
Aedes	MT	Up	DESeq2: Min 5x FC, padj < 0.05	Whole Body	GO:0061783	MF	peptidoglycan muralytic activity	17	7	4.3e-05
Aedes	MT	Up	DESeq2: Min 5x FC, padj < 0.05	Whole Body	GO:0008272	BP	sulfate transport	10	7	1.8e-06
Aedes	Ovaries	Up	DESeq2: Min 2x FC, padj < 0.05	Whole Body	GO:0007049	BP	cell cycle	119	9	0.00361
Aedes	Ovaries	Up	DESeq2: Min 2x FC, padj < 0.05	Whole Body	GO:0051276	BP	chromosome organization	325	14	0.04213
Aedes	Ovaries	Up	DESeq2: Min 2x FC, padj < 0.05	Whole Body	GO:0006281	BP	DNA repair	122	11	0.0003
Aedes	Ovaries	Up	DESeq2: Min 2x FC, padj < 0.05	Whole Body	GO:0006260	BP	DNA replication	72	14	2.9e-09
Aedes	Ovaries	Up	DESeq2: Min 2x FC, padj < 0.05	Whole Body	GO:0032418	BP	lysosome localization	1	1	0.02595
Aedes	Ovaries	Up	DESeq2: Min 2x FC, padj < 0.05	Whole Body	GO:0000398	BP	mRNA splicing, via spliceosome	50	4	0.03996
Aedes	Ovaries	Up	DESeq2: Min 2x FC, padj < 0.05	Whole Body	GO:0004518	MF	nuclease activity	90	9	0.00167
Aedes	Ovaries	Up	DESeq2: Min 2x FC, padj < 0.05	Whole Body	GO:0006479	BP	protein methylation	24	4	0.0031
Aedes	Post MG	Up	DESeq2, padj < 0.05	Crop, Prov, Ant MG, Hindgut	GO:0015171	MF	amino acid transmembrane transporter act...	12	3	0.01578
Aedes	Post MG	Up	DESeq2, padj < 0.05	Crop, Prov, Ant MG, Hindgut	GO:0006520	BP	cellular amino acid metabolic process	264	27	0.00488
Aedes	Post MG	Up	DESeq2, padj < 0.05	Crop, Prov, Ant MG, Hindgut	GO:0006730	BP	one-carbon metabolic process	10	3	0.01925
Aedes	Post MG	Up	DESeq2, padj < 0.05	Crop, Prov, Ant MG, Hindgut	GO:0008233	MF	peptidase activity	652	66	7.4e-10
Aedes	Post MG	Up	DESeq2, padj < 0.05	Crop, Prov, Ant MG, Hindgut	GO:0022613	BP	ribonucleoprotein complex biogenesis	220	69	1e-30
Aedes	Post MG	Up	DESeq2, padj < 0.05	Crop, Prov, Ant MG, Hindgut	GO:0006614	BP	SRP-dependent cotranslational protein ta...	10	7	2.9e-07
Aedes	Post MG	Up	DESeq2, padj < 0.05	Crop, Prov, Ant MG, Hindgut	GO:0006412	BP	translation	253	78	1e-30
Aedes	Post MG	Up	DESeq2, padj < 0.05	Crop, Prov, Ant MG, Hindgut	GO:0006767	BP	water-soluble vitamin metabolic process	36	6	0.01973
Aedes	Proventriculus	Up	DESeq2: Min 5x FC, padj < 0.05	Whole Gut	GO:0007589	BP	body fluid secretion (diuretic hormone)	1	1	0.03006
Aedes	Proventriculus	Up	DESeq2: Min 5x FC, padj < 0.05	Whole Gut	GO:0006816	BP	calcium ion transport	22	3	0.02705
Aedes	Proventriculus	Up	DESeq2: Min 5x FC, padj < 0.05	Whole Gut	GO:0005975	BP	carbohydrate metabolic process	232	16	0.00157
Aedes	Proventriculus	Up	DESeq2: Min 5x FC, padj < 0.05	Whole Gut	GO:0006030	BP	chitin metabolic process	126	17	1.7e-07
Aedes	Proventriculus	Up	DESeq2: Min 5x FC, padj < 0.05	Whole Gut	GO:0004568	MF	chitinase activity	23	3	0.02159
Aedes	Proventriculus	Up	DESeq2: Min 5x FC, padj < 0.05	Whole Gut	GO:0008613	MF	diuretic hormone activity	1	1	0.0263
Aedes	Proventriculus	Up	DESeq2: Min 5x FC, padj < 0.05	Whole Gut	GO:0020037	MF	heme binding	194	13	0.00182
Aedes	Proventriculus	Up	DESeq2: Min 5x FC, padj < 0.05	Whole Gut	GO:0003796	MF	lysozyme activity	6	2	0.00964
Aedes	Proventriculus	Up	DESeq2: Min 5x FC, padj < 0.05	Whole Gut	GO:0008233	MF	peptidase activity	652	26	0.0217
Aedes	Proventriculus	Up	DESeq2: Min 5x FC, padj < 0.05	Whole Gut	GO:0007602	BP	phototransduction	10	3	0.00275
Aedes	Proventriculus	Up	DESeq2: Min 5x FC, padj < 0.05	Whole Gut	GO:0016055	BP	Wnt signaling pathway	33	9	3.4e-07
Aedes	Thorax	Up	DESeq2: Min 5x FC, padj < 0.05	Whole Body	GO:0006754	BP	ATP biosynthetic process	45	21	4e-18
Aedes	Thorax	Up	DESeq2: Min 5x FC, padj < 0.05	Whole Body	GO:0006816	BP	calcium ion transport	22	5	0.00157
Aedes	Thorax	Up	DESeq2: Min 5x FC, padj < 0.05	Whole Body	GO:0016052	BP	carbohydrate catabolism	30	8	1.8e-05
Aedes	Thorax	Up	DESeq2: Min 5x FC, padj < 0.05	Whole Body	GO:0005975	BP	carbohydrate metabolic process	232	21	0.00042
Aedes	Thorax	Up	DESeq2: Min 5x FC, padj < 0.05	Whole Body	GO:0045333	BP	cellular respiration	83	44	1e-30
Aedes	Thorax	Up	DESeq2: Min 5x FC, padj < 0.05	Whole Body	GO:0020037	MF	heme binding	194	13	0.0494
Aedes	Thorax	Up	DESeq2: Min 5x FC, padj < 0.05	Whole Body	GO:0006811	BP	ion transport	347	56	3.6e-20
Aedes	Thorax	Up	DESeq2: Min 5x FC, padj < 0.05	Whole Body	GO:0006813	BP	potassium ion transport	40	5	0.02166
Aedes	Thorax	Up	DESeq2: Min 5x FC, padj < 0.05	Whole Body	GO:0005044	MF	scavenger receptor activity	10	4	0.00045
Aedes	Thorax	Up	DESeq2: Min 5x FC, padj < 0.05	Whole Body	GO:0006814	BP	sodium ion transport	67	9	0.00139
Aedes	Thorax	Up	DESeq2: Min 5x FC, padj < 0.05	Whole Body	GO:0004784	MF	superoxide dismutase activity	6	2	0.02175
Aedes	Thorax	Up	DESeq2: Min 5x FC, padj < 0.05	Whole Body	GO:0005245	MF	voltage-gated calcium channel activity	6	2	0.02175
Anopheles	Ant MG	Up	DESeq2: Min 5x FC, padj < 0.05	Whole Gut	GO:0015701	BP	bicarbonate transport	3	1	0.0186
Anopheles	Ant MG	Up	DESeq2: Min 5x FC, padj < 0.05	Whole Gut	GO:0007589	BP	body fluid secretion (diuretic hormone)	1	1	0.0062
Anopheles	Ant MG	Up	DESeq2: Min 5x FC, padj < 0.05	Whole Gut	GO:0008613	MF	diuretic hormone activity	1	1	0.00624
Anopheles	Ant MG	Up	DESeq2: Min 5x FC, padj < 0.05	Whole Gut	GO:0020037	MF	heme binding	160	5	0.00308
Anopheles	Ant MG	Up	DESeq2: Min 5x FC, padj < 0.05	Whole Gut	GO:0007041	BP	lysosomal transport	5	1	0.0308
Anopheles	Ant MG	Up	DESeq2: Min 5x FC, padj < 0.05	Whole Gut	GO:0045744	BP	negative regulation of G protein-coupled...	2	1	0.0124
Anopheles	Ant MG	Up	DESeq2: Min 5x FC, padj < 0.05	Whole Gut	GO:0015711	BP	organic anion transport	59	3	0.0057
Anopheles	Ant MG	Up	DESeq2: Min 5x FC, padj < 0.05	Whole Gut	GO:0004623	MF	phospholipase A2 activity	8	1	0.04883
Anopheles	Post MG	Up	DESeq2, padj < 0.05	Prov, Ant MG	GO:0006754	BP	ATP biosynthetic process	49	19	3.3e-11
Anopheles	Post MG	Up	DESeq2, padj < 0.05	Prov, Ant MG	GO:0015991	BP	ATP hydrolysis coupled proton transport	25	14	2.9e-11
Anopheles	Post MG	Up	DESeq2, padj < 0.05	Prov, Ant MG	GO:0045333	BP	cellular respiration	86	23	1.5e-09
Anopheles	Post MG	Up	DESeq2, padj < 0.05	Prov, Ant MG	GO:0032367	BP	intracellular cholesterol transport	14	4	0.00931
Anopheles	Post MG	Up	DESeq2, padj < 0.05	Prov, Ant MG	GO:0006811	BP	ion transport	392	51	3.4e-07
Anopheles	Post MG	Up	DESeq2, padj < 0.05	Prov, Ant MG	GO:0008233	MF	peptidase activity	658	63	4.3e-06
Anopheles	Post MG	Up	DESeq2, padj < 0.05	Prov, Ant MG	GO:0006885	BP	regulation of pH	16	5	0.00235
Anopheles	Post MG	Up	DESeq2, padj < 0.05	Prov, Ant MG	GO:0022613	BP	ribonucleoprotein complex biogenesis	296	83	1e-30
Anopheles	Post MG	Up	DESeq2, padj < 0.05	Prov, Ant MG	GO:0006412	BP	translation	284	82	1e-30
Anopheles	Proventriculus	Up	DESeq2: Min 5x FC, padj < 0.05	Whole Gut	GO:1901606	BP	alpha-amino acid catabolic process	52	6	0.00047
Anopheles	Proventriculus	Up	DESeq2: Min 5x FC, padj < 0.05	Whole Gut	GO:0016160	MF	amylase activity	2	1	0.0355
Anopheles	Proventriculus	Up	DESeq2: Min 5x FC, padj < 0.05	Whole Gut	GO:0007589	BP	body fluid secretion (diuretic hormone)	1	1	0.01943
Anopheles	Proventriculus	Up	DESeq2: Min 5x FC, padj < 0.05	Whole Gut	GO:0005975	BP	carbohydrate metabolic process	252	12	0.00349
Anopheles	Proventriculus	Up	DESeq2: Min 5x FC, padj < 0.05	Whole Gut	GO:0006030	BP	chitin metabolic process	143	13	3.5e-06
Anopheles	Proventriculus	Up	DESeq2: Min 5x FC, padj < 0.05	Whole Gut	GO:0006952	BP	defense response	45	6	0.00021
Anopheles	Proventriculus	Up	DESeq2: Min 5x FC, padj < 0.05	Whole Gut	GO:0008613	MF	diuretic hormone activity	1	1	0.0179
Anopheles	Proventriculus	Up	DESeq2: Min 5x FC, padj < 0.05	Whole Gut	GO:0004364	MF	glutathione transferase activity	28	3	0.0133
Anopheles	Proventriculus	Up	DESeq2: Min 5x FC, padj < 0.05	Whole Gut	GO:0005319	MF	lipid transporter activity	33	3	0.0207
Anopheles	Proventriculus	Up	DESeq2: Min 5x FC, padj < 0.05	Whole Gut	GO:0003796	MF	lysozyme activity	9	4	1.2e-05
Anopheles	Proventriculus	Up	DESeq2: Min 5x FC, padj < 0.05	Whole Gut	GO:0045744	BP	negative regulation of G protein-coupled...	2	1	0.03849
Anopheles	Proventriculus	Up	DESeq2: Min 5x FC, padj < 0.05	Whole Gut	GO:0008233	MF	peptidase activity	658	21	0.0066
Anopheles	Proventriculus	Up	DESeq2: Min 5x FC, padj < 0.05	Whole Gut	GO:0061783	MF	peptidoglycan muralytic activity	18	5	1.2e-05
Anopheles	Proventriculus	Up	DESeq2: Min 5x FC, padj < 0.05	Whole Gut	GO:0007366	BP	periodic partitioning by pair rule gene	1	1	0.01943
Anopheles	Proventriculus	Up	DESeq2: Min 5x FC, padj < 0.05	Whole Gut	GO:0007602	BP	phototransduction	12	2	0.02177
Anopheles	Proventriculus	Up	DESeq2: Min 5x FC, padj < 0.05	Whole Gut	GO:0042364	BP	water-soluble vitamin biosynthetic proce...	14	2	0.02927
Anopheles	Proventriculus	Up	DESeq2: Min 5x FC, padj < 0.05	Whole Gut	GO:0016055	BP	Wnt signaling pathway	38	3	0.0369
