# Supplementary material for: A transcriptomic atlas of Aedes aegypti reveals detailed functional organization of major body parts and gut regional specializations in sugar-fed and blood-fed adult females
Source: eLife. 2022 Apr 26;11:e76132. doi: 10.7554/eLife.76132 (PMC9113746; doi:10.7554/eLife.76132)
Supplement: Supplementary file 3. [file elife-76132-supp3.xlsx]

## Sheet: Aedes
Gene Symbol	Gene ID
16S	AAEL018689
AeCs	AAEL005618
AeGfat-1	AAEL009510
Aper50	AAEL002467
ATP6	AAEL018668
cad	AAEL014557
CECD	AAEL029046
CECN	AAEL029047
CHYMO	AAEL003060
COX1	AAEL018662
COX2	AAEL018664
COX3	AAEL018669
DEFA	AAEL003841
DEFC	AAEL003832
DEFD	AAEL003857
DUOX	AAEL007563
EcR	AAEL019431
ET	AAEL007818
ftz-f1	AAEL029046
GAM1	AAEL004522
GPROP1	AAEL006498
GPROP2	AAEL006259
GRRP	AAEL017536
Hnf4	AAEL029046
HR3	AAEL009588
JHA15	AAEL001703
loqs2	AAEL013721
LYSC11	AAEL003723
LYSC4	AAEL017132
LYSC7B	AAEL015404
PGRPLB	AAEL010171
PGRPLC	AAEL014640
PGRP-LE	AAEL027982
PGRPS4	AAEL029046
PGRP-SC1	AAEL029046
SPI	AAEL029046
USP	AAEL029046

## Sheet: Anopheles
Gene Symbol	Gene ID
Cad	AGAP009646
CEC1	AGAP000693
CEC2	AGAP000692
CECB	AGAP000694
DEF1	AGAP011294
GAM1	AGAP008645
LYSC7	AGAP007386
PGRPLB	AGAP001212
PGRPLC	AGAP005203
COX1	AGAP028364
RpL10a	AGAP011298
RpL37	AGAP000952
Rps18	AGAP028693
TRYP1	AGAP008296
TRYP4	AGAP008292
Tsetse EP	AGAP009313
