# Supplementary material for: A transcriptomic atlas of Aedes aegypti reveals detailed functional organization of major body parts and gut regional specializations in sugar-fed and blood-fed adult females
Source: eLife. 2022 Apr 26;11:e76132. doi: 10.7554/eLife.76132 (PMC9113746; doi:10.7554/eLife.76132)
Supplement: Supplementary file 4. [file elife-76132-supp4.xlsx]

## Sheet: Criteria
Inclusion criteria:
Genes are expressed >5 TPM in whole gut, under one or more conditions, or in one or more gut regions
Genes are at least 2x enriched in the gut under one or more conditions or in one or more gut regions compared to whole-body

## Sheet: Lipid Digestion
Gene ID	Putative function	TPM
		Whole Body	Whole Gut	Crop	Prov	Ant	Post	Hind	BF 6 hr	BF 24 hr	BF 48 hr	BF ant	BF Post
AAEL006982	Other Lipase	3.54471	10.2754	6.25092	23.0409	46.5716	6.33812	15.8691	4.55182	13.5632	11.0312	52.7716	14.8446
AAEL006980	Other Lipase	1.95963	0.408907	4.13476	1.67489	2.56734	0	0.269081	0.38086	0	0.355585	6.37287	0
AAEL007874	Other Lipase	47.0684	48.4573	107.122	39.9539	41.1416	45.379	91.6193	18.6308	36.8837	89.0288	35.5253	29.3822
AAEL004933	Other Lipase	6.6106	26.4776	0.719465	0.244398	7.73514	33.1185	0.836051	607.081	458.014	10.9765	32.4569	498.176
AAEL012340	Other Lipase	0.252051	1.70364	0.344704	13.5261	9.45344	0.801109	0.35368	13.4518	376.261	2.75663	64.4067	491.155
AAEL007055	Other Lipase	18.2994	108.378	3.50007	6.25846	59.318	99.969	36.8373	118.699	314.609	197.005	97.7338	434.814
AAEL001837	Other Lipase	21.2819	150.801	4.92681	6.25275	11.217	177.735	5.15069	56.9375	15.7243	279.868	10.6579	40.9557
AAEL000558	Other Lipase	26.5299	3.50688	96.1928	17.7829	0.910305	0.885751	16.1345	2.91394	1.46703	4.0191	0.47255	0.222594
AAEL012343	Other Lipase	2.9087	2.89557	0.623636	0.489046	0.467186	0	97.5382	0	0	3.45014	0	0
AAEL023211	Other Lipase	1.44089	1.10153	6.03537	3.54309	1.36074	0.774506	2.75989	0.552599	1.33288	1.86842	3.20062	1.4163
AAEL011528	Other Lipase	0.160726	0.762032	0.733313	17.8208	1.93599	0.0899474	0	0.741732	0.403957	0.619742	3.1961	0
AAEL002909	Other Lipase	0	0.486817	0.0581605	0.122262	0	0	33.9507	0.365839	0.324992	1.30312	0	0
AAEL015180	Other Lipase	0.88876	0.0789159	5.55389	0.709096	0	0	0.631155	0	0.369043	0.258053	0.118137	0.0981425
AAEL022479	Other Lipase	0	0.190888	0.0581605	0	0	0	10.1243	0	0	0.0975321	0	0
AAEL002138	Other Lipase	0.125947	0.241045	0.871051	1.20225	2.75979	0	0.549561	0	0.571021	0.645457	5.16793	0.347045
AAEL025030	Other Lipase	3.73683	0.5891	10.5995	4.55959	0.213655	0	2.22016	0.165946	0.246028	0.428053	0	0
AAEL014739	Phospholipase	2.51456	2.331	4.21568	2.65807	2.91027	1.90221	2.69594	0.712753	1.14204	5.12781	4.07128	0.988517
AAEL003651	Phospholipase	9.84095	4.29595	6.04716	10.1814	10.3289	2.91868	6.38008	5.76844	23.5773	3.33025	14.3267	24.8296
AAEL007060	Phospholipase	0.835029	6.39066	0.272492	0.35461	4.82219	4.77309	2.30957	4.12305	94.625	15.5617	13.8053	156.595
AAEL007063	Phospholipase	0.538724	1.9986	0.148991	0	0.120218	1.4228	6.82968	2.95646	78.3646	8.21105	0.426572	84.5644
AAEL005969	Phospholipase	1.20371	1.44734	1.5263	11.4467	0.970796	0.742182	0.986338	0.8347	0.246028	1.15208	0.252983	0.0981425
AAEL023132	Phospholipase	0.321451	0.310906	0	0	0	0.597747	0.272086	0.129457	12.0704	1.15754	0	7.37744
AAEL019751	Phospholipase	12.1492	23.1683	21.3891	61.4556	56.3056	24.1674	16.685	8.35049	2.20512	47.6328	60.6689	2.7175
AAEL001241	Phospholipase	3.30237	1.69298	3.43927	34.108	28.9417	0.14357	3.50381	3.24329	1.14204	3.26326	12.1577	0.222594
AAEL009876	Phospholipase	5.47637	1.45521	23.0528	6.47876	1.14938	0.94291	14.7978	1.20805	0.123014	1.20221	1.15553	0.347045
AAEL010369	Phospholipase	0.869807	0.67747	32.8334	0.947407	0	0.0735532	3.10511	0.756754	0.649985	0.950262	0	0.124451
AAEL009679	Phospholipase	5.61516	0.980601	7.08412	1.32562	0.280312	0.163501	16.1282	0.661243	0.246028	0.575713	0	0
AAEL027150	Phospholipase	8.86991	1.19249	23.6874	4.28451	1.29234	0.545892	2.63652	0.41735	0.817049	2.14975	1.056	0.357977
AAEL010678	Phospholipase	2.18999	1.21577	0.558944	0.360697	0.667746	1.03639	0.187487	1.36649	11.0954	1.07559	9.93438	4.77285
AAEL005600	Phospholipase	4.04599	2.98219	21.1821	7.55985	4.40509	1.81227	5.89701	1.4015	0.974977	4.08417	7.84407	2.14786
AAEL006381	Sphingomyelin phosphodiesterase	11.0557	100.008	9.51529	258.254	289.551	126.898	8.5225	6701.7	731.488	212.103	591.449	723.499
AAEL009111	Sphingomyelin phosphodiesterase	0	0.0363656	0.0465059	0.476872	0	0	0	7.19436	1.00989	0.0880523	0.387828	0.667781

## Sheet: Lipid Transporters
Gene ID	Putative function	TPM
		Whole Body	Whole Gut	Crop	Prov	Ant	Post	Hind	BF 6 hr	BF 24 hr	BF 48 hr	BF ant	BF Post
AAEL000572	Fatty Acid Transporter	22.3029	4.00913	59.8709	13.2255	2.47871	2.3679	1.10513	8.1251	3.16182	7.88183	2.9097	2.37609
AAEL002913	Fatty Acid Transporter	39.0288	40.501	87.9001	71.135	60.2299	32.888	68.9526	59.8275	30.398	45.5457	67.6084	28.2662
AAEL010047	Fatty Acid Transporter	22.4355	24.1091	62.004	19.6972	20.0946	19.3811	12.1589	117.182	43.036	21.4198	25.6938	43.7208
AAEL029014	Lipid Carrier Protein	17.2063	6.3199	6.98434	26.2229	19.986	5.22235	6.85428	8.97672	20.0539	9.4078	43.8129	13.2546
AAEL006126	Lipid Carrier Protein	0.573424	0.189457	0.440226	0.360573	0.327709	0.474108	0	3.93954	213.532	0.267532	114.589	13.7707
AAEL006138	Lipid Carrier Protein	1.005	0.0363656	0.104774	0	0	0	0	19.3849	367.049	0.0724682	150.869	14.583
AAEL008598	Lipid Carrier Protein	0.189077	0.69845	0.253873	9.00798	0.228107	0.738645	0.177591	0.258914	1.9059	1.0952	0.797692	0.877645
AAEL008789	Lipid Carrier Protein	132.102	100.072	2674.6	421.829	42.0388	11.5973	1392.79	66.2982	94.8661	171.349	69.0024	15.069
AAEL010434	Lipid Carrier Protein	1.52766	0.0439158	0.0465059	0	0	0.0717849	0.363576	11.3438	161.342	0	79.3521	9.06154
AAEL012704	Lipid Carrier Protein	11.06	24.0452	5.49191	8.31206	33.3297	23.8334	6.00024	14.1949	22.7694	31.8666	24.505	31.2217
AAEL025229	Lipid Carrier Protein	3.35899	2.79576	2.55638	0.843407	16.354	2.22745	0.464962	11.1674	0	4.49521	0.37112	8.63151
AAEL009561	Lipid Carrier Protein	14.191	78.8021	18.7519	552.274	525.003	57.4996	15.7458	81.7903	92.0508	142.958	655.349	93.8029
AAEL009566	Lipid Carrier Protein	0.592377	2.43757	0.20726	26.512	42.4291	0.161732	0.997736	2.08421	1.59005	3.85391	33.792	0.482428
AAEL009569	Lipid Carrier Protein	57.835	11.8944	8.99835	15.0223	14.0446	1.84017	258.933	17.9498	10.699	16.023	24.5835	1.70712
AAEL009567	Lipid Carrier Protein	2.46718	1.2724	13.6879	3.12277	2.0803	0.617677	7.05497	0.37335	0.123014	1.42234	2.37565	0.259834
AAEL002163	Phospholipid Transporter	34.9713	39.5906	72.0905	126.451	143.43	29.1098	59.8051	30.6134	24.2015	54.0095	156.348	24.3034
AAEL012549	Phospholipid Transporter	10.7507	94.2326	9.67779	134.649	228.95	99.3752	55.9867	52.6617	56.2876	135.649	311.618	89.2828
AAEL009531	Sterol Transporter	4.27282	38.7862	1.4202	1.20385	2.92472	46.3822	1.6934	105.348	63.3419	15.7047	6.13198	68.9341
AAEL012064	Sterol Transporter	119.206	18.7173	384.631	38.6351	5.96886	1.91598	193.213	49.4559	49.5568	28.5922	5.36889	1.98882
AAEL007591	Sterol Transporter	3.05008	25.4296	1.19943	0.482959	1.58634	37.2227	1.83529	122.472	446.888	51.5961	7.43454	1292.83
AAEL007592	Sterol Transporter	5.24022	41.3331	2.03053	3.98977	16.87	39.8489	1.7828	46.2854	125.652	26.3275	12.9382	274.368
AAEL009556	Sterol Transporter	0.305626	2.04058	0.148991	0.715058	0.280312	3.13092	0.185985	3.5462	63.4708	5.4469	5.33167	57.876
AAEL009760	Sterol Transporter	88.9951	728.727	77.4583	2092.89	2660.64	833.806	40.6737	254.044	255.684	1759.77	5451.47	344.485
AAEL015136	Sterol Transporter	54.2141	279.956	7.55042	121.5	462.017	327.662	22.015	5080.16	3372.24	167.776	335.481	1900.97
AAEL015137	Sterol Transporter	0	0	0	0	0	0	0	0	3.32889	0	0	12.1194
AAEL026174	Sterol Transporter	0.806756	5.22125	0.889471	0.238436	0.327709	10.5259	0.0830965	2.68507	33.1267	2.04143	0.156882	27.2898
AAEL025109	Sterol Transporter	1.81207	7.78728	1.90049	9.37564	64.8568	5.60789	4.54051	131.964	116.256	10.404	65.3546	107.836

## Sheet: AmylasesMaltases & Glucosidases
Gene ID	Putative function	TPM
		Whole Body	Whole Gut	Crop	Prov	Ant	Post	Hind	BF 6 hr	BF 24 hr	BF 48 hr	BF ant	BF Post
AAEL013421	Amylase/Maltase	2.88355	31.9294	14.8119	406.912	592.394	7.12856	4.72954	28.6444	96.2177	64.8297	424.506	74.6926
AAEL008452	Amylase/Maltase	13.1473	9.91948	1.81797	35.5943	45.0251	9.18945	1.07394	6.37965	8.81885	14.6913	49.8487	9.39341
AAEL008502	Amylase/Maltase	21.957	5.15717	43.1483	12.2625	6.16156	0.645042	60.5914	3.54542	1.45466	4.5189	8.04582	0.369541
AAEL000667	Amylase/Maltase	99.3044	738.548	268.467	9355.84	10561.9	4.46201	64.6938	448.953	1285.6	1342.82	18782.6	28.4323
AAEL000642	Amylase/Maltase	12.9371	4.38649	1.26185	1.09402	126.385	0.288908	1.42462	2.827	4.88402	3.02352	67.611	1.13483
AAEL003434	Amylase/Maltase	43.0048	281.157	9.67204	89.729	238.547	320.046	26.8115	522.865	3289.15	447.195	1171.49	2434.36
AAEL000678	Amylase/Maltase	0.412854	2.1494	0.149099	1.8092	44.4253	0.538819	0.0929924	2.01377	22.7345	5.83235	250.744	4.3392
AAEL000651	Amylase/Maltase	5.3245	48.3882	8.87549	139.018	945.003	12.9624	7.17795	50.9215	75.5128	78.895	1571.3	32.562
AAEL000647	Amylase/Maltase	53.7983	449.45	123.019	3181.47	6173.53	149.514	46.8999	393.135	777.681	901.743	8692.05	405.979
AAEL002527	Amylase/Maltase	163.938	128.767	144.134	138.519	99.5112	97.1677	1486.09	103.419	32.5191	129.977	93.5783	29.1734
AAEL017226	Glucosidase	14.8019	91.1777	7.27295	130.082	126.052	82.7781	6.19582	60.978	84.8038	81.2941	150.326	89.3708
AAEL014541	Glucosidase	5.17114	41.4981	3.89925	74.296	103.824	31.9653	12.4292	21.0059	82.2994	64.1433	99.9142	95.1249
AAEL006276	Glucosidase	2.03866	17.9593	0.901234	3.39139	10.5381	21.1065	1.47171	5.25274	8.05498	20.7922	9.35663	13.7581
AAEL005481	Glucosidase	42.304	64.5627	14.4902	91.3434	99.8515	67.3724	236.855	21.4802	24.0087	65.2681	66.2626	23.5677
AAEL021573	Glucosidase	16.6376	13.7454	18.1849	30.1735	34.6993	14.5815	23.6918	16.3334	14.3271	25.4169	30.2544	10.9657
AAEL000223	Glucosidase	20.5004	120.492	4.53812	33.4957	334.394	140.898	6.42682	1010.82	807.382	92.9084	652.234	862.315
AAEL004369	Glucosidase	35.7133	362.204	91.3687	3078.4	3702.22	13.9084	16.2877	222.464	513.001	476.822	6297.16	40.2356
AAEL020371	Glucosidase	20.6953	246.576	93.0127	3954.16	6065.28	14.6049	30.0908	134.367	497.206	679.257	8852.1	188.351
AAEL015020	Glucosidase	0.961055	5.14097	0.17459	0.476747	0.56198	4.71895	0.187487	13.8174	26.4066	18.4933	1.53803	19.758
AAEL026915	Glucosidase	5.26897	48.1048	9.23767	215.711	368.051	35.6374	4.30747	34.8596	27.5927	70.0071	378.196	11.6906

## Sheet: Sugar Transporters
Gene ID	Putative function	TPM
		Whole Body	Whole Gut	Crop	Prov	Ant	Post	Hind	BF 6 hr	BF 24 hr	BF 48 hr	BF ant	BF Post
AAEL005349	Transporter	10.8679	37.4525	2.50531	3.63629	15.199	47.0884	71.6088	14.9823	5.76176	41.9594	11.7778	5.31319
AAEL005353	Transporter	42.1015	78.1543	130.583	104.976	239.341	76.9039	86.4193	33.0128	26.5903	110.477	167.767	18.4921
AAEL002292	Transporter	7.58082	44.2682	2.76168	33.4998	20.5535	46.2472	8.11478	65.8703	20.7936	32.687	17.6702	33.1843
AAEL003899	Transporter	39.7455	219.656	15.3427	68.9516	199.798	246.272	40.3164	30.8404	104.527	196.236	99.6129	170.195
AAEL006482	Transporter	3.80975	8.13423	5.88475	0.727108	2.665	0.145338	223.489	1.99875	3.6281	7.84652	0.588784	0
AAEL011368	Transporter	6.46547	12.7169	3.56842	76.4313	107.959	4.47396	35.2859	25.2412	8.33593	8.9521	105.005	0.9693
AAEL006274	Transporter	19.6916	40.1025	9.97004	279.198	429.405	19.3532	3.37732	42.3883	96.3918	30.5364	523.353	55.5831
AAEL006432	Transporter	1.06813	0.609036	14.1531	0.959456	0.661582	0.377087	0.996234	0.121946	0.246028	0.896754	0.236275	0.64412
AAEL007050	Transporter	9.20052	47.1463	1.6157	0.721145	7.63073	59.7355	1.5716	17.6616	16.4532	72.1954	2.2856	18.8363
AAEL008232	Transporter	17.3416	48.4987	8.27567	14.2826	26.7438	50.3648	29.8588	38.3613	29.6807	43.2219	22.1847	41.8466
AAEL010348	Transporter	12.3447	35.4121	67.0419	72.7516	88.9788	42.3464	17.8489	11.234	15.5223	45.5582	69.1492	19.5356
AAEL010478	Transporter	1.74212	10.1154	3.4241	149.483	163.106	0.310607	0.355183	8.85223	9.51451	12.4429	171.303	1.83601
AAEL010479	Transporter	91.649	603.855	484.906	3909.37	8821.33	166.566	44.4316	456.525	769.754	1134.52	9074.06	81.5935
AAEL010485	Transporter	8.39754	9.40641	5.20144	5.53694	8.48208	7.35105	69.2934	51.1271	56.0981	19.0843	19.0459	58.1839
AAEL010868	Transporter	3.62671	32.7046	2.08379	27.3357	92.5617	41.7916	3.02683	8.32044	15.504	42.7891	29.2584	12.2758
AAEL012042	Transporter	1.90943	1.18428	3.18983	3.24478	5.34294	1.33993	1.35831	3.4582	1.79203	0.74299	3.87836	3.44883
AAEL019597	Transporter	55.0429	64.1626	11.0632	98.9893	147.184	54.2708	23.2333	228.819	168.63	71.2929	221.669	71.2395
AAEL023753	Transporter	5.47315	7.31655	5.39816	10.9217	8.11506	8.59119	1.61511	37.4315	13.5981	9.39495	17.6899	20.0585
AAEL026825	Transporter	52.837	51.7898	267.641	95.8642	26.3207	58.8969	62.6542	9.19914	3.66302	78.393	15.6664	2.68026
AAEL011520	Transporter	26.2175	21.1315	14.3716	1.56443	3.3973	23.3445	3.91324	11.9777	232.923	9.01365	29.0438	192.774
AAEL010650	Transporter	12.6061	12.3395	1.02659	0.843157	0.708979	15.7785	1.5503	212.068	21.2043	9.38463	2.54806	47.6581
AAEL011519	Transporter	5.93928	11.6224	0.272492	0	0.568145	18.6269	0.278977	0.502807	0.571021	1.94521	0	0.803164
AAEL004479	Transporter	1.8936	0.724822	5.4528	3.84429	5.22561	0.179895	1.25542	0.653732	0	0.749094	2.16746	0.803164
AAEL024953	Transporter	25.6622	9.28659	2.75613	1.79106	4.80766	9.93302	4.58106	43.4713	49.7055	5.5782	11.8332	62.1705
AAEL000902	Transporter	142.673	123.352	113.553	41.3914	83.6623	108.342	188.699	623.77	26.3609	160.661	55.6541	15.2043
AAEL004451	Transporter	6.84003	6.39823	5.83904	7.73056	15.1274	4.74423	69.0186	24.2272	9.06487	6.48859	17.8145	7.61155
AAEL003192	Transporter	4.24752	4.07891	4.61084	4.33892	2.51979	3.35642	0.46947	71.8564	15.9279	3.53221	9.23961	11.1637
AAEL002742	Transporter	6.64827	1.64899	1.3346	1.22212	0.514583	0.470571	16.8626	11.1268	6.56968	1.66754	0.252983	0.541533

## Sheet: Peptidases
Gene ID	Putative function	TPM
		Whole Body	Whole Gut	Crop	Prov	Ant	Post	Hind	BF 6 hr	BF 24 hr	BF 48 hr	BF ant	BF Post
AAEL015247	Aminopeptidase	21.9223	171.755	3.50055	8.80334	54.4249	195.904	15.3696	1180.84	140.106	198.15	54.9439	181.942
AAEL026928	Aminopeptidase	4.61581	7.39269	13.311	20.5287	10.8729	0.488734	206.57	3.69565	1.58091	7.19093	15.91	0.368909
AAEL012783	Aminopeptidase	81.1197	615.328	37.7858	385.508	713.058	774	84.813	3410.85	717.998	464.482	460.529	423.838
AAEL025617	Aminopeptidase	15.1402	81.3449	3.47072	1.93742	5.62941	112.239	6.34611	34.8938	542.655	107.38	17.2628	472.429
AAEL005821	Aminopeptidase	27.9561	255.263	11.1092	14.1456	81.9466	300.644	17.5586	907.48	235.956	345.671	59.6582	217.171
AAEL012099	Aminopeptidase	16.9649	65.3505	51.9152	366.25	465.799	36.7058	118.269	27.3059	22.8849	78.1178	336.619	15.4406
AAEL005808	Aminopeptidase	8.98277	80.0187	5.42296	36.5005	223.255	75.7052	5.59916	64.4593	213.885	149.293	238.723	238.107
AAEL019828	Aminopeptidase	18.0581	174.15	7.13703	2.43802	15.6304	211.228	12.7526	61.531	243.928	208.357	32.7421	332.34
AAEL007892	Aminopeptidase	14.4412	63.6455	4.75233	16.5326	12.6812	65.032	9.89854	207.224	201.592	40.7774	19.5975	159.994
AAEL009764	Aminopeptidase	26.3453	37.6908	23.0292	24.3972	52.4472	38.1758	41.9868	367.282	126.122	87.1333	88.7701	148.316
AAEL020609	Aminopeptidase	10.9542	63.9384	2.34498	1.68694	8.91054	78.2267	4.51829	18.538	115.378	65.5015	16.3736	135.546
AAEL008163	Aminopeptidase	2.27183	13.5519	0.363322	0	3.17613	19.2172	1.8872	20.4057	17.2595	14.9528	3.68417	21.4883
AAEL012778	Aminopeptidase	66.4405	492.761	25.0651	8.47643	46.4876	578.362	79.5685	284.834	446.058	608.268	42.0767	586.292
AAEL003194	Aminopeptidase	5.62112	3.39519	40.4495	14.2112	5.7271	1.82245	11.8592	1.89182	1.79203	8.35989	4.66125	0.270766
AAEL017244	Aminopeptidase	12.6855	44.6192	25.0216	8.39792	6.40446	49.2601	45.9765	23.3845	51.1742	65.6898	11.0469	47.373
AAEL019536	Aminopeptidase	102.361	365.689	30.8936	21.2431	28.5964	482.187	45.438	456.083	165.448	296.573	18.3919	249.311
AAEL018249	Aminopeptidase	16.8703	18.9499	0.873142	2.29178	4.23883	21.7574	3.38409	62.9732	45.9045	21.2289	5.29626	63.3302
AAEL002978	Aminopeptidase	125.905	36.5794	28.4399	37.4755	51.32	33.9728	35.8196	169.65	207.289	64.7637	80.7253	309.607
AAEL012103	Aminopeptidase	4.55346	0.471104	10.1988	4.79157	0.787964	0.41518	2.76521	0.424861	0	1.33767	0.393157	0
AAEL011662	Carboxypeptidase	0.0630517	0.466834	0	0.238436	1.6632	0.740413	0	3.03949	37.9575	1.44403	1.45521	20.8611
AAEL012664	Carboxypeptidase	0.0535752	1.28612	0	0	0	1.19989	0.260688	2.62457	3.55828	1.78949	0.134845	5.53288
AAEL010782	Carboxypeptidase	250.886	1629.05	57.8844	112.161	783.043	2109.52	70.042	4079.28	15758.7	1280.97	2584.39	13149.3
AAEL006563	Carboxypeptidase	4.36782	0.036209	0	0	0	0	0	4.71924	231.422	0.450393	146.957	14.722
AAEL007926	Carboxypeptidase	40.1026	315.774	17.1091	103.629	116.198	363.033	14.3254	822.498	1367.31	347.943	170.446	1510.69
AAEL001839	Carboxypeptidase	1.33882	8.20522	0.149099	0.244398	19.0458	7.07982	0.448175	43.8554	15.1334	7.2113	13.0984	23.0776
AAEL012351	Carboxypeptidase	4.53388	25.2535	0.84973	0.36641	1.47016	26.9057	3.57396	137.113	62.3062	11.9931	0	40.4123
AAEL008609	Carboxypeptidase	13.9495	93.2211	6.08674	49.3431	77.3569	105.362	3.64959	57.0269	230.946	240.497	256.315	308.017
AAEL001840	Carboxypeptidase	9.46683	43.4352	2.24018	14.2034	49.2911	48.3578	1.721	18.4064	161.497	42.4444	32.1362	133.511
AAEL010776	Carboxypeptidase	148.543	805.01	30.733	15.2707	138.154	1056.67	24.9747	2407.2	911.48	537.388	50.7844	605.659
AAEL003424	Carboxypeptidase	13.3345	92.8633	3.58599	4.34501	49.8612	116.12	1.95797	25.166	58.033	77.8538	36.5961	53.7634
AAEL008599	Carboxypeptidase	15.0262	115.537	4.43581	3.2936	71.5353	127.187	3.42518	90.3301	21.6273	51.5682	43.6336	24.6243
AAEL008600	Carboxypeptidase	13.8864	107.718	2.54284	3.36145	29.7405	113.914	2.21357	116.015	27.6867	98.8578	26.462	33.0348
AAEL001863	Carboxypeptidase	2720.9	13520.7	684.003	262.862	6485.8	19116.6	788.257	5171.8	14187.7	9550.27	3788.79	15043.9
AAEL001844	Carboxypeptidase	12.8178	20.2298	4.10281	25.392	53.5022	19.6931	24.0064	9.811	31.7461	30.5019	36.3194	41.1555
AAEL003781	Carboxypeptidase	7.14408	4.50998	9.42879	10.2544	13.4197	3.60326	6.05543	8.17596	18.3758	7.59534	17.4506	8.28788
AAEL017499	Carboxypeptidase	55.632	23.3856	127.721	61.8389	33.1463	16.3977	92.4419	13.6369	16.6112	32.7524	42.261	14.2141
AAEL007316	Cysteine peptidase	10.209	7.67929	153.564	25.9976	1.97935	0.55875	100.846	2.60848	3.6281	9.2864	1.36977	0.259834
AAEL003476	Cysteine peptidase	8.0857	1.48084	41.829	4.65142	0.757141	0.0717849	2.35216	1.85427	0.526971	2.07663	0.470647	0.519669
AAEL003952	Cysteine peptidase	27.2879	7.0129	137.528	28.3511	8.51426	1.97046	88.2897	4.40734	4.11102	10.3329	8.32267	1.19838
AAEL009642	Cysteine peptidase	11.9862	2.49268	7.22714	4.16018	5.26785	1.99699	3.62354	7.75809	43.5203	4.3534	33.3943	7.35876
AAEL005472	Cysteine peptidase	21.0623	16.0386	19.1027	35.7454	51.4311	12.37	28.6642	30.0655	26.8621	22.244	76.3948	18.8679
AAEL006337	Cysteine peptidase	35.5135	37.562	16.5743	32.3282	42.3549	37.2789	29.0584	78.2728	25.4907	62.4788	49.8387	13.7587
AAEL021728	Dipeptidase	15.6014	33.7243	5.53078	13.0164	31.2635	32.0441	8.44271	210.093	227.882	40.8241	60.2622	131.084
AAEL000842	Dipeptidase	1.24138	7.25099	0.447081	0.482834	0.514583	8.73787	0.614368	1.23809	4.71696	5.48949	0.426572	7.63222
AAEL001588	Dipeptidase	90.3036	49.3889	19.2617	37.3955	60.5791	58.3815	34.9249	535.405	152.278	86.3624	71.1755	146.636
AAEL008893	Dipeptidase	31.0496	24.0366	25.132	41.9676	42.8072	21.3334	18.1863	50.3009	57.0972	27.5625	63.0934	46.9256
AAEL012873	Dipeptidyl peptidase	0.24273	1.13131	0.0908306	0.122262	0.560623	0	28.0922	0.453839	0.201978	0.336625	0.156882	0
AAEL027166	Dipeptidyl peptidase	3.77241	44.7014	4.89223	2.13137	2.70231	66.0613	8.05746	397.418	21.3781	6.65057	0.41857	29.1839
AAEL023559	Dipeptidyl peptidase	23.9007	201.869	16.4403	5.2565	8.70063	282.374	31.569	2494.87	118.402	30.7727	1.2543	191.099
AAEL017460	Dipeptidyl peptidase	10.2972	11.9792	7.73427	17.7411	6.04378	0.766552	457.717	16.4099	21.9416	21.7049	1.5821	0.497804
AAEL015110	Dipeptidyl peptidase	46.9729	265.27	8.54383	4.63798	73.5058	390.018	14.9052	1102.92	212.285	223.052	44.6471	188.626
AAEL002870	Dipeptidyl peptidase	33.6391	47.1367	37.3533	114.457	173.816	41.6838	48.8186	55.7175	63.8248	96.7574	194.467	75.0639
AAEL026826	Other peptidase	0.4033	1.66621	0.961048	6.23436	0.394365	0	45.4642	0.632264	0.448007	2.06507	0	0
AAEL020441	Other peptidase	5.90529	22.0493	5.00832	1.93134	7.24522	20.8404	9.96332	70.0768	335.456	10.1588	24.0707	191.412
AAEL014516	Other peptidase	3229.42	20498	1132.63	379.34	2440.63	25385.3	926.111	3837.94	370.869	8147.42	131.181	1397.31
AAEL000271	Other peptidase	48.4455	106.627	16.8399	136.463	142.658	113.483	14.0749	108.051	306.155	125.463	321.204	370.987
AAEL011557	Other peptidase	1.25423	0.887925	1.32272	0.959332	0.0934372	0.233517	8.13374	0.609732	0.369043	1.48468	0	0
AAEL009895	Other peptidase	27.2467	30.8813	78.2522	113.979	56.9958	20.647	131.852	13.5346	12.8858	29.9585	46.5035	5.41518
AAEL014515	Other peptidase	1.92203	5.69554	2.65638	3.1409	1.53142	4.91972	1.65411	0.495296	0.940063	2.86365	0.679555	0.916683
AAEL010938	Other peptidase	6.74737	1.7473	2.98845	2.62813	9.96105	1.73604	4.21744	2.5756	14.8358	2.24118	13.4237	18.0609
AAEL010788	Other peptidase	4.26074	4.51865	3.42031	3.98067	4.63482	5.70287	7.87162	6.78851	1.27727	11.1403	5.46546	2.78649
AAEL006378	Serine endopeptidase, no CLIP	0	0.112455	0.0908306	0.116174	0.120218	0	0	0.41735	7.01018	0.522209	13.984	12.0507
AAEL011889	Serine endopeptidase, no CLIP	0	0	0	0.116174	0.114053	0	0	4.14618	1.96823	0	3.80692	6.15513
AAEL013284	Serine endopeptidase, no CLIP	2.47048	31.1391	0.928793	0.122137	0.582596	20.9573	0.929043	6877.1	82740.7	37.7705	892.243	62977.3
AAEL010202	Serine endopeptidase, no CLIP	1.05865	6.64411	0.104774	0	0.755019	11.2581	0.365079	4034.74	31006.8	68.0086	202.417	17109.3
AAEL024934	Serine endopeptidase, no CLIP	1.08685	8.66201	0.402865	1.33195	4.06369	13.8849	0.848951	23.6824	10925.8	5.11105	21.5479	5699.49
AAEL013712	Serine endopeptidase, no CLIP	18.8615	107.838	1.80051	0.482834	4.00253	173.667	5.2651	14942.4	48748.7	88.6213	222.594	29594.4
AAEL002360	Serine endopeptidase, no CLIP	3.2267	11.6901	0.700631	0.122137	2.7172	17.2525	2.73252	9.55718	7064.16	34.0456	80.8258	7417.31
AAEL011929	Serine endopeptidase, no CLIP	0.626999	19.1398	0.326086	1.66855	6.35978	23.6517	5.99906	15.4786	1036.2	54.6008	78.7851	1211.42
AAEL001674	Serine endopeptidase, no CLIP	0.63632	12.7518	0.148991	1.32015	0.655417	12.7481	0.751452	804.07	573.82	7.83574	53.4703	822.352
AAEL007432	Serine endopeptidase, no CLIP	34.3473	391.404	7.09687	29.7124	705.698	435.569	21.3575	38065.6	1798.61	103.418	7733.99	1457.17
AAEL008782	Serine endopeptidase, no CLIP	1.68596	11.3098	1.33209	35.1448	116.788	4.45805	0.467967	6.95999	973.976	29.0294	481.161	1312.16
AAEL002347	Serine endopeptidase, no CLIP	13.9217	85.6306	4.01913	1.70483	4.68387	107.688	10.985	28.8038	8861.88	61.6663	44.752	10491.4
AAEL006903	Serine endopeptidase, no CLIP	0.296227	2.48642	0.0908306	0.232349	1.71753	1.67314	0.0830965	21.4387	217.647	2.67468	8.29259	139.779
AAEL008767	Serine endopeptidase, no CLIP	0.179601	3.74305	1.42292	23.395	58.8825	0.364229	0	2.99685	93.6186	5.1604	110.086	101.235
AAEL013715	Serine endopeptidase, no CLIP	44.6165	238.565	2.9886	4.50041	268.701	351.483	12.246	26816.5	1063.68	84.9355	175.808	1675.07
AAEL010196	Serine endopeptidase, no CLIP	123.766	547.559	7.01606	3.99015	10.7938	707.871	32.2057	26235.6	72318.2	142.462	457.748	43542.7
AAEL007601	Serine endopeptidase, no CLIP	17.9915	102.234	2.69652	1.09948	21.0982	162.859	5.30715	7402.11	141.828	17.7014	6.27191	227.557
AAEL023729	Serine endopeptidase, no CLIP	139.169	737.505	13.4304	8.38354	347.581	1089.19	31.9802	34354.5	1398.25	265.346	125.683	2023.98
AAEL011553	Serine endopeptidase, no CLIP	0.645952	3.68382	3.11642	152.313	3.41656	0	0.566969	7.28088	6.5439	7.94275	7.09083	0
AAEL019920	Serine endopeptidase, no CLIP	0.980008	14.2895	5.92344	216.42	123.422	1.21542	2.36806	15.7359	23.8931	18.4782	221.37	11.764
AAEL006365	Serine endopeptidase, no CLIP	0.0630517	0.814599	0.0465059	1.29593	12.0711	0.163501	0.0830965	0.388371	0.772999	1.20221	4.20541	0.606879
AAEL001690	Serine endopeptidase, no CLIP	63.3161	672.386	13.204	10.4091	27.8473	690.871	19.6251	11232.8	5469.88	166.436	569.306	8350.21
AAEL001693	Serine endopeptidase, no CLIP	30.6949	139.127	3.28552	1.20398	6.85277	169.193	27.6668	3518.64	4042.41	95.6446	91.0327	5272.28
AAEL009680	Serine endopeptidase, no CLIP	105.7	647.836	307.368	11637.4	6610.94	36.2092	44.3374	813.774	1374.11	872.225	15154	296.553
AAEL012852	Serine endopeptidase, no CLIP	1.90951	0.247264	0.174698	0.122137	0.0934372	0.145338	0.0944949	0.129457	264.481	0.443637	0.954575	80.2765
AAEL006902	Serine endopeptidase, no CLIP	22.773	205.106	8.13876	3.39214	10.1459	238.44	9.04117	82.373	2724.42	298.078	34.0939	3135.51
AAEL005594	Serine endopeptidase, no CLIP	0.126025	0.588273	0.137336	6.73558	14.6536	0	0.0929924	0.129457	0.817049	0.758574	9.9241	0.0981425
AAEL006384	Serine endopeptidase, no CLIP	0.233176	0.814238	0	0	0.508418	0.0735532	0	1.02708	23.638	1.79624	12.4034	21.5105
AAEL009682	Serine endopeptidase, no CLIP	0.10715	0.847861	0.104666	7.68745	1.27172	0.630535	0	0	0	0.437533	0.291727	0
AAEL008769	Serine endopeptidase, no CLIP	50.2516	268.523	5.83321	3.41624	23.0502	400.401	13.2358	3155	1772.56	306.317	84.339	2468.22
AAEL009244	Serine endopeptidase, no CLIP	227.062	1465.97	216.883	6312.84	12707.1	812.846	95.4414	1200.34	714.711	1910.2	13177.5	389.26
AAEL024784	Serine endopeptidase, no CLIP	4.433	10.4197	151.276	250.338	2.2926	0.308839	93.4843	6.84851	8.13395	15.1322	0.64614	0
AAEL013283	Serine endopeptidase, no CLIP	0.359201	1.69015	0.533454	19.7202	6.87704	0.544124	0.0830965	1.03459	2.48606	0.613637	3.82553	0.851337
AAEL009843	Serine endopeptidase, no CLIP	19.2347	148.896	5.28153	78.7796	130.638	161.179	7.83523	1037.39	415.98	317.241	147.499	403.101
AAEL015109	Serine endopeptidase, no CLIP	0.368444	0.615064	6.28338	19.4961	0	0	1.07244	0.409839	0.123014	0.510001	0	0
AAEL008097	Serine endopeptidase, no CLIP	25.5331	137.969	17.7872	463.829	692.139	110.877	27.6065	208.713	208.135	211.298	1075.2	174.937
AAEL006382	Serine endopeptidase, no CLIP	0.179679	6.77866	0.0908306	0.122262	1.30948	5.86842	0.28048	4.96556	3.6281	5.27689	0.528002	3.14731
AAEL022646	Serine endopeptidase, no CLIP	42.8653	300.757	14.2979	6.0681	214.124	384.214	13.5328	21.1443	1200.82	1355.88	272.005	1383.36
AAEL014938	Serine endopeptidase, no CLIP	0.81631	1.2653	0.207368	5.42064	7.48317	1.0373	0.283485	2.35317	5.9471	1.80572	21.8869	4.43555
AAEL027429	Serine endopeptidase, no CLIP	0.466274	2.04365	0.116429	0.843157	2.14484	3.16596	0	8.84365	12.1569	5.05274	3.00995	10.564
AAEL004979	Serine endopeptidase, no CLIP	3.00927	2.31904	68.4488	8.89814	0.928798	0.959305	0.833046	0.7907	1.6341	3.30728	0.764277	0.320736
AAEL026347	Serine endopeptidase, no CLIP	3.23877	4.33262	3.54269	70.7324	30.8198	0.94291	23.2586	5.00566	6.50898	6.32196	42.2141	1.90989
AAEL014595	Serine endopeptidase, no CLIP	0.979774	1.46779	21.0907	2.62813	3.37669	0.985443	2.50156	0.676264	1.6341	1.87001	1.60414	0.222594
AAEL014567	Serine endopeptidase, no CLIP	0.582901	0.787126	0.516676	3.47763	0.300928	0.823711	11.9177	1.20054	1.59005	1.40675	1.55059	0.270766
AAEL006425	Serine endopeptidase, no CLIP	407.8	3483.3	149.236	247.117	2142.45	3905.78	341.534	839.783	3648.68	6358.31	1545.8	7835.22
AAEL008080	Serine endopeptidase, no CLIP	13.9964	99.4373	10.017	238.371	231.978	93.461	15.5009	60.3472	106.311	131.486	241.353	152.228
AAEL009554	Serine endopeptidase, no CLIP	0.305548	0.0802814	5.11108	0.116174	0	0	0.426881	0	0.246028	0.185584	0	0
AAEL011882	Serine endopeptidase, no CLIP	1.15037	0.849349	0.647485	4.05825	7.42669	0.601283	0.343784	0.251403	1.74798	1.06403	18.9575	0.595947
AAEL006376	Serine endopeptidase, no CLIP	0.844272	13.7437	0.207152	0.366535	0.474707	11.8121	0.830041	6.16432	7.74826	8.1643	0	7.56988
AAEL013628	Serine endopeptidase, no CLIP	178.453	1697.85	63.7953	28.2436	123.593	2080.65	109.948	668.691	877.154	2828.8	31.4784	1383.16
AAEL009853	Serine endopeptidase, no CLIP	1.08692	3.58918	0.297982	3.2208	2.91643	3.64006	1.55331	16.7891	2.4071	3.86066	4.45911	5.06728
AAEL008079	Serine endopeptidase, no CLIP	110.423	659.348	73.0152	1107.47	1089.73	677.12	48.6385	350.175	720.052	867.121	1691.08	973.176
AAEL013623	Serine endopeptidase, no CLIP	241.744	2298.09	84.8119	33.3964	127.668	3018.07	157.76	1687.02	1376.92	3606.25	23.0754	1220.26
AAEL013703	Serine endopeptidase, no CLIP	389.46	3097.05	239.122	381.497	1623.31	3831.28	117.035	1635.42	186.979	5775.11	105.081	482.888
AAEL008784	Serine endopeptidase, no CLIP	64.74	450.238	24.8937	9.27609	86.1969	534.945	14.7699	156.417	152.111	564.526	47.9489	267.73
AAEL005604	Serine endopeptidase, no CLIP	2.47039	3.63081	1.46509	0.476747	0.0934372	1.88228	21.1079	1.54491	1.09799	5.91157	0.134845	0.320736
AAEL003060	Serine endopeptidase, no CLIP	15748.1	112088	4067.86	1719.6	12927.7	129474	4413.51	62185.4	71027.6	77273	7064.82	90096.7
AAEL008404	Serine endopeptidase, no CLIP	0.633699	0.46117	5.09837	0	0.0934372	0.253448	1.11052	0.546807	0.526971	0.46963	0.426572	0
AAEL027984	Serine endopeptidase, no CLIP	2.16468	0.548107	0.986754	13.7139	0.935729	0.400554	0.283485	1.5814	7.66786	2.67065	16.9025	11.0251
AAEL007818	Serine endopeptidase, no CLIP	24779	168584	6142.29	2731.46	54583.3	185098	7259.06	27443.7	3087.84	77764.4	5893.95	10232
AAEL001703	Serine endopeptidase, no CLIP	9079.96	57694.5	1605.55	886.618	12464.1	61097.9	1895.97	21732.7	4990.25	36988.1	5660.06	9588.82
AAEL008378	Serine endopeptidase, no CLIP	2.89585	4.08333	16.8629	10.5024	11.781	3.54115	10.684	0.663251	1.97048	6.62624	4.67511	2.17772
AAEL006253	Serine endopeptidase, no CLIP	2.76333	0.207932	15.0829	1.43024	0	0	0.0944949	0.453839	0.324992	0.283117	0.156882	0
AAEL001233	Serine endopeptidase, no CLIP	4.18353	1.26749	6.17294	4.45522	0.0934372	0.0717849	21.218	0.539296	0.526971	0.73351	0.291727	0
AAEL022822	Serine endopeptidase, no CLIP	2.04829	0.833571	3.16435	0.953494	1.18445	0.398786	10.2618	1.89827	0.369043	1.09182	3.47455	0.357977
AAEL011349	Serine endopeptidase, no CLIP	4.8211	1.35844	23.5779	3.25099	1.31912	0	14.3307	1.91329	1.51108	1.2652	1.74694	0.720398
AAEL006434	Serine endopeptidase, no CLIP	20.9435	3.19689	102.062	5.54253	0.587404	0.0735532	14.2969	2.69902	3.69793	3.56533	0.26969	0.0981425
AAEL007969	Serine endopeptidase, no CLIP	10.8953	5.89132	17.3352	8.94472	1.02917	2.33733	51.7734	12.7246	12.6323	7.9652	0.786314	1.10468
AAEL018346	Serine endopeptidase, no CLIP	1.63544	0.195642	5.40149	1.1918	0	0	2.64253	0.41735	0.123014	0.16052	0	0
AAEL013281	Serine endopeptidase, no CLIP	2.03913	1.53371	5.65607	2.17511	1.04285	0.895496	2.02428	0.84221	0.930927	0.883898	2.0607	0.222594
AAEL006136	Serine endopeptidase, no CLIP	35.2444	2.996	72.1851	21.1694	0.493967	0.253448	48.6128	4.75815	2.28408	6.10456	0.44861	0.49336
AAEL002590	Serine endopeptidase, no CLIP	6.85906	0.93692	26.7804	4.22287	0.40053	0.179895	9.37984	1.12259	0.694035	1.05117	0.156882	0

## Sheet: Amino Acid Transporters
Gene ID	Putative function	TPM
		Whole Body	Whole Gut	Crop	Prov	Ant	Post	Hind	BF 6 hr	BF 24 hr	BF 48 hr	BF ant	BF Post
AAEL002527	Amino acid transporter	163.938	128.767	144.134	138.519	99.5112	97.1677	1486.09	103.419	32.5191	129.977	93.5783	29.1734
AAEL003970	Amino acid transporter	122.658	544.482	11.4538	10.7125	77.1187	590.994	12.8157	340.751	189.132	364.203	15.9228	183.97
AAEL013109	Amino acid transporter	4.92817	28.1455	5.93854	175.979	331.199	8.7565	12.7591	17.007	48.7387	46.7119	373.736	36.2288
AAEL002525	Amino acid transporter	29.1671	9.11337	22.0099	5.73339	3.74908	3.04141	235.308	3.19686	2.93407	8.40327	2.38703	0.633188
AAEL007197	Amino acid transporter	43.5606	21.884	19.0117	169.737	120.49	13.1139	92.5758	8.11452	4.35705	64.2257	88.5572	2.64951
AAEL003387	Amino acid transporter	9.70836	5.58919	22.9355	7.06025	3.0532	0.467035	118.127	1.64687	3.24992	4.28391	0.882415	0.124451
AAEL012131	Amino acid transporter	22.1738	99.1634	6.66233	18.7495	30.8649	110.162	5.93363	352.654	30.27	118.058	17.7655	35.4352
AAEL024520	Amino acid transporter	29.836	52.0476	8.80994	7.62035	10.9903	70.0016	5.52716	1.96332	2.36305	58.2607	0.941294	4.16598
AAEL013111	Amino acid transporter	27.8028	10.7738	40.3015	16.2691	50.9191	4.23604	32.6339	2.96397	36.2993	21.9162	91.1091	37.7941
AAEL019627	Amino acid transporter	18.4612	2.72741	48.566	14.4843	3.93115	1.23005	11.3087	0.409839	0.526971	3.74819	2.75815	0
AAEL007191	Amino acid transporter	11.3677	32.3067	7.15961	4.70496	5.10519	40.4542	5.23975	194.429	106.266	16.1586	23.9766	156.083
AAEL009479	Amino acid transporter	1.84018	0.711006	0.195497	0	0	1.6253	2.07919	49.6261	0.649985	0.468701	0.118137	0.615164
AAEL000714	Amino acid transporter	12.5633	1.61318	39.1582	7.80425	0.655417	0.179895	7.61805	2.63356	1.29997	2.82234	1.13349	0.248902
AAEL008406	Amino acid transporter	18.466	33.027	4.63871	25.5881	27.8463	35.4372	30.5697	92.7656	15.6802	21.3425	26.16	22.2789
AAEL003524	Amino acid transporter	17.4396	17.0621	8.79619	10.9285	10.1522	14.149	8.64009	66.9031	42.8308	11.6158	16.8196	30.4226
AAEL003956	Amino acid transporter	5.04119	8.35487	16.2523	14.9599	16.5029	7.55485	12.826	4.98312	2.16107	6.75002	9.69125	1.35359
AAEL006113	Cystine transporter	20.5724	27.5529	12.4395	62.6994	59.0788	19.2521	43.7977	138.126	17.1306	18.2771	51.5845	15.7918
