# Supplementary material for: A transcriptomic atlas of Aedes aegypti reveals detailed functional organization of major body parts and gut regional specializations in sugar-fed and blood-fed adult females
Source: eLife. 2022 Apr 26;11:e76132. doi: 10.7554/eLife.76132 (PMC9113746; doi:10.7554/eLife.76132)
Supplement: Supplementary file 5. [file elife-76132-supp5.xlsx]

## Sheet: Anopheles Midgut
Gene ID	SubClass	Superfamily	Family	Subfamily	Confidence	VB Symbol	Dmel Ortholog	Aedes Ortholog		Relative Expression			Max TPM		TPM
										Prov	Ant	Post			Prov	Ant	Post
AGAP000098	Autophagy	AutoPha	APHAG	Aphag_other	high	APG1	Aduk	-		58.4071	83.9657	100	1.91688		1.1196	1.60952	1.91688
AGAP008637	Autophagy	AutoPha	APHAG	Aphag_other	high	APG7A	Uba2	APG7A		40.1343	76.9619	100	24.2568		9.73527	18.6685	24.2568
AGAP005102	Autophagy	AutoPha	APHAG	Aphag_other	high	APG7B	Uba3	APG7B		40.4577	77.0329	100	24.864		10.0594	19.1535	24.864
AGAP007873	Autophagy	AutoPha	APHAG	Aphag_other	high	TOR	Tor	-		75.9552	100	71.5101	15.0529		11.4334	15.0529	10.7643
AGAP012793	Autophagy	AutoPha	APHAG	Atg	high	null	Atg6	APG6		0	0	0	0.0702266		0	0.0702266	0
AGAP012847	Autophagy	AutoPha	APHAG	Atg	high	null	Atg12	APG12		100	98.8029	18.8239	1.03508		1.03508	1.02269	0.194843
AGAP012246	Autophagy	AutoPha	APHAG	Atg	high	null	Atg14	-		39.4103	100	56.428	1.12915		0.445002	1.12915	0.637158
AGAP010303	Autophagy	AutoPha	APHAG	Atg	high	null	Atg7	-		50.9156	83.4295	100	18.9775		9.66249	15.8328	18.9775
AGAP029513	Autophagy	AutoPha	APHAG	Atg	high	null	Atg1	-		55.3479	82.3013	100	16.9733		9.39437	13.9693	16.9733
AGAP005715	Autophagy	AutoPha	APHAG	Atg	high	null	Atg13	-		48.9035	74.8136	100	3.56192		1.7419	2.6648	3.56192
AGAP008873	Autophagy	AutoPha	APHAG	Atg	high	null	Atg17	-		79.9917	73.9094	100	34.4816		27.5824	25.4851	34.4816
AGAP000933	Autophagy	AutoPha	APHAG	Atg	high	null	Atg10	-		80.9757	100	76.394	8.99066		7.28026	8.99066	6.86833
AGAP007296	Autophagy	AutoPha	APHAG	Atg	high	APG12	Atg12	APG12		73.5123	100	98.397	15.3506		11.2846	15.3506	15.1045
AGAP002315	Autophagy	AutoPha	APHAG	Atg	high	APG16L	Atg16	-		27.8969	78.1302	100	1.05959		0.295592	0.827858	1.05959
AGAP007970	Autophagy	AutoPha	APHAG	Atg	high	APG18A	Atg18b	APG18A		0	0	0	0.108747		0.108747	0	0.0698749
AGAP005910	Autophagy	AutoPha	APHAG	Atg	high	APG18B	Atg18a	APG18B		59.1825	88.5986	100	101.369		59.9929	89.8117	101.369
AGAP004092	Autophagy	AutoPha	APHAG	Atg	high	APG2	Atg2	-		45.2996	93.447	100	36.5337		16.5496	34.1396	36.5337
AGAP011582	Autophagy	AutoPha	APHAG	Atg	high	APG3	Atg3	APG3		43.8076	62.2164	100	15.4908		6.78614	9.6378	15.4908
AGAP004023	Autophagy	AutoPha	APHAG	Atg	high	APG4A	Atg4b	APG4A		71.3479	100	69.4728	4.53599		3.23633	4.53599	3.15128
AGAP008497	Autophagy	AutoPha	APHAG	Atg	high	APG4B	Atg4a	-		56.765	100	88.634	8.0576		4.57389	8.0576	7.14177
AGAP010939	Autophagy	AutoPha	APHAG	Atg	high	APG5	Atg5	APG5		8.79768	14.6018	100	48.3947		4.25761	7.06649	48.3947
AGAP003858	Autophagy	AutoPha	APHAG	Atg	high	APG6	Atg6	APG6		41.9575	55.8067	100	7.49679		3.14547	4.18371	7.49679
AGAP002685	Autophagy	AutoPha	APHAG	Atg	high	APG8	Atg8a	APG8		37.3237	60.5256	100	271.577		101.362	164.373	271.577
AGAP001762	Autophagy	AutoPha	APHAG	Atg	high	APG9	Atg9	APG9		65.1382	100	74.9743	32.251		21.0077	32.251	24.18
AGAP005620	Effector Molecules	AntiMic	AMP	Attacin	high	null	-	DPT1		100	52.3122	12.122	1.15286		1.15286	0.603086	0.13975
AGAP000693	Effector Molecules	AntiMic	AMP	Cecropin	high	CEC1	-	CECA		100	30.5444	0.159781	21374.4		21374.4	6528.69	34.1522
AGAP000692	Effector Molecules	AntiMic	AMP	Cecropin	high	CEC2	-	-		100	51.9913	0.160116	131912		131912	68582.9	211.213
AGAP000694	Effector Molecules	AntiMic	AMP	Cecropin	high	CecB	-	CECN		100	46.5386	0.365603	5464.59		5464.59	2543.15	19.9787
AGAP006722	Effector Molecules	AntiMic	AMP	Cecropin	high	-	-	-		0	0	0	0		0	0	0
AGAP011294	Effector Molecules	AntiMic	AMP	Defensin	high	DEF1	Def	DEFA		100	23.1605	0.101122	70659.6		70659.6	16365.1	71.4526
AGAP004632	Effector Molecules	AntiMic	AMP	Defensin	high	-	-	-		28.6	100	75.7789	44.4198		12.704	44.4198	33.6608
AGAP007199	Effector Molecules	AntiMic	AMP	Defensin	high	Def3	-	-		0	0	0	0		0	0	0
AGAP005416	Effector Molecules	AntiMic	AMP	Defensin	high	DEF4	-	-		0	0	0	0.0680852		0.0680852	0	0
AGAP007200	Effector Molecules	AntiMic	AMP	Defensin	high	DEF5	-	-		0	0	0	0		0	0	0
AGAP008645	Effector Molecules	AntiMic	AMP	Gambicin	high	GAM1	-	GAM1		100	98.113	20.2094	26119.9		26119.9	25627.1	5278.68
AGAP007347	Effector Molecules	AntiMic	LYS	LYSC	high	LYSC1	-	LYSC10		100	7.48265	0.956856	1325.46		1325.46	99.1797	12.6828
AGAP007343	Effector Molecules	AntiMic	LYS	LYSC	high	LYSC2	-	LYSC10		0	0	0	0.0680852		0.0680852	0	0
AGAP007345	Effector Molecules	AntiMic	LYS	LYSC	high	LYSC3	-	LYSC10		0	0	0	0.0685995		0.0680852	0	0.0685995
AGAP007385	Effector Molecules	AntiMic	LYS	LYSC	high	LYSC4	CG16756	LYSC4		100	24.1581	1.4589	4.70214		4.70214	1.13595	0.0685995
AGAP007346	Effector Molecules	AntiMic	LYS	LYSC	high	LYSC5	-	LYSC10		100	9.77803	0	3.08645		3.08645	0.301794	0
AGAP007386	Effector Molecules	AntiMic	LYS	LYSC	high	LYSC7	CG16756	LYSC7B		100	69.5838	3.3084	4823.91		4823.91	3356.66	159.594
AGAP007344	Effector Molecules	AntiMic	LYS	LYSC	high	LYSC8	-	LYSC10		0	0	0	0.0680852		0.0680852	0	0
AGAP000274	Effector Molecules	AntiMic	LYS	LYSI	low	null	-	-		47.9423	89.5197	100	15.1548		7.26554	13.5665	15.1548
AGAP011119	Effector Molecules	AntiMic	LYS	LYS-I	high	null	CG6435	-		89.5844	69.1457	100	1.68814		1.51231	1.16728	1.68814
AGAP005717	Effector Molecules	AntiMic	LYS	LYSlong	high	LYSC6	CG8492	LYSC6		0	0	0	0.231206		0.231206	0	0
AGAP029502	Effector Molecules	EffEnzy	NO	NOS	high	null	Nos	-		0	0	0	0.363713		0.147796	0.150897	0.363713
AGAP002825	Effector Molecules	EffEnzy	PPO	PPO	high	PPO1	PPO2	PPO6		0	0	0	0.143254		0	0	0.143254
AGAP006258	Effector Molecules	EffEnzy	PPO	PPO	high	PPO2	PPO1	PPO10		0	0	0	0.0702266		0	0.0702266	0
AGAP004975	Effector Molecules	EffEnzy	PPO	PPO	high	PPO3	PPO1	-		0	0	0	0.0543736		0.0543736	0	0
AGAP004981	Effector Molecules	EffEnzy	PPO	PPO	high	PPO4	PPO1	PPO4		0	0	0	0.108747		0.108747	0	0.0685995
AGAP012616	Effector Molecules	EffEnzy	PPO	PPO	high	PPO5	PPO1	PPO4		0	0	0	0.349966		0.349966	0.077022	0.0698749
AGAP004977	Effector Molecules	EffEnzy	PPO	PPO	high	PPO6	PPO1	-		0	0	0	0.880463		0.880463	0.466282	0
AGAP004980	Effector Molecules	EffEnzy	PPO	PPO	high	PPO7	PPO1	PPO7		0	0	0	0		0	0	0
AGAP004976	Effector Molecules	EffEnzy	PPO	PPO	high	PPO8	PPO1	PPO7		0	0	0	0		0	0	0
AGAP004978	Effector Molecules	EffEnzy	PPO	PPO	high	PPO9	PPO1	PPO5		0	0	0	0.256543		0.256543	0	0
AGAP009978	Effector Molecules	EffEnzy	PRDX	DUOX	high	DUOX	Duox	DUOX		0	0	0	0.3948		0.3948	0	0.13975
AGAP008072	Effector Molecules	EffEnzy	PRDX	NOX	high	null	Nox	-		0	0	0	0		0	0	0
AGAP003248	Modulation	CascMod	CLIP	CLIP_other	high	null	-	CLIPB19		0	0	0	0.271868		0.271868	0.147249	0.0746543
AGAP011793	Modulation	CascMod	CLIP	CLIPA	high	null	-	-		0	0	0	0		0	0	0
AGAP011794	Modulation	CascMod	CLIP	CLIPA	high	null	-	-		0	0	0	0		0	0	0
AGAP011791	Modulation	CascMod	CLIP	CLIPA	high	CLIPA1	CG9377	CLIPA1		100	35.442	3.5798	8.00346		8.00346	2.83658	0.286508
AGAP006954	Modulation	CascMod	CLIP	CLIPA	high	CLIPA10	CG4998	CLIPA10		0	0	0	0.0746543		0	0	0.0746543
AGAP011781	Modulation	CascMod	CLIP	CLIPA	high	CLIPA12	-	-		100	55.6182	4.97469	1.50068		1.50068	0.834654	0.0746543
AGAP011783	Modulation	CascMod	CLIP	CLIPA	high	CLIPA13	CG5390	-		0	0	0	0		0	0	0
AGAP011788	Modulation	CascMod	CLIP	CLIPA	high	CLIPA14	CG5390	-		100	18.1633	2.79121	7.68139		7.68139	1.3952	0.214404
AGAP002815	Modulation	CascMod	CLIP	CLIPA	high	CLIPA15	mas	CLIPA15		0	0	0	0		0	0	0
AGAP003245	Modulation	CascMod	CLIP	CLIPA	high	-	-	CLIPB33		100	21.7851	0	1.01502		1.01502	0.221124	0
AGAP011790	Modulation	CascMod	CLIP	CLIPA	high	CLIPA2	CG9377	CLIPA1		100	8.82033	0	2.54266		2.54266	0.224271	0
AGAP001964	Modulation	CascMod	CLIP	CLIPA	high	CLIPA26	CG9377	CLIPA17		0	0	0	0.364724		0.310917	0.364724	0.213129
AGAP000290	Modulation	CascMod	CLIP	CLIPA	high	CLIPA27	-	CLIPA16		100	83.0451	95.8848	1.19555		1.19555	0.992847	1.14635
AGAP010730	Modulation	CascMod	CLIP	CLIPA	high	-	CG18478	-		100	64.4254	72.7986	3.41895		3.41895	2.20267	2.48895
AGAP012591	Modulation	CascMod	CLIP	CLIPA	high	CLIPA3	CG13318	CLIPA3		0	0	0	0		0	0	0
AGAP011780	Modulation	CascMod	CLIP	CLIPA	high	CLIPA4	CG40160	-		100	9.71582	2.95147	4.69171		4.69171	0.455838	0.138474
AGAP011787	Modulation	CascMod	CLIP	CLIPA	high	CLIPA5	CG5390	-		0	0	0	0.108747		0.108747	0.077022	0
AGAP011789	Modulation	CascMod	CLIP	CLIPA	high	CLIPA6	-	-		100	15.3425	6.56994	11.9319		11.9319	1.83065	0.783915
AGAP011792	Modulation	CascMod	CLIP	CLIPA	high	CLIPA7	-	-		100	33.9559	2.04237	7.07655		7.07655	2.4029	0.144529
AGAP010731	Modulation	CascMod	CLIP	CLIPA	high	CLIPA8	CG18478	-		100	32.6181	2.74382	5.26745		5.26745	1.71815	0.144529
AGAP010968	Modulation	CascMod	CLIP	CLIPA	high	CLIPA9	CG18478	-		100	27.5634	3.29128	19.4655		19.4655	5.36535	0.640662
AGAP028725	Modulation	CascMod	CLIP	CLIPA	high	SPCLIP1	-	-		100	26.4434	1.34393	5.10439		5.10439	1.34977	0.0685995
AGAP013487	Modulation	CascMod	CLIP	CLIPB	high	null	-	CLIPB33		0	0	0	0.0806703		0.079711	0.0806703	0
AGAP004149	Modulation	CascMod	CLIP	CLIPB	high	null	CG34409	CLIPB44		0	0	0	0		0	0	0
AGAP009211	Modulation	CascMod	CLIP	CLIPB	high	null	grass	-		0	0	0	0.608122		0.608122	0.0702266	0.0685995
AGAP009216	Modulation	CascMod	CLIP	CLIPB	high	null	-	-		0	0	0	0.0543736		0.0543736	0	0
AGAP009220	Modulation	CascMod	CLIP	CLIPB	high	null	-	-		0	0	0	0.134085		0.134085	0	0.0685995
AGAP011325	Modulation	CascMod	CLIP	CLIPB	high	null	-	-		0	0	0	0.526798		0.526798	0.38926	0.0698749
AGAP009849	Modulation	CascMod	CLIP	CLIPB	high	null	-	-		0	0	0	0.639244		0.639244	0.147249	0.0698749
AGAP003686	Modulation	CascMod	CLIP	CLIPB	high	null	grass	CLIPB28		0	0	0	0.356383		0	0.231567	0.356383
AGAP029770	Modulation	CascMod	CLIP	CLIPB	high	null	CG9733	-		100	8.39252	0	1.92243		1.92243	0.161341	0
AGAP003251	Modulation	CascMod	CLIP	CLIPB	high	CLIPB1	-	CLIPB1		100	24.6546	11.6696	3.1577		3.1577	0.778519	0.368492
AGAP009214	Modulation	CascMod	CLIP	CLIPB	high	CLIPB11	-	-		75.1024	100	31.0352	1.81965		1.3666	1.81965	0.564732
AGAP009217	Modulation	CascMod	CLIP	CLIPB	high	CLIPB12	-	-		100	27.1911	2.03783	7.32686		7.32686	1.99226	0.149309
AGAP004855	Modulation	CascMod	CLIP	CLIPB	high	CLIPB13	grass	CLIPB13A		100	63.8352	37.0296	1.76885		1.76885	1.12915	0.655
AGAP010833	Modulation	CascMod	CLIP	CLIPB	high	CLIPB14	-	CLIPB46		0	0	0	0.0543736		0.0543736	0	0
AGAP009844	Modulation	CascMod	CLIP	CLIPB	high	CLIPB15	-	CLIPB15		100	26.0256	13.3387	3.82699		3.82699	0.995994	0.510471
AGAP009263	Modulation	CascMod	CLIP	CLIPB	high	CLIPB16	CG17572	CLIPB16		71.1216	100	85.0872	1.33304		0.948076	1.33304	1.13424
AGAP001648	Modulation	CascMod	CLIP	CLIPB	high	CLIPB17	grass	CLIPB27		100	39.4836	16.5086	17.6819		17.6819	6.98144	2.91903
AGAP009215	Modulation	CascMod	CLIP	CLIPB	high	CLIPB18	-	-		0	0	0	0.126148		0	0.126148	0
AGAP003247	Modulation	CascMod	CLIP	CLIPB	high	CLIPB19	-	CLIPB33		0	0	0	0.310917		0.310917	0	0
AGAP003246	Modulation	CascMod	CLIP	CLIPB	high	CLIPB2	-	CLIPB33		100	18.0464	11.5966	1.20509		1.20509	0.217475	0.13975
AGAP012037	Modulation	CascMod	CLIP	CLIPB	high	CLIPB20	-	CLIPB31		0	0	0	0.783342		0.783342	0.0806703	0
AGAP003249	Modulation	CascMod	CLIP	CLIPB	high	CLIPB3	-	CLIPB33		0	0	0	0		0	0	0
AGAP013184	Modulation	CascMod	CLIP	CLIPB	high	CLIPB36	-	-		100	13.1787	0	1.59863		1.59863	0.21068	0
AGAP003250	Modulation	CascMod	CLIP	CLIPB	high	CLIPB4	-	CLIPB33		100	25.0242	4.12779	10.3265		10.3265	2.58413	0.426257
AGAP004148	Modulation	CascMod	CLIP	CLIPB	high	CLIPB5	MP1	CLIPB5		100	7.10712	14.4232	4.39331		4.39331	0.312238	0.633654
AGAP003252	Modulation	CascMod	CLIP	CLIPB	high	CLIPB6	-	CLIPB6		37.4657	25.2773	100	1.87155		0.70119	0.473077	1.87155
AGAP002270	Modulation	CascMod	CLIP	CLIPB	high	CLIPB7	-	CLIPB6		0	0	0	0.322543		0.322543	0	0.0685995
AGAP003057	Modulation	CascMod	CLIP	CLIPB	high	CLIPB8	CG9737	-		48.9748	29.2629	100	5.90538		2.89215	1.72809	5.90538
AGAP029769	Modulation	CascMod	CLIP	CLIPB	high	CLIPB9	CG9733	-		0	0	0	0.122459		0.122459	0	0
AGAP012034	Modulation	CascMod	CLIP	CLIPC	high	null	-	CLIPB31		0	0	0	0.108747		0.108747	0	0.0698749
AGAP028007	Modulation	CascMod	CLIP	CLIPC	high	null	-	CLIPB31		0	0	0	0.159422		0.159422	0	0
AGAP028167	Modulation	CascMod	CLIP	CLIPC	high	null	-	CLIPB31		0	0	0	0.134085		0.134085	0	0
AGAP008835	Modulation	CascMod	CLIP	CLIPC	high	CLIPC1	CG11843	CLIPC1		0	0	0	0		0	0	0
AGAP000572	Modulation	CascMod	CLIP	CLIPC	high	CLIPC10	psh	-		100	59.0077	78.9962	1.68706		1.68706	0.995493	1.33271
AGAP004317	Modulation	CascMod	CLIP	CLIPC	high	CLIPC2	-	-		100	17.2358	0	1.7298		1.7298	0.298146	0
AGAP004318	Modulation	CascMod	CLIP	CLIPC	high	CLIPC3	snk	CLIPC3		100	13.6424	0	3.16516		3.16516	0.431803	0
AGAP000573	Modulation	CascMod	CLIP	CLIPC	high	CLIPC4	psh	CLIPC13		100	35.1694	49.116	2.1943		2.1943	0.771724	1.07775
AGAP000571	Modulation	CascMod	CLIP	CLIPC	high	CLIPC5	psh	CLIPC5B		0	0	0	0		0	0	0
AGAP000315	Modulation	CascMod	CLIP	CLIPC	high	CLIPC6	psh	-		0	0	0	0.917426		0.917426	0.319033	0.149309
AGAP003689	Modulation	CascMod	CLIP	CLIPC	high	CLIPC7	-	CLIPE8		94.0826	15.7096	100	7.74761		7.28915	1.21712	7.74761
AGAP004719	Modulation	CascMod	CLIP	CLIPC	high	CLIPC9	psh	-		0	0	0	0.92239		0.799139	0.596291	0.92239
AGAP029106	Modulation	CascMod	CLIP	CLIPD	high	null	-	-		0	0	0	0.0680852		0.0680852	0	0
AGAP008995	Modulation	CascMod	CLIP	CLIPD	high	null	-	-		0	0	0	0		0	0	0
AGAP009000	Modulation	CascMod	CLIP	CLIPD	high	null	-	CLIPD10		0	0	0	0		0	0	0
AGAP009006	Modulation	CascMod	CLIP	CLIPD	high	null	-	CLIPE9		0	0	0	0.0806703		0.0680852	0.0806703	0
AGAP013089	Modulation	CascMod	CLIP	CLIPD	high	null	CG32260	-		0	0	0	0.0698749		0	0	0.0698749
AGAP008997	Modulation	CascMod	CLIP	CLIPD	high	null	CG8172	CLIPD9		0	0	0	0		0	0	0
AGAP002422	Modulation	CascMod	CLIP	CLIPD	high	CLIPD1	CG9372	CLIPD1		100	32.7778	12.5089	1.71401		1.71401	0.561813	0.214404
AGAP008183	Modulation	CascMod	CLIP	CLIPD	high	CLIPD2	l(2)k05911	CLIPD2		0	0	0	0.0702266		0	0.0702266	0.0698749
AGAP001433	Modulation	CascMod	CLIP	CLIPD	high	CLIPD3	CG7432	CLIPD3		0	0	0	0.147796		0.147796	0	0.143254
AGAP002811	Modulation	CascMod	CLIP	CLIPD	high	CLIPD4	CG1299	-		0	0	0	0.571159		0.571159	0	0
AGAP002813	Modulation	CascMod	CLIP	CLIPD	high	CLIPD6	CG1299	CLIPD6		100	2.18491	5.66421	21.174		21.174	0.462633	1.19934
AGAP008998	Modulation	CascMod	CLIP	CLIPD	high	CLIPD7	CG13744	-		0	0	0	0.0702266		0	0.0702266	0
AGAP002784	Modulation	CascMod	CLIP	CLIPD	high	CLIPD8	Sb	-		0	0	0	0.0543736		0.0543736	0	0
AGAP029126	Modulation	CascMod	CLIP	CLIPE	high	null	-	-		0	0	0	0		0	0	0
AGAP003691	Modulation	CascMod	CLIP	CLIPE	high	null	-	-		0	0	0	0.43129		0.43129	0.0806703	0
AGAP029093	Modulation	CascMod	CLIP	CLIPE	high	null	-	-		0	0	0	0		0	0	0
AGAP009249	Modulation	CascMod	CLIP	CLIPE	high	null	-	-		0	0	0	0		0	0	0
AGAP009251	Modulation	CascMod	CLIP	CLIPE	high	null	-	-		0	0	0	0.0681508		0.0681508	0	0
AGAP009252	Modulation	CascMod	CLIP	CLIPE	high	null	-	-		0	0	0	0.351513		0.351513	0	0
AGAP009273	Modulation	CascMod	CLIP	CLIPE	high	null	-	-		0	0	0	0.882549		0.882549	0.077022	0
AGAP011040	Modulation	CascMod	CLIP	CLIPE	high	#N/A	-	-		0	0	0	0		0	0	0
AGAP029100	Modulation	CascMod	CLIP	CLIPE	high	null	-	-		0	0	0	0		0	0	0
AGAP012020	Modulation	CascMod	CLIP	CLIPE	high	null	-	-		0	0	0	0.0702266		0	0.0702266	0
AGAP012021	Modulation	CascMod	CLIP	CLIPE	high	null	-	-		0	0	0	0.077022		0	0.077022	0
AGAP012022	Modulation	CascMod	CLIP	CLIPE	high	#N/A	-	-		0	0	0	0		0	0	0
AGAP012502	Modulation	CascMod	CLIP	CLIPE	high	null	-	-		0	0	0	0		0	0	0
AGAP028069	Modulation	CascMod	CLIP	CLIPE	high	null	-	-		0	0	0	0		0	0	0
AGAP028183	Modulation	CascMod	CLIP	CLIPE	high	null	-	-		0	0	0	0.0746543		0.0543736	0	0.0746543
AGAP028229	Modulation	CascMod	CLIP	CLIPE	high	null	-	-		0	0	0	0		0	0	0
AGAP029077	Modulation	CascMod	CLIP	CLIPE	high	null	-	-		0	0	0	0		0	0	0
AGAP028075	Modulation	CascMod	CLIP	CLIPE	high	null	-	-		0	0	0	0.0702266		0	0.0702266	0
AGAP010545	Modulation	CascMod	CLIP	CLIPE	high	null	-	-		100	24.8771	4.95028	1.50808		1.50808	0.375168	0.0746543
AGAP008091	Modulation	CascMod	CLIP	CLIPE	high	CLIPE1	-	-		0	0	0	0		0	0	0
AGAP011782	Modulation	CascMod	CLIP	CLIPE	high	CLIPE2	-	-		0	0	0	0.0543736		0.0543736	0	0
AGAP010530	Modulation	CascMod	CLIP	CLIPE	high	CLIPE4	-	-		100	35.8251	0	1.82114		1.82114	0.652426	0
AGAP028728	Modulation	CascMod	CLIP	CLIPE	high	CLIPE5	-	-		0	0	0	0.697846		0.697846	0.161341	0
AGAP011785	Modulation	CascMod	CLIP	CLIPE	high	CLIPE6	CG5390	-		0	0	0	0		0	0	0
AGAP011786	Modulation	CascMod	CLIP	CLIPE	high	CLIPE7	CG5390	-		0	0	0	0.0702266		0	0.0702266	0
AGAP010585	Modulation	CascMod	DREP	DREP	high	Drep1	Drep1	-		91.5341	100	97.4556	5.46276		5.00029	5.46276	5.32376
AGAP005254	Modulation	CascMod	DREP	DREP	high	Drep2	Drep2	-		97.1014	100	76.971	2.6643		2.58707	2.6643	2.05074
AGAP009681	Modulation	CascMod	DREP	DREP	high	-	Drep4	-		89.3208	82.8159	100	5.6556		5.05163	4.68374	5.6556
AGAP001798	Modulation	CascMod	initiator SP	ModSP	high	null	-	-		100	0	28.2973	1.73189		1.73189	0	0.490078
AGAP006909	Modulation	CascMod	SRPN	SRPN	high	SRPN1	Spn27A	-		100	0	0	1.61104		1.61104	0	0
AGAP005246	Modulation	CascMod	SRPN	SRPN	high	SRPN10	Spn42Db	SRPN10		41.0145	97.0465	100	163.304		66.9784	158.481	163.304
AGAP001377	Modulation	CascMod	SRPN	SRPN	high	SRPN11	-	-		100	19.9435	2.65334	2.5854		2.5854	0.515621	0.0685995
AGAP001375	Modulation	CascMod	SRPN	SRPN	high	SRPN12	Spn100A	SRPN12		0	0	0	0.923665		0.894231	0.739891	0.923665
AGAP028210	Modulation	CascMod	SRPN	SRPN	high	SRPN13	CG43366	-		0	0	0	0.143254		0	0.077022	0.143254
AGAP007692	Modulation	CascMod	SRPN	SRPN	high	SRPN14	-	SRPN14		0	0	0	0.348099		0.299291	0.304941	0.348099
AGAP009213	Modulation	CascMod	SRPN	SRPN	high	SRPN16	Spn28Dc	SRPN16		100	35.7107	46.2644	2.14201		2.14201	0.764928	0.990989
AGAP001376	Modulation	CascMod	SRPN	SRPN	high	SRPN17	-	SRPN17		0	0	0	0.907886		0.907886	0.150897	0
AGAP007691	Modulation	CascMod	SRPN	SRPN	high	SRPN18	-	-		50.4256	100	71.1054	7.38529		3.72408	7.38529	5.25134
AGAP004198	Modulation	CascMod	SRPN	SRPN	high	SRPN19	Spn85F	SRPN19		8.45495	40.3368	100	3.03424		0.256543	1.22391	3.03424
AGAP006911	Modulation	CascMod	SRPN	SRPN	high	SRPN2	-	-		100	11.6584	1.97793	7.30709		7.30709	0.851893	0.144529
AGAP006910	Modulation	CascMod	SRPN	SRPN	high	SRPN3	-	SRPN3		100	19.1885	13.8448	2.0096		2.0096	0.385611	0.278224
AGAP009670	Modulation	CascMod	SRPN	SRPN	high	SRPN4	Spn28Dc	SRPN4		100	8.62935	2.49152	2.80451		2.80451	0.242011	0.0698749
AGAP009221	Modulation	CascMod	SRPN	SRPN	high	SRPN5	Spn28Dc	SRPN5		0	0	0	0.758004		0.758004	0.392407	0
AGAP009212	Modulation	CascMod	SRPN	SRPN	high	SRPN6	Spn28Dc	SRPN6		38.0641	100	16.9038	303.806		115.641	303.806	51.3548
AGAP007693	Modulation	CascMod	SRPN	SRPN	high	SRPN7	-	SRPN7		0	0	0	0.336254		0.336254	0	0
AGAP003194	Modulation	CascMod	SRPN	SRPN	high	SRPN8	Spn77Ba	-		100	29.6025	25.69	2.7137		2.7137	0.803323	0.697151
AGAP003139	Modulation	CascMod	SRPN	SRPN	high	SRPN9	Spn88Ea	SRPN9		100	9.3032	0.876192	203.661		203.661	18.947	1.78446
AGAP008844	Recognition	ClasRec	GALE	GALE	high	GALE1	galectin	-		18.2965	41.9653	100	29.6952		5.43319	12.4617	29.6952
AGAP001197	Recognition	ClasRec	GALE	GALE	high	GALE10	-	GALE14		51.1559	100	94.9613	1.82335		0.932751	1.82335	1.73148
AGAP000341	Recognition	ClasRec	GALE	GALE	high	-	CG5335	GALE2		0	0	0	0.0698749		0	0	0.0698749
AGAP004934	Recognition	ClasRec	GALE	GALE	high	GALE3	Pex23	GALE3		64.6217	100	84.6412	5.9833		3.86651	5.9833	5.06433
AGAP011278	Recognition	ClasRec	GALE	GALE	high	GALE4	-	GALE11		0	0	0	0		0	0	0
AGAP011287	Recognition	ClasRec	GALE	GALE	high	GALE5	-	GALE5		28.3045	67.164	100	421.894		119.415	283.361	421.894
AGAP004806	Recognition	ClasRec	GALE	GALE	high	GALE6	-	GALE6B		34.3385	68.4215	100	45.1825		15.515	30.9146	45.1825
AGAP004807	Recognition	ClasRec	GALE	GALE	high	GALE7	-	GALE8A		24.5865	56.8697	100	268.673		66.0574	152.794	268.673
AGAP012529	Recognition	ClasRec	GALE	GALE	high	GALE8	-	GALE8A		37.598	64.9096	100	794.944		298.883	515.995	794.944
AGAP013132	Recognition	ClasRec	GALE	GALE	high	GALE9	-	GALE8A		0	0	0	0.6086		0	0	0.6086
AGAP006761	Recognition	ClasRec	GNBP	GNBPA	high	-	GNBP1	GNBPA1		0	0	0	0.176832		0.176832	0.077022	0.0746543
AGAP012409	Recognition	ClasRec	GNBP	GNBPA	high	GNBPA2	GNBP3	GNBPA2		22.5317	51.1331	100	3.00324		0.67668	1.53565	3.00324
AGAP004455	Recognition	ClasRec	GNBP	GNBPB	high	GNBPB1	-	GNBPB1		100	0	0	1.01085		1.01085	0	0
AGAP002798	Recognition	ClasRec	GNBP	GNBPB	high	GNBPB2	-	-		0	0	0	0		0	0	0
AGAP002799	Recognition	ClasRec	GNBP	GNBPB	high	GNBPB3	-	-		72.6955	100	47.1717	25.4052		18.4684	25.4052	11.9841
AGAP002796	Recognition	ClasRec	GNBP	GNBPB	high	GNBPB4	-	GNBPB4		0	0	0	0.631103		0	0.154044	0.631103
AGAP004456	Recognition	ClasRec	GNBP	GNBPB	high	GNBPB5	-	GNBPB5		0	0	0	0.0698749		0	0	0.0698749
AGAP011476	Recognition	ClasRec	PGRP	atypicalPGRP	high	null	CG9380	-		30.8364	77.1789	100	220.191		67.8992	169.941	220.191
AGAP011359	Recognition	ClasRec	PGRP	atypicalPGRP	high	null	-	-		41.0964	74.1043	100	105.416		43.3223	78.118	105.416
AGAP005205	Recognition	ClasRec	PGRP	PGRPL	high	PGRPLA	PGRP-LA	-		25.1007	52.4669	100	8.3235		2.08925	4.36708	8.3235
AGAP001212	Recognition	ClasRec	PGRP	PGRPL	high	PGRPLB	PGRP-LB	PGRPLB		64.5749	100	29.6484	1192.85		770.283	1192.85	353.661
AGAP005203	Recognition	ClasRec	PGRP	PGRPL	high	PGRPLC	PGRP-LC	PGRPLC		44.8098	100	73.1154	98.3194		44.0567	98.3194	71.8866
AGAP005552	Recognition	ClasRec	PGRP	PGRPL	high	PGRPLD	PGRP-LD	-		95.288	15.6187	100	11.5839		11.0381	1.80926	11.5839
AGAP000536	Recognition	ClasRec	PGRP	PGRPS	high	PGRPS1	PGRP-SA	PGRPS1		98.9608	41.8005	100	52.5096		51.9639	21.9493	52.5096
AGAP006343	Recognition	ClasRec	PGRP	PGRPS	high	PGRPS2	PGRP-SB1	-		100	20.6359	55.2894	1526.96		1526.96	315.101	844.246
AGAP006342	Recognition	ClasRec	PGRP	PGRPS	high	PGRPS3	PGRP-SB1	-		100	21.7027	12.6021	331.622		331.622	71.971	41.7913
AGAP009143	Recognition	ClasRec	SCR	SCRA	high	SCRAC1	bark	-		30.5524	78.9222	100	43.3237		13.2364	34.192	43.3237
AGAP004118	Recognition	ClasRec	SCR	SCRA	high	SCRAL1	Loxl2	-		0	0	0	0		0	0	0
AGAP005625	Recognition	ClasRec	SCR	SCRA	high	SCRASP1	-	-		100	72.1176	73.5948	7.52091		7.52091	5.4239	5.53499
AGAP006631	Recognition	ClasRec	SCR	SCRA	high	SCRASP2	Corin	SCRASP2		0	0	0	0.431037		0.406425	0.217475	0.431037
AGAP001979	Recognition	ClasRec	SCR	SCRA	high	SCRASP3	-	-		100	6.85187	18.9858	4.50372		4.50372	0.308589	0.855066
AGAP004845	Recognition	ClasRec	SCR	SCRB	high	null	CG3829	SCRB8		4.28762	10.0777	100	19.132		0.820305	1.92806	19.132
AGAP002451	Recognition	ClasRec	SCR	SCRB	high	SCRB1	Snmp1	SCRB1		0	0	0	0		0	0	0
AGAP000016	Recognition	ClasRec	SCR	SCRB	high	SCRB10	-	-		0	0	0	0.33834		0.33834	0	0.0746543
AGAP005716	Recognition	ClasRec	SCR	SCRB	high	SCRB16	Snmp2	-		0	0	0	0.433376		0.433376	0	0.0685995
AGAP003373	Recognition	ClasRec	SCR	SCRB	high	SCRB17	CG7227	SCRB17		0	0	0	0.631271		0.079711	0.631271	0.143254
AGAP005725	Recognition	ClasRec	SCR	SCRB	high	SCRB3	dsb	SCRB3		100	1.96537	2.65195	10.7196		10.7196	0.21068	0.284279
AGAP002738	Recognition	ClasRec	SCR	SCRB	high	SCRB5	CG40006	SCRB5		100	7.09736	2.35991	6.32689		6.32689	0.449042	0.149309
AGAP004643	Recognition	ClasRec	SCR	SCRB	high	SCRB6	CG10345	SCRB6		100	81.8477	14.2978	1.01085		1.01085	0.827357	0.144529
AGAP004847	Recognition	ClasRec	SCR	SCRB	high	SCRB7	CG2736	SCRB7		100	67.9532	20.4851	1.01085		1.01085	0.686904	0.207074
AGAP004846	Recognition	ClasRec	SCR	SCRB	high	SCRB9	emp	SCRB9		100	5.73996	8.80257	14.2956		14.2956	0.820562	1.25838
AGAP010132	Recognition	ClasRec	SCR	SCRB	high	SCRBQ1	CG31741	SCRBQ1		0	0	0	0		0	0	0
AGAP008179	Recognition	ClasRec	SCR	SCRB	high	SCRBQ3	CG31741	SCRBQ3		0	1.45269	100	19.8048		0	0.287702	19.8048
AGAP010133	Recognition	ClasRec	SCR	SCRB	high	SCRPQ2	CG31741	SCRBQ2		26.7653	66.9538	100	92.1872		24.6742	61.7229	92.1872
AGAP011974	Recognition	ClasRec	SCR	SCRC	high	SCRC1	-	-		83.6454	100	95.3476	2.24029		1.8739	2.24029	2.13607
AGAP006516	Recognition	OtheRec	CTL	CTL	low	#N/A	-	-		12.1513	100	5.80456	14.9396		1.81536	14.9396	0.867176
AGAP013382	Recognition	OtheRec	CTL	CTL	high	null	-	CTL11		0	0	0	0.0702266		0	0.0702266	0
AGAP010707	Recognition	OtheRec	CTL	CTL	high	null	-	CTL12		0	0	0	0		0	0	0
AGAP002910	Recognition	OtheRec	CTL	CTL	high	null	-	CTL12		0	0	0	0		0	0	0
AGAP012666	Recognition	OtheRec	CTL	CTL	high	null	CG6055	-		0	0	0	0.117425		0	0.117425	0.0746543
AGAP029110	Recognition	OtheRec	CTL	CTL	high	null	nw	CTL8		0	0	0	0.442247		0	0.442247	0.137199
AGAP004811	Recognition	OtheRec	CTL	CTL	high	CTL1	-	-		81.4429	74.4104	100	2.12651		1.73189	1.58234	2.12651
AGAP009316	Recognition	OtheRec	CTL	CTL	high	CTL10	CG13587	CTL10		0	0	0	0		0	0	0
AGAP010709	Recognition	OtheRec	CTL	CTL	high	CTL2	-	CTL12		0	0	0	0		0	0	0
AGAP004810	Recognition	OtheRec	CTL	CTL	high	CTL3	-	-		2.20294	4.06894	100	7.40469		0.163121	0.301293	7.40469
AGAP005335	Recognition	OtheRec	CTL	CTL	high	CTL4	-	CTLMA14		100	77.2948	33.9824	543.571		543.571	420.152	184.718
AGAP029047	Recognition	OtheRec	CTL	CTL	high	CTL5	-	-		0	0	0	0.219184		0.0543736	0	0.219184
AGAP006267	Recognition	OtheRec	CTL	CTL	high	CTL6	rgn	-		58.2251	39.6712	100	83.8397		48.8157	33.2602	83.8397
AGAP000940	Recognition	OtheRec	CTL	CTL	high	CTL7	CG15765	-		0	0	0	0.0680852		0.0680852	0	0
AGAP002625	Recognition	OtheRec	CTL	CTL	high	CTL9	CG14866	CTL9		0	0	0	0.122459		0.122459	0	0.0746543
AGAP002912	Recognition	OtheRec	CTL	CTLGA	high	null	-	CTL12		0	0	0	0		0	0	0
AGAP010196	Recognition	OtheRec	CTL	CTLGA	high	CTLGA1	CG6055	CTLGA1		100	34.7452	46.8062	1.0341		1.0341	0.3593	0.484023
AGAP006430	Recognition	OtheRec	CTL	CTLGA	high	CTLGA2	CG4115	CTLGA2		0	0	0	0.987597		0.987597	0.0702266	0.286508
AGAP010193	Recognition	OtheRec	CTL	CTLGA	high	CTLGA3	-	CTLGA3		100	1.73308	4.77306	25.3075		25.3075	0.438599	1.20794
AGAP002911	Recognition	OtheRec	CTL	CTLGA	high	CTLMA9	-	CTL12		0	0	0	0		0	0	0
AGAP000871	Recognition	OtheRec	CTL	CTLMA	high	null	Lectin-galC1	-		0	0	0	0		0	0	0
AGAP007409	Recognition	OtheRec	CTL	CTLMA	high	null	Lectin-galC1	-		0	0	0	0		0	0	0
AGAP007411	Recognition	OtheRec	CTL	CTLMA	high	CTLMA1	Lectin-galC1	-		100	4.41695	4.69543	1.58994		1.58994	0.0702266	0.0746543
AGAP005334	Recognition	OtheRec	CTL	CTLMA	high	CTLMA2	lectin-37Db	CTLGA6		100	49.0711	21.506	359.947		359.947	176.63	77.4104
AGAP007412	Recognition	OtheRec	CTL	CTLMA	high	CTLMA3	Lectin-galC1	-		0	0	0	0.742207		0.742207	0	0.0746543
AGAP007407	Recognition	OtheRec	CTL	CTLMA	high	CTLMA4	Lectin-galC1	-		7.72283	47.9783	100	1.58567		0.122459	0.760779	1.58567
AGAP007410	Recognition	OtheRec	CTL	CTLMA	high	CTLMA5	Lectin-galC1	-		0	0	0	0.258629		0.258629	0.157692	0.213129
AGAP029559	Recognition	OtheRec	CTL	CTLMA	high	CTLMA6	CG33978	-		0	0	0	0.0685995		0	0	0.0685995
AGAP010708	Recognition	OtheRec	CTL	CTLMA	high	-	-	CTL12		0	0	0	0		0	0	0
AGAP007408	Recognition	OtheRec	CTL	CTLMA	high	CTLMA8	Lectin-galC1	-		0	0	0	0		0	0	0
AGAP000929	Recognition	OtheRec	CTL	CTLSE	high	-	fw	-		0	0	0	0		0	0	0
AGAP000123	Recognition	OtheRec	CTL	CTLSE	high	CTLSE2	CG9095	-		0	0	0	0.0702266		0	0.0702266	0
AGAP010763	Recognition	OtheRec	FREP	FREP	low	null	-	-		0	0	0	0		0	0	0
AGAP010773	Recognition	OtheRec	FREP	FREP	low	null	-	-		0	0	0	0		0	0	0
AGAP011226	Recognition	OtheRec	FREP	FREP	low	null	-	-		0	0	0	0		0	0	0
AGAP012651	Recognition	OtheRec	FREP	FREP	high	null	-	-		0	0	0	0		0	0	0
AGAP029722	Recognition	OtheRec	FREP	FREP	high	null	-	-		0	0	0	0.0698749		0	0	0.0698749
AGAP029326	Recognition	OtheRec	FREP	FREP	high	null	-	-		0	0	0	0		0	0	0
AGAP029721	Recognition	OtheRec	FREP	FREP	high	null	-	-		0	0	0	0.0698749		0	0	0.0698749
AGAP011231	Recognition	OtheRec	FREP	FREP	high	null	-	-		0	0	0	0		0	0	0
AGAP029319	Recognition	OtheRec	FREP	FREP	high	null	-	-		0	0	0	0		0	0	0
AGAP011230	Recognition	OtheRec	FREP	FREP	high	null	-	-		0	0	0	0		0	0	0
AGAP029831	Recognition	OtheRec	FREP	FREP	high	null	-	-		0	0	0	0.0698749		0	0	0.0698749
AGAP029830	Recognition	OtheRec	FREP	FREP	high	null	-	-		0	0	0	0.122459		0.122459	0.0806703	0
AGAP012446	Recognition	OtheRec	FREP	FREP	high	null	-	-		0	0	0	0		0	0	0
AGAP007031	Recognition	OtheRec	FREP	FREP	high	null	sca	-		0	0	0	0.618135		0.618135	0.304941	0
AGAP012650	Recognition	OtheRec	FREP	FREP	high	null	-	-		0	0	0	0		0	0	0
AGAP012539	Recognition	OtheRec	FREP	FREP	high	null	-	-		0	0	0	0		0	0	0
AGAP001554	Recognition	OtheRec	FREP	FREP	high	null	CG9593	-		0	0	0	0		0	0	0
AGAP010761	Recognition	OtheRec	FREP	FREP	high	null	-	-		0	0	0	0		0	0	0
AGAP010811	Recognition	OtheRec	FREP	FREP	high	null	-	-		0	0	0	0.0746543		0	0	0.0746543
AGAP010531	Recognition	OtheRec	FREP	FREP	high	null	CG7668	-		0	0	0	0.188458		0.188458	0.157692	0
AGAP010772	Recognition	OtheRec	FREP	FREP	high	null	-	-		0	0	0	0		0	0	0
AGAP010775	Recognition	OtheRec	FREP	FREP	high	null	-	-		0	0	0	0.077022		0.0543736	0.077022	0
AGAP010774	Recognition	OtheRec	FREP	FREP	high	null	-	-		0	0	0	0		0	0	0
AGAP011225	Recognition	OtheRec	FREP	FREP	high	null	-	-		0	0	0	0		0	0	0
AGAP011276	Recognition	OtheRec	FREP	FREP	high	null	-	-		0	0	0	0		0	0	0
AGAP011307	Recognition	OtheRec	FREP	FREP	high	null	-	-		0	0	0	0		0	0	0
AGAP010869	Recognition	OtheRec	FREP	FREP	high	null	-	-		0	0	0	0		0	0	0
AGAP010759	Recognition	OtheRec	FREP	FREP	high	null	-	-		0	0	0	0.231066		0	0.231066	0.0698749
AGAP006790	Recognition	OtheRec	FREP	FREP	high	null	-	-		0	0	0	0		0	0	0
AGAP004999	Recognition	OtheRec	FREP	FREP	high	null	-	-		0	0	0	0		0	0	0
AGAP007041	Recognition	OtheRec	FREP	FREP	high	null	CG7668	-		0	0	0	0		0	0	0
AGAP009728	Recognition	OtheRec	FREP	FREP	high	null	-	-		0	0	0	0		0	0	0
AGAP004996	Recognition	OtheRec	FREP	FREP	high	null	-	-		0	0	0	0		0	0	0
AGAP012000	Recognition	OtheRec	FREP	FREP	high	null	CG7668	-		0	0	0	0.134085		0.134085	0	0
AGAP002005	Recognition	OtheRec	FREP	FREP	high	null	-	-		0	0	0	0		0	0	0
AGAP004998	Recognition	OtheRec	FREP	FREP	high	null	-	-		0	0	0	0		0	0	0
AGAP009556	Recognition	OtheRec	FREP	FREP	high	null	-	-		0	0	0	0.227507		0.227507	0.077022	0.0698749
AGAP011277	Recognition	OtheRec	FREP	FREP	high	null	-	-		0	0	0	0		0	0	0
AGAP004997	Recognition	OtheRec	FREP	FREP	high	null	-	-		0	0	0	0		0	0	0
AGAP006743	Recognition	OtheRec	FREP	FREP	high	null	-	-		0	0	0	0		0	0	0
AGAP010760	Recognition	OtheRec	FREP	FREP	high	null	-	-		0	0	0	0		0	0	0
AGAP009184	Recognition	OtheRec	FREP	FREP	high	null	-	-		0	0	0	0.270255		0.270255	0.140453	0
AGAP011223	Recognition	OtheRec	FREP	FREP	high	null	-	-		0	0	0	0.221124		0.190544	0.221124	0
AGAP012916	Recognition	OtheRec	FREP	FREP	high	null	-	-		0	0	0	0.364724		0.190544	0.364724	0.0746543
AGAP009042	Recognition	OtheRec	FREP	FREP	high	null	CG41520	-		0	0	0	0.0543736		0.0543736	0	0
AGAP011224	Recognition	OtheRec	FREP	FREP	high	null	-	-		0	0	0	0		0	0	0
AGAP006914	Recognition	OtheRec	FREP	FREP	high	null	CG7668	-		0	0	0	0.079711		0.079711	0	0
AGAP011197	Recognition	OtheRec	FREP	FREP	high	null	-	-		100	11.2244	20.7681	2.0586		2.0586	0.231066	0.427533
AGAP011228	Recognition	OtheRec	FREP	FREP	high	null	-	-		100	16.4735	0	1.32015		1.32015	0.217475	0
AGAP000806	Recognition	OtheRec	FREP	FREP	high	null	-	-		100	13.5258	6.35408	2.25452		2.25452	0.304941	0.143254
AGAP005848	Recognition	OtheRec	FREP	FREP	high	null	-	-		100	8.86016	0.500813	28.8589		28.8589	2.55695	0.144529
AGAP004918	Recognition	OtheRec	FREP	FREP	high	null	-	-		93.4612	100	19.3828	5981.62		5590.49	5981.62	1159.4
AGAP004916	Recognition	OtheRec	FREP	FREP	high	null	-	-		79.562	100	36.5002	36.1279		28.7441	36.1279	13.1868
AGAP004917	Recognition	OtheRec	FREP	FREP	high	null	-	-		88.0224	100	53.5636	3.15115		2.77372	3.15115	1.68787
AGAP028439	Recognition	OtheRec	FREP	FREP	high	null	-	-		4.91936	14.6662	100	1.36947		0.0673693	0.200849	1.36947
AGAP029314	Recognition	OtheRec	FREP	FREP	high	null	-	-		0	29.8262	100	3.42249		0	1.0208	3.42249
AGAP029325	Recognition	OtheRec	FREP	FREP	high	null	-	-		2.92114	20.7739	100	6.92091		0.20217	1.43774	6.92091
AGAP003878	Recognition	OtheRec	LRIM	atypicalLRR	low	null	alrm	-		100	16.1362	21.4105	3.30227		3.30227	0.53286	0.707033
AGAP013186	Recognition	OtheRec	LRIM	atypicalLRR	low	null	-	-		100	38.467	0	1.16604		1.16604	0.448541	0
AGAP002007	Recognition	OtheRec	LRIM	atypicalLRR	low	null	-	-		73.5547	100	62.5073	2.72773		2.00637	2.72773	1.70503
AGAP004458	Recognition	OtheRec	LRIM	atypicalLRR	low	null	CG32687	-		32.3273	94.3418	100	8.93356		2.88798	8.42808	8.93356
AGAP006408	Recognition	OtheRec	LRIM	atypicalLRR	low	null	-	-		31.2158	92.5428	100	1.13297		0.353665	1.04848	1.13297
AGAP011472	Recognition	OtheRec	LRIM	atypicalLRR	low	null	-	-		40.8191	92.4902	100	48.4035		19.7578	44.7685	48.4035
AGAP003591	Recognition	OtheRec	LRIM	atypicalLRR	low	null	Lrr47	-		55.1699	91.4079	100	3.02723		1.67012	2.76713	3.02723
AGAP001491	Recognition	OtheRec	LRIM	atypicalLRR	low	null	CG3040	-		49.5692	71.5699	100	21.318		10.5671	15.2572	21.318
AGAP029166	Recognition	OtheRec	LRIM	atypicalLRR	low	null	-	-		57.9378	70.0365	100	1.64726		0.95439	1.15369	1.64726
AGAP011394	Recognition	OtheRec	LRIM	atypicalLRR	low	null	CG11807	-		16.781	37.6851	100	2.40951		0.40434	0.908027	2.40951
AGAP006183	Recognition	OtheRec	LRIM	atypicalLRR	low	null	CG14762	-		71.8461	37.2179	100	2.63825		1.89548	0.981902	2.63825
AGAP007048	Recognition	OtheRec	LRIM	atypicalLRR	low	null	CG7509	-		0	0	0	0.0543736		0.0543736	0	0
AGAP007090	Recognition	OtheRec	LRIM	atypicalLRR	low	null	-	-		0	0	0	0		0	0	0
AGAP007442	Recognition	OtheRec	LRIM	atypicalLRR	low	null	-	-		0	0	0	0		0	0	0
AGAP007446	Recognition	OtheRec	LRIM	atypicalLRR	low	null	-	-		0	0	0	0.213129		0	0.0702266	0.213129
AGAP007462	Recognition	OtheRec	LRIM	atypicalLRR	low	null	-	-		0	0	0	0		0	0	0
AGAP007463	Recognition	OtheRec	LRIM	atypicalLRR	low	null	-	-		0	0	0	0		0	0	0
AGAP007464	Recognition	OtheRec	LRIM	atypicalLRR	low	null	-	-		0	0	0	0		0	0	0
AGAP002013	Recognition	OtheRec	LRIM	atypicalLRR	low	null	CG13708	-		0	0	0	0		0	0	0
AGAP013059	Recognition	OtheRec	LRIM	atypicalLRR	low	null	alrm	-		0	0	0	0		0	0	0
AGAP001470	Recognition	OtheRec	LRIM	atypicalLRR	low	null	-	-		0	0	0	0.149309		0.134085	0	0.149309
AGAP010637	Recognition	OtheRec	LRIM	atypicalLRR	low	null	-	-		0	0	0	0		0	0	0
AGAP011649	Recognition	OtheRec	LRIM	atypicalLRR	low	null	-	-		0	0	0	0		0	0	0
AGAP009228	Recognition	OtheRec	LRIM	atypicalLRR	low	null	-	-		0	0	0	0		0	0	0
AGAP008173	Recognition	OtheRec	LRIM	atypicalLRR	low	null	-	-		0	0	0	0		0	0	0
AGAP008170	Recognition	OtheRec	LRIM	atypicalLRR	low	null	-	-		0	0	0	0		0	0	0
AGAP008815	Recognition	OtheRec	LRIM	atypicalLRR	low	null	-	-		0	0	0	0.0702266		0	0.0702266	0.0698749
AGAP008593	Recognition	OtheRec	LRIM	atypicalLRR	low	null	CG18095	-		0	0	0	0.426257		0.0543736	0.0806703	0.426257
AGAP011947	Recognition	OtheRec	LRIM	atypicalLRR	low	null	-	-		0	0	0	0.0543736		0.0543736	0	0
AGAP007443	Recognition	OtheRec	LRIM	atypicalLRR	low	null	-	-		0	0	0	0.587676		0.147796	0.357928	0.587676
AGAP011229	Recognition	OtheRec	LRIM	atypicalLRR	low	null	Fili	-		0	0	0	0.077022		0	0.077022	0
AGAP011227	Recognition	OtheRec	LRIM	atypicalLRR	low	null	Fili	-		0	0	0	0.542123		0.542123	0	0.0698749
AGAP009775	Recognition	OtheRec	LRIM	atypicalLRR	low	null	CG32055	-		0	0	0	0.0702266		0.0680852	0.0702266	0.0685995
AGAP007060	Recognition	OtheRec	LRIM	atypicalLRR	low	null	rdo	-		0	0	0	0		0	0	0
AGAP004841	Recognition	OtheRec	LRIM	atypicalLRR	high	null	LRR	-		48.3798	87.8559	100	42.3204		20.4746	37.181	42.3204
AGAP000810	Recognition	OtheRec	LRIM	atypicalLRR	high	null	Lrrk	-		50.8994	75.2253	100	9.85818		5.01775	7.41585	9.85818
AGAP005693	Recognition	OtheRec	LRIM	LRIMCL	high	LRIM17	cDIP	LRIM17		100	19.6099	3.96566	3.524		3.524	0.691053	0.13975
AGAP010675	Recognition	OtheRec	LRIM	LRIMCL	high	LRIM18	-	LRIM21		48.2747	100	39.0435	6.82763		3.29602	6.82763	2.66575
AGAP011117	Recognition	OtheRec	LRIM	LRIMCL	high	LRIM19	-	LRIM19		0	0	0	0.459486		0.326242	0.459486	0.213129
AGAP002542	Recognition	OtheRec	LRIM	LRIMCL	high	LRIM20	-	LRIM20		0	0	0	0.0806703		0.079711	0.0806703	0
AGAP005744	Recognition	OtheRec	LRIM	LRIMCL	high	LRIM26	-	-		49.0289	93.0149	100	24.8399		12.1787	23.1048	24.8399
AGAP007036	Recognition	OtheRec	LRIM	LRIML	high	APL1A	cDIP	-		0	0	0	0		0	0	0
AGAP007035	Recognition	OtheRec	LRIM	LRIML	high	APL1B	cDIP	-		100	19.7401	0	1.21093		1.21093	0.23904	0
AGAP007033	Recognition	OtheRec	LRIM	LRIML	high	APL1C	cDIP	-		100	19.2539	0.186597	225.192		225.192	43.3582	0.420203
AGAP006348	Recognition	OtheRec	LRIM	LRIML	high	LRIM1	-	LRIM1		100	19.9307	10.7213	2.57128		2.57128	0.512474	0.275673
AGAP007037	Recognition	OtheRec	LRIM	LRIML	high	LRIM3	cDIP	LRIM3		0	0	0	0.0698749		0	0	0.0698749
AGAP007039	Recognition	OtheRec	LRIM	LRIML	high	LRIM4	cDIP	LRIM4		100	75.1179	12.7217	1.07846		1.07846	0.810118	0.137199
AGAP007455	Recognition	OtheRec	LRIM	LRIMS	high	LRIM10	-	LRIM10B		100	50.7957	3.64037	2.05073		2.05073	1.04169	0.0746543
AGAP007034	Recognition	OtheRec	LRIM	LRIMS	high	LRIM11	-	-		0	0	0	0		0	0	0
AGAP005496	Recognition	OtheRec	LRIM	LRIMS	high	LRIM12	-	LRIM12		100	30.5546	16.5592	1.7456		1.7456	0.533361	0.289059
AGAP013290	Recognition	OtheRec	LRIM	LRIMS	high	LRIM27	-	LRIM24		0	0	0	0		0	0	0
AGAP027997	Recognition	OtheRec	LRIM	LRIMS	high	LRIM5	-	LRIM5		0	0	0	0.268169		0.268169	0.150897	0.0698749
AGAP006327	Recognition	OtheRec	LRIM	LRIMS	high	LRIM6	-	LRIM6		1.60268	2.94169	100	188.465		3.0205	5.54407	188.465
AGAP007457	Recognition	OtheRec	LRIM	LRIMS	high	-	-	LRIM7		100	3.04247	0.922094	14.8791		14.8791	0.452691	0.137199
AGAP007454	Recognition	OtheRec	LRIM	LRIMS	high	LRIM8A	-	LRIM8		100	29.7877	13.3497	7.01687		7.01687	2.09017	0.936728
AGAP007456	Recognition	OtheRec	LRIM	LRIMS	high	LRIM8B	-	LRIM8		100	24.1279	0	2.23872		2.23872	0.540157	0
AGAP007453	Recognition	OtheRec	LRIM	LRIMS	high	LRIM9	-	LRIM9		100	28.5877	3.95245	3.47123		3.47123	0.992346	0.137199
AGAP007045	Recognition	OtheRec	LRIM	LRIMTM	high	LRIM15	alrm	LRIM15		0	0	0	0.582785		0.582785	0.077022	0.217908
AGAP028028	Recognition	OtheRec	LRIM	LRIMTM	high	LRIM16A	alrm	LRIM16		100	35.1632	17.3902	1.63638		1.63638	0.575404	0.28457
AGAP028064	Recognition	OtheRec	LRIM	LRIMTM	high	LRIM16B	alrm	LRIM16		2.88047	25.4983	100	129.03		3.71668	32.9005	129.03
AGAP013388	Recognition	OtheRec	ML	ML	high	null	Npc2e	-		0	0	0	0		0	0	0
AGAP007197	Recognition	OtheRec	ML	ML	high	null	Npc2e	-		0	0	0	0.0543736		0.0543736	0	0
AGAP007415	Recognition	OtheRec	ML	ML	high	null	Npc2e	-		0	0	0	0		0	0	0
AGAP028157	Recognition	OtheRec	ML	ML	high	null	Npc2a	-		0	0	0	0		0	0	0
AGAP002849	Recognition	OtheRec	ML	ML	high	null	Npc2e	-		0	0	0	0.144529		0	0	0.144529
AGAP012352	Recognition	OtheRec	ML	ML	high	null	Npc2g	-		100	35.8022	3.33185	2.09718		2.09718	0.750836	0.0698749
AGAP002857	Recognition	OtheRec	ML	ML	high	null	Npc2b	-		100	12.3755	13.5927	14.5648		14.5648	1.80246	1.97975
AGAP013106	Recognition	OtheRec	ML	ML	high	null	Npc2e	-		20.581	100	2.14588	6599.08		1358.16	6599.08	141.608
AGAP001956	Recognition	OtheRec	ML	ML	high	null	Npc2e	-		18.7787	100	20.249	64.0641		12.0304	64.0641	12.9723
AGAP002848	Recognition	OtheRec	ML	ML	high	null	Npc2e	-		0.575331	3.42321	100	419.023		2.41077	14.3441	419.023
AGAP028108	Recognition	OtheRec	ML	ML	high	null	Npc2a	-		14.8866	43.7754	100	11.1905		1.66589	4.8987	11.1905
AGAP002804	Recognition	OtheRec	ML	ML	high	null	Npc2e	-		0	12.6977	100	2.9011		0	0.368372	2.9011
AGAP002852	Recognition	OtheRec	ML	ML	high	null	Npc2f	-		1.9397	7.16636	100	4.10944		0.079711	0.294497	4.10944
AGAP002850	Recognition	OtheRec	ML	ML	high	null	Npc2e	-		0	5.10591	100	1.57994		0	0.0806703	1.57994
AGAP002851	Recognition	OtheRec	ML	ML	high	null	Npc2f	-		0.430163	0.415651	100	18.5304		0.079711	0.077022	18.5304
AGAP002847	Recognition	OtheRec	ML	ML	high	null	Npc2e	-		2.1536	2.53278	100	6.22607		0.134085	0.157692	6.22607
AGAP007256	Recognition	OtheRec	NIMROD	DRAPER	high	null	drpr	-		37.4478	88.7802	100	24.4603		9.15983	21.7159	24.4603
AGAP029049	Recognition	OtheRec	NIMROD	NIMA	high	null	NimA	-		0	0	0	0.143254		0	0	0.143254
AGAP009763	Recognition	OtheRec	NIMROD	NIMC	high	null	-	-		0	0	0	0		0	0	0
AGAP012386	Recognition	OtheRec	NIMROD	NIMC	high	null	-	-		0	0	0	0.326714		0.326714	0.077022	0
AGAP029055	Recognition	OtheRec	NIMROD	NIMC	high	null	NimC1	-		0	0	0	0.138474		0	0.0806703	0.138474
AGAP029054	Recognition	OtheRec	NIMROD	NIMC	high	NimB2	NimB2	-		100	18.8984	14.6939	6.80927		6.80927	1.28684	1.00055
AGAP010815	Recognition	OtheRec	TEP	TEP	high	TEP1	-	-		0	0	0	0.139358		0.139358	0.0806703	0
AGAP010819	Recognition	OtheRec	TEP	TEP	high	TEP10	-	-		0	0	0	0		0	0	0
AGAP010818	Recognition	OtheRec	TEP	TEP	high	-	-	-		0	0	0	0		0	0	0
AGAP008654	Recognition	OtheRec	TEP	TEP	high	TEP12	-	-		100	13.3639	62.7301	1.12914		1.12914	0.150897	0.708308
AGAP008407	Recognition	OtheRec	TEP	TEP	high	TEP13	Mcr	-		100	5.51918	19.6891	1.46164		1.46164	0.0806703	0.287783
AGAP008368	Recognition	OtheRec	TEP	TEP	high	TEP14	-	-		100	31.2258	2.37411	3.14452		3.14452	0.981902	0.0746543
AGAP008364	Recognition	OtheRec	TEP	TEP	high	TEP15	Tep1	-		100	34.6418	51.6247	29.766		29.766	10.3115	15.3666
AGAP010813	Recognition	OtheRec	TEP	TEP	high	TEP18	-	-		0	0	0	0		0	0	0
AGAP008366	Recognition	OtheRec	TEP	TEP	high	TEP2	Tep1	-		96.3589	100	31.2789	108.273		104.331	108.273	33.8666
AGAP010816	Recognition	OtheRec	TEP	TEP	high	TEP3	-	-		0	0	0	0.213796		0.213796	0.077022	0.0698749
AGAP010812	Recognition	OtheRec	TEP	TEP	high	TEP4	-	-		0	0	0	0.610208		0.610208	0.077022	0.0746543
AGAP010814	Recognition	OtheRec	TEP	TEP	high	TEP6	-	-		0	0	0	0.873577		0.873577	0.140453	0
AGAP010830	Recognition	OtheRec	TEP	TEP	high	TEP9	-	-		0	0	0	0		0	0	0
AGAP012340	RNAinterference	piRNA	piRNA	piRNA	high	null	qin	-		0	0	0	0.841681		0.204256	0.61353	0.841681
AGAP000628	RNAinterference	piRNA	piRNA	piRNA	high	null	qin	-		0	0	0	0		0	0	0
AGAP013360	RNAinterference	piRNA	piRNA	piRNA	high	null	qin	-		0	0	0	0		0	0	0
AGAP004243	RNAinterference	piRNA	piRNA	piRNA	high	null	-	-		0	0	0	0.217908		0	0	0.217908
AGAP011520	RNAinterference	piRNA	piRNA	piRNA	high	null	fs(1)Yb	-		54.8741	72.2547	100	3.02073		1.6576	2.18262	3.02073
AGAP012952	RNAinterference	piRNA	piRNA	piRNA	high	null	-	-		36.1061	67.146	100	20.4514		7.38419	13.7323	20.4514
AGAP010482	RNAinterference	piRNA	piRNA	piRNA	high	null	Gasz	-		57.7099	64.9472	100	4.49291		2.59286	2.91802	4.49291
AGAP003687	RNAinterference	piRNA	piRNA	piRNA	high	null	mino	-		16.3934	48.2714	100	13.9396		2.28517	6.72884	13.9396
AGAP010722	RNAinterference	piRNA	piRNA	piRNA	high	null	vret	-		27.6758	45.8636	100	3.20999		0.88839	1.47222	3.20999
AGAP005646	RNAinterference	piRNA	piRNA	piRNA	high	null	Hen1	-		33.9452	43.9887	100	2.8862		0.979727	1.2696	2.8862
AGAP010171	RNAinterference	piRNA	piRNA	piRNA	high	papi	papi	-		78.1134	100	92.7005	11.7337		9.16561	11.7337	10.8772
AGAP006939	RNAinterference	RNAi	SRRP	Armitage	high	null	armi	-		53.4197	58.8141	100	2.88627		1.54183	1.69753	2.88627
AGAP002836	RNAinterference	RNAi	SRRP	DSRNA	high	null	Dcr-1	-		100	84.5906	62.8675	1.34288		1.34288	1.13595	0.844232
AGAP012289	RNAinterference	RNAi	SRRP	DSRNA	high	null	Dcr-2	-		39.6466	100	96.439	52.987		21.0075	52.987	51.1001
AGAP009887	RNAinterference	RNAi	SRRP	DSRNA	high	null	r2d2	-		47.4283	96.0325	100	21.5729		10.2316	20.717	21.5729
AGAP008087	RNAinterference	RNAi	SRRP	DSRNA	high	null	drosha	-		56.4334	92.2576	100	4.9865		2.81405	4.60042	4.9865
AGAP002554	RNAinterference	RNAi	SRRP	DSRNA	high	null	pasha	-		81.4219	88.4158	100	3.83154		3.11971	3.38769	3.83154
AGAP009781	RNAinterference	RNAi	SRRP	DSRNA	high	loqs	loqs	loqs		43.1743	78.839	100	10.9902		4.74494	8.66457	10.9902
AGAP011717	RNAinterference	RNAi	SRRP	PAZPIWI	high	null	AGO1	AGO1b		79.2005	92.929	100	277.565		219.833	257.939	277.565
AGAP029751	RNAinterference	RNAi	SRRP	PAZPIWI	high	AGO2	AGO2	AGO2		65.7037	91.6498	100	36.6022		24.049	33.5459	36.6022
AGAP008862	RNAinterference	RNAi	SRRP	PAZPIWI	high	AGO3	AGO3	-		74.3955	73.679	100	4.46861		3.32444	3.29242	4.46861
AGAP011204	RNAinterference	RNAi	SRRP	PAZPIWI	high	null	aub	PIWI6		63.9663	76.9391	100	15.8034		10.1089	12.159	15.8034
AGAP009509	RNAinterference	RNAi	SRRP	PAZPIWI	high	piwi	aub	PIWI3		32.6501	100	94.2591	6.13707		2.00376	6.13707	5.78475
AGAP007699	RNAinterference	RNAi	SRRP	Ran	high	null	Ran	-		38.8343	65.4592	100	269.555		104.68	176.449	269.555
AGAP011888	RNAinterference	RNAi	SRRP	RanBP21	high	null	Ranbp21	-		0	0	0	0.502187		0.392714	0.428155	0.502187
AGAP004912	RNAinterference	RNAi	SRRP	Rm62	high	null	-	-		0	0	0	0.0746543		0	0	0.0746543
AGAP003047	RNAinterference	RNAi	SRRP	Rm62	high	null	bel	-		75.1467	100	98.8556	181.792		136.611	181.792	179.712
AGAP005652	RNAinterference	RNAi	SRRP	Rm62	high	null	CG10077	-		70.0684	100	86.295	5.77362		4.04548	5.77362	4.98235
AGAP005351	RNAinterference	RNAi	SRRP	Rm62	high	null	-	-		88.4839	95.9339	100	21.5184		19.0403	20.6434	21.5184
AGAP010656	RNAinterference	RNAi	SRRP	Rm62	high	null	CG6227	-		62.1114	90.6218	100	8.20805		5.09813	7.43828	8.20805
AGAP008578	RNAinterference	RNAi	SRRP	Rm62	high	null	vas	-		31.5818	83.6671	100	1.20667		0.381088	1.00959	1.20667
AGAP012045	RNAinterference	RNAi	SRRP	Rm62	high	null	mahe	-		67.1669	82.3006	100	109.727		73.7005	90.3063	109.727
AGAP007825	RNAinterference	RNAi	SRRP	Rm62	high	null	CG10333	-		71.5181	81.7294	100	7.24415		5.18088	5.9206	7.24415
AGAP004351	RNAinterference	RNAi	SRRP	Rm62	high	null	CG7878	-		61.8465	72.7759	100	6.9311		4.28664	5.04417	6.9311
AGAP012523	RNAinterference	RNAi	SRRP	Rm62	high	null	CG6418	-		40.688	68.6092	100	30.9077		12.5757	21.2055	30.9077
AGAP012358	RNAinterference	RNAi	SRRP	Rm62	high	null	CG5589	-		66.4653	79.0135	100	12.193		8.10415	9.63415	12.193
AGAP003663	RNAinterference	RNAi	SRRP	Rm62	high	null	-	-		33.7496	56.5949	100	1329.41		448.671	752.379	1329.41
AGAP002829	RNAinterference	RNAi	SRRP	Spindle_E	high	SPN-E	spn-E	-		74.1374	90.0963	100	6.17946		4.58129	5.56746	6.17946
AGAP012831	RNAinterference	RNAi	SRRP	TSN	high	null	Tudor-SN	-		0	0	0	0		0	0	0
AGAP005672	RNAinterference	RNAi	SRRP	TSN	high	null	Tudor-SN	-		0	0	0	0.438367		0.159422	0.217475	0.438367
AGAP013112	RNAinterference	RNAi	SRRP	VIG	high	null	PPYR1	-		45.5153	84.1674	100	3.54886		1.61527	2.98698	3.54886
AGAP000346	Signal Transduction	Cytokin	SPZ	SPZ	high	SPZ1	-	-		100	55.3679	47.6252	1.95684		1.95684	1.08346	0.931949
AGAP029552	Signal Transduction	Cytokin	SPZ	SPZ	high	SPZ2	NT1	SPZ2		0	0	0	0		0	0	0
AGAP008360	Signal Transduction	Cytokin	SPZ	SPZ	high	SPZ3	spz3	SPZ3A		100	11.2391	10.6677	1.34288		1.34288	0.150927	0.143254
AGAP007866	Signal Transduction	Cytokin	SPZ	SPZ	high	SPZ4	spz4	SPZ4		0	0	0	0.0702266		0	0.0702266	0.0698749
AGAP007177	Signal Transduction	Cytokin	SPZ	SPZ	high	SPZ5	spz5	SPZ5		0	0	0	0.13617		0.13617	0	0.0685995
AGAP005126	Signal Transduction	Cytokin	SPZ	SPZ	high	SPZ6	spz6	SPZ6		0	0	0	0.638111		0.295592	0.458985	0.638111
AGAP007521	Signal Transduction	PathMod	IMDMOD	UBIQUI	high	null	scny	-		100	90.8434	64.596	4.91755		4.91755	4.46726	3.17654
AGAP011487	Signal Transduction	PathMod	IMDMOD	UBIQUI	high	null	POSH	-		50.4391	100	90.6144	21.906		11.0492	21.906	19.85
AGAP008412	Signal Transduction	PathMod	IMDMOD	UBIQUI	high	null	CYLD	-		45.7723	77.9156	100	1.71491		0.784955	1.33618	1.71491
AGAP005197	Signal Transduction	PathMod	IMDMOD	UBIQUI	high	ben	ben	ben		68.9877	100	98.3205	145.947		100.685	145.947	143.496
AGAP000145	Signal Transduction	PathMod	IMDMOD	UBIQUI	high	eff	eff	eff		66.0916	89.9217	100	303.458		200.56	272.875	303.458
AGAP006937	Signal Transduction	PathMod	IMDMOD	UBIQUI	high	Uev1A	Uev1A	Uev1A		59.0395	86.1109	100	45.3709		26.7868	39.0693	45.3709
AGAP005031	Signal Transduction	PathMod	JASTMOD	PIAS	high	PIAS	Su(var)2-10	PIAS2		61.3005	100	99.37	6.29376		3.85811	6.29376	6.25411
AGAP005352	Signal Transduction	PathMod	JASTMOD	PTP61F	high	null	Ptp61F	-		73.2315	100	79.0584	13.9432		10.2108	13.9432	11.0233
AGAP004844	Signal Transduction	PathMod	JASTMOD	SOCS	high	null	Socs44A	-		100	63.0323	98.5044	1.09056		1.09056	0.687405	1.07425
AGAP029624	Signal Transduction	PathMod	JASTMOD	SOCS	high	SOCS	Socs36E	SOCS		93.7981	98.2071	100	44.3357		41.5861	43.5408	44.3357
AGAP007938	Signal Transduction	PathMod	TOLLMOD	CACT	high	cact	cact	cact		37.2636	58.25	100	2.96213		1.1038	1.72544	2.96213
AGAP006542	Signal Transduction	PathMod	TOLLMOD	CACTIN	high	null	cactin	-		0	0	0	0.85857		0.476124	0.760779	0.85857
AGAP004117	Signal Transduction	PathMod	TOLLMOD	GPRK2	high	null	-	-		83.9472	100	50.4845	5.6893		4.77601	5.6893	2.87222
AGAP008887	Signal Transduction	PathMod	TOLLMOD	HRS	high	null	Hrs	-		52.7648	100	97.4581	20.7433		10.9451	20.7433	20.216
AGAP011586	Signal Transduction	PathMod	TOLLMOD	MOP	high	null	mop	-		86.4432	100	92.3681	14.1424		12.2252	14.1424	13.0631
AGAP004232	Signal Transduction	PathMod	TOLLMOD	PELLINO	high	null	Pli	-		40.2782	78.9392	100	116.269		46.831	91.7817	116.269
AGAP011076	Signal Transduction	PathMod	TOLLMOD	UBIQUI	high	null	lwr	-		52.1666	100	92.6703	100.461		52.4072	100.461	93.0977
AGAP001944	Signal Transduction	PathMod	TOLLMOD	UBIQUI	high	null	slmb	-		49.5885	100	52.7987	2.28963		1.13539	2.28963	1.2089
AGAP006809	Signal Transduction	PathSig	IMDSIG	AKIRIN	high	akirin	akirin	-		86.5117	100	91.8742	10.4685		9.05651	10.4685	9.61789
AGAP006473	Signal Transduction	PathSig	IMDSIG	CASPAR	high	casp	casp	casp		0	0	0	0.428808		0.176832	0.147249	0.428808
AGAP007173	Signal Transduction	PathSig	IMDSIG	DEATH	high	FADD	Fadd	FADD		0	0	0	0.581621		0.433376	0.526064	0.581621
AGAP004959	Signal Transduction	PathSig	IMDSIG	DEATH	high	IMD	imd	IMD		54.4262	94.1271	100	4.41093		2.4007	4.15188	4.41093
AGAP001609	Signal Transduction	PathSig	IMDSIG	DNR1	high	null	dnr1	DNR1		45.9688	100	45.3453	4.0683		1.87015	4.0683	1.84478
AGAP009166	Signal Transduction	PathSig	IMDSIG	IKK	high	IKK1	IKKbeta	IKK1		58.0118	74.6504	100	4.13111		2.39653	3.08389	4.13111
AGAP005933	Signal Transduction	PathSig	IMDSIG	IKK	high	ikk2	key	IKK2		26.7835	66.1358	100	359.04		96.1635	237.454	359.04
AGAP006747	Signal Transduction	PathSig	IMDSIG	REL	high	REL2	Rel	REL2		97.3382	100	83.3595	25.7374		25.0523	25.7374	21.4545
AGAP011779	Signal Transduction	PathSig	IMDSIG	TAB2	high	TAB2	Tab2	tab2		64.9441	100	83.3101	57.5744		37.3912	57.5744	47.9653
AGAP013516	Signal Transduction	PathSig	IMDSIG	TAK1	high	TAK1	-	-		62.4762	99.2585	100	13.8285		8.63954	13.726	13.8285
AGAP009646	Signal Transduction	PathSig	IMDSIG	TF	high	Cad	-	cad		1.88262	1.35949	100	27.3646		0.515173	0.372021	27.3646
AGAP029053	Signal Transduction	PathSig	JASTSIG	DOME	high	DOME	dome	DOME		57.068	92.5091	100	26.4464		15.0925	24.4653	26.4464
AGAP008354	Signal Transduction	PathSig	JASTSIG	HOP	high	hop	hop	HOP		73.9874	100	51.4107	2.06536		1.52811	2.06536	1.06182
AGAP010423	Signal Transduction	PathSig	JASTSIG	STAT	high	STAT	Stat92E	-		0	0	0	0		0	0	0
AGAP000099	Signal Transduction	PathSig	JASTSIG	STAT	high	STAT2	Stat92E	STAT		56.5362	93.064	100	38.8452		21.9616	36.1509	38.8452
AGAP013506	Signal Transduction	PathSig	JASTSIG	UPD	high	UPD3A	-	-		51.0943	85.4416	100	3.13292		1.60074	2.67682	3.13292
AGAP001002	Signal Transduction	PathSig	TOLL	TOLL	high	null	-	-		0	0	0	0.29135		0.122459	0.29135	0.0685995
AGAP013027	Signal Transduction	PathSig	TOLL	TOLL	high	null	-	-		0	0	0	0.298146		0	0.298146	0.0698749
AGAP012385	Signal Transduction	PathSig	TOLL	TOLL	high	null	Tollo	TOLL8		0	0	0	0.0680852		0.0680852	0	0
AGAP011187	Signal Transduction	PathSig	TOLL	TOLL	high	TOLL10	-	TOLL10		100	11.2389	85.6372	1.40309		1.40309	0.157692	1.20157
AGAP011186	Signal Transduction	PathSig	TOLL	TOLL	high	TOLL11	-	TOLL11		73.4355	100	60.7497	2.42958		1.78418	2.42958	1.47597
AGAP001004	Signal Transduction	PathSig	TOLL	TOLL	high	TOLL1A	Tl	TOLL5A		0	0	0	0.381963		0	0.381963	0.149309
AGAP010636	Signal Transduction	PathSig	TOLL	TOLL	high	-	-	-		0	0	0	0		0	0	0
AGAP000999	Signal Transduction	PathSig	TOLL	TOLL	high	TOLL5A	-	-		0	0	0	0.286508		0.122459	0.147249	0.286508
AGAP010669	Signal Transduction	PathSig	TOLL	TOLL	high	TOLL5B	-	-		0	0	0	0.0543736		0.0543736	0	0
AGAP012387	Signal Transduction	PathSig	TOLL	TOLL	high	TOLL6	Toll-6	TOLL6		0	0	0	0.835155		0.122459	0.835155	0.13975
AGAP012326	Signal Transduction	PathSig	TOLL	TOLL	high	TOLL7	Toll-7	TOLL7		100	9.25145	8.29759	5.07953		5.07953	0.46993	0.421478
AGAP006974	Signal Transduction	PathSig	TOLL	TOLL	high	TOLL9	Toll-9	TOLL9A		27.4295	100	98.5157	6.60285		1.81113	6.60285	6.50485
AGAP005252	Signal Transduction	PathSig	TOLLSIG	DEATH	high	MYD	Myd88	MYD		36.0067	99.7397	100	31.3478		11.2873	31.2662	31.3478
AGAP002966	Signal Transduction	PathSig	TOLLSIG	DEATH	high	PELLE	pll	PELLE		56.6107	100	66.2429	8.19993		4.64203	8.19993	5.43187
AGAP003062	Signal Transduction	PathSig	TOLLSIG	DEATH	high	TUBE	-	TUBE		67.125	74.1195	100	2.33709		1.56877	1.73224	2.33709
AGAP009515	Signal Transduction	PathSig	TOLLSIG	REL	high	REL1	dl	REL1A		33.9612	48.7282	100	7.58014		2.57431	3.69366	7.58014
AGAP003004	Signal Transduction	PathSig	TOLLSIG	TRAF6	high	null	Traf6	-		39.2343	75.5304	100	4.75066		1.86389	3.58819	4.75066
AGAP028526	Stress	CaspaseSig	BCL2	Bcl2	high	null	Buffy	-		20.4733	19.8053	100	8.30724		1.70077	1.64527	8.30724
AGAP011552	Stress	CaspaseSig	BCL2	Bcl2	high	DEBCL	Debcl	DEBCL		88.8326	100	44.7244	2.40478		2.13623	2.40478	1.07552
AGAP029817	Stress	CaspaseSig	CASP	CASP	high	null	Decay	CASPS19		0	0	0	0.0233142		0.0233142	0	0
AGAP029816	Stress	CaspaseSig	CASP	CASP	high	null	Decay	CASPS19		63.8559	100	84.9647	147.005		93.8713	147.005	124.902
AGAP012945	Stress	CaspaseSig	CASP	CASP	high	null	Decay	CASPS19		23.1441	73.255	100	8.4836		1.96345	6.21466	8.4836
AGAP010827	Stress	CaspaseSig	CASP	CASP	high	CASPS10	Damm	CASPS21		25.707	61.6364	100	1.37575		0.353665	0.847964	1.37575
AGAP011693	Stress	CaspaseSig	CASP	CASPL	high	CASPL1	Dredd	Dredd		0	0	0	0.137199		0	0	0.137199
AGAP004754	Stress	CaspaseSig	CASP	CASPL	high	CASPL2	Dronc	Dronc		43.7568	78.908	100	12.6979		5.55618	10.0196	12.6979
AGAP011949	Stress	CaspaseSig	CASP	CASPS	high	CASPS1	Decay	CASPS19		0	0	0	0.29135		0.268169	0.29135	0.0698749
AGAP010829	Stress	CaspaseSig	CASP	CASPS	high	CASPS12	Damm	CASPS21		35.5586	71.583	100	7.96414		2.83193	5.70096	7.96414
AGAP010826	Stress	CaspaseSig	CASP	CASPS	high	CASPS13	Damm	CASPS21		22.9248	37.6975	100	22.0561		5.05633	8.31461	22.0561
AGAP012544	Stress	CaspaseSig	CASP	CASPS	high	CASPS14	Decay	CASPS19		0	0	0	0		0	0	0
AGAP011950	Stress	CaspaseSig	CASP	CASPS	high	CASPS2	Decay	CASPS19		0	0	0	0.0746543		0	0.0702266	0.0746543
AGAP011952	Stress	CaspaseSig	CASP	CASPS	high	CASPS3	Decay	CASPS19		7.11134	34.4595	100	43.0068		3.05836	14.8199	43.0068
AGAP011951	Stress	CaspaseSig	CASP	CASPS	high	-	Decay	CASPS19		0	0	0	0		0	0	0
AGAP004921	Stress	CaspaseSig	CASP	CASPS	high	CASPS5	Decay	CASPS19		56.9871	100	95.8656	2.57883		1.4696	2.57883	2.47221
AGAP004920	Stress	CaspaseSig	CASP	CASPS	high	CASPS6	Decay	CASPS19		36.3459	65.9066	100	28.4407		10.337	18.7443	28.4407
AGAP000830	Stress	CaspaseSig	CASP	CASPS	high	CASPS7	Dcp-1	CASPS7		64.7867	79.9609	100	4.306		2.78972	3.44312	4.306
AGAP009832	Stress	CaspaseSig	CASP	CASPS	high	CASPS8	-	CASPS8		46.963	89.1252	100	7.70068		3.61647	6.86325	7.70068
AGAP010828	Stress	CaspaseSig	CASP	CASPS	high	CASPS9	Damm	CASPS21		0	0	0	0.106312		0	0.0748	0.106312
AGAP010737	Stress	CaspaseSig	CASPA	ARK	high	null	Dark	ARK		4.40328	37.6327	100	35.2211		1.55089	13.2546	35.2211
AGAP001014	Stress	CaspaseSig	CASPA	MichelobX	high	null	-	-		0	0	0	0.159422		0.159422	0.077022	0
AGAP012677	Stress	CaspaseSig	IAP	IAP	high	null	Diap1	-		0	0	0	0.367592		0.217095	0.367592	0.125008
AGAP008883	Stress	CaspaseSig	IAP	IAP	high	null	CIAPIN1	-		52.1802	89.5447	100	27.268		14.2285	24.417	27.268
AGAP007294	Stress	CaspaseSig	IAP	IAP	high	-	Diap1	IAP1		56.3462	100	95.9112	111.795		62.992	111.795	107.223
AGAP011326	Stress	CaspaseSig	IAP	IAP	high	IAP2	Diap2	IAP2		38.7568	76.245	100	125.385		48.5951	95.5995	125.385
AGAP007292	Stress	CaspaseSig	IAP	IAP	high	IAP3	Diap1	-		0	0	0	0.147249		0	0.147249	0
AGAP007291	Stress	CaspaseSig	IAP	IAP	high	IAP4	Diap1	-		0	0	0	0.487949		0.282281	0.487949	0.373353
AGAP008420	Stress	CaspaseSig	IAP	IAP	high	IAP5	Det	IAP5		46.059	68.3391	100	1.89904		0.874679	1.29779	1.89904
AGAP002651	Stress	CaspaseSig	IAP	IAP	high	IAP6	Bruce	IAP6		76.0576	100	90.5902	18.0543		13.7316	18.0543	16.3554
AGAP007293	Stress	CaspaseSig	IAP	IAP	high	IAP7	Diap1	-		0	0	0	0		0	0	0
AGAP013034	Stress	CaspaseSig	IAP	IAP	high	IAP8	-	-		0	0	0	0.079711		0.079711	0	0
AGAP004904	Stress	Ox-Stress	CAT	CAT	high	CAT1	CG9314	Cat		23.8231	100	22.4027	3.53193		0.841414	3.53193	0.791246
AGAP012702	Stress	Ox-Stress	GST	GST_other	high	null	-	GSTD3		0	0	0	0		0	0	0
AGAP008668	Stress	Ox-Stress	GST	GST_other	high	null	CG10428	-		49.0012	83.4867	100	73.9756		36.2489	61.7598	73.9756
AGAP012838	Stress	Ox-Stress	GST	GST_other	high	null	-	GSTD3		13.0186	21.7165	100	2.35984		0.307218	0.512474	2.35984
AGAP004383	Stress	Ox-Stress	GST	GSTD	high	GSTD10	-	GSTD3		2.79983	71.9186	100	213.7		5.98324	153.69	213.7
AGAP004378	Stress	Ox-Stress	GST	GSTD	high	GSTD11	-	GSTD11		34.9398	95.4077	100	1357.9		474.449	1295.54	1357.9
AGAP004380	Stress	Ox-Stress	GST	GSTD	high	GSTD12	-	GSTD3		12.4394	47.568	100	12.7215		1.58248	6.05138	12.7215
AGAP004164	Stress	Ox-Stress	GST	GSTD	high	GSTD1-4	GstD7	GSTD1		100	51.1781	1.24589	1947		1947	996.441	24.2575
AGAP004165	Stress	Ox-Stress	GST	GSTD	high	GSTD2	GstD7	GSTD5		0	0	0	0.079711		0.079711	0	0
AGAP004382	Stress	Ox-Stress	GST	GSTD	high	GSTD3	-	GSTD3		2.98935	41.7058	100	610.862		18.2608	254.765	610.862
AGAP004381	Stress	Ox-Stress	GST	GSTD	high	GSTD4	-	GSTD3		0	0	0	0.0806703		0	0.0806703	0.0698749
AGAP004173	Stress	Ox-Stress	GST	GSTD	high	GSTD5	-	GSTD3		0	0	0	0.214404		0	0	0.214404
AGAP004379	Stress	Ox-Stress	GST	GSTD	high	GSTD6	-	GSTD6		22.5896	70.4085	100	36.5865		8.26476	25.76	36.5865
AGAP004163	Stress	Ox-Stress	GST	GSTD	high	GSTD7	GstD11	GSTD7		100	27.5378	22.4468	1.91034		1.91034	0.526064	0.428808
AGAP004171	Stress	Ox-Stress	GST	GSTD	high	GSTD8	-	-		0	0	0	0.221124		0	0.221124	0.0685995
AGAP004172	Stress	Ox-Stress	GST	GSTD	high	GSTD9	-	-		0	0	0	0		0	0	0
AGAP009195	Stress	Ox-Stress	GST	GSTE	high	GSTE1	GstE12	-		38.2333	100	5.63689	45.202		17.2822	45.202	2.54799
AGAP009194	Stress	Ox-Stress	GST	GSTE	high	GSTE2	GstE12	-		100	83.2297	5.08047	102.623		102.623	85.4127	5.21373
AGAP009197	Stress	Ox-Stress	GST	GSTE	high	GSTE3	GstE12	-		50.6279	100	82.2736	103.376		52.3371	103.376	85.0511
AGAP009193	Stress	Ox-Stress	GST	GSTE	high	GSTE4	GstE12	GSTE4		88.3746	100	0.900122	88.9663		78.6236	88.9663	0.800805
AGAP009192	Stress	Ox-Stress	GST	GSTE	high	GSTE5	GstE12	-		34.6365	100	20.617	9.71844		3.36613	9.71844	2.00365
AGAP009191	Stress	Ox-Stress	GST	GSTE	high	GSTE6	GstE12	GSTE1		85.4621	100	57.9498	4.64849		3.9727	4.64849	2.69379
AGAP009196	Stress	Ox-Stress	GST	GSTE	high	GSTE7	GstE12	-		6.30923	19.9145	100	5.17836		0.326714	1.03124	5.17836
AGAP009190	Stress	Ox-Stress	GST	GSTE	high	GSTE8	GstE14	GSTE8		44.4412	54.7859	100	12.1378		5.3942	6.64981	12.1378
AGAP005749	Stress	Ox-Stress	GST	GSTO	high	GSTO1	GstO1	GSTO1		39.8358	81.6198	100	172.169		68.5849	140.524	172.169
AGAP010404	Stress	Ox-Stress	GST	GSTS	high	GSTS1	GstS1	GSTS1		62.5073	100	64.1707	931.472		582.238	931.472	597.732
AGAP000761	Stress	Ox-Stress	GST	GSTT	high	GSTT1	GstT4	GSTT1		26.5021	64.4227	100	3.4021		0.901629	2.19172	3.4021
AGAP000888	Stress	Ox-Stress	GST	GSTT	high	GSTT2	GstT4	-		37.3665	100	95.4032	72.304		27.0175	72.304	68.9803
AGAP000947	Stress	Ox-Stress	GST	GSTU	high	GSTU1	gfzf	GSTI1		44.8675	76.7166	100	126.611		56.8073	97.1317	126.611
AGAP003257	Stress	Ox-Stress	GST	GSTU	high	GSTU2	-	GSTX1		4.16257	76.7552	100	13.5436		0.563762	10.3954	13.5436
AGAP009342	Stress	Ox-Stress	GST	GSTU	high	GSTU3	-	GSTX2		0	0	0	0		0	0	0
AGAP002898	Stress	Ox-Stress	GST	GSTZ	high	GSTZ1	GstZ2	GSTZ1		0	0	0	0.788695		0.256543	0.529713	0.788695
AGAP004247	Stress	Ox-Stress	PRDX	GPX	high	GPXH1	PHGPx	GPXH1		51.5988	100	93.6659	373.07		192.5	373.07	349.439
AGAP000804	Stress	Ox-Stress	PRDX	GPX	high	-	-	GPXH2		0	0	0	0.647992		0.122459	0.140453	0.647992
AGAP004248	Stress	Ox-Stress	PRDX	GPX	high	GPXH3	-	GPXH3		0	0	0	0		0	0	0
AGAP029194	Stress	Ox-Stress	PRDX	HPX	high	null	-	-		0	0	0	0		0	0	0
AGAP029167	Stress	Ox-Stress	PRDX	HPX	high	null	-	-		0	0	0	0.079711		0.079711	0	0
AGAP003233	Stress	Ox-Stress	PRDX	HPX	high	null	-	-		0	0	0	0		0	0	0
AGAP013304	Stress	Ox-Stress	PRDX	HPX	high	null	-	-		0	0	0	0		0	0	0
AGAP008350	Stress	Ox-Stress	PRDX	HPX	high	DBLOX	CG10211	-		100	4.79829	5.33736	6.72492		6.72492	0.322681	0.358933
AGAP010734	Stress	Ox-Stress	PRDX	HPX	high	HPX1	Pxd	HPX1		0	0	0	0.0685995		0	0	0.0685995
AGAP013282	Stress	Ox-Stress	PRDX	HPX	high	HPX10	-	-		0	0	0	0		0	0	0
AGAP010899	Stress	Ox-Stress	PRDX	HPX	high	HPX11	-	-		0	0	0	0.0680852		0.0680852	0	0
AGAP029195	Stress	Ox-Stress	PRDX	HPX	high	HPX12	-	-		0	0	0	0		0	0	0
AGAP010810	Stress	Ox-Stress	PRDX	HPX	high	HPX14	-	-		0	0	0	0		0	0	0
AGAP013327	Stress	Ox-Stress	PRDX	HPX	high	HPX15	-	-		0.160035	6.75311	100	142.161		0.227507	9.60028	142.161
AGAP011216	Stress	Ox-Stress	PRDX	HPX	high	-	CG4009	-		0	0	0	0.0685995		0	0	0.0685995
AGAP009033	Stress	Ox-Stress	PRDX	HPX	high	HPX2	Irc	HPX2		100	16.955	10.4624	6.72128		6.72128	1.13959	0.703206
AGAP003714	Stress	Ox-Stress	PRDX	HPX	high	HPX3	CG42331	-		0	0	0	0		0	0	0
AGAP007237	Stress	Ox-Stress	PRDX	HPX	high	-	-	-		0	0	0	0		0	0	0
AGAP000051	Stress	Ox-Stress	PRDX	HPX	high	-	cysu	HPX5		0	0	0	0.0543736		0.0543736	0	0
AGAP003502	Stress	Ox-Stress	PRDX	HPX	high	HPX6	cd	-		0	0	0	0.357658		0.134085	0.298146	0.357658
AGAP004036	Stress	Ox-Stress	PRDX	HPX	high	HPX7	Pxt	-		0	0	0	0		0	0	0
AGAP004038	Stress	Ox-Stress	PRDX	HPX	high	HPX8	Pxt	HPX8A		100	24.3861	3.45616	4.04351		4.04351	0.986052	0.13975
AGAP001325	Stress	Ox-Stress	PRDX	TPX	high	null	Prx5	Prx5		100	72.1289	40.9557	325.628		325.628	234.872	133.363
AGAP000396	Stress	Ox-Stress	PRDX	TPX	high	TPX1	Prx3	TPX1		31.5651	64.4801	100	96.9864		30.6138	62.5369	96.9864
AGAP011054	Stress	Ox-Stress	PRDX	TPX	high	TPX2	Jafrac1	-		20.57	19.1414	100	364.739		75.0269	69.8162	364.739
AGAP007543	Stress	Ox-Stress	PRDX	TPX	high	TPX3	Jafrac2	-		100	86.0578	55.8859	194.115		194.115	167.051	108.483
AGAP011824	Stress	Ox-Stress	PRDX	TPX	high	TPX4	Prx2540-1	TPX4		3.30894	100	71.5957	2839.96		93.9726	2839.96	2033.29
AGAP007020	Stress	Ox-Stress	PRDX	TPX	high	TPX5	Prx6005	TPX5		42.1635	76.8041	100	41.4364		17.471	31.8249	41.4364
AGAP007497	Stress	Ox-Stress	SOD	SODCuZn	high	CuSOD1	CG5948	-		0	0	0	0.579086		0.579086	0.522917	0.352879
AGAP005234	Stress	Ox-Stress	SOD	SODCuZn	high	CuSOD2	Sod3	CUSOD2		57.6243	80.1245	100	17.3212		9.98122	13.8785	17.3212
AGAP010347	Stress	Ox-Stress	SOD	SODCuZn	high	CuSOD3	Sod1	CUSOD4		56.3377	98.0723	100	562.197		316.729	551.36	562.197
AGAP010517	Stress	Ox-Stress	SOD	SODMnFe	high	MnSOD1	Sod2	-		41.1223	69.2593	100	68.6485		28.2298	47.5455	68.6485

## Sheet: Body
Gene ID	SubClass	Superfamily	Family	Subfamily	Confidence	VB Symbol	Dmel Ortholog		Relative Expression						Max TPM		TPM
									Head	Thorax	Abdomen	Gut	MTs	Ovaries			Head	Thorax	Abdomen	Gut	MTs	Ovaries
AAEL022443	Autophagy	AutoPha	APHAG	Aphag_other	high	-	Aduk		78.7476	40.7222	40.4743	28.5684	28.0046	100	12.3379		9.71576	5.02424	4.99366	3.52473	3.45516	12.3379
AAEL020638	Autophagy	AutoPha	APHAG	Aphag_other	high	-	Tor		47.8175	29.1803	18.6686	16.5502	18.5224	100	34.6134		16.5513	10.1003	6.46184	5.72858	6.41122	34.6134
AAEL012306	Autophagy	AutoPha	APHAG	Aphag_other	high	APG7B	Uba3		27.9753	18.2973	13.082	10.1633	17.3449	100	56.8718		15.9101	10.406	7.43996	5.78008	9.86438	56.8718
AAEL010641	Autophagy	AutoPha	APHAG	Aphag_other	high	APG7A	Uba2		17.1018	5.96146	4.71277	5.39597	7.75826	100	200.524		34.2932	11.9542	9.45025	10.8202	15.5572	200.524
AAEL013995	Autophagy	AutoPha	APHAG	Atg	high	APG18B	Atg18a		100	61.092	34.1653	27.1375	59.3153	78.8738	53.9595		53.9595	32.9649	18.4354	14.6433	32.0062	42.5599
AAEL010427	Autophagy	AutoPha	APHAG	Atg	high	APG6	Atg6		100	54.7753	23.3432	12.4025	39.0332	94.5047	21.2033		21.2033	11.6142	4.94953	2.62973	8.27633	20.0381
AAEL013063	Autophagy	AutoPha	APHAG	Atg	high	APG18A	Atg18b		100	45.9251	4.85358	4.82688	4.49817	69.9287	77.1822		77.1822	35.446	3.7461	3.7255	3.47179	53.9725
AAEL003777	Autophagy	AutoPha	APHAG	Atg	high	-	Atg2		56.2875	100	56.0429	27.2786	33.9593	56.9676	106.567		59.984	106.567	59.7233	29.0701	36.1895	60.7088
AAEL005985	Autophagy	AutoPha	APHAG	Atg	high	-	Atg13		75.0273	62.7677	40.5207	100	82.4421	91.4946	169.344		127.054	106.293	68.6195	169.344	139.611	154.941
AAEL009089	Autophagy	AutoPha	APHAG	Atg	high	APG12	Atg12		90.7992	44.5044	20.7503	34.145	82.8483	100	11.6289		10.559	5.17538	2.41303	3.9707	9.63437	11.6289
AAEL009105	Autophagy	AutoPha	APHAG	Atg	high	APG9	Atg9		59.6758	60.5559	20.6252	18.0634	55.0294	100	88.8318		53.011	53.7928	18.3218	16.046	48.8836	88.8318
AAEL000955	Autophagy	AutoPha	APHAG	Atg	high	APG3	Atg3		48.588	28.5059	19.7831	20.0811	39.39	100	65.8018		31.9718	18.7574	13.0177	13.2137	25.9193	65.8018
AAEL018348	Autophagy	AutoPha	APHAG	Atg	high	-	Atg17		41.5644	41.3795	24.7616	11.8277	33.5692	100	105.311		43.7719	43.5772	26.0767	12.4559	35.3521	105.311
AAEL010516	Autophagy	AutoPha	APHAG	Atg	high	APG4A	Atg4b		21.8187	16.182	4.64143	8.09381	31.4607	100	32.2504		7.03664	5.21877	1.49688	2.61029	10.1462	32.2504
AAEL007162	Autophagy	AutoPha	APHAG	Atg	high	APG8	Atg8a		80.0013	55.4253	20.8699	30.3473	29.7104	100	159.955		127.966	88.6557	33.3825	48.5421	47.5234	159.955
AAEL019779	Autophagy	AutoPha	APHAG	Atg	high	-	Atg16		31.2255	11.9776	17.1497	12.7006	21.7967	100	36.5445		11.4112	4.37717	6.26728	4.64138	7.96552	36.5445
AAEL007228	Autophagy	AutoPha	APHAG	Atg	high	APG4B	Atg4a		23.4924	10.3227	13.7844	19.7634	16.7453	100	2.74228		0.644228	0.283077	0.378007	0.541966	0.459204	2.74228
AAEL023227	Autophagy	AutoPha	APHAG	Atg	high	-	Atg4a		19.2449	24.2174	18.2245	15.4874	13.0351	100	16.1401		3.10616	3.90871	2.94145	2.49969	2.10389	16.1401
AAEL021061	Autophagy	AutoPha	APHAG	Atg	high	-	Atg10		26.7988	16.2216	23.3494	8.38452	13.0252	100	10.8632		2.91121	1.76218	2.53649	0.910826	1.41495	10.8632
AAEL019922	Autophagy	AutoPha	APHAG	Atg	high	-	Atg1		56.3275	52.0237	10.8665	7.98856	12.8166	100	69.8641		39.3527	36.3459	7.59176	5.58114	8.95417	69.8641
AAEL009814	Autophagy	AutoPha	APHAG	Atg	high	-	Atg7		45.0359	14.2183	5.1238	5.06876	12.3889	100	46.7219		21.0416	6.64308	2.39394	2.36822	5.78832	46.7219
AAEL002286	Autophagy	AutoPha	APHAG	Atg	high	APG5	Atg5		47.603	24.186	9.46284	10.4731	12.2213	100	25.6994		12.2337	6.21564	2.43189	2.69153	3.14079	25.6994
AAEL027731	Autophagy	AutoPha	APHAG	Atg	high	-	Atg14		44.728	46.1666	19.8659	15.4632	11.5142	100	45.4106		20.3112	20.9645	9.02122	7.02191	5.22868	45.4106
AAEL004833	Effector Molecules	AntiMic	AMP	Attacin	high	DPT1	DptA		45.0503	58.3237	100	0.494596	9.05516	1.82702	8.6177		3.8823	5.02616	8.6177	0.0426228	0.780347	0.157447
AAEL003389	Effector Molecules	AntiMic	AMP	Attacin	high	ATT	AttA		0	0.0875902	0	1.18946	100	0	98.2391		0	0.0860478	0	1.16852	98.2391	0
AAEL027281	Effector Molecules	AntiMic	AMP	Attacin	high	-	AttA		0	0	0	0	0	0	0		0	0	0	0	0	0
AAEL024595	Effector Molecules	AntiMic	AMP	Cathelicidin	high	-	Camp		24.7332	5.17499	15.3473	8.41687	31.3349	100	1.91953		0.474761	0.0993352	0.294596	0.161564	0.601481	1.91953
AAEL012805	Effector Molecules	AntiMic	AMP	Cathelicidin	high	-	Camp		0	0	0	0	0	0	0.298751		0.0967722	0	0	0	0	0.298751
AAEL029041	Effector Molecules	AntiMic	AMP	Cecropin	high	-	-		100	90.4742	90.8298	12.5509	16.9721	1.80561	28.2321		28.2321	25.5428	25.6432	3.54338	4.79159	0.509763
AAEL029044	Effector Molecules	AntiMic	AMP	Cecropin	high	CECE	-		61.955	75.0855	100	1.45535	87.405	0.573195	40.9248		25.355	30.7286	40.9248	0.595598	35.7703	0.234579
AAEL029047	Effector Molecules	AntiMic	AMP	Cecropin	high	CECN	-		29.8974	64.3716	98.832	5.53864	100	2.51913	107.83		32.2383	69.4116	106.57	5.97229	107.83	2.71637
AAEL029038	Effector Molecules	AntiMic	AMP	Cecropin	high	CECA	-		17.8174	85.4824	15.3911	4.36887	100	0.475163	94.8926		16.9074	81.1165	14.6051	4.14574	94.8926	0.450895
AAEL029046	Effector Molecules	AntiMic	AMP	Cecropin	high	CECD	-		4.73176	3.44717	3.79708	2.39312	100	0.318941	128.641		6.08698	4.43447	4.8846	3.07853	128.641	0.41029
AAEL003841	Effector Molecules	AntiMic	AMP	Defensin	high	DEFA	Def		84.3266	100	23.7249	8.6914	26.7388	0.236505	147		124.066	147.126	34.9054	12.7873	39.3396	0.347959
AAEL003832	Effector Molecules	AntiMic	AMP	Defensin	high	DEFC	Def		54.1517	100	47.475	4.69788	19.877	0.111393	148.113		80.2056	148.113	70.3166	6.95817	29.4405	0.164987
AAEL003857	Effector Molecules	AntiMic	AMP	Defensin	high	DEFD	Def		18.1809	100	20.0416	1.9721	10.2729	0.0934633	313.971		57.0826	313.971	62.9247	6.19183	32.254	0.293448
AAEL004522	Effector Molecules	AntiMic	AMP	Gambicin	high	GAM1	-		0.838487	2.75867	0.0112268	89.4438	100	0.441895	2127.16		17.836	58.6814	0.238811	1902.61	2127.16	9.39981
AAEL017536	Effector Molecules	AntiMic	AMP	Holotricin	high	GRRP	-		100	66.0183	91.8198	0.0986915	0.736557	0.598668	2823.91		2823.91	1864.3	2592.91	2.78696	20.7997	16.9058
AAEL017132	Effector Molecules	AntiMic	LYS	LYSC	high	LYSC4	CG11159		92.2758	62.8864	100	6.87825	57.7347	4.42065	171.643		158.385	107.94	171.643	11.806	99.0976	7.58774
AAEL003712	Effector Molecules	AntiMic	LYS	LYSC	high	LYSC10	-		10.7756	0	0	22.2368	100	19.2437	1.33488		0.143842	0	0	0.296836	1.33488	0.25688
AAEL003723	Effector Molecules	AntiMic	LYS	LYSC	high	LYSC11	-		14.2731	26.6777	14.8743	15.059	100	19.7192	159.493		22.7646	42.549	23.7234	24.018	159.493	31.4508
AAEL015404	Effector Molecules	AntiMic	LYS	LYSC	high	LYSC7B	CG11159		13.5739	23.866	42.536	80.9582	100	18.6312	166.327		22.5771	39.6955	70.7487	134.655	166.327	30.9886
AAEL001485	Effector Molecules	AntiMic	LYS	LYSI	high	-	CG14823		39.8903	72.1216	100	0.362059	3.07887	3.70343	56.7099		22.6218	40.9001	56.7099	0.205323	1.74602	2.10021
AAEL025888	Effector Molecules	AntiMic	LYS	LYSI	high	-	CG6421		34.2872	56.8845	100	1.38356	1.42857	4.41406	109.802		37.6481	62.4605	109.802	1.51918	1.5686	4.84674
AAEL019435	Effector Molecules	AntiMic	LYS	LYSlong	high	LYSC6	CG8492		11.6436	22.3128	100	0.535044	1.19452	0.773973	30.3084		3.52898	6.76265	30.3084	0.162164	0.362041	0.234579
AAEL009745	Effector Molecules	EffEnzy	NO	NOS	high	-	Nos		100	3.89764	3.22401	7.8365	2.25738	38.2192	6.96398		6.96398	0.271431	0.22452	0.545732	0.157204	2.66158
AAEL013501	Effector Molecules	EffEnzy	PPO	PPO	high	PPO4	PPO1		100	92.2726	76.7059	0	3.34586	1.38638	6.33704		6.33704	5.84736	4.86089	0	0.212028	0.0878553
AAEL020579	Effector Molecules	EffEnzy	PPO	PPO	high	-	PPO1		100	82.4621	46.1924	0	3.52706	3.008	5.23428		5.23428	4.3163	2.41784	0	0.184616	0.157447
AAEL011763	Effector Molecules	EffEnzy	PPO	PPO	high	PPO3	PPO1		100	74.9848	51.7583	0.938188	1.04559	0	40.5569		40.5569	30.4115	20.9916	0.3805	0.424057	0
AAEL011764	Effector Molecules	EffEnzy	PPO	PPO	high	PPO10	PPO1		100	73.0359	69.0326	0	1.54885	2.35536	13.6894		13.6894	9.99815	9.45014	0	0.212028	0.322434
AAEL015116	Effector Molecules	EffEnzy	PPO	PPO	high	-	PPO1		100	72.8782	53.4308	0.487061	1.77783	6.52939	59.6313		59.6313	43.4582	31.8615	0.290441	1.06014	3.89356
AAEL013493	Effector Molecules	EffEnzy	PPO	PPO	high	PPO7	PPO1		100	69.4009	22.3021	0	0	14.5573	1.08157		1.08157	0.750621	0.241214	0	0	0.157447
AAEL013496	Effector Molecules	EffEnzy	PPO	PPO	high	PPO8	PPO1		100	24.5567	83.3814	1.11677	2.9241	26.0194	10.8766		10.8766	2.67094	9.06906	0.121466	0.318043	2.83003
AAEL013492	Effector Molecules	EffEnzy	PPO	PPO	high	PPO5	PPO1		98.5529	100	86.0503	3.32736	23.3329	12.4644	48.3966		47.6963	48.3966	41.6455	1.61033	11.2923	6.03237
AAEL015113	Effector Molecules	EffEnzy	PPO	PPO	high	-	PPO1		29.1723	39.5236	20.4658	0	8.67416	100	2.44437		0.71308	0.966103	0.50026	0	0.212028	2.44437
AAEL014544	Effector Molecules	EffEnzy	PPO	PPO	high	PPO6	PPO2		0	0	0	0	0	0	0.739986		0.169841	0.283319	0	0	0.102418	0.739986
AAEL007563	Effector Molecules	EffEnzy	PRDX	DUOX	high	DUOX	Duox		2.90767	2.44702	0.166463	0.271385	0.158739	100	131.306		3.81793	3.21308	0.218575	0.356344	0.208433	131.306
AAEL002039	Effector Molecules	EffEnzy	PRDX	NOX	high	-	Nox		0	0	0	0	0	0	0.894249		0.222451	0.271431	0	0.120771	0.389453	0.894249
AAEL027984	Modulation	CascMod	CLIP	atypicalCLIP	low	-	-		100	53.0577	32.7337	15.9642	0	48.8874	3.43335		3.43335	1.82166	1.12386	0.548107	0	1.67847
AAEL019781	Modulation	CascMod	CLIP	CLIP_other	high	-	-		100	76.063	36.4043	19.4318	2.91819	19.5926	17.9179		17.9179	13.6289	6.5229	3.48178	0.522879	3.51059
AAEL002632	Modulation	CascMod	CLIP	CLIP_other	high	-	-		91.5393	100	72.884	5.48458	0	16.7327	2.80385		2.56662	2.80385	2.04356	0.153779	0	0.469158
AAEL017003	Modulation	CascMod	CLIP	CLIP_other	high	-	grass		70.2674	100	57.9868	15.6331	40.2011	81.6668	4.49749		3.16027	4.49749	2.60795	0.703094	1.80804	3.67295
AAEL002595	Modulation	CascMod	CLIP	CLIP_other	high	-	CG5390		69.7437	100	88.8816	4.09853	3.76601	88.8011	248.012		172.973	248.012	220.437	10.1649	9.34018	220.238
AAEL019768	Modulation	CascMod	CLIP	CLIP_other	high	-	CG11313		54.0417	100	54.2048	2.04054	0	0	5.57412		3.01235	5.57412	3.02144	0.113742	0	0
AAEL015465	Modulation	CascMod	CLIP	CLIP_other	high	-	CG9737		36.7934	100	72.3887	1.20093	1.15454	4.09064	70.147		25.8095	70.147	50.7785	0.842419	0.809875	2.86946
AAEL018159	Modulation	CascMod	CLIP	CLIP_other	high	-	scaf		52.7399	100	16.5096	1.27402	0.0973114	0.278323	189.717		100.056	189.717	31.3216	2.41702	0.184616	0.528027
AAEL002600	Modulation	CascMod	CLIP	CLIP_other	high	-	CG5390		63.2921	89.0852	100	2.4573	1.2726	19.7396	283.298		179.306	252.377	283.298	6.96148	3.60525	55.9219
AAEL019767	Modulation	CascMod	CLIP	CLIP_other	high	-	Sp7		68.9984	85.6764	100	8.24264	0.87732	0.956606	232.55		160.456	199.241	232.55	19.1683	2.04021	2.22459
AAEL024669	Modulation	CascMod	CLIP	CLIP_other	high	-	-		26.7538	45.989	100	0.217954	0.480738	4.80071	288.627		77.2188	132.737	288.627	0.629076	1.38754	13.8561
AAEL002288	Modulation	CascMod	CLIP	CLIP_other	high	-	-		26.1326	38.8878	100	0.502201	3.92272	13.4488	40.6853		10.6321	15.8216	40.6853	0.204322	1.59597	5.47171
AAEL003279	Modulation	CascMod	CLIP	CLIP_other	high	-	grass		37.4605	27.7565	100	4.80273	51.7598	24.402	27.4191		10.2713	7.61058	27.4191	1.31686	14.192	6.69081
AAEL026937	Modulation	CascMod	CLIP	CLIP_other	high	-	-		33.191	15.3739	100	6.42987	6.51851	53.2154	1.20583		0.400226	0.185383	1.20583	0.0775331	0.0786019	0.641686
AAEL022578	Modulation	CascMod	CLIP	CLIP_other	high	-	CG9737		28.5363	44.1083	100	1.70402	1.86589	4.95306	401.698		114.63	177.182	401.698	6.84501	7.49522	19.8963
AAEL025028	Modulation	CascMod	CLIP	CLIP_other	high	-	grass		24.558	32.2082	45.2801	7.16215	15.0822	100	5.00648		1.22949	1.6125	2.26694	0.358571	0.755089	5.00648
AAEL019853	Modulation	CascMod	CLIP	CLIP_other	high	-	Hayan		43.6915	51.5074	77.1622	0.980699	1.66791	100	77.8307		34.0054	40.0886	60.0559	0.763285	1.29815	77.8307
AAEL002629	Modulation	CascMod	CLIP	CLIP_other	high	-	CG5390		54.4308	43.8264	42.5079	3.00935	1.12399	100	100.349		54.6207	43.9794	42.6563	3.01985	1.12792	100.349
AAEL002593	Modulation	CascMod	CLIP	CLIP_other	high	-	CG40160		54.012	98.8014	53.2635	3.45154	0.957449	100	130.989		70.7497	129.419	69.7692	4.52114	1.25415	130.989
AAEL002128	Modulation	CascMod	CLIP	CLIP_other	high	-	CG32260		0	0	0	0	0	0	0.271431		0.158879	0.271431	0	0	0	0.223856
AAEL002577	Modulation	CascMod	CLIP	CLIP_other	high	-	-		0	0	0	0	0	0	0.37812		0	0	0	0	0.0786019	0.37812
AAEL026876	Modulation	CascMod	CLIP	CLIP_other	high	-	Hayan		0	0	0	0	0	0	0.392639		0	0.392639	0	0	0.364594	0.357775
AAEL015637	Modulation	CascMod	CLIP	CLIP_other	high	-	Sp7		0	0	0	0	0	0	0.577		0.241347	0.0846482	0.154444	0.577	0.106014	0
AAEL008404	Modulation	CascMod	CLIP	CLIPA	high	CLIPA16	CG9377		100	56.4535	11.3033	5.51373	2.16427	3.15118	8.36404		8.36404	4.72179	0.945413	0.46117	0.18102	0.263566
AAEL005718	Modulation	CascMod	CLIP	CLIPA	high	CLIPA3	CG13318		100	1.22149	1.11432	0	4.28784	14.0422	13.8599		13.8599	0.169296	0.154444	0	0.59429	1.94622
AAEL002301	Modulation	CascMod	CLIP	CLIPA	high	-	-		51.7908	63.9305	100	0.200941	0.817133	0.421893	282.336		146.224	180.499	282.336	0.567331	2.30706	1.19116
AAEL007006	Modulation	CascMod	CLIP	CLIPA	high	CLIPA17	-		69.3413	63.5968	100	0.820625	49.0789	2.7251	34.4323		23.8758	21.8979	34.4323	0.28256	16.899	0.938316
AAEL020706	Modulation	CascMod	CLIP	CLIPA	high	-	CG9377		30.5802	50.6654	100	1.81208	34.3	22.3548	23.4396		7.16787	11.8758	23.4396	0.424743	8.03979	5.23988
AAEL002580	Modulation	CascMod	CLIP	CLIPA	high	-	CG9377		47.5015	49.5691	100	0.46189	4.09657	1.27933	191.136		90.7923	94.7444	191.136	0.882837	7.83001	2.44526
AAEL002624	Modulation	CascMod	CLIP	CLIPA	high	-	-		37.4919	48.8572	100	0.0528441	0.547244	0	80.5203		30.1886	39.34	80.5203	0.0425503	0.440642	0
AAEL022775	Modulation	CascMod	CLIP	CLIPA	high	-	CG9377		0	48.5712	100	0	0	19.1224	3.91531		0	1.90171	3.91531	0	0	0.748699
AAEL002601	Modulation	CascMod	CLIP	CLIPA	high	CLIPA1	CG9377		46.6341	45.798	100	1.5064	29.8407	8.69001	40.5413		18.9061	18.5671	40.5413	0.610715	12.0978	3.52304
AAEL002590	Modulation	CascMod	CLIP	CLIPA	high	-	-		21.2282	42.8764	13.9192	5.83516	0.489535	100	16.0564		3.4085	6.88443	2.23493	0.93692	0.0786019	16.0564
AAEL002126	Modulation	CascMod	CLIP	CLIPA	high	CLIPA15	mas		23.5591	0	6.4401	0	0	100	2.30586		0.543238	0	0.148499	0	0	2.30586
AAEL001675	Modulation	CascMod	CLIP	CLIPA	high	CLIPA10	CG4998		0	0	0	0	0	0	0.432631		0	0	0	0.0413241	0	0.432631
AAEL013245	Modulation	CascMod	CLIP	CLIPB	high	CLIPB28	-		100	95.445	48.1297	9.77059	0	0.779029	8.93316		8.93316	8.52625	4.2995	0.872823	0	0.0695918
AAEL001084	Modulation	CascMod	CLIP	CLIPB	high	CLIPB21	-		100	91.9775	54.8268	23.7254	16.9039	12.8885	4.12158		4.12158	3.79093	2.25973	0.977859	0.696708	0.53121
AAEL001077	Modulation	CascMod	CLIP	CLIPB	high	CLIPB45	-		100	79.7778	25.2375	81.3435	7.82229	0.684018	71.2586		71.2586	56.8485	17.9839	57.9642	5.57405	0.487422
AAEL014137	Modulation	CascMod	CLIP	CLIPB	high	CLIPB25	-		100	72.3919	27.9236	0.919678	0.23014	1.35158	34.154		34.154	24.7247	9.53702	0.314107	0.0786019	0.461618
AAEL007993	Modulation	CascMod	CLIP	CLIPB	high	CLIPB27	-		100	17.8266	16.1493	6.17677	23.5759	1.84556	1157.83		1157.83	206.401	186.981	71.5162	272.968	21.3684
AAEL000038	Modulation	CascMod	CLIP	CLIPB	high	CLIPB6	-		99.6502	96.4394	32.3804	41.0659	85.4017	100	61.4043		61.1895	59.2179	19.8829	25.2162	52.4403	61.4043
AAEL005648	Modulation	CascMod	CLIP	CLIPB	high	CLIPB16	CG17572		54.2798	100	7.34084	5.67977	16.4879	70.3719	2.2176		1.20371	2.2176	0.16279	0.125955	0.365636	1.56057
AAEL003632	Modulation	CascMod	CLIP	CLIPB	high	CLIPB39	CG9737		27.9836	100	14.882	2.77451	0.667522	15.9642	11.7752		3.29512	11.7752	1.75239	0.326704	0.0786019	1.87982
AAEL005060	Modulation	CascMod	CLIP	CLIPB	high	CLIPB44	CG34409		27.2541	100	6.16435	0	0	6.12174	1.1368		0.309824	1.1368	0.0700762	0	0	0.0695918
AAEL005431	Modulation	CascMod	CLIP	CLIPB	high	CLIPB37	-		46.6102	62.6219	100	0.158752	0.675373	2.15819	26.803		12.4929	16.7846	26.803	0.0425503	0.18102	0.57846
AAEL014354	Modulation	CascMod	CLIP	CLIPB	high	CLIPB43	-		54.4327	91.5386	100	6.37776	11.5793	24.7365	17.29		9.4114	15.827	17.29	1.10271	2.00205	4.27694
AAEL000037	Modulation	CascMod	CLIP	CLIPB	high	CLIPB35	-		50.3051	80.9988	100	0.54083	5.30223	1.22974	88.2335		44.386	71.4681	88.2335	0.477193	4.67835	1.08504
AAEL005093	Modulation	CascMod	CLIP	CLIPB	high	CLIPB46	-		68.1175	80.1441	100	4.58088	29.7866	0.634016	36.9989		25.2028	29.6525	36.9989	1.69488	11.0207	0.234579
AAEL000074	Modulation	CascMod	CLIP	CLIPB	high	CLIPB1	ea		38.1772	64.8137	100	1.53047	1.48092	27.0378	209.016		79.7966	135.471	209.016	3.19893	3.09536	56.5134
AAEL000028	Modulation	CascMod	CLIP	CLIPB	high	CLIPB34	-		88.0545	64.7674	100	2.6782	1.97185	15.8677	649.673		572.066	420.776	649.673	17.3995	12.8106	103.088
AAEL014349	Modulation	CascMod	CLIP	CLIPB	high	CLIPB15	-		27.7547	56.9629	100	3.87633	0.402382	0.626217	26.3466		7.31243	15.0078	26.3466	1.02128	0.106014	0.164987
AAEL003253	Modulation	CascMod	CLIP	CLIPB	high	CLIPB13B	grass		25.2387	48.321	100	0	0.6851	4.19151	14.9494		3.77303	7.2237	14.9494	0	0.102418	0.626605
AAEL015430	Modulation	CascMod	CLIP	CLIPB	high	CLIPB19	-		18.1088	45.8539	100	0.208879	1.08756	1.16241	76.6568		13.8816	35.1502	76.6568	0.16012	0.833691	0.891066
AAEL006674	Modulation	CascMod	CLIP	CLIPB	high	CLIPB29	-		33.5672	36.8112	100	0.0483371	0.619491	0.0546902	409.316		137.396	150.674	409.316	0.197852	2.53568	0.223856
AAEL006168	Modulation	CascMod	CLIP	CLIPB	high	CLIPB42	-		16.2031	34.0181	100	0	0.440499	8.69216	17.8438		2.89126	6.07014	17.8438	0	0.0786019	1.55102
AAEL000760	Modulation	CascMod	CLIP	CLIPB	high	CLIPB30	-		24.9106	24.5271	100	1.2459	0.644197	1.44877	28.1001		6.9999	6.89214	28.1001	0.350098	0.18102	0.407107
AAEL000099	Modulation	CascMod	CLIP	CLIPB	high	CLIPB33	-		34.6853	21.6523	100	0.109203	1.56648	1.63292	99.9029		34.6517	21.6312	99.9029	0.109097	1.56496	1.63133
AAEL007992	Modulation	CascMod	CLIP	CLIPB	high	-	-		21.4554	39.9539	35.1698	100	75.6658	47.1144	3.74001		0.802432	1.49428	1.31535	3.74001	2.8299	1.76208
AAEL008668	Modulation	CascMod	CLIP	CLIPB	high	CLIPB22	-		13.657	24.1777	40.1419	7.51031	100	0	15.8965		2.17097	3.8434	6.38114	1.19387	15.8965	0
AAEL006161	Modulation	CascMod	CLIP	CLIPB	high	CLIPB31	-		12.1362	34.3897	82.9765	2.27551	100	0.36354	24.1666		2.93291	8.31082	20.0526	0.549915	24.1666	0.0878553
AAEL005064	Modulation	CascMod	CLIP	CLIPB	high	CLIPB5	CG3505		54.979	63.2219	37.9178	7.99504	2.59488	100	220.451		121.202	139.373	83.5902	17.6252	5.72043	220.451
AAEL003243	Modulation	CascMod	CLIP	CLIPB	high	CLIPB13A	grass		22.4901	53.0812	46.1691	0.852045	1.35905	100	180.526		40.6005	95.8254	83.3472	1.53816	2.45344	180.526
AAEL003628	Modulation	CascMod	CLIP	CLIPB	high	CLIPB38	-		52.104	70.3868	65.5726	2.49942	0	100	6.33598		3.3013	4.4597	4.15467	0.158363	0	6.33598
AAEL014139	Modulation	CascMod	CLIP	CLIPB	high	-	-		49.5061	49.693	23.2208	0.814037	0	100	10.3035		5.10086	5.12012	2.39256	0.0838743	0	10.3035
AAEL003631	Modulation	CascMod	CLIP	CLIPB	high	CLIPB41	CG9737		0	0	0	0	0	0	0.407546		0.0715059	0.183983	0.407546	0	0	0.154264
AAEL012713	Modulation	CascMod	CLIP	CLIPC	high	CLIPC16	Hayan		100	77.6983	97.2031	6.78412	18.4471	43.1341	197.634		197.634	153.558	192.106	13.4077	36.4579	85.2478
AAEL007597	Modulation	CascMod	CLIP	CLIPC	high	CLIPC3	snk		46.9807	100	57.0064	5.51903	3.83269	52.1042	119.543		56.1622	119.543	68.1472	6.59763	4.58173	62.287
AAEL007593	Modulation	CascMod	CLIP	CLIPC	high	CLIPC2	snk		42.2703	100	16.6229	12.9032	53.7727	50.8339	128.063		54.1324	128.063	21.2878	16.5242	68.8628	65.0993
AAEL014350	Modulation	CascMod	CLIP	CLIPC	high	-	-		42.2002	100	61.7653	0.313084	0.779232	1.72	23.2306		9.80336	23.2306	14.3484	0.0727313	0.18102	0.399566
AAEL004524	Modulation	CascMod	CLIP	CLIPC	high	CLIPC5B	Hayan		69.2461	90.2396	100	1.91485	1.03546	17.997	60.3849		41.8141	54.4911	60.3849	1.15628	0.625259	10.8675
AAEL012712	Modulation	CascMod	CLIP	CLIPC	high	CLIPC13	Hayan		41.1495	72.2796	100	7.65331	18.3079	4.95432	60.1226		24.7401	43.4563	60.1226	4.60137	11.0072	2.97867
AAEL011991	Modulation	CascMod	CLIP	CLIPC	high	CLIPC1	snk		15.1032	58.4165	100	11.5649	3.31133	4.47527	26.9412		4.06897	15.7381	26.9412	3.11572	0.892112	1.20569
AAEL012711	Modulation	CascMod	CLIP	CLIPC	high	CLIPC12	-		33.0978	45.3399	100	0.639616	10.9658	41.4281	11.6214		3.84641	5.26912	11.6214	0.0743321	1.27437	4.81451
AAEL011593	Modulation	CascMod	CLIP	CLIPC	high	CLIPC11	snk		0	0	0	0	0	0	0.381366		0.090402	0.354679	0.381366	0	0	0.245302
AAEL019590	Modulation	CascMod	CLIP	CLIPD	high	-	-		100	96.8406	43.9499	1.90896	5.74635	2.6484	29.0796		29.0796	28.1609	12.7805	0.555118	1.67102	0.770146
AAEL004979	Modulation	CascMod	CLIP	CLIPD	high	CLIPD2	l(2)k05911		100	47.8577	47.2461	36.1056	11.9241	27.168	6.42295		6.42295	3.07388	3.03459	2.31904	0.765877	1.74499
AAEL002124	Modulation	CascMod	CLIP	CLIPD	high	CLIPD6	CG7432		63.03	100	25.6341	19.6744	1.1055	3.37603	197.278		124.344	197.278	50.5703	38.8132	2.18091	6.66015
AAEL007796	Modulation	CascMod	CLIP	CLIPD	high	CLIPD1	CG9372		83.967	66.2219	100	0.435583	0.751891	0.896625	28.1994		23.6782	18.6742	28.1994	0.122832	0.212028	0.252843
AAEL015109	Modulation	CascMod	CLIP	CLIPD	high	CLIPD10	CG8170		46.5436	16.4273	0	58.7107	17.2792	100	1.04762		0.487599	0.172096	0	0.615064	0.18102	1.04762
AAEL025309	Modulation	CascMod	CLIP	CLIPD	high	-	-		32.6588	1.36732	0	1.08625	11.8528	100	7.26497		2.37265	0.0993352	0	0.0789159	0.861103	7.26497
AAEL011375	Modulation	CascMod	CLIP	CLIPD	high	-	-		0	0	0	0	0	0	0.256744		0.233414	0.256744	0	0.0727313	0	0.216316
AAEL002997	Modulation	CascMod	CLIP	CLIPD	high	CLIPD3	CG7432		0	0	0	0	0	0	0.146724		0	0	0.0784231	0	0.102418	0.146724
AAEL000224	Modulation	CascMod	CLIP	CLIPD	high	-	CG13744		0	0	0	0	0	0	0.0794395		0.0794395	0	0	0	0	0
AAEL005906	Modulation	CascMod	CLIP	CLIPD	high	-	Sb		0	0	0	0	0	0	0.090402		0.090402	0	0	0	0	0.0878553
AAEL000238	Modulation	CascMod	CLIP	CLIPD	high	CLIPD9	CG8172		0	0	0	0	0	0	0.549473		0.169841	0.170696	0	0.036209	0	0.549473
AAEL005792	Modulation	CascMod	CLIP	CLIPE	high	CLIPE8	-		82.843	76.9413	47.7626	100	24.3013	15.5549	5.93533		4.91701	4.56672	2.83487	5.93533	1.44236	0.923236
AAEL018347	Modulation	CascMod	CLIP	CLIPE	high	CLIPE12	-		35.7194	99.0532	33.6373	13.8788	18.7356	100	6.03683		2.15632	5.97967	2.03063	0.837842	1.13104	6.03683
AAEL001233	Modulation	CascMod	CLIP	CLIPE	high	CLIPE9	-		82.8145	33.9924	7.56283	15.6675	2.91479	100	8.08996		6.69966	2.74997	0.61183	1.26749	0.235806	8.08996
AAEL004995	Modulation	CascMod	DREP	DREP	high	-	Drep4		100	13.129	8.65386	8.88937	15.5929	91.7091	26.9777		26.9777	3.5419	2.33461	2.39815	4.20662	24.741
AAEL006265	Modulation	CascMod	DREP	DREP	high	-	Drep2		100	8.0241	0.965136	0.418116	0	40.4872	56.3813		56.3813	4.52409	0.544156	0.235739	0	22.8272
AAEL014825	Modulation	CascMod	DREP	DREP	high	-	Drep1		8.45834	1.13976	0.541198	0.500806	0.548902	100	55.9763		4.73467	0.637998	0.302943	0.280333	0.307255	55.9763
AAEL023229	Modulation	CascMod	initiator SP	ModSP	high	-	modSP		37.5971	60.1547	67.0941	3.7597	1.63651	100	22.1227		8.31748	13.3078	14.843	0.831746	0.362041	22.1227
AAEL014138	Modulation	CascMod	SRPN	SRPN	high	SRPN16	Spn28Dc		55.544	100	34.9076	9.87924	7.95778	0.633662	34.1374		18.9613	34.1374	11.9165	3.37252	2.71658	0.216316
AAEL007420	Modulation	CascMod	SRPN	SRPN	high	SRPN25	-		47.7123	100	18.9731	15.5689	39.9321	8.22001	19.4436		9.27699	19.4436	3.68905	3.02715	7.76424	1.59827
AAEL017249	Modulation	CascMod	SRPN	SRPN	high	SRPN24	Spn42Da		28.1848	100	28.876	0	0	0	7.29079		2.05489	7.29079	2.10529	0	0	0
AAEL003182	Modulation	CascMod	SRPN	SRPN	high	SRPN26	-		9.66569	100	0	0.344762	0	1.90045	48.7621		4.71319	48.7621	0	0.168113	0	0.926698
AAEL002704	Modulation	CascMod	SRPN	SRPN	high	SRPN23	-		14.9568	100	1.43553	1.06637	0.86373	0.122204	56.9473		8.51751	56.9473	0.817494	0.607271	0.491871	0.0695918
AAEL002730	Modulation	CascMod	SRPN	SRPN	high	SRPN21	-		39.9394	55.1134	100	0.298602	0.387531	0	26.4285		10.5554	14.5656	26.4285	0.0789159	0.102418	0
AAEL028034	Modulation	CascMod	SRPN	SRPN	high	-	Spn77Ba		63.6491	98.1492	100	13.8561	36.0259	97.6193	31.3791		19.9725	30.7983	31.3791	4.34791	11.3046	30.6321
AAEL011777	Modulation	CascMod	SRPN	SRPN	high	SRPN8	Spn77Ba		63.6491	98.1492	100	13.8561	36.0259	97.6193	31.3791		19.9725	30.7983	31.3791	4.34791	11.3046	30.6321
AAEL002731	Modulation	CascMod	SRPN	SRPN	high	SRPN14	-		44.4578	75.133	100	0.839656	5.41518	1.78476	8.64338		3.84266	6.49404	8.64338	0.0725747	0.468055	0.154264
AAEL002720	Modulation	CascMod	SRPN	SRPN	high	SRPN20	-		42.4402	70.2365	100	2.52701	2.61073	0.23712	165.328		70.1655	116.121	165.328	4.17786	4.31627	0.392026
AAEL020823	Modulation	CascMod	SRPN	SRPN	high	-	-		51.354	67.2822	100	3.05603	13.4891	69.507	289.25		148.541	194.614	289.25	8.83958	39.0172	201.049
AAEL014078	Modulation	CascMod	SRPN	SRPN	high	-	Spn27A		62.3242	65.708	100	3.39673	15.9405	33.0011	282.597		176.126	185.689	282.597	9.59907	45.0475	93.2601
AAEL013936	Modulation	CascMod	SRPN	SRPN	high	SRPN4	Spn28Dc		50.4882	54.5825	100	3.33056	29.9456	46.1559	207.854		104.942	113.452	207.854	6.92268	62.2431	95.9367
AAEL003697	Modulation	CascMod	SRPN	SRPN	high	SRPN17	-		75.8069	74.5224	100	4.59524	2.56546	2.36182	96.0555		72.8167	71.5829	96.0555	4.41398	2.46427	2.26866
AAEL007765	Modulation	CascMod	SRPN	SRPN	high	SRPN10	Spn55B		36.2586	57.6627	22.6978	64.0743	100	82.5819	146.51		53.1225	84.4818	33.2546	93.8753	146.51	120.991
AAEL010769	Modulation	CascMod	SRPN	SRPN	high	SRPN6	Spn28Dc		32.9879	81.2152	4.95728	6.11273	100	8.57669	43.2136		14.2552	35.096	2.14222	2.64153	43.2136	3.70629
AAEL014079	Modulation	CascMod	SRPN	SRPN	high	-	Spn27A		74.5182	67.6234	52.7428	1.6837	5.89906	100	16.7372		12.4723	11.3183	8.82767	0.281804	0.987338	16.7372
AAEL008364	Modulation	CascMod	SRPN	SRPN	high	SRPN9	Spn88Ea		40.1209	61.5399	32.4393	5.70051	3.13431	100	165.942		66.5774	102.121	53.8305	9.45955	5.20115	165.942
AAEL014141	Modulation	CascMod	SRPN	SRPN	high	SRPN5	Spn28Dc		8.95645	11.9531	21.6123	0.698245	0.638829	100	40.6403		3.63993	4.85778	8.7833	0.283769	0.259622	40.6403
AAEL005665	Modulation	CascMod	SRPN	SRPN	high	SRPN3	-		34.1808	40.6662	78.6886	3.13502	0.335304	100	23.442		8.01267	9.53296	18.4462	0.734911	0.0786019	23.442
AAEL027145	Modulation	CascMod	SRPN	SRPN	high	-	CG43366		5.69093	12.7752	21.2331	6.88155	0	100	4.1015		0.233414	0.523976	0.870876	0.282247	0	4.1015
AAEL024006	Modulation	CascMod	SRPN	SRPN	high	-	-		0	0	0	0	0	0	0.311711		0	0	0	0	0	0.311711
AAEL003653	Modulation	CascMod	SRPN	SRPN	high	SRPN12	Spn100A		0	0	0	0	0	0	0.747526		0.30492	0.0846482	0.0843674	0	0	0.747526
AAEL006137	Modulation	CascMod	SRPN	SRPN	high	SRPN19	Spn85F		0	0	0	0	0	0	0.331749		0.331749	0	0	0.116882	0.257148	0.0773635
AAEL002699	Modulation	CascMod	SRPN	SRPN	high	SRPN7	-		0	0	0	0	0	0	0.0715059		0.0715059	0	0	0.0425503	0	0
AAEL003844	Recognition	ClasRec	GALE	GALE	high	GALE5	-		24.1393	59.666	100	50.936	51.4368	43.5173	200.716		48.4514	119.759	200.716	102.237	103.242	87.3461
AAEL012135	Recognition	ClasRec	GALE	GALE	high	GALE2	CG5335		0.626796	2.98239	0.297732	100	75.3278	3.24397	54.6768		0.342712	1.63068	0.16279	54.6768	41.1868	1.7737
AAEL009842	Recognition	ClasRec	GALE	GALE	high	GALE12	-		16.7664	15.2184	14.0897	100	25.9364	18.1821	67.5369		11.3235	10.278	9.51577	67.5369	17.5166	12.2796
AAEL005293	Recognition	ClasRec	GALE	GALE	high	GALE8A	-		3.4163	1.48884	1.20398	100	13.8673	0.489616	292.495		9.99253	4.3548	3.52158	292.495	40.5612	1.4321
AAEL009850	Recognition	ClasRec	GALE	GALE	high	GALE14	-		25.3892	54.9415	6.43083	97.2494	100	21.5643	8.10965		2.05897	4.45556	0.521518	7.88659	8.10965	1.74879
AAEL003541	Recognition	ClasRec	GALE	GALE	high	GALE1	galectin		15.5954	13.3315	7.86286	29.2222	100	26.494	82.5421		12.8728	11.0041	6.49017	24.1206	82.5421	21.8687
AAEL026564	Recognition	ClasRec	GALE	GALE	high	-	galectin		14.9544	0	42.2657	47.1371	88.788	100	11.7728		1.76055	0	4.97584	5.54933	10.4528	11.7728
AAEL004196	Recognition	ClasRec	GALE	GALE	high	GALE3	Pex23		50.3888	15.4998	11.4016	10.8798	27.0427	100	37.8581		19.0762	5.86793	4.31644	4.11888	10.2379	37.8581
AAEL012003	Recognition	ClasRec	GALE	GALE	high	GALE6B	-		36.7613	59.8553	27.0878	16.8788	14.0214	100	2.82886		1.03992	1.69322	0.766274	0.477477	0.396645	2.82886
AAEL003840	Recognition	ClasRec	GALE	GALE	high	GALE11	-		0	0	0	0	0	0	0.157447		0	0.0846482	0	0	0	0.157447
AAEL000652	Recognition	ClasRec	GNBP	GNBPA	high	GNBPA2	GNBP1		7.24343	100	41.9329	0	0	17.1935	3.07108		0.222451	3.07108	1.28779	0	0	0.528027
AAEL007626	Recognition	ClasRec	GNBP	GNBPA	high	GNBPA1	GNBP1		56.1357	76.8694	100	2.37116	1.82053	16.1943	23.2931		13.0757	17.9053	23.2931	0.552316	0.424057	3.77215
AAEL009178	Recognition	ClasRec	GNBP	GNBPB	high	GNBPB4	-		66.6973	100	4.22618	0	82.9115	4.05049	15.5485		10.3704	15.5485	0.657106	0	12.8915	0.629789
AAEL007064	Recognition	ClasRec	GNBP	GNBPB	high	GNBPB6	-		35.08	100	0.12047	0	0	0.0550692	140.064		49.1344	140.064	0.168735	0	0	0.077132
AAEL003894	Recognition	ClasRec	GNBP	GNBPB	high	GNBPB5	-		0.37279	100	0	0	0.447066	0	40.4907		0.150945	40.4907	0	0	0.18102	0
AAEL003889	Recognition	ClasRec	GNBP	GNBPB	high	GNBPB1	-		87.4378	88.2241	100	7.59982	14.3124	6.31722	59.8721		52.3509	52.8217	59.8721	4.55017	8.56912	3.78225
AAEL010270	Recognition	ClasRec	GNBP	GNBPB	high	-	-		2.957	2.16759	1.26568	0.296173	3.75206	100	67.6779		2.00124	1.46698	0.856585	0.200443	2.53931	67.6779
AAEL022879	Recognition	ClasRec	GNBP	GNBPB	high	-	-		0	0	0	0	0	0	0		0	0	0	0	0	0
AAEL009176	Recognition	ClasRec	GNBP	GNBPB	high	GNBPB3	-		0	0	0	0	0	0	0		0	0	0	0	0	0
AAEL012007	Recognition	ClasRec	PGRP	atypicalPGRP	high	-	-		1.37833	1.61537	3.39621	100	89.8684	16.3992	48.4175		0.667354	0.782119	1.64436	48.4175	43.512	7.94006
AAEL027982	Recognition	ClasRec	PGRP	PGRPL	high	PGRP-LE	PGRP-LE		5.81053	3.30864	1.84978	100	5.02857	1.58211	37.4454		2.17577	1.23893	0.692656	37.4454	1.88297	0.592426
AAEL010171	Recognition	ClasRec	PGRP	PGRPL	high	PGRPLB	PGRP-LB		1.36125	5.54852	1.65133	100	3.38055	1.41293	160.236		2.18121	8.89071	2.64602	160.236	5.41685	2.26402
AAEL014640	Recognition	ClasRec	PGRP	PGRPL	high	PGRPLC	PGRP-LF		14.0357	18.9276	25.2724	29.1336	100	4.0115	403.966		56.6996	76.4612	102.092	117.69	403.966	16.2051
AAEL021026	Recognition	ClasRec	PGRP	PGRPL	high	-	PGRP-LA		94.8799	31.7756	30.2615	26.4713	100	2.62379	15.516		14.7215	4.9303	4.69537	4.10728	15.516	0.407107
AAEL012380	Recognition	ClasRec	PGRP	PGRPL	high	PGRPLA	PGRP-LA		67.3105	69.042	17.155	24.8205	100	19.872	3.44945		2.32184	2.38157	0.591755	0.856171	3.44945	0.685474
AAEL019745	Recognition	ClasRec	PGRP	PGRPL	high	-	PGRP-LD		10.1459	6.97081	11.3787	1.95418	100	34.5013	354.489		35.9661	24.7107	40.3364	6.92735	354.489	122.303
AAEL009474	Recognition	ClasRec	PGRP	PGRPS	high	PGRPS1	PGRP-SA		29.4489	36.7064	100	35.1968	85.4917	5.98012	76.6485		22.5722	28.1349	76.6485	26.9778	65.5281	4.58367
AAEL017056	Recognition	ClasRec	PGRP	PGRPS	high	PGRPS4	PGRP-SC1a		0	0	0	100	4.52013	0	5.21679		0	0	0	5.21679	0.235806	0
AAEL011551	Recognition	ClasRec	PGRP	PGRPS	high	-	CG9380		0	0.120098	0	100	96.387	0.287255	281.929		0	0.338593	0	281.929	271.743	0.809856
AAEL007039	Recognition	ClasRec	PGRP	PGRPS	high	PGRP-SC1	PGRP-SC1a		0	0	0	100	0	0	2.52636		0	0	0	2.52636	0	0
AAEL019858	Recognition	ClasRec	SCR	SCR_other	high	-	CG42339		100	7.69539	0.489374	0.140223	0.867426	0.942199	30.3447		30.3447	2.33514	0.148499	0.0425503	0.263218	0.285908
AAEL027694	Recognition	ClasRec	SCR	SCRA	high	-	-		100	83.5525	23.1834	24.5039	3.39142	70.0126	12.3966		12.3966	10.3577	2.87396	3.03766	0.420422	8.67921
AAEL022263	Recognition	ClasRec	SCR	SCRA	high	-	Loxl2		9.78856	100	1.21169	0.188409	0	1.92826	19.2183		1.8812	19.2183	0.232867	0.036209	0	0.37058
AAEL001914	Recognition	ClasRec	SCR	SCRA	high	-	bark		67.3628	45.848	13.1496	52.8655	100	65.0055	31.4521		21.187	14.4202	4.13581	16.6273	31.4521	20.4456
AAEL009192	Recognition	ClasRec	SCR	SCRA	high	SCRASP1	teq		81.9204	40.7899	75.5044	0.435236	100	33.8782	37.0385		30.3421	15.1079	27.9657	0.161205	37.0385	12.548
AAEL023587	Recognition	ClasRec	SCR	SCRA	high	-	teq		70.0536	22.6874	36.4113	0.210561	100	39.1506	129.325		90.5969	29.3406	47.0889	0.272308	129.325	50.6316
AAEL010655	Recognition	ClasRec	SCR	SCRA	high	SCRASP2	Corin		53.2328	11.0143	0	0	3.20611	100	2.45163		1.30507	0.270031	0	0	0.0786019	2.45163
AAEL011222	Recognition	ClasRec	SCR	SCRB	high	SCRB5	CG40006		100	97.8174	46.7493	8.62044	1.31656	13.0482	68.0338		68.0338	66.5489	31.8053	5.86481	0.895708	8.8772
AAEL009423	Recognition	ClasRec	SCR	SCRB	high	SCRBQ2	crq		100	56.2313	67.3136	34.3556	83.9921	80.9408	37.2567		37.2567	20.9499	25.0788	12.7998	31.2927	30.1559
AAEL002741	Recognition	ClasRec	SCR	SCRB	high	SCRB6	CG10345		100	31.9312	1.53496	16.7958	19.3243	5.44845	5.10912		5.10912	1.6314	0.0784231	0.858119	0.987299	0.278367
AAEL027927	Recognition	ClasRec	SCR	SCRB	high	-	pes		100	31.5834	56.1966	28.7037	0.794491	39.6416	38.6732		38.6732	12.2143	21.733	11.1007	0.307255	15.3307
AAEL005374	Recognition	ClasRec	SCR	SCRB	high	SCRB1	Snmp1		100	0	0.168381	0	0	3.25581	50.1052		50.1052	0	0.0843674	0	0	1.63133
AAEL005979	Recognition	ClasRec	SCR	SCRB	high	SCRB3	dsb		64.0661	100	74.2902	29.8743	0	14.0772	1.66637		1.06758	1.66637	1.23795	0.497818	0	0.234579
AAEL019436	Recognition	ClasRec	SCR	SCRB	high	-	Snmp2		61.3016	100	14.8608	11.2413	1.05062	1.00382	41.941		25.7105	41.941	6.23275	4.7147	0.440642	0.421013
AAEL000256	Recognition	ClasRec	SCR	SCRB	high	SCRB9	emp		73.3324	100	40.137	24.3562	13.3858	37.2816	21.6746		15.8945	21.6746	8.69953	5.27911	2.90131	8.08064
AAEL000227	Recognition	ClasRec	SCR	SCRB	high	SCRB8	CG3829		34.7446	42.2398	100	24.2655	4.82711	5.40186	61.5847		21.3973	26.0133	61.5847	14.9438	2.97276	3.32672
AAEL000234	Recognition	ClasRec	SCR	SCRB	high	SCRB7	CG2736		78.8774	52.308	81.1168	100	95.1559	43.2334	18.6902		14.7423	9.77646	15.1609	18.6902	17.7848	8.08039
AAEL009432	Recognition	ClasRec	SCR	SCRB	high	SCRBQ3	crq		1.30682	2.01715	1.63168	100	2.04873	1.28355	93.7074		1.22458	1.89022	1.52901	93.7074	1.91981	1.20278
AAEL009420	Recognition	ClasRec	SCR	SCRB	high	SCRBQ1	crq		0.223691	0	0	100	1.92723	21.0682	40.4138		0.090402	0	0	40.4138	0.778867	8.51444
AAEL008370	Recognition	ClasRec	SCR	SCRB	high	SCRB17	pes		55.361	19.9327	25.1903	22.1271	2.11805	100	54.9923		30.4443	10.9615	13.8527	12.1682	1.16476	54.9923
AAEL006355	Recognition	ClasRec	SCR	SCRC	high	SCRC1	Sr-CI		59.2394	100	50.676	0	0	11.3374	9.28674		5.50141	9.28674	4.70615	0	0	1.05287
AAEL006361	Recognition	ClasRec	SCR	SCRC	high	SCRC2	Sr-CI		65.7295	100	52.8997	0	1.74307	0	6.08202		3.99769	6.08202	3.21738	0	0.106014	0
AAEL019726	Recognition	OtheRec	CTL	atypicalLECTIN	low	-	Mp		100	14.5557	7.36849	1.26666	0.652296	12.5114	115.207		115.207	16.7692	8.48906	1.45928	0.751493	14.4141
AAEL011622	Recognition	OtheRec	CTL	atypicalLECTIN	low	-	-		62.5002	34.807	74.2211	2.54044	100	7.70198	65.9887		41.2431	22.9687	48.9775	1.6764	65.9887	5.08244
AAEL025598	Recognition	OtheRec	CTL	atypicalLECTIN	low	-	-		0	0	0	0	0	0	0		0	0	0	0	0	0
AAEL006825	Recognition	OtheRec	CTL	CTL	high	-	CG15765		100	14.5855	1.42771	0	0.796991	4.2485	42.4376		42.4376	6.18974	0.605886	0	0.338224	1.80296
AAEL029068	Recognition	OtheRec	CTL	CTL	high	-	-		100	10.6331	0	1.71778	0	2.96167	4.95409		4.95409	0.526775	0	0.0851005	0	0.146724
AAEL008299	Recognition	OtheRec	CTL	CTL	high	CTL11	-		55.8056	100	0.933388	0	2.82414	1.1702	7.50772		4.18973	7.50772	0.0700762	0	0.212028	0.0878553
AAEL009338	Recognition	OtheRec	CTL	CTL	high	CTL10	CG13587		53.5844	100	9.3734	7.35391	10.6685	9.74289	240.404		128.819	240.404	22.5341	17.6791	25.6475	23.4223
AAEL019633	Recognition	OtheRec	CTL	CTL	high	-	-		58.751	35.5943	100	1.71974	66.2083	26.3507	10.6661		6.26644	3.79652	10.6661	0.183429	7.06185	2.81059
AAEL026955	Recognition	OtheRec	CTL	CTL	high	-	-		6.21528	12.4841	100	0.0215565	0.283211	0.00696151	4323.6		268.724	539.763	4323.6	0.932018	12.2449	0.300988
AAEL014382	Recognition	OtheRec	CTL	CTL	high	CTLMA14	-		70.8426	72.5748	90.3651	14.6743	100	6.49707	49.3604		34.9682	35.8232	44.6046	7.2433	49.3604	3.20698
AAEL005482	Recognition	OtheRec	CTL	CTL	high	CTL18	-		10.1592	12.9436	77.6335	3.75961	100	0.0643039	108.223		10.9947	14.008	84.0175	4.06877	108.223	0.0695918
AAEL018265	Recognition	OtheRec	CTL	CTL	high	CTL9	CG14866		59.4194	89.1397	49.1752	74.5035	55.2668	100	3.62888		2.15626	3.23478	1.78451	2.70365	2.00557	3.62888
AAEL022136	Recognition	OtheRec	CTL	CTL	high	-	rgn		37.8149	13.0328	20.7702	30.4018	54.9683	100	169.078		63.9366	22.0356	35.1178	51.4027	92.9391	169.078
AAEL018207	Recognition	OtheRec	CTL	CTL	high	CTL8	nw		32.3468	28.9196	12.3137	48.4577	8.45243	100	2.50849		0.811415	0.725445	0.308887	1.21556	0.212028	2.50849
AAEL014384	Recognition	OtheRec	CTL	CTL	high	-	-		0	0	0	0	0	0	0		0	0	0	0	0	0
AAEL011078	Recognition	OtheRec	CTL	CTLGA	high	CTLGA1	CG6055		100	57.7401	13.405	0.284347	0	3.21321	53.7018		53.7018	31.0075	7.19875	0.152699	0	1.72555
AAEL011070	Recognition	OtheRec	CTL	CTLGA	high	CTLGA3	Clect27		100	57.3422	31.284	15.5694	1.26106	8.67409	83.494		83.494	47.8773	26.1203	12.9995	1.05291	7.24235
AAEL013853	Recognition	OtheRec	CTL	CTLGA	high	CTLGA2	CG4115		100	29.1141	46.5421	27.2214	28.3367	18.7308	8.59485		8.59485	2.50232	4.00023	2.33964	2.4355	1.60988
AAEL008681	Recognition	OtheRec	CTL	CTLGA	high	CTL12	-		68.5253	62.1719	38.3607	38.9529	100	39.3747	21.3959		14.6616	13.3022	8.20761	8.33433	21.3959	8.42458
AAEL011612	Recognition	OtheRec	CTL	CTLMA	high	CTLMA6	tfc		100	69.8081	33.0708	0.650947	1.31718	47.2228	11.9349		11.9349	8.33151	3.94696	0.0776897	0.157204	5.63599
AAEL025802	Recognition	OtheRec	CTL	CTLMA	high	-	-		100	69.4026	75.9309	0	0	5.98291	1.28921		1.28921	0.894742	0.978905	0	0	0.077132
AAEL002524	Recognition	OtheRec	CTL	CTLMA	high	CTL24	lectin-37Da		100	37.7242	30.547	6.31398	24.3165	0.545552	26.8946		26.8946	10.1458	8.21549	1.69812	6.53982	0.146724
AAEL011621	Recognition	OtheRec	CTL	CTLMA	high	CTLMA13	-		100	33.7898	52.0128	2.86518	23.9974	65.8877	5.34043		5.34043	1.80452	2.77771	0.153013	1.28156	3.51869
AAEL012353	Recognition	OtheRec	CTL	CTLMA	high	CTL15	lectin-37Da		68.8775	100	81.7467	0.657237	25.8769	5.65624	12.5751		8.66141	12.5751	10.2797	0.0826481	3.25404	0.711277
AAEL027215	Recognition	OtheRec	CTL	CTLMA	high	-	lectin-37Da		58.9711	100	5.83994	3.46144	0	0	1.22927		0.724911	1.22927	0.0717884	0.0425503	0	0
AAEL000556	Recognition	OtheRec	CTL	CTLMA	high	CTL25	lectin-37Da		14.6525	100	0	0	0.0516061	0	198.462		29.0796	198.462	0	0	0.102418	0
AAEL000533	Recognition	OtheRec	CTL	CTLMA	high	CTL16	lectin-37Da		9.81722	100	0	0	0.0371375	0	285.464		28.0246	285.464	0	0	0.106014	0
AAEL000543	Recognition	OtheRec	CTL	CTLMA	high	CTLMA11	lectin-37Da		95.7882	93.0948	100	3.23509	22.7247	28.0885	23.0621		22.0908	21.4696	23.0621	0.74608	5.24078	6.47779
AAEL011453	Recognition	OtheRec	CTL	CTLMA	high	CTL14	lectin-37Da		18.7707	80.9098	100	10.4305	8.88625	0.452279	15.3869		2.88824	12.4495	15.3869	1.60493	1.36732	0.0695918
AAEL023353	Recognition	OtheRec	CTL	CTLMA	high	-	lectin-37Da		59.6356	70.5758	100	0.324516	0.867211	1.25002	36.6742		21.8709	25.8831	36.6742	0.119014	0.318043	0.458435
AAEL011408	Recognition	OtheRec	CTL	CTLMA	high	CTL21	lectin-37Da		84.548	69.9726	100	0.744015	58.2758	0.181678	38.3051		32.3862	26.803	38.3051	0.284995	22.3226	0.0695918
AAEL000283	Recognition	OtheRec	CTL	CTLMA	high	CTLMA16	lectin-37Da		39.4579	45.1455	100	0	0	6.87807	2.39874		0.946493	1.08292	2.39874	0	0	0.164987
AAEL011455	Recognition	OtheRec	CTL	CTLMA	high	CTLMA12	lectin-37Da		34.0228	44.0979	100	0.118123	0.127657	0.803867	61.5726		20.9487	27.1522	61.5726	0.0727313	0.0786019	0.494962
AAEL029020	Recognition	OtheRec	CTL	CTLMA	high	-	lectin-33A		21.6928	36.1782	100	0.0785604	0.571087	79.2898	46.0907		9.99836	16.6748	46.0907	0.036209	0.263218	36.5452
AAEL029039	Recognition	OtheRec	CTL	CTLMA	high	-	lectin-33A		74.1881	33.8726	100	0.65996	14.0823	1.33526	11.5531		8.57105	3.91335	11.5531	0.0762461	1.62694	0.154264
AAEL000563	Recognition	OtheRec	CTL	CTLMA	high	mosGCTL-1	lectin-37Da		18.7041	13.2449	100	0	0	0	2.03875		0.38133	0.270031	2.03875	0	0	0
AAEL005641	Recognition	OtheRec	CTL	CTLMA	high	CTLGA5	lectin-37Da		30.6352	57.4481	50.419	100	7.38797	0	13.0904		4.01028	7.5202	6.60006	13.0904	0.967118	0
AAEL011407	Recognition	OtheRec	CTL	CTLMA	high	CTL20	lectin-37Da		2.2322	2.54497	3.23232	4.05776	3.08232	100	6.76219		0.150945	0.172096	0.218575	0.274393	0.208433	6.76219
AAEL022823	Recognition	OtheRec	CTL	CTLMA	high	-	lectin-37Da		0	0	0	0	0	0	0.0878553		0	0	0	0	0	0.0878553
AAEL029053	Recognition	OtheRec	CTL	CTLMA	high	-	lectin-33A		0	0	0	0	0	0	0		0	0	0	0	0	0
AAEL027443	Recognition	OtheRec	CTL	CTLMA	high	-	lectin-37Da		0	0	0	0	0	0	0.395657		0	0	0.395657	0	0	0.154264
AAEL029058	Recognition	OtheRec	CTL	CTLMA	high	-	lectin-33A		0	0	0	0	0	0	0.259622		0	0	0	0.157971	0.259622	0
AAEL011404	Recognition	OtheRec	CTL	CTLMA	high	CTL19	lectin-37Da		0	0	0	0	0	0	0.806673		0.551172	0.370766	0.241214	0.0794471	0.208433	0.806673
AAEL009209	Recognition	OtheRec	CTL	CTLMA	high	CTLGA6	lectin-37Da		0	0	0	0	0	0	0.090402		0.090402	0.0860478	0	0	0	0
AAEL011079	Recognition	OtheRec	CTL	CTLMA	high	CTLMA10	lectin-37Da		0	0	0	0	0	0	0.0846482		0	0.0846482	0	0	0	0
AAEL021200	Recognition	OtheRec	CTL	CTLSE	high	-	fw		93.288	100	15.6289	15.3924	1.70471	2.44216	6.00795		5.6047	6.00795	0.93898	0.924767	0.102418	0.146724
AAEL014357	Recognition	OtheRec	CTL	CTLSE	high	-	CG9095		4.23275	4.69132	1.55004	3.0134	12.0573	100	5.44291		0.230385	0.255344	0.0843674	0.164016	0.656267	5.44291
AAEL009723	Recognition	OtheRec	FREP	FREP	high	-	CG41520		100	40.1853	4.09846	1.1132	0	43.258	11.7123		11.7123	4.70663	0.480024	0.130382	0	5.06652
AAEL019868	Recognition	OtheRec	FREP	FREP	high	-	CG30280		100	95.3174	82.7326	6.09401	4.37818	0.2467	35.6122		35.6122	33.9446	29.4629	2.17021	1.55917	0.0878553
AAEL011634	Recognition	OtheRec	FREP	FREP	high	-	CG30280		100	58.7033	91.8475	0	0	79.8561	1.01414		1.01414	0.595337	0.931467	0	0	0.809856
AAEL014773	Recognition	OtheRec	FREP	FREP	high	-	sca		100	4.04046	0	0	0	3.26776	2.12965		2.12965	0.0860478	0	0	0	0.0695918
AAEL013506	Recognition	OtheRec	FREP	FREP	high	-	CG30280		100	0	2.75709	1.42462	0	9.22934	2.54167		2.54167	0	0.0700762	0.036209	0	0.234579
AAEL002713	Recognition	OtheRec	FREP	FREP	high	-	CG30280		100	0	0	0	0	0	1.29411		1.29411	0	0	0	0	0
AAEL021180	Recognition	OtheRec	FREP	FREP	high	-	CG30280		94.5876	100	81.5068	6.44304	17.5888	92.0891	4.48975		4.24674	4.48975	3.65945	0.289276	0.789693	4.13457
AAEL000508	Recognition	OtheRec	FREP	FREP	high	-	CG9593		46.2031	100	10.2332	48.9414	21.109	65.3803	1.59081		0.735005	1.59081	0.16279	0.778566	0.335805	1.04008
AAEL000749	Recognition	OtheRec	FREP	FREP	high	-	-		24.7507	100	0.18719	0	0	0	37.4358		9.26563	37.4358	0.0700762	0	0	0
AAEL000726	Recognition	OtheRec	FREP	FREP	high	-	-		16.0098	100	0	0.0751906	0	0	50.7019		8.11728	50.7019	0	0.038123	0	0
AAEL011633	Recognition	OtheRec	FREP	FREP	high	-	CG30280		80.4313	100	39.5053	12.9363	22.2156	74.6008	3.06128		2.46223	3.06128	1.20937	0.396016	0.680083	2.28374
AAEL003294	Recognition	OtheRec	FREP	FREP	high	-	CG30280		88.0022	68.6923	100	1.44045	3.11344	21.9373	2.5246		2.22171	1.73421	2.5246	0.0363656	0.0786019	0.55383
AAEL010117	Recognition	OtheRec	FREP	FREP	high	-	CG30280		73.5571	46.4689	100	2.48756	0	0	1.53255		1.1273	0.712158	1.53255	0.038123	0	0
AAEL009384	Recognition	OtheRec	FREP	FREP	high	-	CG30280		94.4633	43.0603	100	33.8145	98.233	29.3826	1.06087		1.00213	0.456814	1.06087	0.358728	1.04212	0.311711
AAEL025744	Recognition	OtheRec	FREP	FREP	high	-	CG30280		15.6693	19.0729	100	0.451643	1.1641	5.62422	35.5011		5.56278	6.77108	35.5011	0.160338	0.413269	1.99666
AAEL006704	Recognition	OtheRec	FREP	FREP	high	-	-		0.0120412	0.844963	0.0107799	100	20.8296	0.390034	2755.11		0.331749	23.2797	0.296999	2755.11	573.878	10.7459
AAEL028145	Recognition	OtheRec	FREP	FREP	high	-	CG1791		0	0.690267	0	100	2.76555	0	147.157		0	1.01578	0	147.157	4.06971	0
AAEL006699	Recognition	OtheRec	FREP	FREP	high	-	CG1791		0	0.467599	0	100	2.15798	0.150466	289.644		0	1.35437	0	289.644	6.25046	0.435815
AAEL006702	Recognition	OtheRec	FREP	FREP	high	-	CG1791		0	0.451391	0	100	2.1015	0.314745	168.775		0	0.761834	0	168.775	3.54679	0.53121
AAEL007942	Recognition	OtheRec	FREP	FREP	high	-	CG30280		0	0.446871	0	100	18.5571	0.393923	113.654		0	0.507889	0	113.654	21.091	0.447712
AAEL006691	Recognition	OtheRec	FREP	FREP	high	-	CG1791		0.202007	0.35215	0	100	3.28447	0.148371	192.698		0.389264	0.678585	0	192.698	6.3291	0.285908
AAEL011007	Recognition	OtheRec	FREP	FREP	high	-	CG30280		2.41618	4.15059	10.2094	65.0962	100	0.0827296	363.821		8.79059	15.1007	37.144	236.834	363.821	0.300988
AAEL011009	Recognition	OtheRec	FREP	FREP	high	-	CG30280		7.70262	2.23738	42.7533	57.4605	100	1.88116	24.1382		1.85927	0.540062	10.3199	13.8699	24.1382	0.454078
AAEL013417	Recognition	OtheRec	FREP	FREP	high	-	CG30280		15.6652	10.1829	6.02273	1.42531	100	0.669688	25.5662		4.005	2.60338	1.53978	0.364398	25.5662	0.171214
AAEL014432	Recognition	OtheRec	FREP	FREP	high	-	CG30280		0	0	0	0	0	0	0.143012		0.143012	0	0	0	0	0
AAEL025451	Recognition	OtheRec	FREP	FREP	high	-	-		0	0	0	0	0	0	0.608342		0.090402	0	0	0.0744887	0	0.608342
AAEL023956	Recognition	OtheRec	FREP	FREP	high	-	CG9593		0	0	0	0	0	0	0.284179		0.0715059	0	0.140152	0.284179	0.163258	0
AAEL001713	Recognition	OtheRec	FREP	FREP	high	-	-		0	0	0	0	0	0	0.296628		0	0	0	0	0.102417	0.296628
AAEL008104	Recognition	OtheRec	FREP	FREP	high	-	CG30280		0	0	0	0	0	0	0.169296		0.0794395	0.169296	0.0843674	0.0363656	0.102418	0
AAEL012724	Recognition	OtheRec	LRIM	atypicalLRR	low	-	-		100	54.3275	79.7208	5.74547	0	4.99997	1.3973		1.3973	0.759119	1.11394	0.0802814	0	0.0698645
AAEL007785	Recognition	OtheRec	LRIM	atypicalLRR	low	-	CG4950		100	10.9577	1.82957	0.0434459	0	1.08117	83.7033		83.7033	9.17199	1.53141	0.0363656	0	0.904973
AAEL003331	Recognition	OtheRec	LRIM	atypicalLRR	high	-	conv		100	99.0639	64.8999	37.8582	53.7279	78.8526	3.05913		3.05913	3.03049	1.98537	1.15813	1.64361	2.4122
AAEL003115	Recognition	OtheRec	LRIM	atypicalLRR	high	-	Fili		100	34.4489	5.01203	2.52617	7.53594	4.20684	14.4608		14.4608	4.98158	0.72478	0.365304	1.08976	0.608342
AAEL003111	Recognition	OtheRec	LRIM	atypicalLRR	high	-	Fili		100	24.2615	4.37442	3.48637	86.1596	0.835159	9.2356		9.2356	2.2407	0.404004	0.321988	7.95736	0.077132
AAEL008398	Recognition	OtheRec	LRIM	atypicalLRR	high	-	Lrrk		100	14.7785	6.92473	5.74154	11.2978	77.0982	76.2308		76.2308	11.2658	5.27877	4.37682	8.61239	58.7725
AAEL027849	Recognition	OtheRec	LRIM	atypicalLRR	low	-	-		100	46.3729	19.1237	9.33944	19.903	17.4524	2.64501		2.64501	1.22657	0.505824	0.247029	0.526436	0.461618
AAEL003408	Recognition	OtheRec	LRIM	atypicalLRR	low	-	atk		100	16.5437	0	1.9058	21.8696	7.86998	2.23267		2.23267	0.369366	0	0.0425503	0.488275	0.175711
AAEL007127	Recognition	OtheRec	LRIM	atypicalLRR	low	-	CG13708		100	27.0391	5.13731	9.81254	0	22.437	6.56899		6.56899	1.7762	0.33747	0.644585	0	1.47388
AAEL012412	Recognition	OtheRec	LRIM	atypicalLRR	low	-	CG14762		100	7.49079	0.612046	0.715169	0.168047	0.613266	60.9463		60.9463	4.56536	0.373019	0.435869	0.102418	0.373763
AAEL023798	Recognition	OtheRec	LRIM	atypicalLRR	low	-	-		82.0807	100	71.3917	0	1.80699	3.61958	4.34987		3.57041	4.34987	3.10545	0	0.0786019	0.157447
AAEL000387	Recognition	OtheRec	LRIM	atypicalLRR	low	-	CG8852		57.2557	100	50.9455	1.35831	84.2737	2.47954	2.80665		1.60696	2.80665	1.42986	0.038123	2.36526	0.0695918
AAEL001766	Recognition	OtheRec	LRIM	atypicalLRR	high	-	-		26.081	100	8.86025	6.24044	1.01596	2.32119	23.21		6.05341	23.21	2.05647	1.44841	0.235806	0.53875
AAEL015019	Recognition	OtheRec	LRIM	atypicalLRR	high	-	-		31.71	37.7066	100	0	1.49547	0	5.25601		1.66668	1.98186	5.25601	0	0.0786019	0
AAEL012726	Recognition	OtheRec	LRIM	atypicalLRR	low	-	-		15.1482	21.3947	100	0.210674	0.191513	5.91964	41.0425		6.21719	8.78092	41.0425	0.086466	0.0786019	2.42957
AAEL000668	Recognition	OtheRec	LRIM	atypicalLRR	low	-	CG8852		64.1711	83.4465	100	3.51115	7.33258	4.47812	13.9215		8.9336	11.617	13.9215	0.488806	1.02081	0.623422
AAEL008365	Recognition	OtheRec	LRIM	atypicalLRR	low	-	-		43.5617	54.1991	100	0.19131	0.949877	0.198464	83.1323		36.2138	45.0569	83.1323	0.159041	0.789654	0.164987
AAEL007778	Recognition	OtheRec	LRIM	atypicalLRR	low	-	CG4950		25.886	44.5768	100	0.831768	2.33094	0.497328	542.521		140.437	241.839	542.521	4.51252	12.6459	2.69811
AAEL005221	Recognition	OtheRec	LRIM	atypicalLRR	low	-	CG32687		43.4888	38.5103	100	68.4181	60.2755	21.1162	152.231		66.2037	58.6248	152.231	104.154	91.7582	32.1456
AAEL000650	Recognition	OtheRec	LRIM	atypicalLRR	low	-	CG8852		24.8849	30.6532	100	0.0924754	1.11856	0	127.137		31.6379	38.9714	127.137	0.11757	1.4221	0
AAEL012722	Recognition	OtheRec	LRIM	atypicalLRR	low	-	-		30.3456	3.30705	100	2.4168	21.2255	0	3.37767		1.02498	0.111701	3.37767	0.0816315	0.716928	0
AAEL024532	Recognition	OtheRec	LRIM	atypicalLRR	low	-	-		0	0	0	100	93.637	42.7669	1.03668		0	0	0	1.03668	0.970714	0.443355
AAEL027836	Recognition	OtheRec	LRIM	atypicalLRR	low	-	CG9003		41.1839	23.2227	5.89202	26.4995	100	24.6952	34.2993		14.1258	7.96521	2.02092	9.08914	34.2993	8.47028
AAEL005762	Recognition	OtheRec	LRIM	atypicalLRR	low	-	CG18095		0.549194	0.142485	0.071006	15.7114	100	1.382	118.817		0.652536	0.169296	0.0843674	18.6678	118.817	1.64205
AAEL024346	Recognition	OtheRec	LRIM	atypicalLRR	high	-	LRR		53.7645	13.9585	15.963	26.2805	46.5531	100	44.8175		24.0959	6.25588	7.15423	11.7783	20.8639	44.8175
AAEL027361	Recognition	OtheRec	LRIM	atypicalLRR	low	-	CG3040		42.0234	36.8729	23.0852	14.2779	22.7185	100	27.246		11.4497	10.0464	6.2898	3.89017	6.18988	27.246
AAEL014027	Recognition	OtheRec	LRIM	atypicalLRR	low	-	-		19.9479	11.0946	9.22552	10.8913	18.2799	100	28.5637		5.69786	3.16903	2.63515	3.11095	5.22141	28.5637
AAEL026478	Recognition	OtheRec	LRIM	atypicalLRR	low	-	-		39.8392	33.8502	51.5721	2.54906	12.5752	100	20.003		7.96904	6.77107	10.316	0.509888	2.51542	20.003
AAEL021071	Recognition	OtheRec	LRIM	atypicalLRR	low	-	CG8852		19.8336	39.0249	54.2924	13.8629	11.7008	100	55.404		10.9886	21.6213	30.0802	7.68061	6.48271	55.404
AAEL002819	Recognition	OtheRec	LRIM	atypicalLRR	low	-	CG11807		27.3743	8.61505	5.60305	5.89796	9.46764	100	48.5589		13.2927	4.18338	2.72078	2.86399	4.59738	48.5589
AAEL010232	Recognition	OtheRec	LRIM	atypicalLRR	low	-	-		60.1867	35.06	3.38671	1.99715	5.12355	100	2.06915		1.24536	0.725445	0.0700762	0.0413241	0.106014	2.06915
AAEL010808	Recognition	OtheRec	LRIM	atypicalLRR	low	-	Lrr47		1.64427	0.218466	1.00453	0.71006	0.26003	100	39.3872		0.647632	0.0860478	0.395657	0.279673	0.102418	39.3872
AAEL025368	Recognition	OtheRec	LRIM	atypicalLRR	high	-	LRR		0	0	0	0	0	0	0.241685		0.148205	0.241685	0.0232544	0.0862957	0	0
AAEL024539	Recognition	OtheRec	LRIM	atypicalLRR	low	-	CG9003		0	0	0	0	0	0	0.438935		0	0	0	0	0	0.438935
AAEL024654	Recognition	OtheRec	LRIM	atypicalLRR	low	-	-		0	0	0	0	0	0	0.656216		0	0	0	0.137633	0	0.656216
AAEL012634	Recognition	OtheRec	LRIM	atypicalLRR	low	-	-		0	0	0	0	0	0	0.832198		0	0	0	0.345524	0.204837	0.832198
AAEL021586	Recognition	OtheRec	LRIM	atypicalLRR	low	-	-		0	0	0	0	0	0	0.413269		0	0	0.0843674	0.203113	0.413269	0.0695918
AAEL023577	Recognition	OtheRec	LRIM	atypicalLRR	low	-	-		0	0	0	0	0	0	0.263218		0.090402	0	0.0843674	0.203348	0.263218	0.0878553
AAEL027202	Recognition	OtheRec	LRIM	atypicalLRR	low	-	-		0	0	0	0	0	0	0.319222		0	0	0	0.319222	0	0.0695918
AAEL027960	Recognition	OtheRec	LRIM	atypicalLRR	low	-	-		0	0	0	0	0	0	0.212028		0	0	0	0.036209	0.212028	0.154264
AAEL009792	Recognition	OtheRec	LRIM	LRIM_other	high	LRIM25	CG8852		100	5.62501	0.774285	0.29794	0.444274	2.83834	69.9682		69.9682	3.93572	0.541754	0.208463	0.310851	1.98593
AAEL007224	Recognition	OtheRec	LRIM	LRIM_other	high	LRIM22	CG8852		100	4.64718	0.555489	0	0.220688	0.0497842	176.472		176.472	8.201	0.980284	0	0.389453	0.0878553
AAEL012255	Recognition	OtheRec	LRIM	LRIM_other	high	LRIM13	CG8852		63.004	54.7045	100	0.125564	0.0601806	0.11811	130.61		82.2895	71.4495	130.61	0.163999	0.0786019	0.154264
AAEL000762	Recognition	OtheRec	LRIM	LRIMCL	high	LRIM19	CG8852		100	41.7618	9.82609	0	3.99293	0.985812	14.8835		14.8835	6.21564	1.46247	0	0.59429	0.146724
AAEL012911	Recognition	OtheRec	LRIM	LRIMCL	high	LRIM18	igl		100	10.4878	3.8375	3.87097	9.72281	18.3862	141.171		141.171	14.8058	5.41742	5.46467	13.7257	25.956
AAEL010125	Recognition	OtheRec	LRIM	LRIMCL	high	LRIM17	alrm		39.0631	44.1338	100	0.0540227	0.459655	0	78.7636		30.7675	34.7613	78.7636	0.0425503	0.362041	0
AAEL006920	Recognition	OtheRec	LRIM	LRIMCL	high	LRIM20	CG8852		39.2647	39.3597	100	0.316752	0	0	13.4333		5.27455	5.28731	13.4333	0.0425503	0	0
AAEL009894	Recognition	OtheRec	LRIM	LRIMCL	high	LRIM21	-		27.6571	13.8386	21.6852	14.0234	60.5867	100	41.6392		11.5162	5.76227	9.02956	5.83923	25.2278	41.6392
AAEL012086	Recognition	OtheRec	LRIM	LRIML	high	LRIM1	-		50.4497	72.1825	100	0.937154	8.79567	0.102845	160.423		80.9329	115.797	160.423	1.50341	14.1103	0.164987
AAEL010128	Recognition	OtheRec	LRIM	LRIML	high	LRIM4	alrm		44.4444	58.5596	100	0.648705	0.417859	0.448779	49.8811		22.1694	29.2102	49.8811	0.323581	0.208433	0.223856
AAEL024406	Recognition	OtheRec	LRIM	LRIML	high	-	alrm		33.0177	42.0851	100	0.257002	8.45301	0.178326	296.102		97.7662	124.615	296.102	0.76099	25.0296	0.528027
AAEL010132	Recognition	OtheRec	LRIM	LRIML	high	LRIM3	alrm		19.0001	24.4154	100	0.271344	76.8981	0	30.2342		5.74453	7.38181	30.2342	0.0820388	23.2496	0
AAEL027236	Recognition	OtheRec	LRIM	LRIMS	high	-	CG8852		100	66.3766	89.8927	0	17.8369	14.3153	2.04989		2.04989	1.36064	1.8427	0	0.365636	0.293448
AAEL001414	Recognition	OtheRec	LRIM	LRIMS	high	LRIM9	CG8852		59.5136	77.0322	100	0.197578	0.701572	0.0163821	536.289		319.165	413.116	536.289	1.05959	3.76246	0.0878553
AAEL010656	Recognition	OtheRec	LRIM	LRIMS	high	LRIM12	CG8852		52.313	68.9701	100	1.98998	4.81936	1.98537	59.6622		31.2111	41.1491	59.6622	1.18727	2.87533	1.18451
AAEL004466	Recognition	OtheRec	LRIM	LRIMS	high	LRIM23	CG8852		92.257	63.5993	100	12.5023	4.63791	1.13873	6.11134		5.63814	3.88677	6.11134	0.764056	0.283439	0.0695918
AAEL012538	Recognition	OtheRec	LRIM	LRIMS	high	LRIM6	CG8852		41.289	58.7056	100	0.690388	2.79611	0	17.8484		7.36944	10.478	17.8484	0.123224	0.499063	0
AAEL012767	Recognition	OtheRec	LRIM	LRIMS	high	LRIM5	CG8852		46.3959	45.6459	100	0	47.2874	0	1.55405		0.721013	0.709359	1.55405	0	0.734869	0
AAEL012763	Recognition	OtheRec	LRIM	LRIMS	high	LRIM24	CG8852		36.7382	34.5796	100	0.763638	95.6817	1.11446	50.6573		18.6106	17.5171	50.6573	0.386838	48.4697	0.564554
AAEL001401	Recognition	OtheRec	LRIM	LRIMS	high	LRIM10A	CG8852		24.2685	32.0073	100	0.0993968	0.308112	0.0122553	567.851		137.809	181.753	567.851	0.564426	1.74962	0.0695918
AAEL001417	Recognition	OtheRec	LRIM	LRIMS	high	LRIM7	CG8852		23.0858	29.9445	100	0.26573	1.27922	0	16.0126		3.69664	4.79489	16.0126	0.0425503	0.204837	0
AAEL001420	Recognition	OtheRec	LRIM	LRIMS	high	LRIM8	CG8852		17.7692	28.5956	100	0.0719237	0.260484	0	1075.88		191.175	307.654	1075.88	0.773812	2.80249	0
AAEL001402	Recognition	OtheRec	LRIM	LRIMS	high	LRIM10B	CG8852		11.6247	20.3631	100	0.0802669	0.374303	0.0376938	826.956		96.1313	168.394	826.956	0.663772	3.09532	0.311711
AAEL008658	Recognition	OtheRec	LRIM	LRIMTM	high	LRIM16	CG4950		100	57.7266	46.2345	10.2712	4.60264	22.811	103.948		103.948	60.0057	48.0599	10.6767	4.78436	23.7116
AAEL007103	Recognition	OtheRec	LRIM	LRIMTM	high	LRIM15	CG4950		19.1323	22.6352	100	0.0745927	0.493904	0.049976	154.338		29.5284	34.9348	154.338	0.115125	0.762281	0.077132
AAEL026650	Recognition	OtheRec	LRIM	LRR-Toll	high	-	-		0	0	0.221429	0.33898	0.278243	100	38.1012		0	0	0.0843674	0.129156	0.106014	38.1012
AAEL012064	Recognition	OtheRec	ML	ML	high	-	Npc2b		100	86.3196	32.4481	5.41177	1.40708	41.6311	345.863		345.863	298.548	112.226	18.7173	4.86656	143.986
AAEL006854	Recognition	OtheRec	ML	ML	high	-	Npc2a		100	6.88764	3.01797	0.431759	0.107623	25.344	168.198		168.198	11.5849	5.07617	0.726212	0.18102	42.6282
AAEL020314	Recognition	OtheRec	ML	ML	high	-	Npc2a		100	4.94083	2.2563	0.0578295	0.146312	15.9142	126.18		126.18	6.23435	2.847	0.0729694	0.184616	20.0806
AAEL004120	Recognition	OtheRec	ML	ML	high	-	Npc2g		27.2871	35.6338	100	0.112929	2.60143	0.344831	359.394		98.0685	128.066	359.394	0.405862	9.34938	1.2393
AAEL009760	Recognition	OtheRec	ML	ML	high	-	Npc2c		0	0.472697	0.0203779	100	18.8741	0.119173	728.727		0	3.44468	0.148499	728.727	137.541	0.868446
AAEL007591	Recognition	OtheRec	ML	ML	high	-	Npc2c		0.31239	0.390629	0	100	1.34418	0.880298	25.4296		0.0794395	0.0993352	0	25.4296	0.34182	0.223856
AAEL015136	Recognition	OtheRec	ML	ML	high	-	Npc2c		0.0578334	0.0907088	0	100	6.13786	0	279.956		0.161908	0.253945	0	279.956	17.1833	0
AAEL009556	Recognition	OtheRec	ML	ML	high	-	Npc2c		3.5042	0	0	100	8.87102	7.71581	2.04058		0.0715059	0	0	2.04058	0.18102	0.157447
AAEL007592	Recognition	OtheRec	ML	ML	high	-	Npc2c		0.583908	0	0	100	0.95093	0.212554	41.3331		0.241347	0	0	41.3331	0.393049	0.0878553
AAEL026174	Recognition	OtheRec	ML	ML	high	-	Npc2c		0	0	0	100	3.46699	0	5.22125		0	0	0	5.22125	0.18102	0
AAEL001654	Recognition	OtheRec	ML	ML	high	-	Npc2c		0.618086	0.346614	0	0	100	0.631674	24.4214		0.150945	0.0846482	0	0	24.4214	0.154264
AAEL025109	Recognition	OtheRec	ML	ML	high	-	Npc2f		1.35728	1.19813	0.676864	13.6091	100	5.41047	57.2213		0.776652	0.685583	0.38731	7.78728	57.2213	3.09594
AAEL001650	Recognition	OtheRec	ML	ML	high	-	Npc2c		0.0576285	0.0693482	0	0	100	0	124.081		0.0715059	0.0860478	0	0	124.081	0
AAEL009956	Recognition	OtheRec	ML	ML	high	-	Npc2c		0	0	0	0	0	0	0		0	0	0	0	0	0
AAEL015140	Recognition	OtheRec	ML	ML	high	-	Npc2c		0	0	0	0	0	0	0.490605		0	0	0	0	0.102418	0.490605
AAEL001634	Recognition	OtheRec	ML	ML	high	-	Npc2c		0	0	0	0	0	0	0.102418		0	0	0	0	0.102418	0
AAEL015137	Recognition	OtheRec	ML	ML	high	-	Npc2c		0	0	0	0	0	0	0		0	0	0	0	0	0
AAEL009553	Recognition	OtheRec	ML	ML	high	-	Npc2c		0	0	0	0	0	0	0.0860478		0	0.0860478	0	0	0	0
AAEL009555	Recognition	OtheRec	ML	ML	high	-	Npc2c		0	0	0	0	0	0	0		0	0	0	0	0	0
AAEL015139	Recognition	OtheRec	ML	ML	high	-	Npc2c		0	0	0	0	0	0	0.245302		0	0	0	0.204165	0	0.245302
AAEL027949	Recognition	OtheRec	NIMROD	DRAPER	high	-	drpr		33.4347	11.9104	14.8898	14.9798	79.0029	100	93.989		31.425	11.1944	13.9948	14.0794	74.254	93.989
AAEL019649	Recognition	OtheRec	NIMROD	EATER	high	-	eater		100	51.3092	55.7849	1.46011	28.1469	31.0037	2.61097		2.61097	1.33967	1.45653	0.038123	0.734908	0.809498
AAEL026517	Recognition	OtheRec	NIMROD	NIMA	high	-	NimA		100	9.5003	2.78104	0.110557	0	27.6658	32.8932		32.8932	3.12495	0.914773	0.0363656	0	9.10016
AAEL019650	Recognition	OtheRec	NIMROD	NIMC	high	-	NimB2		100	68.0149	50.0086	0.625707	0.807167	0.205421	110.524		110.524	75.1726	55.2715	0.691555	0.892112	0.227039
AAEL000636	Recognition	OtheRec	NIMROD	NIMC	high	-	NimC1		69.9268	65.2305	100	7.35201	53.319	69.1814	3.37068		2.35701	2.19871	3.37068	0.247813	1.79721	2.33188
AAEL021410	Recognition	OtheRec	NIMROD	NIMC	high	-	NimC2		0	0	0	0	0	0	0.853723		0.479666	0.169296	0.16279	0	0	0.853723
AAEL008607	Recognition	OtheRec	TEP	TEP	high	-	Tep1		67.6971	100	76.6037	9.02323	4.00976	7.59306	353.347		239.206	353.347	270.677	31.8833	14.1684	26.8299
AAEL017023	Recognition	OtheRec	TEP	TEP	high	-	-		34.6491	94.2515	100	0.262478	4.86393	0	119.938		41.5575	113.044	119.938	0.314812	5.83371	0
AAEL025055	Recognition	OtheRec	TEP	TEP	high	-	-		26.1862	40.115	100	4.90381	18.7863	30.9793	15.6838		4.10698	6.29154	15.6838	0.769103	2.9464	4.85872
AAEL001794	Recognition	OtheRec	TEP	TEP	high	-	Tep2		42.5092	70.7279	100	0.357887	19.8518	4.39226	191.116		81.2417	135.172	191.116	0.683978	37.9399	8.39428
AAEL012267	Recognition	OtheRec	TEP	TEP	high	-	Mcr		38.6222	24.8658	9.57952	10.8885	14.4648	100	37.159		14.3516	9.23986	3.55965	4.04605	5.37498	37.159
AAEL000087	Recognition	OtheRec	TEP	TEP	high	-	-		42.2398	41.6879	75.8263	0.0958673	4.44306	100	37.9333		16.023	15.8136	28.7634	0.0363656	1.6854	37.9333
AAEL019958	Recognition	OtheRec	TEP	TEP	high	-	-		5.11018	2.72999	1.22645	0	1.3496	100	6.36711		0.325371	0.173822	0.0780893	0	0.0859306	6.36711
AAEL025334	Recognition	OtheRec	TEP	TEP	low	-	-		4.5556	12.7352	0	0	0	100	3.55404		0.161908	0.452615	0	0	0	3.55404
AAEL001163	Recognition	OtheRec	TEP	TEP	high	-	Tep2		0	0	0	0	0	0	0.631963		0	0.352904	0.631963	0	0.331334	0.60709
AAEL019959	Recognition	OtheRec	TEP	TEP	high	-	-		0	0	0	0	0	0	0.415893		0.090402	0.283563	0.415893	0	0	0.164987
AAEL013072	RNAinterference	piRNA	piRNA	piRNA	high	-	papi		53.5607	97.1162	39.6578	15.4041	61.7615	100	23.0111		12.3249	22.3475	9.1257	3.54465	14.212	23.0111
AAEL000289	RNAinterference	piRNA	piRNA	piRNA	high	-	Gasz		23.5683	10.948	11.2362	9.33804	20.7853	100	40.9529		9.65192	4.48351	4.60155	3.8242	8.51217	40.9529
AAEL010029	RNAinterference	piRNA	piRNA	piRNA	high	-	Hen1		27.1327	12.4381	9.61171	9.55512	15.4895	100	82.4137		22.3611	10.2507	7.92137	7.87473	12.7655	82.4137
AAEL009326	RNAinterference	piRNA	piRNA	piRNA	high	-	Fmr1		20.8474	11.7891	14.5734	10.3661	12.3573	100	202.437		42.203	23.8656	29.5019	20.9849	25.0159	202.437
AAEL012437	RNAinterference	piRNA	piRNA	piRNA	high	-	-		5.52019	3.38843	4.9797	6.33385	4.38929	100	104.385		5.76226	3.53701	5.19806	6.6116	4.58176	104.385
AAEL001939	RNAinterference	piRNA	piRNA	piRNA	high	-	SoYb		5.00067	3.20003	3.6818	1.96987	3.00547	100	191.678		9.5852	6.13376	7.05721	3.77582	5.76083	191.678
AAEL000293	RNAinterference	piRNA	SRRP	TSN	high	-	Tudor-SN		21.0358	18.418	53.344	39.4321	16.6649	100	167.446		35.2236	30.8402	89.3225	66.0275	27.9048	167.446
AAEL020359	RNAinterference	RNAi	-	-	high	-	vret		6.62069	7.7342	12.6291	4.02182	5.38353	100	71.3476		4.72371	5.51817	9.01058	2.86947	3.84102	71.3476
AAEL021734	RNAinterference	RNAi	RNAi	RNAi	high	-	mino		40.2507	100	55.5467	2.0253	23.1423	32.3402	3.42431		1.37831	3.42431	1.90209	0.0693525	0.792464	1.10743
AAEL007080	RNAinterference	RNAi	RNAi	RNAi	high	-	mino		72.5448	90.8452	59.8908	8.54096	26.183	100	82.8032		60.0694	75.2227	49.5915	7.07218	21.6803	82.8032
AAEL027589	RNAinterference	RNAi	RNAi	RNAi	high	-	qin		7.49763	4.51294	3.91543	2.22456	5.69396	100	92.7907		6.9571	4.18759	3.63315	2.06418	5.28346	92.7907
AAEL013721	RNAinterference	RNAi	RNAi	RNAi	high	loqs2	-		0	0	0.386551	0.267225	0	100	43.6513		0	0	0.168735	0.116647	0	43.6513
AAEL021382	RNAinterference	RNAi	RNAi	RNAi	high	-	mino		0	0	0	0	0	0	0		0	0	0	0	0	0
AAEL019460	RNAinterference	RNAi	SRRP	Armitage	high	-	armi		25.0076	20.6728	23.0939	23.1879	45.5505	100	173.324		43.3441	35.831	40.0272	40.1901	78.9498	173.324
AAEL026022	RNAinterference	RNAi	SRRP	DSRNA	high	-	pasha		100	22.7356	35.2493	31.7803	24.0217	72.2623	14.505		14.505	3.29779	5.1129	4.60972	3.48434	10.4816
AAEL006794	RNAinterference	RNAi	SRRP	DSRNA	high	-	Dcr-2		75.8748	34.6118	57.0046	100	78.6579	75.7172	73.3829		55.6791	25.3991	41.8317	73.3829	57.7215	55.5635
AAEL011753	RNAinterference	RNAi	SRRP	DSRNA	high	-	r2d2		43.586	19.7909	29.9175	23.1903	22.2353	100	30.5063		13.2965	6.03748	9.12672	7.07448	6.78316	30.5063
AAEL021519	RNAinterference	RNAi	SRRP	DSRNA	high	-	pasha		45.7311	19.0443	4.38265	17.6062	11.9754	100	17.8779		8.17574	3.40471	0.783524	3.14762	2.14094	17.8779
AAEL008687	RNAinterference	RNAi	SRRP	DSRNA	high	loqs	loqs		32.0177	18.8717	36.0075	9.62974	9.66318	100	85.9677		27.5249	16.2236	30.9549	8.27847	8.30722	85.9677
AAEL001612	RNAinterference	RNAi	SRRP	DSRNA	high	-	Dcr-1		11.939	4.6186	4.14173	2.15363	7.79312	100	22.1447		2.64386	1.02278	0.917175	0.476915	1.72576	22.1447
AAEL008592	RNAinterference	RNAi	SRRP	DSRNA	high	-	drosha		3.55744	2.00312	2.16181	0.998751	0	100	36.8792		1.31196	0.738733	0.797259	0.368331	0	36.8792
AAEL013233	RNAinterference	RNAi	SRRP	PAZPIWI	high	PIWI5	aub		75.1132	37.1127	100	52.1488	35.3618	91.5575	34.6403		26.0194	12.8559	34.6403	18.0645	12.2494	31.7158
AAEL012410	RNAinterference	RNAi	SRRP	PAZPIWI	high	AGO1b	AGO1		78.1553	30.3386	20.5366	32.3342	35.1251	100	152.978		119.56	46.4113	31.4164	49.4641	53.7336	152.978
AAEL017251	RNAinterference	RNAi	SRRP	PAZPIWI	high	AGO2	AGO2		43.7473	25.0763	17.8921	26.3765	24.1937	100	49.8194		21.7946	12.4928	8.91372	13.1406	12.0531	49.8194
AAEL007698	RNAinterference	RNAi	SRRP	PAZPIWI	high	PIWI4	aub		11.8988	9.15604	17.6841	8.03459	6.24208	100	149.135		17.7453	13.6548	26.3731	11.9824	9.3091	149.135
AAEL013227	RNAinterference	RNAi	SRRP	PAZPIWI	high	PIWI6	aub		19.1481	11.4046	8.47342	4.9393	3.84072	100	154.277		29.5411	17.5947	13.0725	7.6202	5.92535	154.277
AAEL007823	RNAinterference	RNAi	SRRP	PAZPIWI	high	-	AGO3		3.76318	3.0371	5.43258	1.89729	2.83293	100	109.896		4.13557	3.33764	5.97017	2.08504	3.11326	109.896
AAEL008098	RNAinterference	RNAi	SRRP	PAZPIWI	high	PIWI2	aub		0.0876142	0	0	0.142924	0.129896	100	81.6146		0.0715059	0	0	0.116647	0.106014	81.6146
AAEL013692	RNAinterference	RNAi	SRRP	PAZPIWI	high	PIWI3	aub		0	0.0842346	0.214626	0.0323277	0.066653	100	117.927		0	0.0993352	0.253102	0.038123	0.0786019	117.927
AAEL021425	RNAinterference	RNAi	SRRP	PAZPIWI	high	-	aub		0	0	0	0	0	0	0.0700762		0	0	0.0700762	0	0	0.0695918
AAEL006287	RNAinterference	RNAi	SRRP	PAZPIWI	high	PIWI7	aub		0	0	0	0	0	0	0.773623		0.773623	0.283319	0.692656	0.320979	0.747897	0.469158
AAEL009287	RNAinterference	RNAi	SRRP	Ran	high	-	Ran		17.2783	17.1558	37.4994	19.1696	16.3194	100	678.179		117.178	116.347	254.313	130.005	110.675	678.179
AAEL009392	RNAinterference	RNAi	SRRP	RanBP21	high	-	Ranbp21		16.2356	5.66854	19.7388	5.79862	9.23152	100	198.953		32.3012	11.2777	39.2709	11.5365	18.3664	198.953
AAEL002083	RNAinterference	RNAi	SRRP	Rm62	high	-	CG10077		100	23.0061	21.8352	24.4763	39.1008	78.239	1122.7		1122.7	258.288	245.143	274.795	438.983	878.386
AAEL010787	RNAinterference	RNAi	SRRP	Rm62	high	-	Rm62		35.2815	30.3464	100	38.4642	46.8422	52.8646	3260.02		1150.19	989.3	3260.02	1253.94	1527.07	1723.4
AAEL008738	RNAinterference	RNAi	SRRP	Rm62	high	-	mahe		99.2507	58.2645	42.8095	29.8014	43.9513	100	686.881		681.734	400.208	294.05	204.7	301.893	686.881
AAEL001769	RNAinterference	RNAi	SRRP	Rm62	high	-	mahe		73.5283	30.4355	33.4696	29.4999	41.9962	100	114.402		84.1177	34.8188	38.2899	33.7484	48.0444	114.402
AAEL004472	RNAinterference	RNAi	SRRP	Rm62	high	-	bel		36.4512	34.3144	30.5784	25.3477	24.9628	100	659.497		240.395	226.303	201.664	167.167	164.629	659.497
AAEL002351	RNAinterference	RNAi	SRRP	Rm62	high	-	CG10077		65.2922	15.0126	16.8003	11.4353	20.7937	100	39.2405		25.6209	5.89103	6.5925	4.48728	8.15953	39.2405
AAEL001657	RNAinterference	RNAi	SRRP	Rm62	high	-	CG10333		75.6217	60.0503	26.4221	25.6343	20.6285	100	29.6646		22.4329	17.8137	7.83802	7.60431	6.11936	29.6646
AAEL013985	RNAinterference	RNAi	SRRP	Rm62	high	-	CG6227		33.3693	26.7645	24.5608	18.7129	16.8536	100	52.6333		17.5634	14.0871	12.9271	9.8492	8.87062	52.6333
AAEL001317	RNAinterference	RNAi	SRRP	Rm62	high	-	CG6418		49.2078	23.4534	9.98284	8.75113	14.6486	100	91.8042		45.1748	21.5312	9.16466	8.03391	13.448	91.8042
AAEL012962	RNAinterference	RNAi	SRRP	Rm62	high	-	CG5589		14.6025	30.8764	40.9191	15.8668	13.2767	100	51.8595		7.57277	16.0123	21.2205	8.22845	6.88523	51.8595
AAEL010402	RNAinterference	RNAi	SRRP	Rm62	high	-	CG7878		5.86139	4.32661	6.89127	2.98363	2.8693	100	243.826		14.2916	10.5494	16.8027	7.27487	6.99612	243.826
AAEL004978	RNAinterference	RNAi	SRRP	Rm62	high	-	vas		0.407702	0.292275	0.410418	0.344184	0.397561	100	1769.05		7.21244	5.17049	7.26048	6.08878	7.03304	1769.05
AAEL023716	RNAinterference	RNAi	SRRP	Spindle_E	high	-	spn-E		14.7377	10.1779	10.8132	6.26218	10.4719	100	165.655		24.4138	16.8602	17.9127	10.3736	17.3472	165.655
AAEL008073	RNAinterference	RNAi	SRRP	VIG	high	-	FDY		94.5596	54.6805	100	38.0001	25.3026	25.3589	424.735		401.627	232.247	424.735	161.4	107.469	107.708
AAEL013434	Signal Transduction	Cytokin	SPZ	SPZ	high	-	spz		80.5772	100	38.9095	12.4292	3.44406	19.5784	26.5933		21.4281	26.5933	10.3473	3.30534	0.915889	5.20654
AAEL013433	Signal Transduction	Cytokin	SPZ	SPZ	high	SPZ1C	spz		28.951	41.6517	100	0	0.941761	2.79692	10.8752		3.14848	4.52971	10.8752	0	0.102418	0.304171
AAEL001929	Signal Transduction	Cytokin	SPZ	SPZ	high	SPZ5	spz5		0.332461	0.238086	0	0.0750071	100	0.701302	196.275		0.652536	0.467302	0	0.14722	196.275	1.37648
AAEL007897	Signal Transduction	Cytokin	SPZ	SPZ	high	SPZ4	spz4		21.4896	7.84564	8.02283	6.87596	100	42.5593	13.3571		2.87039	1.04795	1.07162	0.91843	13.3571	5.68469
AAEL008596	Signal Transduction	Cytokin	SPZ	SPZ	high	SPZ3A	spz3		19.0319	40.3093	39.3127	3.25634	100	14.3536	45.1784		8.59833	18.2111	17.7608	1.47116	45.1784	6.48472
AAEL001435	Signal Transduction	Cytokin	SPZ	SPZ	high	SPZ2	NT1		0	0	0	0	0	0	0.625707		0.625707	0.443526	0.253102	0.154613	0	0.157447
AAEL012164	Signal Transduction	Cytokin	SPZ	SPZ	high	SPZ6	spz6		0	0	0	0	0	0	0.170696		0.158879	0.170696	0	0	0	0.139184
AAEL021557	Signal Transduction	PathMod	IMDMOD	PIRK	high	pirk	pirk		1.988	3.08319	2.94456	100	3.78671	3.40844	67.3434		1.33879	2.07633	1.98297	67.3434	2.5501	2.29536
AAEL013253	Signal Transduction	PathMod	IMDMOD	UBIQUI	high	-	CYLD		52.3564	58.6095	17.9873	16.6866	35.837	100	68.6654		35.9507	40.2444	12.3511	11.4579	24.6076	68.6654
AAEL011873	Signal Transduction	PathMod	IMDMOD	UBIQUI	high	Uev1A	Uev1A		70.975	21.1566	25.62	17.7088	28.5935	100	236.663		167.972	50.0699	60.6332	41.9101	67.6702	236.663
AAEL014642	Signal Transduction	PathMod	IMDMOD	UBIQUI	high	ben	ben		51.2905	18.5081	24.1269	15.1805	15.7392	100	236.346		121.223	43.7431	57.023	35.8787	37.1991	236.346
AAEL003103	Signal Transduction	PathMod	IMDMOD	UBIQUI	high	eff	eff		39.6672	32.9419	28.6477	16.4719	15.0391	100	492.27		195.27	162.163	141.024	81.0862	74.0329	492.27
AAEL023060	Signal Transduction	PathMod	IMDMOD	UBIQUI	high	-	scny		3.25857	3.06241	8.79201	2.62352	4.08859	100	55.8982		1.82148	1.71183	4.91457	1.4665	2.28545	55.8982
AAEL021793	Signal Transduction	PathMod	IMDMOD	UBIQUI	high	-	POSH		29.6542	4.19246	3.1834	2.35905	1.71919	100	27.4322		8.1348	1.15009	0.873279	0.64714	0.471611	27.4322
AAEL026694	Signal Transduction	PathMod	JASTMOD	PIAS	high	PIAS2	Su(var)2-10		14.9856	6.17748	9.56241	5.43737	6.72176	100	168.416		25.2382	10.4038	16.1046	9.1574	11.3205	168.416
AAEL015099	Signal Transduction	PathMod	JASTMOD	PIAS	high	PIAS1	Su(var)2-10		5.82374	9.03645	9.9408	8.24634	0	100	9.01241		0.524859	0.814401	0.895905	0.743193	0	9.01241
AAEL001919	Signal Transduction	PathMod	JASTMOD	PTP61F	high	-	Ptp61F		44.9497	17.9406	17.7668	14.7441	33.8511	100	83.3797		37.479	14.9588	14.8139	12.2936	28.225	83.3797
AAEL019728	Signal Transduction	PathMod	JASTMOD	SOCS	high	SOCS	Socs36E		46.917	41.3986	16.0398	14.9717	85.6733	100	157.171		73.7401	65.0667	25.2099	23.5312	134.654	157.171
AAEL000255	Signal Transduction	PathMod	JASTMOD	SOCS	high	-	Socs44A		8.19694	2.84741	2.36505	3.47743	4.55096	100	12.4562		1.02103	0.354679	0.294596	0.433156	0.566877	12.4562
AAEL000709	Signal Transduction	PathMod	TOLLMOD	CACT	high	cact	cact		22.6036	53.7791	32.0865	23.3606	5.344	100	190.202		42.9926	102.289	61.0291	44.4323	10.1644	190.202
AAEL013167	Signal Transduction	PathMod	TOLLMOD	CACTIN	high	-	cactin		34.4092	18.4502	10.7483	11.5558	10.4556	100	36.9644		12.7191	6.82002	3.97302	4.27151	3.86484	36.9644
AAEL005339	Signal Transduction	PathMod	TOLLMOD	HRS	high	-	Hrs		81.7138	14.6129	13.2403	14.1691	25.2042	100	52.0283		42.5143	7.60286	6.88872	7.37191	13.1133	52.0283
AAEL018205	Signal Transduction	PathMod	TOLLMOD	MOP	high	-	mop		100	11.529	5.29865	9.91506	26.4471	48.1657	96.1877		96.1877	11.0895	5.09665	9.53706	25.4388	46.3295
AAEL021839	Signal Transduction	PathMod	TOLLMOD	PELLINO	high	-	Pli		23.5543	14.5024	7.97444	9.10238	16.1837	100	101.112		23.8162	14.6636	8.06308	9.20356	16.3636	101.112
AAEL025779	Signal Transduction	PathMod	TOLLMOD	UBIQUI	high	-	lwr		64.6946	40.692	32.6823	23.4611	23.9232	100	133.717		86.5077	54.4121	43.7019	31.3715	31.9894	133.717
AAEL027903	Signal Transduction	PathMod	TOLLMOD	UBIQUI	high	-	lwr		18.0529	8.57258	20.8606	11.4575	10.8876	100	452.811		81.7453	38.8176	94.4592	51.8808	49.3	452.811
AAEL003371	Signal Transduction	PathMod	TOLLMOD	UBIQUI	high	-	slmb		22.9431	7.24588	5.02433	6.02342	6.60709	100	416.01		95.4456	30.1436	20.9017	25.058	27.4861	416.01
AAEL022729	Signal Transduction	PathSig	IMDSIG	AKIRIN	high	-	akirin		38.804	23.4487	22.3047	18.1513	22.4521	100	294.094		114.12	68.961	65.5968	53.3817	66.0303	294.094
AAEL027860	Signal Transduction	PathSig	IMDSIG	CASPAR	high	casp	casp		16.3614	15.2884	13.7747	9.60326	10.9077	100	395.829		64.7633	60.5158	54.5242	38.0125	43.176	395.829
AAEL010083	Signal Transduction	PathSig	IMDSIG	DEATH	high	IMD	imd		59.1328	21.8638	72.9718	42.6834	50.5347	100	2.02218		1.19577	0.442127	1.47562	0.863136	1.0219	2.02218
AAEL001932	Signal Transduction	PathSig	IMDSIG	DEATH	high	FADD	Fadd		33.4607	21.7312	19.8557	13.349	8.29017	100	16.9811		5.68199	3.69019	3.3717	2.2668	1.40776	16.9811
AAEL000590	Signal Transduction	PathSig	IMDSIG	DNR1	high	DNR1	dnr1		37.6073	25.1029	19.7957	13.2137	16.1722	100	145.468		54.7064	36.5166	28.7963	19.2216	23.5253	145.468
AAEL014557	Signal Transduction	PathSig	IMDSIG	HOMEOBOX	high	cad	cad		0.12262	0	0	29.1559	100	27.0836	64.7851		0.0794395	0	0	18.8886	64.7851	17.5461
AAEL023627	Signal Transduction	PathSig	IMDSIG	IKK	high	-	key		36.8256	100	30.7567	13.1605	5.85757	0.134519	12.7801		4.70635	12.7801	3.93075	1.68192	0.748605	0.0171917
AAEL012510	Signal Transduction	PathSig	IMDSIG	IKK	high	IKK2	key		44.1481	7.62807	4.94522	25.3384	28.3262	100	31.1751		13.7632	2.37806	1.54168	7.89927	8.83071	31.1751
AAEL005073	Signal Transduction	PathSig	IMDSIG	IKK	high	-	key		31.9235	5.50974	25.1806	7.48411	6.55797	100	1.56174		0.498562	0.0860478	0.393255	0.116882	0.102418	1.56174
AAEL003245	Signal Transduction	PathSig	IMDSIG	IKK	high	IKK1	IKKbeta		12.8192	0.404204	2.0013	6.33607	0.344006	100	27.4303		3.51635	0.110874	0.548961	1.738	0.0943618	27.4303
AAEL005079	Signal Transduction	PathSig	IMDSIG	IKK	high	-	key		0	0	0	0	0	0	0.463799		0.463799	0.258143	0	0.121466	0.106014	0.300988
AAEL018130	Signal Transduction	PathSig	IMDSIG	KINASE	high	TAK1	Tak1		54.9278	100	23.8625	15.9198	22.2077	97.1658	21.8068		11.978	21.8068	5.20365	3.47159	4.84278	21.1888
AAEL007624	Signal Transduction	PathSig	IMDSIG	REL	high	REL2	Rel		29.67	44.3963	88.0196	44.5199	100	19.2686	21.846		6.48172	9.69881	19.2288	9.72582	21.846	4.20941
AAEL026170	Signal Transduction	PathSig	IMDSIG	TAB2	high	tab2	Tab2		7.84362	21.7676	11.6067	7.4839	9.47386	100	56.3088		4.41665	12.2571	6.53558	4.21409	5.33461	56.3088
AAEL012471	Signal Transduction	PathSig	JASTSIG	DOME	high	DOME	dome		31.8428	11.5059	6.05987	7.6567	34.7051	100	87.8139		27.9624	10.1038	5.32141	6.72364	30.4759	87.8139
AAEL012553	Signal Transduction	PathSig	JASTSIG	HOP	high	HOP	hop		18.369	8.25501	12.4281	6.86257	77.0217	100	48.8297		8.96952	4.03089	6.06858	3.35097	37.6094	48.8297
AAEL020559	Signal Transduction	PathSig	JASTSIG	STAT	high	STAT	Stat92E		56.4631	39.8992	31.7341	23.4965	40.4981	100	328.67		185.577	131.137	104.3	77.2259	133.105	328.67
AAEL000200	Signal Transduction	PathSig	JASTSIG	VAGO	high	-	CG14132		23.2711	44.8324	100	10.1447	1.03302	0.105313	800.392		186.26	358.835	800.392	81.1972	8.26821	0.842921
AAEL004000	Signal Transduction	PathSig	TOLL	TOLL	high	TOLL10	Tollo		100	23.2215	4.67936	3.14473	0	2.71409	12.948		12.948	3.00673	0.605886	0.407181	0	0.351421
AAEL000633	Signal Transduction	PathSig	TOLL	TOLL	high	TOLL8	Tollo		100	69.0262	35.9981	16.8969	6.89664	7.5564	4.90418		4.90418	3.38517	1.76541	0.828657	0.338224	0.37058
AAEL009551	Signal Transduction	PathSig	TOLL	TOLL	high	TOLL11	Toll-6		100	48.3162	14.0348	16.5243	21.2461	16.1657	12.4445		12.4445	6.01272	1.74656	2.05637	2.64397	2.01174
AAEL000671	Signal Transduction	PathSig	TOLL	TOLL	high	TOLL6	Toll-6		100	29.7502	4.89849	0	0	2.7129	8.36887		8.36887	2.48975	0.409948	0	0	0.227039
AAEL002583	Signal Transduction	PathSig	TOLL	TOLL	high	TOLL7	Toll-7		100	12.6302	6.78411	3.32291	2.35696	7.3441	57.2492		57.2492	7.2307	3.88385	1.90234	1.34934	4.20444
AAEL007619	Signal Transduction	PathSig	TOLL	TOLL	high	TOLL5A	Tl		81.1312	64.1154	100	7.55361	53.2678	29.0209	10.7769		8.74342	6.90965	10.7769	0.814044	5.74061	3.12756
AAEL013441	Signal Transduction	PathSig	TOLL	TOLL	high	TOLL9A	Toll-9		0.698477	0.365176	2.71148	100	5.79609	0.300222	23.1801		0.161908	0.0846482	0.628524	23.1801	1.34354	0.0695918
AAEL014896	Signal Transduction	PathSig	TOLL	TOLL	high	-	Toll-9		0.181991	0.0928311	0.0655675	100	1.81494	8.68808	474.763		0.864025	0.440727	0.31129	474.763	8.61664	41.2477
AAEL026297	Signal Transduction	PathSig	TOLL	TOLL	high	-	Tl		33.114	18.5398	12.5874	3.80794	44.508	100	37.9898		12.5799	7.04324	4.78193	1.44663	16.9085	37.9898
AAEL000057	Signal Transduction	PathSig	TOLL	TOLL	high	TOLL5B	Tl		16.3487	21.9891	11.3559	5.98121	5.50787	100	1.92478		0.314677	0.423241	0.218575	0.115125	0.106014	1.92478
AAEL027951	Signal Transduction	PathSig	TOLL	TOLL	high	-	Tl		0	0	0	0	0	0	0.0425503		0	0	0	0.0425503	0	0
AAEL007768	Signal Transduction	PathSig	TOLLSIG	DEATH	high	MYD	Myd88		78.2614	27.5057	51.4723	51.5497	42.8064	100	8.61425		6.74164	2.36941	4.43395	4.44062	3.68745	8.61425
AAEL006571	Signal Transduction	PathSig	TOLLSIG	DEATH	high	PELLE	pll		94.3672	43.4214	23.1621	23.4512	26.251	100	20.113		18.9801	8.73334	4.6586	4.71674	5.27987	20.113
AAEL007642	Signal Transduction	PathSig	TOLLSIG	DEATH	high	TUBE	-		21.1806	7.09654	6.23031	6.18263	14.0336	100	93.6097		19.8271	6.64305	5.83218	5.78755	13.1369	93.6097
AAEL007696	Signal Transduction	PathSig	TOLLSIG	REL	high	REL1A	dl		19.18	45.1671	21.5117	9.50977	13.9553	100	169.939		32.5943	76.7567	36.5569	16.1608	23.7156	169.939
AAEL027765	Signal Transduction	PathSig	TOLLSIG	REL	high	-	dl		0	0	0	0	0	0	0		0	0	0	0	0	0
AAEL006930	Signal Transduction	PathSig	TOLLSIG	REL	high	REL1B	dl		0	0	0	0	0	0	0.0860478		0	0.0860478	0	0	0	0
AAEL028236	Signal Transduction	PathSig	TOLLSIG	TRAF	high	-	Traf-like		100	7.1157	6.92183	24.1582	75.7728	4.8287	16.0153		16.0153	1.1396	1.10855	3.86899	12.1352	0.773329
AAEL021581	Stress	CaspaseSig	BCL2	Bcl2	high	-	Buffy		29.9626	8.86838	5.1036	100	18.648	22.0896	45.0902		13.5102	3.99877	2.30122	45.0902	8.4084	9.96023
AAEL001515	Stress	CaspaseSig	BCL2	Bcl2	high	DEBCL	Debcl		12.4345	11.7199	22.6114	5.52962	17.3494	100	40.0639		4.98175	4.69546	9.05904	2.21538	6.95084	40.0639
AAEL026744	Stress	CaspaseSig	CASP	Caspase	high	-	-		7.52292	4.08298	4.00625	100	4.85454	2.93418	30.9605		2.32913	1.26411	1.24035	30.9605	1.50299	0.908435
AAEL011562	Stress	CaspaseSig	CASP	CASPL	high	Dronc	Dronc		30.7075	21.5416	20.0669	14.7706	43.7294	100	55.5291		17.0516	11.9619	11.143	8.20198	24.2826	55.5291
AAEL014148	Stress	CaspaseSig	CASP	CASPL	high	Dredd	Dredd		21.6381	24.8386	19.0679	15.4181	18.8876	100	14.6736		3.17508	3.64471	2.79794	2.26239	2.77148	14.6736
AAEL017498	Stress	CaspaseSig	CASP	CASPS	high	CASPS21	Damm		15.3088	6.95388	0	100	2.7892	4.20113	3.67196		0.562134	0.255344	0	3.67196	0.102418	0.154264
AAEL005955	Stress	CaspaseSig	CASP	CASPS	high	CASPS17	Damm		0	1.16275	0	100	17.0483	40.1244	7.28003		0	0.0846482	0	7.28003	1.24112	2.92107
AAEL003439	Stress	CaspaseSig	CASP	CASPS	high	CASPS18	Decay		0	0	0	100	6.45205	1.89067	4.0796		0	0	0	4.0796	0.263218	0.077132
AAEL003444	Stress	CaspaseSig	CASP	CASPS	high	CASPS19	Decay		2.81526	1.47549	2.43375	47.046	100	2.81742	18.2063		0.512553	0.268632	0.443095	8.56532	18.2063	0.512947
AAEL014348	Stress	CaspaseSig	CASP	CASPS	high	CASPS8	-		67.9341	59.9116	42.3377	49.4049	100	39.1363	5.76942		3.9194	3.45655	2.44264	2.85038	5.76942	2.25794
AAEL005956	Stress	CaspaseSig	CASP	CASPS	high	CASPS16	Damm		2.97695	1.41919	4.35235	20.8923	18.1632	100	55.8492		1.6626	0.792607	2.43075	11.6682	10.144	55.8492
AAEL012143	Stress	CaspaseSig	CASP	CASPS	high	CASPS7	Dcp-1		0.971583	1.45106	0.453363	0.78943	0	100	18.6092		0.180804	0.270031	0.0843674	0.146907	0	18.6092
AAEL000874	Stress	CaspaseSig	CASPA	ARK	high	ARK	Dark		100	41.5176	35.538	43.9397	21.2528	97.3851	5.8671		5.8671	2.43588	2.08505	2.57798	1.24692	5.71368
AAEL009074	Stress	CaspaseSig	IAP	IAP	high	IAP1	Diap1		33.2668	30.4601	30.5094	100	83.4386	66.9139	39.2179		13.0465	11.9458	11.9651	39.2179	32.7228	26.2422
AAEL001501	Stress	CaspaseSig	IAP	IAP	high	-	CIAPIN1		35.404	49.8435	24.4055	32.8154	87.8299	100	81.1735		28.7387	40.4598	19.8108	26.6374	71.2947	81.1735
AAEL012446	Stress	CaspaseSig	IAP	IAP	high	IAP6	Bruce		48.4634	29.338	24.28	23.8181	33.2418	100	121.931		59.092	35.7722	29.6049	29.0418	40.5322	121.931
AAEL006633	Stress	CaspaseSig	IAP	IAP	high	IAP2	Diap2		39.5696	14.6877	13.0215	13.7385	24.9097	100	33.2022		13.138	4.87665	4.32341	4.56148	8.27057	33.2022
AAEL014251	Stress	CaspaseSig	IAP	IAP	high	IAP5	Det		1.83927	1.54501	1.25466	0.488576	1.87818	100	48.7646		0.896913	0.75342	0.61183	0.238253	0.915889	48.7646
AAEL014196	Stress	CaspaseSig	IAP ANTAGONIST	anti-IAP	high	-	-		97.4152	54.3856	73.3116	19.5524	33.4142	100	5.57483		5.43073	3.03191	4.087	1.09001	1.86279	5.57483
AAEL004392	Stress	CaspaseSig	IAP ANTAGONIST	anti-IAP	high	IMP	-		72.9211	5.0533	15.1292	2.43232	0	100	23.8253		17.3736	1.20396	3.60457	0.579506	0	23.8253
AAEL013407	Stress	Ox-Stress	CAT	CAT	high	Cat	Cat		33.556	35.3867	37.8773	57.2087	100	35.6968	222.124		74.5359	78.6023	84.1347	127.074	222.124	79.2913
AAEL023692	Stress	Ox-Stress	GST	GST_other	high	-	GstE11		26.7059	9.67427	3.70504	12.0088	100	2.39342	71.1518		19.0017	6.88342	2.6362	8.54449	71.1518	1.70296
AAEL027003	Stress	Ox-Stress	GST	GST_other	high	-	GstE11		18.2207	1.35371	3.31782	9.36583	100	11.3766	296.722		54.0648	4.01676	9.8447	27.7905	296.722	33.7569
AAEL027519	Stress	Ox-Stress	GST	GST_other	high	-	GstE11		2.96749	1.16243	3.74641	4.53177	100	0.399594	80.4016		2.38591	0.934615	3.01217	3.64362	80.4016	0.32128
AAEL024134	Stress	Ox-Stress	GST	GST_other	high	-	GstE11		2.96749	1.16243	3.74641	4.53177	100	0.399594	80.4016		2.38591	0.934615	3.01217	3.64362	80.4016	0.32128
AAEL025929	Stress	Ox-Stress	GST	GST_other	high	-	GstT1		13.1629	12.4721	22.8529	29.3367	56.6105	100	129.081		16.9907	16.099	29.4986	37.868	73.0732	129.081
AAEL024885	Stress	Ox-Stress	GST	GST_other	high	-	CG10428		14.8511	9.11739	7.43152	9.60179	15.0678	100	180.156		26.7551	16.4256	13.3884	17.2982	27.1456	180.156
AAEL007017	Stress	Ox-Stress	GST	GST_other	high	-	CG10428		12.0869	0	6.40588	7.04672	8.77639	100	8.34775		1.00899	0	0.534747	0.588243	0.732631	8.34775
AAEL026530	Stress	Ox-Stress	GST	GST_other	high	-	GstD1		0	0	0	9.33403	0	100	2.43566		0	0	0	0.227345	0	2.43566
AAEL007026	Stress	Ox-Stress	GST	GST_other	high	-	CG10428		0	0	0	0	0	0	0.153661		0	0	0	0.0363656	0.0786019	0.153661
AAEL025173	Stress	Ox-Stress	GST	GST_other	high	-	GstE11		0	0	0	0	0	0	0.349497		0.349497	0	0.0651143	0	0.342861	0
AAEL020409	Stress	Ox-Stress	GST	GST_other	high	-	GstE11		0	0	0	0	0	0	0.349497		0.349497	0	0.0651143	0	0.342861	0
AAEL022511	Stress	Ox-Stress	GST	GST_other	high	-	GstE11		0	0	0	0	0	0	2.27322e-05		6.97212e-07	9.93352e-08	7.70838e-07	6.04119e-07	2.27322e-05	0
AAEL001054	Stress	Ox-Stress	GST	GSTD	high	GSTD4	-		100	7.86857	1.96062	38.9433	1.82663	1.61725	4.3031		4.3031	0.338593	0.0843674	1.67577	0.0786019	0.0695918
AAEL010582	Stress	Ox-Stress	GST	GSTD	high	GSTD11	GstD1		3.85866	4.2866	10.3183	100	95.163	13.8521	32.0687		1.23742	1.37466	3.30895	32.0687	30.5175	4.4422
AAEL010591	Stress	Ox-Stress	GST	GSTD	high	GSTD6	-		14.1966	36.8032	85.5746	84.3781	100	43.667	8.89208		1.26238	3.27256	7.60936	7.50296	8.89208	3.8829
AAEL001071	Stress	Ox-Stress	GST	GSTD	high	GSTD5	GstD1		14.1788	1.47916	14.6985	36.6166	12.8412	100	5.72273		0.811415	0.0846482	0.841155	2.09547	0.734869	5.72273
AAEL001061	Stress	Ox-Stress	GST	GSTD	high	GSTD1	GstD1		8.38719	7.72816	1.00489	4.72802	7.1945	100	2002.39		167.945	154.748	20.1218	94.6736	144.062	2002.39
AAEL001090	Stress	Ox-Stress	GST	GSTD	high	GSTD7	GstD11		69.8794	1.214	0	0.708291	0.458074	100	22.3585		15.624	0.271431	0	0.158363	0.102418	22.3585
AAEL001059	Stress	Ox-Stress	GST	GSTD	high	GSTD3	-		0	0	0	0	0	0	0.169841		0.169841	0	0	0	0	0
AAEL007955	Stress	Ox-Stress	GST	GSTE	high	GSTE8	GstE14		100	1.48871	1.75806	0.447077	7.06235	66.9105	18.0446		18.0446	0.268632	0.317234	0.0806733	1.27437	12.0737
AAEL007954	Stress	Ox-Stress	GST	GSTE	high	GSTE1	GstE11		100	0.711218	1.97386	0.682187	2.34273	4.5153	12.0987		12.0987	0.0860478	0.238811	0.0825355	0.283439	0.54629
AAEL007946	Stress	Ox-Stress	GST	GSTE	high	GSTE6	GstE11		14.752	14.7251	63.8708	57.8031	100	8.45886	36.3154		5.35724	5.34747	23.195	20.9914	36.3154	3.07187
AAEL007951	Stress	Ox-Stress	GST	GSTE	high	GSTE2	GstE11		26.7059	9.67427	3.70504	12.0088	100	2.39342	71.1518		19.0017	6.88342	2.6362	8.54449	71.1518	1.70296
AAEL007948	Stress	Ox-Stress	GST	GSTE	high	GSTE7	GstE11		2.96749	1.16243	3.74641	4.53177	100	0.399594	80.4016		2.38591	0.934615	3.01217	3.64362	80.4016	0.32128
AAEL007962	Stress	Ox-Stress	GST	GSTE	high	GSTE4	GstE11		19.4502	29.6162	5.41566	14.9782	59.1866	100	271.287		52.7658	80.3448	14.692	40.634	160.565	271.287
AAEL007947	Stress	Ox-Stress	GST	GSTE	high	GSTE3	GstE11		19.6905	21.512	38.9101	7.58445	4.32172	100	104.863		20.648	22.5581	40.8023	7.95328	4.53189	104.863
AAEL007964	Stress	Ox-Stress	GST	GSTE	high	GSTE5	GstE11		0	0	0	0	0	0	0.349497		0.349497	0	0.0651143	0	0.342861	0
AAEL011752	Stress	Ox-Stress	GST	GSTI	high	GSTI1	gfzf		56.5445	85.3443	84.2357	32.6482	73.0993	100	6.05535		3.42396	5.16789	5.10077	1.97696	4.42642	6.05535
AAEL017085	Stress	Ox-Stress	GST	GSTO	high	GSTO1	GstO1		84.7321	44.2888	75.3881	54.9245	100	91.8259	18.4681		15.6484	8.17931	13.9228	10.1435	18.4681	16.9585
AAEL011741	Stress	Ox-Stress	GST	GSTS	high	GSTS1	GstS1		14.3316	100	0.677815	15.5103	6.44729	2.50525	887.439		127.184	887.439	6.0152	137.645	57.2158	22.2326
AAEL004229	Stress	Ox-Stress	GST	GSTT	high	GSTT4	GstT4		100	62.4243	51.693	17.771	14.0496	16.712	70.3963		70.3963	43.9444	36.39	12.5102	9.8904	11.7646
AAEL009017	Stress	Ox-Stress	GST	GSTT	high	GSTT1	GstT1		32.7151	25.5145	47.2634	48.94	100	87.9854	52.2701		17.1002	13.3365	24.7046	25.581	52.2701	45.99
AAEL009016	Stress	Ox-Stress	GST	GSTT	high	GSTT2	GstT1		21.4131	26.7391	41.9476	35.7637	64.3136	100	12.5502		2.68738	3.3558	5.26448	4.4884	8.07145	12.5502
AAEL010500	Stress	Ox-Stress	GST	GSTX	high	GSTX2	-		100	16.9759	8.17359	13.7558	13.0309	31.3778	23.4113		23.4113	3.97427	1.91355	3.22042	3.05071	7.34596
AAEL000092	Stress	Ox-Stress	GST	GSTX	high	GSTX1	-		0	0	0	100	9.29309	2.88579	77.6898		0	0	0	77.6898	7.21978	2.24196
AAEL011934	Stress	Ox-Stress	GST	GSTZ	high	GSTZ1	GstZ2		68.7708	43.1546	36.3629	25.0369	34.731	100	29.5504		20.322	12.7523	10.7454	7.3985	10.2631	29.5504
AAEL012069	Stress	Ox-Stress	PRDX	GPX	high	GPXH1	PHGPx		100	58.9359	32.0943	66.3417	70.5833	38.1524	92.7468		92.7468	54.6612	29.7665	61.5298	65.4638	35.3851
AAEL008397	Stress	Ox-Stress	PRDX	GPX	high	GPXH2	-		98.9741	100	26.9915	12.4677	45.6026	13.2604	272.139		269.347	272.139	73.4544	33.9295	124.103	36.0868
AAEL000495	Stress	Ox-Stress	PRDX	GPX	high	GPXH3	-		3.82734	0	3.77837	1.99096	0	100	2.07558		0.0794395	0	0.0784231	0.0413241	0	2.07558
AAEL002354	Stress	Ox-Stress	PRDX	HPX	high	HPX5	cysu		100	87.9154	30.4127	5.60052	0	28.9053	1.29306		1.29306	1.1368	0.393255	0.0724181	0	0.373763
AAEL006014	Stress	Ox-Stress	PRDX	HPX	high	HPX1	Pxd		100	48.6397	6.1783	6.37176	0	18.2127	2.63488		2.63488	1.28159	0.16279	0.167888	0	0.479882
AAEL000342	Stress	Ox-Stress	PRDX	HPX	high	-	Pxn		100	17.609	11.0827	9.03312	9.18315	21.0768	26.0414		26.0414	4.58564	2.88609	2.35235	2.39142	5.48871
AAEL011941	Stress	Ox-Stress	PRDX	HPX	high	-	cd		100	0.280951	0.0520525	0.192473	0.491622	0.29076	312.743		312.743	0.878655	0.16279	0.601946	1.53751	0.90933
AAEL020747	Stress	Ox-Stress	PRDX	HPX	high	-	CG10211		56.8587	100	65.1828	60.0153	85.8213	12.1913	13.5666		7.71381	13.5666	8.8431	8.14205	11.6431	1.65395
AAEL017467	Stress	Ox-Stress	PRDX	HPX	high	-	-		23.5763	100	0	0	0	7.64711	3.06755		0.723216	3.06755	0	0	0	0.234579
AAEL019639	Stress	Ox-Stress	PRDX	HPX	high	-	CG42331		0.441153	100	0.109282	0.0702612	0.0425875	0.353833	746.798		3.29452	746.798	0.816114	0.524709	0.318043	2.64242
AAEL013171	Stress	Ox-Stress	PRDX	HPX	high	HPX2	Irc		50.5698	76.6752	100	16.0474	4.00557	28.3137	45.0474		22.7804	34.5402	45.0474	7.22895	1.8044	12.7546
AAEL000496	Stress	Ox-Stress	PRDX	HPX	high	-	-		19.2856	5.50327	4.20158	100	19.0433	5.99412	28.4492		5.48659	1.56564	1.19532	28.4492	5.41766	1.70528
AAEL004386	Stress	Ox-Stress	PRDX	HPX	high	pxt	Pxt		0	0	0.200308	0.0850899	0.0994526	100	505.426		0	0	1.01241	0.430066	0.502659	505.426
AAEL004388	Stress	Ox-Stress	PRDX	HPX	high	HPX8A	Pxt		0.0245664	0	0.0942199	0.0833621	0.036424	100	1059.35		0.260243	0	0.998117	0.883096	0.385857	1059.35
AAEL026038	Stress	Ox-Stress	PRDX	HPX	high	-	Pxt		0.0309761	0	0.161369	0.0442897	0.0344437	100	923.369		0.286024	0	1.49003	0.408957	0.318043	923.369
AAEL004390	Stress	Ox-Stress	PRDX	HPX	high	HPX8B	Pxt		0.0290523	0	0.228332	0.19459	0	100	246.128		0.0715059	0	0.561989	0.47894	0	246.128
AAEL000507	Stress	Ox-Stress	PRDX	HPX	high	-	-		0	0	0	0	0	0	0.234579		0	0	0	0.123224	0	0.234579
AAEL007135	Stress	Ox-Stress	PRDX	TPX	high	-	Prx5		52.238	89.514	100	15.4741	20.6342	19.1311	285.616		149.2	255.666	285.616	44.1965	58.9347	54.6416
AAEL025567	Stress	Ox-Stress	PRDX	TPX	high	-	Jafrac2		81.4228	18.851	53.4756	99.6013	100	81.9197	75.6599		61.6045	14.2627	40.4596	75.3582	75.6599	61.9804
AAEL002309	Stress	Ox-Stress	PRDX	TPX	high	TPX4	Prx2540-1		65.2924	29.5807	8.13657	47.8997	100	2.07393	305.603		199.536	90.3995	24.8656	146.383	305.603	6.33799
AAEL013528	Stress	Ox-Stress	PRDX	TPX	high	TPX1	Prx3		83.2826	52.411	53.0152	33.4312	29.4279	100	100.277		83.5133	52.5562	53.1621	33.5238	29.5094	100.277
AAEL009051	Stress	Ox-Stress	PRDX	TPX	high	TPX5	Prx6005		7.86594	5.54711	10.8003	8.51256	8.73252	100	95.5433		7.51538	5.29989	10.319	8.13318	8.34333	95.5433
AAEL019408	Stress	Ox-Stress	PRDX	TPX	high	-	Jafrac1		25.879	12.0721	10.553	6.94573	1.43175	100	617.492		159.801	74.5443	65.1637	42.8894	8.84093	617.492
AAEL019938	Stress	Ox-Stress	SOD	SODCuZn	high	CUSOD4	-		1.70348	100	7.02894	13.288	22.1506	11.2612	5.3069		0.090402	5.3069	0.373019	0.705183	1.17551	0.597619
AAEL019759	Stress	Ox-Stress	SOD	SODCuZn	high	-	CG5948		34.5436	100	10.1217	0.424355	0.557428	2.1877	107.903		37.2735	107.903	10.9216	0.457891	0.601481	2.36059
AAEL019937	Stress	Ox-Stress	SOD	SODCuZn	high	-	Sod1		38.3825	16.1794	20.7796	24.7245	25.0072	100	685.772		263.216	110.954	142.501	169.554	171.492	685.772
AAEL006271	Stress	Ox-Stress	SOD	SODCuZn	high	CUSOD2	Sod3		14.3411	5.5336	1.47091	0.94232	10.9598	100	364.054		52.2092	20.1453	5.35491	3.43055	39.8995	364.054
AAEL019761	Stress	Ox-Stress	SOD	SODCuZn	high	-	CG5948		0	0	0	0	0	0	0.165861		0.165861	0	0	0	0	0
AAEL025388	Stress	Ox-Stress	SOD	SODMnFe	high	-	Sod2		59.9448	100	23.4781	6.2141	28.7741	30.7595	455.403		272.99	455.403	106.92	28.2992	131.038	140.08
AAEL005108	Stress	Ox-Stress	SOD	SODMnFe	high	MNSOD2	Sod2		0	6.95176	22.7851	2.97779	0	100	1.42892		0	0.0993352	0.325581	0.0425503	0	1.42892
AAEL004823	Stress	Ox-Stress	SOD	SODMnFe	high	MNSOD1	Sod2		0	0	0	0	0	0	0		0	0	0	0	0	0

## Sheet: Gut Regions
Gene ID	SubClass	Superfamily	Family	Subfamily	Confidence	VB Symbol	Dmel Ortholog		Relative Expression					Max TPM		TPM
									Crop	Prov	Ant	Post	Hind			Crop	Prov	Ant	Post	Hind
AAEL020638	Autophagy	AutoPha	APHAG	Aphag_other	high	-	Tor	x	100	92.0269	83.5724	33.186	72.5875	11.9807	x	11.9807	11.0254	10.0125	3.97591	8.69646
AAEL010641	Autophagy	AutoPha	APHAG	Aphag_other	high	APG7A	Uba2	x	74.3168	100	92.9241	46.697	91.8088	20.0574	x	14.906	20.0574	18.6381	9.3662	18.4144
AAEL022443	Autophagy	AutoPha	APHAG	Aphag_other	high	-	Aduk	x	67.7684	69.993	73.0763	43.0309	100	7.22868	x	4.89876	5.05957	5.28245	3.11057	7.22868
AAEL012306	Autophagy	AutoPha	APHAG	Aphag_other	high	APG7B	Uba3	x	45.7005	46.113	76.3018	25.374	100	14.9079	x	6.81299	6.87448	11.375	3.78273	14.9079
AAEL005985	Autophagy	AutoPha	APHAG	Atg	high	-	Atg13	x	100	56.898	51.8739	39.6891	38.5359	381.443	x	381.443	217.033	197.869	151.391	146.992
AAEL009814	Autophagy	AutoPha	APHAG	Atg	high	-	Atg7	x	100	74.4466	87.6139	27.1765	92.9896	7.07614	x	7.07614	5.26794	6.19968	1.92305	6.58007
AAEL018348	Autophagy	AutoPha	APHAG	Atg	high	-	Atg17	x	100	91.4724	80.0477	26.2994	65.121	32.9265	x	32.9265	30.1187	26.3569	8.65948	21.4421
AAEL019779	Autophagy	AutoPha	APHAG	Atg	high	-	Atg16	x	100	80.0811	61.4532	26.6959	43.211	10.0135	x	10.0135	8.01896	6.15364	2.67321	4.32696
AAEL019922	Autophagy	AutoPha	APHAG	Atg	high	-	Atg1	x	100	86.8551	69.5104	29.8407	50.7983	18.6397	x	18.6397	16.1895	12.9565	5.56221	9.46863
AAEL023227	Autophagy	AutoPha	APHAG	Atg	high	-	Atg4a	x	100	73.7459	79.6132	24.1019	42.2278	6.15624	x	6.15624	4.53998	4.90118	1.48377	2.59964
AAEL027731	Autophagy	AutoPha	APHAG	Atg	high	-	Atg14	x	100	47.4329	64.7343	34.5048	38.1932	14.4559	x	14.4559	6.85684	9.35791	4.98797	5.52115
AAEL003777	Autophagy	AutoPha	APHAG	Atg	high	-	Atg2	x	100	47.8532	69.6919	20.2535	33.9604	102.635	x	102.635	49.1142	71.5283	20.7872	34.8552
AAEL009089	Autophagy	AutoPha	APHAG	Atg	high	APG12	Atg12	x	100	66.5925	90.4544	44.6433	75.9694	7.24945	x	7.24945	4.82759	6.55745	3.2364	5.50737
AAEL013995	Autophagy	AutoPha	APHAG	Atg	high	APG18B	Atg18a	x	100	93.261	80.5538	37.8327	89.6094	29.8504	x	29.8504	27.8388	24.0456	11.2932	26.7488
AAEL007162	Autophagy	AutoPha	APHAG	Atg	high	APG8	Atg8a	x	100	67.2042	60.2704	18.1397	74.4518	181.202	x	181.202	121.775	109.211	32.8695	134.908
AAEL009105	Autophagy	AutoPha	APHAG	Atg	high	APG9	Atg9	x	100	61.6018	70.945	35.8693	50.9264	40.3069	x	40.3069	24.8298	28.5958	14.4578	20.5269
AAEL013063	Autophagy	AutoPha	APHAG	Atg	high	APG18A	Atg18b	x	100	50.3647	23.9004	2.72801	30.5987	44.049	x	44.049	22.1852	10.5279	1.20166	13.4784
AAEL021061	Autophagy	AutoPha	APHAG	Atg	high	-	Atg10	x	92.6883	75.7982	100	41.078	62.5096	2.38604	x	2.21158	1.80858	2.38604	0.980139	1.49151
AAEL010427	Autophagy	AutoPha	APHAG	Atg	high	APG6	Atg6	x	82.165	61.0422	69.161	42.7657	100	6.71808	x	5.51991	4.10086	4.64629	2.87303	6.71808
AAEL002286	Autophagy	AutoPha	APHAG	Atg	high	APG5	Atg5	x	96.3833	63.4039	66.8439	37.5612	100	6.09178	x	5.87146	3.86242	4.07198	2.28814	6.09178
AAEL010516	Autophagy	AutoPha	APHAG	Atg	high	APG4A	Atg4b	x	67.179	69.9972	53.2561	28.0467	100	7.73503	x	5.19631	5.4143	4.11938	2.16942	7.73503
AAEL000955	Autophagy	AutoPha	APHAG	Atg	high	APG3	Atg3	x	39.0059	24.3603	37.2221	11.4582	100	55.5971	x	21.6862	13.5436	20.6944	6.37043	55.5971
AAEL007228	Autophagy	AutoPha	APHAG	Atg	high	APG4B	Atg4a	x	0	0	0	0	0	0.74014	x	0.574011	0.74014	0	0.184927	0
AAEL003389	Effector Molecules	AntiMic	AMP	Attacin	high	ATT	AttA	x	3.63578	9.24717	1.45755	4.76248	100	6.41057	x	0.233074	0.592796	0.0934372	0.305302	6.41057
AAEL027281	Effector Molecules	AntiMic	AMP	Attacin	high	-	AttA	x	0	0	0	0	0	0.0581605	x	0.0581605	0	0	0	0
AAEL004833	Effector Molecules	AntiMic	AMP	Attacin	high	DPT1	DptA	x	0	0	0	0	0	0.286734	x	0.286734	0	0	0	0
AAEL024595	Effector Molecules	AntiMic	AMP	Cathelicidin	high	-	Camp	x	100	20.9741	14.226	22.6253	25.2576	1.69011	x	1.69011	0.354485	0.240436	0.382392	0.426881
AAEL012805	Effector Molecules	AntiMic	AMP	Cathelicidin	high	-	Camp	x	0	0	0	0	0	0	x	0	0	0	0	0
AAEL029044	Effector Molecules	AntiMic	AMP	Cecropin	high	CECE	-	x	82.7738	100	21.8388	6.81389	56.6111	3.45303	x	2.8582	3.45303	0.7541	0.235286	1.9548
AAEL029047	Effector Molecules	AntiMic	AMP	Cecropin	high	CECN	-	x	30.5661	100	86.4887	26.951	75.5692	26.4485	x	8.08427	26.4485	22.875	7.12814	19.9869
AAEL029041	Effector Molecules	AntiMic	AMP	Cecropin	high	-	-	x	15.9134	67.4846	100	34.9224	7.20083	20.3338	x	3.23579	13.7222	20.3338	7.10104	1.4642
AAEL029046	Effector Molecules	AntiMic	AMP	Cecropin	high	CECD	-	x	10.9418	35.2931	15.836	9.55218	100	16.0733	x	1.75872	5.67276	2.54537	1.53535	16.0733
AAEL029038	Effector Molecules	AntiMic	AMP	Cecropin	high	CECA	-	x	10.7438	50.3954	23.6606	5.4556	100	29.373	x	3.15578	14.8026	6.94982	1.60247	29.373
AAEL003832	Effector Molecules	AntiMic	AMP	Defensin	high	DEFC	Def	x	100	97.3317	8.55028	2.86605	35.4166	91.1224	x	91.1224	88.6909	7.79122	2.61161	32.2724
AAEL003857	Effector Molecules	AntiMic	AMP	Defensin	high	DEFD	Def	x	64.8023	100	25.4853	5.5165	9.03249	108.29	x	70.1746	108.29	27.5981	5.97383	9.78132
AAEL003841	Effector Molecules	AntiMic	AMP	Defensin	high	DEFA	Def	x	12.3207	100	18.1869	0.25314	2.22403	388	x	47.7908	388.25	70.5451	0.981907	8.62681
AAEL004522	Effector Molecules	AntiMic	AMP	Gambicin	high	GAM1	-	x	3.35513	100	74.8801	0.108398	1.54994	31061.8	x	1042.16	31061.8	23259.1	33.6705	481.439
AAEL017536	Effector Molecules	AntiMic	AMP	Holotricin	high	GRRP	-	x	100	20.5845	26.5352	0.939999	19.0508	42.4241	x	42.4241	8.73277	11.2573	0.398786	8.08214
AAEL017132	Effector Molecules	AntiMic	LYS	LYSC	high	LYSC4	CG11159	x	36.0848	100	24.6289	2.33663	29.0949	112.185	x	40.4818	112.185	27.63	2.62135	32.6401
AAEL015404	Effector Molecules	AntiMic	LYS	LYSC	high	LYSC7B	CG11159	x	3.10842	100	3.69915	0.515106	0.936039	5040.03	x	156.665	5040.03	186.439	25.9615	47.1767
AAEL003723	Effector Molecules	AntiMic	LYS	LYSC	high	LYSC11	-	x	4.95611	74.5633	100	15.5752	27.7374	123.611	x	6.1263	92.1685	123.611	19.2526	34.2865
AAEL003712	Effector Molecules	AntiMic	LYS	LYSC	high	LYSC10	-	x	0	0	0	0	0	0.475287	x	0.0930117	0.361706	0.475287	0.25168	0.364451
AAEL025888	Effector Molecules	AntiMic	LYS	LYSI	high	-	CG6421	x	100	10.7137	0.737686	0.382229	8.48637	61.5562	x	61.5562	6.59493	0.454091	0.235286	5.22389
AAEL001485	Effector Molecules	AntiMic	LYS	LYSI	high	-	CG14823	x	100	32.1236	4.0245	2.40312	2.7818	2.98715	x	2.98715	0.959581	0.120218	0.0717849	0.0830965
AAEL019435	Effector Molecules	AntiMic	LYS	LYSlong	high	LYSC6	CG8492	x	100	20.2979	0	1.12593	5.23955	6.53267	x	6.53267	1.32599	0	0.0735532	0.342282
AAEL009745	Effector Molecules	EffEnzy	NO	NOS	high	-	Nos	x	11.6478	86.8192	100	10.7834	17.3812	1.49983	x	0.174698	1.30214	1.49983	0.161732	0.260688
AAEL015116	Effector Molecules	EffEnzy	PPO	PPO	high	-	PPO1	x	88.3373	100	26.1844	4.19632	32.4769	1.71066	x	1.51115	1.71066	0.447927	0.0717849	0.555571
AAEL011763	Effector Molecules	EffEnzy	PPO	PPO	high	PPO3	PPO1	x	72.9822	100	0	6.18635	19.4973	1.45397	x	1.06114	1.45397	0	0.0899474	0.283485
AAEL013492	Effector Molecules	EffEnzy	PPO	PPO	high	PPO5	PPO1	x	91.8231	71.8399	66.7265	22.3298	100	6.22493	x	5.71592	4.47198	4.15368	1.39001	6.22493
AAEL015113	Effector Molecules	EffEnzy	PPO	PPO	high	-	PPO1	x	0	0	0	0	0	0.232349	x	0.162935	0.232349	0.213655	0	0
AAEL020579	Effector Molecules	EffEnzy	PPO	PPO	high	-	PPO1	x	0	0	0	0	0	0.244274	x	0.148991	0.244274	0	0	0
AAEL011764	Effector Molecules	EffEnzy	PPO	PPO	high	PPO10	PPO1	x	0	0	0	0	0	0.598759	x	0.402649	0.598759	0.228107	0.0717849	0.0929924
AAEL013501	Effector Molecules	EffEnzy	PPO	PPO	high	PPO4	PPO1	x	0	0	0	0	0	0.388921	x	0.388921	0.360448	0.333873	0.163501	0.0830965
AAEL014544	Effector Molecules	EffEnzy	PPO	PPO	high	PPO6	PPO2	x	0	0	0	0	0	0.20726	x	0.20726	0.122137	0.120218	0	0
AAEL013493	Effector Molecules	EffEnzy	PPO	PPO	high	PPO7	PPO1	x	0	0	0	0	0	0.122137	x	0.0581605	0.122137	0	0	0
AAEL013496	Effector Molecules	EffEnzy	PPO	PPO	high	PPO8	PPO1	x	0	0	0	0	0	0.84912	x	0.197786	0.84912	0	0	0
AAEL007563	Effector Molecules	EffEnzy	PRDX	DUOX	high	DUOX	Duox	x	100	3.40465	0.382653	0	5.75318	24.4183	x	24.4183	0.831357	0.0934372	0	1.40483
AAEL002039	Effector Molecules	EffEnzy	PRDX	NOX	high	-	Nox	x	0	0	0	0	0	0.720261	x	0.174482	0	0	0.0735532	0.720261
AAEL027984	Modulation	CascMod	CLIP	atypicalCLIP	low	-	-	x	7.19527	100	6.8232	2.92078	2.06713	13.7139	x	0.986754	13.7139	0.935729	0.400554	0.283485
AAEL019768	Modulation	CascMod	CLIP	CLIP_other	high	-	CG11313	x	100	5.766	0	0	31.7278	6.25343	x	6.25343	0.360573	0	0	1.98407
AAEL002632	Modulation	CascMod	CLIP	CLIP_other	high	-	-	x	100	10.4386	1.16668	0	1.8195	10.3043	x	10.3043	1.07563	0.120218	0	0.187487
AAEL002593	Modulation	CascMod	CLIP	CLIP_other	high	-	CG40160	x	100	28.3652	0.744929	0.163178	57.0411	87.9838	x	87.9838	24.9568	0.655417	0.14357	50.1869
AAEL002595	Modulation	CascMod	CLIP	CLIP_other	high	-	CG5390	x	100	21.3214	0.762213	0.075312	62.4265	192.981	x	192.981	41.1463	1.47093	0.145338	120.471
AAEL002629	Modulation	CascMod	CLIP	CLIP_other	high	-	CG5390	x	100	22.8611	1.00628	0.315945	45.9413	51.7496	x	51.7496	11.8305	0.520748	0.163501	23.7745
AAEL018159	Modulation	CascMod	CLIP	CLIP_other	high	-	scaf	x	100	2.28247	0.196435	0.051544	8.02572	142.7	x	142.7	3.25708	0.280312	0.0735532	11.4527
AAEL024669	Modulation	CascMod	CLIP	CLIP_other	high	-	-	x	100	28.3377	13.1572	0.935224	73.3963	7.67569	x	7.67569	2.17511	1.00991	0.0717849	5.63368
AAEL015637	Modulation	CascMod	CLIP	CLIP_other	high	-	Sp7	x	100	15.3466	0	0	0	9.43696	x	9.43696	1.44825	0	0	0
AAEL019781	Modulation	CascMod	CLIP	CLIP_other	high	-	-	x	100	20.1541	55.615	25.8398	82.5741	7.15754	x	7.15754	1.44254	3.98067	1.8495	5.91027
AAEL019767	Modulation	CascMod	CLIP	CLIP_other	high	-	Sp7	x	100	17.8425	0.815385	0.0981964	43.2955	385.814	x	385.814	68.8387	3.14587	0.378855	167.04
AAEL003279	Modulation	CascMod	CLIP	CLIP_other	high	-	grass	x	100	48.0719	12.4255	1.36091	86.1141	5.27478	x	5.27478	2.53568	0.655417	0.0717849	4.54233
AAEL002288	Modulation	CascMod	CLIP	CLIP_other	high	-	-	x	100	33.3257	0	16.1751	20.9496	1.79706	x	1.79706	0.598884	0	0.290676	0.376477
AAEL015465	Modulation	CascMod	CLIP	CLIP_other	high	-	CG9737	x	38.9406	100	4.63449	0	85.2234	9.53205	x	3.71184	9.53205	0.441762	0	8.12354
AAEL017003	Modulation	CascMod	CLIP	CLIP_other	high	-	grass	x	68.7363	31.8675	16.2983	5.2216	100	4.50601	x	3.09726	1.43595	0.734403	0.235286	4.50601
AAEL022578	Modulation	CascMod	CLIP	CLIP_other	high	-	CG9737	x	34.7452	22.1729	5.32159	0.205785	100	150.078	x	52.145	33.2767	7.98655	0.308839	150.078
AAEL002600	Modulation	CascMod	CLIP	CLIP_other	high	-	CG5390	x	82.5623	59.3847	3.04132	0.0695287	100	105.788	x	87.3412	62.822	3.21736	0.0735532	105.788
AAEL019853	Modulation	CascMod	CLIP	CLIP_other	high	-	Hayan	x	69.6636	27.6404	10.8057	0	100	10.4586	x	7.28583	2.89079	1.13012	0	10.4586
AAEL002128	Modulation	CascMod	CLIP	CLIP_other	high	-	CG32260	x	0	0	0	0	0	0.621779	x	0.621779	0.116174	0.114053	0.0735532	0.0944949
AAEL002577	Modulation	CascMod	CLIP	CLIP_other	high	-	-	x	0	0	0	0	0	0.122137	x	0.116537	0.122137	0	0	0
AAEL026876	Modulation	CascMod	CLIP	CLIP_other	high	-	Hayan	x	0	0	0	0	0	0.567108	x	0	0.567108	0	0	0
AAEL026937	Modulation	CascMod	CLIP	CLIP_other	high	-	-	x	0	0	0	0	0	0.163043	x	0.163043	0	0.114053	0	0.0944949
AAEL025028	Modulation	CascMod	CLIP	CLIP_other	high	-	grass	x	0	0	0	0	0	0.877359	x	0.23993	0.72127	0.877359	0.290676	0.740053
AAEL002590	Modulation	CascMod	CLIP	CLIPA	high	-	-	x	100	15.7685	1.49561	0.671741	35.025	26.7804	x	26.7804	4.22287	0.40053	0.179895	9.37984
AAEL022775	Modulation	CascMod	CLIP	CLIPA	high	-	CG9377	x	100	0	0	0	0	2.5812	x	2.5812	0	0	0	0
AAEL002301	Modulation	CascMod	CLIP	CLIPA	high	-	-	x	100	33.0076	27.9915	3.21192	25.4817	5.09043	x	5.09043	1.68023	1.42489	0.163501	1.29713
AAEL008404	Modulation	CascMod	CLIP	CLIPA	high	CLIPA16	CG9377	x	100	0	1.83269	4.97116	21.7819	5.09837	x	5.09837	0	0.0934372	0.253448	1.11052
AAEL007006	Modulation	CascMod	CLIP	CLIPA	high	CLIPA17	-	x	100	59.5032	40.4098	15.7491	27.4587	1.02693	x	1.02693	0.611058	0.414981	0.161732	0.281982
AAEL002624	Modulation	CascMod	CLIP	CLIPA	high	-	-	x	100	36.9333	35.1873	6.96999	14.6447	1.2905	x	1.2905	0.476622	0.454091	0.0899474	0.18899
AAEL002601	Modulation	CascMod	CLIP	CLIPA	high	CLIPA1	CG9377	x	96.459	91.8497	9.05049	5.30178	100	3.3931	x	3.27295	3.11656	0.307092	0.179895	3.3931
AAEL002580	Modulation	CascMod	CLIP	CLIPA	high	-	CG9377	x	43.6157	25.0375	3.67157	4.08705	100	11.4704	x	5.00291	2.87191	0.421146	0.468803	11.4704
AAEL020706	Modulation	CascMod	CLIP	CLIPA	high	-	CG9377	x	66.4066	20.26	4.31451	0	100	7.11767	x	4.7266	1.44204	0.307092	0	7.11767
AAEL001675	Modulation	CascMod	CLIP	CLIPA	high	CLIPA10	CG4998	x	0	0	0	0	0	0.944949	x	0.232966	0	0	0.0717849	0.944949
AAEL002126	Modulation	CascMod	CLIP	CLIPA	high	CLIPA15	mas	x	0	0	0	0	0	0.278977	x	0.163043	0.116174	0	0	0.278977
AAEL005718	Modulation	CascMod	CLIP	CLIPA	high	CLIPA3	CG13318	x	0	0	0	0	0	0.177591	x	0.116321	0	0.120218	0	0.177591
AAEL001084	Modulation	CascMod	CLIP	CLIPB	high	CLIPB21	-	x	100	62.2446	1.61593	0.777789	79.2649	11.5645	x	11.5645	7.19828	0.186874	0.0899474	9.16659
AAEL007992	Modulation	CascMod	CLIP	CLIPB	high	-	-	x	100	25.794	7.27993	18.074	31.6899	11.6547	x	11.6547	3.00622	0.848456	2.10648	3.69338
AAEL015430	Modulation	CascMod	CLIP	CLIPB	high	CLIPB19	-	x	100	41.3729	11.3536	0	22.7248	2.00912	x	2.00912	0.831232	0.228107	0	0.456569
AAEL008668	Modulation	CascMod	CLIP	CLIPB	high	CLIPB22	-	x	100	1.55556	2.98373	15.3612	25.3079	7.85163	x	7.85163	0.122137	0.234271	1.2061	1.98708
AAEL014137	Modulation	CascMod	CLIP	CLIPB	high	CLIPB25	-	x	100	5.60563	0	0	5.82906	12.9688	x	12.9688	0.726983	0	0	0.755959
AAEL007993	Modulation	CascMod	CLIP	CLIPB	high	CLIPB27	-	x	100	36.9803	38.4276	16.8304	84.7764	297.031	x	297.031	109.843	114.142	49.9914	251.812
AAEL006674	Modulation	CascMod	CLIP	CLIPB	high	CLIPB29	-	x	100	23.6594	15.0072	3.1972	8.24883	4.54579	x	4.54579	1.07551	0.682198	0.145338	0.374975
AAEL000099	Modulation	CascMod	CLIP	CLIPB	high	CLIPB33	-	x	100	70.4548	0	0	15.7921	1.19674	x	1.19674	0.843157	0	0	0.18899
AAEL000037	Modulation	CascMod	CLIP	CLIPB	high	CLIPB35	-	x	100	35.1344	15.3355	3.09783	67.0504	4.7487	x	4.7487	1.66843	0.728238	0.147106	3.18402
AAEL005064	Modulation	CascMod	CLIP	CLIPB	high	CLIPB5	CG3505	x	100	13.537	0.940162	0.0168826	59.3422	435.675	x	435.675	58.9773	4.09605	0.0735532	258.539
AAEL000760	Modulation	CascMod	CLIP	CLIPB	high	CLIPB30	-	x	8.69398	100	98.4051	0	2.63375	3.58784	x	0.311926	3.58784	3.53062	0	0.0944949
AAEL005093	Modulation	CascMod	CLIP	CLIPB	high	CLIPB46	-	x	8.11121	100	19.9164	1.0585	10.0407	29.01	x	2.35306	29.01	5.77774	0.30707	2.91281
AAEL014349	Modulation	CascMod	CLIP	CLIPB	high	CLIPB15	-	x	71.9201	45.7366	100	33.9055	34.9006	3.16651	x	2.27736	1.44825	3.16651	1.07362	1.10513
AAEL006161	Modulation	CascMod	CLIP	CLIPB	high	CLIPB31	-	x	22.7401	0	100	11.3465	8.74188	3.22565	x	0.733517	0	3.22565	0.365998	0.281982
AAEL000038	Modulation	CascMod	CLIP	CLIPB	high	CLIPB6	-	x	33.062	23.1046	26.19	10.7204	100	186.904	x	61.7942	43.1835	48.9503	20.037	186.904
AAEL000074	Modulation	CascMod	CLIP	CLIPB	high	CLIPB1	ea	x	61.4411	18.8803	2.0558	0.917602	100	57.5118	x	35.3359	10.8584	1.18233	0.52773	57.5118
AAEL003243	Modulation	CascMod	CLIP	CLIPB	high	CLIPB13A	grass	x	16.9883	8.47579	1.52608	0.617044	100	35.4742	x	6.02645	3.00672	0.541364	0.218891	35.4742
AAEL014354	Modulation	CascMod	CLIP	CLIPB	high	CLIPB43	-	x	71.1161	14.5789	1.97256	0.474721	100	18.9474	x	13.4747	2.76232	0.373749	0.0899474	18.9474
AAEL000028	Modulation	CascMod	CLIP	CLIPB	high	CLIPB34	-	x	81.2113	42.7468	1.80458	0.386407	100	284.045	x	230.676	121.42	5.1258	1.09757	284.045
AAEL001077	Modulation	CascMod	CLIP	CLIPB	high	CLIPB45	-	x	44.51	25.0768	0.693039	0.202092	100	1117.12	x	497.228	280.137	7.74205	2.2576	1117.12
AAEL003628	Modulation	CascMod	CLIP	CLIPB	high	CLIPB38	-	x	67.1419	61.0224	2.77732	0	100	3.3643	x	2.25885	2.05297	0.0934372	0	3.3643
AAEL013245	Modulation	CascMod	CLIP	CLIPB	high	CLIPB28	-	x	8.49662	3.74762	0.971142	0	100	9.62137	x	0.817492	0.360573	0.0934372	0	9.62137
AAEL003632	Modulation	CascMod	CLIP	CLIPB	high	CLIPB39	CG9737	x	63.8666	56.7931	0	0	100	3.3685	x	2.15135	1.91307	0	0	3.3685
AAEL003253	Modulation	CascMod	CLIP	CLIPB	high	CLIPB13B	grass	x	0	0	0	0	0	0.286436	x	0.286436	0.122137	0	0	0
AAEL005648	Modulation	CascMod	CLIP	CLIPB	high	CLIPB16	CG17572	x	0	0	0	0	0	0.48204	x	0.48204	0.238436	0	0.14357	0.0830965
AAEL005431	Modulation	CascMod	CLIP	CLIPB	high	CLIPB37	-	x	0	0	0	0	0	0.556871	x	0.556871	0.488797	0.207491	0.145338	0.0929924
AAEL003631	Modulation	CascMod	CLIP	CLIPB	high	CLIPB41	CG9737	x	0	0	0	0	0	0	x	0	0	0	0	0
AAEL006168	Modulation	CascMod	CLIP	CLIPB	high	CLIPB42	-	x	0	0	0	0	0	0.482834	x	0.414519	0.482834	0.0934372	0	0.18899
AAEL005060	Modulation	CascMod	CLIP	CLIPB	high	CLIPB44	CG34409	x	0	0	0	0	0	0.232349	x	0.116321	0.232349	0	0	0.0830965
AAEL014139	Modulation	CascMod	CLIP	CLIPB	high	-	-	x	0	0	0	0	0	0.844835	x	0.844835	0	0	0	0.365079
AAEL012712	Modulation	CascMod	CLIP	CLIPC	high	CLIPC13	Hayan	x	100	68.6489	67.5783	63.8263	75.2786	6.24109	x	6.24109	4.28444	4.21762	3.98346	4.69821
AAEL012713	Modulation	CascMod	CLIP	CLIPC	high	CLIPC16	Hayan	x	100	15.762	2.31073	0.54954	60.9877	295.921	x	295.921	46.6429	6.83793	1.6262	180.475
AAEL004524	Modulation	CascMod	CLIP	CLIPC	high	CLIPC5B	Hayan	x	63.5095	17.6962	2.62422	1.57481	100	25.2106	x	16.0111	4.46131	0.661582	0.397018	25.2106
AAEL007597	Modulation	CascMod	CLIP	CLIPC	high	CLIPC3	snk	x	62.0166	14.0177	2.70866	0.754724	100	146.832	x	91.0605	20.5826	3.97719	1.10818	146.832
AAEL011991	Modulation	CascMod	CLIP	CLIPC	high	CLIPC1	snk	x	9.25557	9.69752	3.78183	0.194849	100	74.5901	x	6.90374	7.23339	2.82087	0.145338	74.5901
AAEL007593	Modulation	CascMod	CLIP	CLIPC	high	CLIPC2	snk	x	19.0906	5.53254	1.12077	0.100656	100	538.823	x	102.864	29.8106	6.03897	0.542356	538.823
AAEL011593	Modulation	CascMod	CLIP	CLIPC	high	CLIPC11	snk	x	0	0	0	0	0	0.116174	x	0.0581605	0.116174	0	0	0.0929924
AAEL012711	Modulation	CascMod	CLIP	CLIPC	high	CLIPC12	-	x	0	0	0	0	0	0.565691	x	0.565691	0.482834	0.228107	0.161732	0
AAEL014350	Modulation	CascMod	CLIP	CLIPC	high	-	-	x	0	0	0	0	0	0.472896	x	0.472896	0.244398	0.240436	0	0
AAEL004979	Modulation	CascMod	CLIP	CLIPD	high	CLIPD2	l(2)k05911	x	100	12.9997	1.35692	1.40149	1.21703	68.4488	x	68.4488	8.89814	0.928798	0.959305	0.833046
AAEL000238	Modulation	CascMod	CLIP	CLIPD	high	CLIPD9	CG8172	x	100	0	0	0	11.3636	3.21271	x	3.21271	0	0	0	0.365079
AAEL015109	Modulation	CascMod	CLIP	CLIPD	high	CLIPD10	CG8170	x	32.2288	100	0	0	5.50078	19.4961	x	6.28338	19.4961	0	0	1.07244
AAEL019590	Modulation	CascMod	CLIP	CLIPD	high	-	-	x	37.887	3.42413	1.37699	5.66138	100	6.78563	x	2.57087	0.232349	0.0934372	0.38416	6.78563
AAEL002124	Modulation	CascMod	CLIP	CLIPD	high	CLIPD6	CG7432	x	84.98	10.6365	1.08375	0.0122009	100	588.357	x	499.986	62.5809	6.37629	0.0717849	588.357
AAEL025309	Modulation	CascMod	CLIP	CLIPD	high	-	-	x	0	0	0	0	0	0.37798	x	0.265636	0.35461	0	0.0735532	0.37798
AAEL007796	Modulation	CascMod	CLIP	CLIPD	high	CLIPD1	CG9372	x	0	0	0	0	0	0.488913	x	0.488913	0.366535	0.186874	0.0717849	0.187487
AAEL011375	Modulation	CascMod	CLIP	CLIPD	high	-	-	x	0	0	0	0	0	0	x	0	0	0	0	0
AAEL002997	Modulation	CascMod	CLIP	CLIPD	high	CLIPD3	CG7432	x	0	0	0	0	0	0.73332	x	0.0908306	0.73332	0	0	0.0929924
AAEL000224	Modulation	CascMod	CLIP	CLIPD	high	-	CG13744	x	0	0	0	0	0	0.0944949	x	0	0	0	0	0.0944949
AAEL005906	Modulation	CascMod	CLIP	CLIPD	high	-	Sb	x	0	0	0	0	0	0.116174	x	0	0.116174	0	0	0
AAEL018347	Modulation	CascMod	CLIP	CLIPE	high	CLIPE12	-	x	60.6245	66.4539	43.464	27.0944	100	2.15527	x	1.30662	1.43226	0.936765	0.583955	2.15527
AAEL001233	Modulation	CascMod	CLIP	CLIPE	high	CLIPE9	-	x	29.0929	20.9973	0.440367	0.33832	100	21.218	x	6.17294	4.45522	0.0934372	0.0717849	21.218
AAEL005792	Modulation	CascMod	CLIP	CLIPE	high	CLIPE8	-	x	11.8276	3.32137	3.77965	0.218169	100	166.138	x	19.6502	5.51805	6.27943	0.362461	166.138
AAEL014825	Modulation	CascMod	DREP	DREP	high	-	Drep1	x	100	27.4211	17.4494	4.17938	26.5905	1.7599	x	1.7599	0.482585	0.307092	0.0735532	0.467967
AAEL004995	Modulation	CascMod	DREP	DREP	high	-	Drep4	x	82.3996	86.3855	100	65.393	64.7553	4.04656	x	3.33435	3.49564	4.04656	2.64616	2.62036
AAEL006265	Modulation	CascMod	DREP	DREP	high	-	Drep2	x	0	0	0	0	0	0.959332	x	0.612197	0.959332	0.240436	0	0
AAEL023229	Modulation	CascMod	initiator SP	ModSP	high	-	modSP	x	100	43.1	18.7364	2.79208	48.4305	5.85587	x	5.85587	2.52388	1.09718	0.163501	2.83603
AAEL005665	Modulation	CascMod	SRPN	SRPN	high	SRPN3	-	x	100	24.7721	0	0.799768	20.2555	11.2467	x	11.2467	2.78604	0	0.0899474	2.27808
AAEL014078	Modulation	CascMod	SRPN	SRPN	high	-	Spn27A	x	100	21.1713	1.36007	0.0710277	22.3065	253.274	x	253.274	53.6215	3.4447	0.179895	56.4966
AAEL014079	Modulation	CascMod	SRPN	SRPN	high	-	Spn27A	x	100	12.4014	1.07703	1.0368	41.8985	8.67545	x	8.67545	1.07588	0.0934372	0.0899474	3.63488
AAEL020823	Modulation	CascMod	SRPN	SRPN	high	-	-	x	100	21.8148	2.43813	0.607825	74.9557	134.354	x	134.354	29.3091	3.27573	0.816638	100.706
AAEL027145	Modulation	CascMod	SRPN	SRPN	high	-	CG43366	x	100	30.3018	4.38355	0	1.18919	7.94617	x	7.94617	2.40783	0.348325	0	0.0944949
AAEL028034	Modulation	CascMod	SRPN	SRPN	high	-	Spn77Ba	x	100	19.9519	8.01735	3.24575	86.5223	55.1944	x	55.1944	11.0123	4.42513	1.79147	47.7555
AAEL014138	Modulation	CascMod	SRPN	SRPN	high	SRPN16	Spn28Dc	x	100	20.5946	3.14822	1.31404	54.5581	67.5413	x	67.5413	13.9099	2.12634	0.88752	36.8492
AAEL003697	Modulation	CascMod	SRPN	SRPN	high	SRPN17	-	x	100	27.6313	1.62025	0.503242	73.4436	86.2896	x	86.2896	23.843	1.39811	0.434246	63.3742
AAEL006137	Modulation	CascMod	SRPN	SRPN	high	SRPN19	Spn85F	x	100	50.617	18.0941	0	5.23293	1.77706	x	1.77706	0.899497	0.321544	0	0.0929924
AAEL002704	Modulation	CascMod	SRPN	SRPN	high	SRPN23	-	x	100	0	0	0	1.11337	8.48725	x	8.48725	0	0	0	0.0944949
AAEL007420	Modulation	CascMod	SRPN	SRPN	high	SRPN25	-	x	100	81.8504	73.564	28.6969	35.4108	9.10092	x	9.10092	7.44914	6.695	2.61169	3.22271
AAEL003182	Modulation	CascMod	SRPN	SRPN	high	SRPN26	-	x	100	6.75083	0	0	10.1258	3.62027	x	3.62027	0.244398	0	0	0.366581
AAEL013936	Modulation	CascMod	SRPN	SRPN	high	SRPN4	Spn28Dc	x	100	28.8448	3.07112	1.13212	98.8278	89.2355	x	89.2355	25.7398	2.74053	1.01026	88.1895
AAEL011777	Modulation	CascMod	SRPN	SRPN	high	SRPN8	Spn77Ba	x	100	19.9519	8.01735	3.24575	86.5223	55.1944	x	55.1944	11.0123	4.42513	1.79147	47.7555
AAEL010769	Modulation	CascMod	SRPN	SRPN	high	SRPN6	Spn28Dc	x	74.6544	100	1.62041	0.696328	79.8087	33.7895	x	25.2253	33.7895	0.547528	0.235286	26.9669
AAEL014141	Modulation	CascMod	SRPN	SRPN	high	SRPN5	Spn28Dc	x	19.282	100	2.06771	0.264817	3.03488	27.7751	x	5.35559	27.7751	0.574309	0.0735532	0.842942
AAEL007765	Modulation	CascMod	SRPN	SRPN	high	SRPN10	Spn55B	x	91.4347	89.1039	100	59.748	52.2153	141.977	x	129.816	126.507	141.977	84.8286	74.1338
AAEL008364	Modulation	CascMod	SRPN	SRPN	high	SRPN9	Spn88Ea	x	40.8217	12.1093	1.93275	0.274509	100	190.957	x	77.9518	23.1235	3.69071	0.524193	190.957
AAEL002720	Modulation	CascMod	SRPN	SRPN	high	SRPN20	-	x	56.6537	2.49215	1.60996	0.268828	100	87.5226	x	49.5848	2.1812	1.40908	0.235286	87.5226
AAEL002699	Modulation	CascMod	SRPN	SRPN	high	SRPN7	-	x	0	0	0	0	100	1.67691	x	0	0	0	0	1.67691
AAEL024006	Modulation	CascMod	SRPN	SRPN	high	-	-	x	0	0	0	0	0	0	x	0	0	0	0	0
AAEL003653	Modulation	CascMod	SRPN	SRPN	high	SRPN12	Spn100A	x	0	0	0	0	0	0.279256	x	0.279256	0	0	0	0
AAEL002731	Modulation	CascMod	SRPN	SRPN	high	SRPN14	-	x	0	0	0	0	0	0.558836	x	0.558836	0.116174	0	0.0735532	0.272086
AAEL002730	Modulation	CascMod	SRPN	SRPN	high	SRPN21	-	x	0	0	0	0	0	0.366535	x	0.358648	0.366535	0	0.0735532	0.177591
AAEL017249	Modulation	CascMod	SRPN	SRPN	high	SRPN24	Spn42Da	x	0	0	0	0	0	0	x	0	0	0	0	0
AAEL009850	Recognition	ClasRec	GALE	GALE	high	GALE14	-	x	54.0573	100	32.1079	16.997	54.3889	33.9159	x	18.3341	33.9159	10.8897	5.76471	18.4465
AAEL012003	Recognition	ClasRec	GALE	GALE	high	GALE6B	-	x	89.2911	100	68.3307	11.0423	94.4619	1.3322	x	1.18954	1.3322	0.910305	0.147106	1.25842
AAEL004196	Recognition	ClasRec	GALE	GALE	high	GALE3	Pex23	x	43.2791	74.6176	100	29.0466	31.9418	14.5606	x	6.30168	10.8648	14.5606	4.22935	4.65091
AAEL009842	Recognition	ClasRec	GALE	GALE	high	GALE12	-	x	15.1289	69.819	100	92.3334	24.9817	61.6579	x	9.32815	43.0489	61.6579	56.9309	15.4032
AAEL003844	Recognition	ClasRec	GALE	GALE	high	GALE5	-	x	57.8668	63.2475	100	44.6471	34.4367	212.825	x	123.155	134.607	212.825	95.0204	73.29
AAEL003541	Recognition	ClasRec	GALE	GALE	high	GALE1	galectin	x	16.9381	54.3392	100	36.7606	43.2589	64.4734	x	10.9206	35.0343	64.4734	23.7008	27.8905
AAEL012135	Recognition	ClasRec	GALE	GALE	high	GALE2	CG5335	x	3.03303	57.6819	100	27.2008	5.10417	195.041	x	5.91565	112.503	195.041	53.0527	9.95523
AAEL005293	Recognition	ClasRec	GALE	GALE	high	GALE8A	-	x	5.64655	76.927	96.4582	100	9.13996	291.394	x	16.4537	224.16	281.073	291.394	26.6333
AAEL026564	Recognition	ClasRec	GALE	GALE	high	-	galectin	x	45.0257	35.5272	0	100	28.438	7.24705	x	3.26303	2.57467	0	7.24705	2.06091
AAEL003840	Recognition	ClasRec	GALE	GALE	high	GALE11	-	x	0	0	0	0	0	0	x	0	0	0	0	0
AAEL007626	Recognition	ClasRec	GNBP	GNBPA	high	GNBPA1	GNBP1	x	100	23.1227	1.47241	0	82.9726	14.5106	x	14.5106	3.35524	0.213655	0	12.0398
AAEL000652	Recognition	ClasRec	GNBP	GNBPA	high	GNBPA2	GNBP1	x	0	0	0	0	0	0.122137	x	0	0.122137	0	0	0
AAEL003889	Recognition	ClasRec	GNBP	GNBPB	high	GNBPB1	-	x	100	91.9608	18.5291	16.9023	98.7744	23.0065	x	23.0065	21.157	4.2629	3.88863	22.7246
AAEL010270	Recognition	ClasRec	GNBP	GNBPB	high	-	-	x	100	94.2116	42.1778	5.97634	12.557	1.50506	x	1.50506	1.41794	0.634801	0.0899474	0.18899
AAEL022879	Recognition	ClasRec	GNBP	GNBPB	high	-	-	x	0	0	0	0	0	0.0899474	x	0	0	0	0.0899474	0
AAEL009176	Recognition	ClasRec	GNBP	GNBPB	high	GNBPB3	-	x	0	0	0	0	0	0	x	0	0	0	0	0
AAEL009178	Recognition	ClasRec	GNBP	GNBPB	high	GNBPB4	-	x	0	0	0	0	0	0.455066	x	0.269491	0	0	0	0.455066
AAEL003894	Recognition	ClasRec	GNBP	GNBPB	high	GNBPB5	-	x	0	0	0	0	0	0.116174	x	0.0582685	0.116174	0	0	0.0830965
AAEL007064	Recognition	ClasRec	GNBP	GNBPB	high	GNBPB6	-	x	0	0	0	0	0	0.35461	x	0.265312	0.35461	0	0	0.0830965
AAEL012007	Recognition	ClasRec	PGRP	atypicalPGRP	high	-	-	x	3.06805	100	57.4729	9.54125	1.53466	337.717	x	10.3613	337.717	194.096	32.2224	5.1828
AAEL021026	Recognition	ClasRec	PGRP	PGRPL	high	-	PGRP-LA	x	100	15.8039	10.5062	11.7983	58.8683	23.2408	x	23.2408	3.67295	2.44172	2.74203	13.6815
AAEL012380	Recognition	ClasRec	PGRP	PGRPL	high	PGRPLA	PGRP-LA	x	100	26.0126	0	16.8416	84.7708	5.6401	x	5.6401	1.46714	0	0.949884	4.78116
AAEL014640	Recognition	ClasRec	PGRP	PGRPL	high	PGRPLC	PGRP-LF	x	45.6289	63.9398	100	56.6232	51.5547	225.328	x	102.815	144.075	225.328	127.588	116.167
AAEL019745	Recognition	ClasRec	PGRP	PGRPL	high	-	PGRP-LD	x	12.2021	56.7397	100	0.408993	25.302	75.0797	x	9.16128	42.6	75.0797	0.30707	18.9967
AAEL010171	Recognition	ClasRec	PGRP	PGRPL	high	PGRPLB	PGRP-LB	x	1.41199	41.9952	100	2.21311	0.874721	2169.35	x	30.631	911.024	2169.35	48.0102	18.9758
AAEL027982	Recognition	ClasRec	PGRP	PGRPL	high	PGRP-LE	PGRP-LE	x	3.51886	36.8002	100	47.458	2.99373	64.8417	x	2.28169	23.8619	64.8417	30.7726	1.94118
AAEL009474	Recognition	ClasRec	PGRP	PGRPS	high	PGRPS1	PGRP-SA	x	100	63.285	28.3685	84.1724	79.0749	29.0419	x	29.0419	18.3792	8.23875	24.4453	22.9649
AAEL011551	Recognition	ClasRec	PGRP	PGRPS	high	-	CG9380	x	3.69594	64.9008	100	51.1192	5.66239	551.728	x	20.3915	358.076	551.728	282.039	31.241
AAEL017056	Recognition	ClasRec	PGRP	PGRPS	high	PGRPS4	PGRP-SC1a	x	0	13.6246	11.5422	100	15.311	5.2492	x	0	0.715183	0.605876	5.2492	0.803704
AAEL007039	Recognition	ClasRec	PGRP	PGRPS	high	PGRP-SC1	PGRP-SC1a	x	0	0	9.69962	100	10.3207	3.74033	x	0	0	0.362798	3.74033	0.386027
AAEL019858	Recognition	ClasRec	SCR	SCR_other	high	-	CG42339	x	100	9.00761	0	0	0	1.28973	x	1.28973	0.116174	0	0	0
AAEL027694	Recognition	ClasRec	SCR	SCRA	high	-	-	x	100	6.73654	0.970931	0	75.9585	83.9927	x	83.9927	5.6582	0.815511	0	63.7996
AAEL001914	Recognition	ClasRec	SCR	SCRA	high	-	bark	x	84.6066	70.035	100	33.9011	26.8879	43.7045	x	36.9769	30.6084	43.7045	14.8163	11.7512
AAEL023587	Recognition	ClasRec	SCR	SCRA	high	-	teq	x	63.9631	35.0586	23.7791	7.09952	100	1.01112	x	0.646746	0.354485	0.240436	0.0717849	1.01112
AAEL022263	Recognition	ClasRec	SCR	SCRA	high	-	Loxl2	x	0	0	0	0	0	0.977944	x	0.407448	0.244523	0.0934372	0.0735532	0.977944
AAEL009192	Recognition	ClasRec	SCR	SCRA	high	SCRASP1	teq	x	0	0	0	0	0	0.446859	x	0.446859	0.122985	0.207491	0.0735532	0.291392
AAEL010655	Recognition	ClasRec	SCR	SCRA	high	SCRASP2	Corin	x	0	0	0	0	0	0.0944949	x	0.0465059	0	0	0.0899474	0.0944949
AAEL000256	Recognition	ClasRec	SCR	SCRB	high	SCRB9	emp	x	100	18.9671	2.52823	0.252382	37.1301	187.152	x	187.152	35.4974	4.73164	0.472339	69.49
AAEL027927	Recognition	ClasRec	SCR	SCRB	high	-	pes	x	100	7.31487	0.25623	0	10.1565	344.287	x	344.287	25.1842	0.882167	0	34.9675
AAEL005979	Recognition	ClasRec	SCR	SCRB	high	SCRB3	dsb	x	100	4.17723	2.20212	0	61.7947	8.48613	x	8.48613	0.354485	0.186874	0	5.24398
AAEL011222	Recognition	ClasRec	SCR	SCRB	high	SCRB5	CG40006	x	100	3.1806	0.29754	0.0478786	1.40702	341.49	x	341.49	10.8614	1.01607	0.163501	4.80482
AAEL009423	Recognition	ClasRec	SCR	SCRB	high	SCRBQ2	crq	x	100	73.7361	91.3205	40.5683	48.7961	23.9536	x	23.9536	17.6625	21.8746	9.71757	11.6884
AAEL002741	Recognition	ClasRec	SCR	SCRB	high	SCRB6	CG10345	x	42.8095	100	1.11858	0	43.4946	18.5495	x	7.94095	18.5495	0.207491	0	8.06804
AAEL000234	Recognition	ClasRec	SCR	SCRB	high	SCRB7	CG2736	x	9.89481	100	49.2311	14.0177	4.71882	104.035	x	10.294	104.035	51.2173	14.5833	4.90921
AAEL008370	Recognition	ClasRec	SCR	SCRB	high	SCRB17	pes	x	12.2643	54.635	100	76.486	9.12268	15.8496	x	1.94385	8.65946	15.8496	12.1228	1.44591
AAEL009432	Recognition	ClasRec	SCR	SCRB	high	SCRBQ3	crq	x	1.85803	2.00114	4.31137	100	4.52824	102.603	x	1.90639	2.05322	4.42358	102.603	4.6461
AAEL000227	Recognition	ClasRec	SCR	SCRB	high	SCRB8	CG3829	x	7.10704	25.1082	32.0917	100	7.67107	22.6342	x	1.60862	5.68305	7.26371	22.6342	1.73629
AAEL009420	Recognition	ClasRec	SCR	SCRB	high	SCRBQ1	crq	x	3.9089	23.6544	30.0395	100	3.60104	50.9239	x	1.99056	12.0458	15.2973	50.9239	1.83379
AAEL019436	Recognition	ClasRec	SCR	SCRB	high	-	Snmp2	x	57.3178	26.3103	1.51945	0.0668744	100	107.343	x	61.5266	28.2422	1.63102	0.0717849	107.343
AAEL005374	Recognition	ClasRec	SCR	SCRB	high	SCRB1	Snmp1	x	0	0	0	0	0	0.176089	x	0	0	0	0	0.176089
AAEL006355	Recognition	ClasRec	SCR	SCRC	high	SCRC1	Sr-CI	x	0	0	0	0	0	0.72102	x	0.0581605	0.72102	0.0934372	0	0.0929924
AAEL006361	Recognition	ClasRec	SCR	SCRC	high	SCRC2	Sr-CI	x	0	0	0	0	0	0.855332	x	0.752044	0.855332	0.0934372	0	0.166193
AAEL019726	Recognition	OtheRec	CTL	atypicalLECTIN	low	-	Mp	x	100	52.8732	9.94629	0.174711	5.8386	42.1	x	42.1	22.2596	4.18739	0.0735532	2.45805
AAEL011622	Recognition	OtheRec	CTL	atypicalLECTIN	low	-	-	x	14.2473	100	28.2205	4.20396	66.3989	16.4424	x	2.34259	16.4424	4.64012	0.691231	10.9176
AAEL025598	Recognition	OtheRec	CTL	atypicalLECTIN	low	-	-	x	0	0	0	0	0	0.122137	x	0.0908306	0.122137	0	0	0
AAEL006825	Recognition	OtheRec	CTL	CTL	high	-	CG15765	x	100	65.0621	0	0	2.80781	2.95948	x	2.95948	1.9255	0	0	0.0830965
AAEL022136	Recognition	OtheRec	CTL	CTL	high	-	rgn	x	100	27.2356	14.439	10.7647	49.8871	335.687	x	335.687	91.4264	48.4698	36.1355	167.465
AAEL026955	Recognition	OtheRec	CTL	CTL	high	-	-	x	100	23.2264	13.0067	0.795576	10.2663	27.5136	x	27.5136	6.3904	3.5786	0.218891	2.82463
AAEL009338	Recognition	OtheRec	CTL	CTL	high	CTL10	CG13587	x	100	20.2321	10.6573	6.94659	32.4013	155.261	x	155.261	31.4127	16.5466	10.7854	50.3068
AAEL018207	Recognition	OtheRec	CTL	CTL	high	CTL8	nw	x	100	12.1063	10.2864	1.18257	2.15632	33.7219	x	33.7219	4.08247	3.46877	0.398786	0.727153
AAEL018265	Recognition	OtheRec	CTL	CTL	high	CTL9	CG14866	x	100	68.0498	15.1799	56.8489	40.2093	6.34068	x	6.34068	4.31482	0.962509	3.6046	2.54954
AAEL014382	Recognition	OtheRec	CTL	CTL	high	CTLMA14	-	x	7.61956	94.4369	100	8.05881	26.1453	47.9507	x	3.65363	45.2832	47.9507	3.86426	12.5369
AAEL005482	Recognition	OtheRec	CTL	CTL	high	CTL18	-	x	2.69462	92.1886	100	0	1.49902	48.8091	x	1.31522	44.9964	48.8091	0	0.73166
AAEL029068	Recognition	OtheRec	CTL	CTL	high	-	-	x	0	0	0	0	0	0.238311	x	0	0.238311	0	0	0.176089
AAEL014384	Recognition	OtheRec	CTL	CTL	high	-	-	x	0	0	0	0	0	0	x	0	0	0	0	0
AAEL008299	Recognition	OtheRec	CTL	CTL	high	CTL11	-	x	0	0	0	0	0	0.18899	x	0	0	0	0	0.18899
AAEL019633	Recognition	OtheRec	CTL	CTL	high	-	-	x	0	0	0	0	0	0.717257	x	0.48684	0.116174	0.186874	0	0.717257
AAEL013853	Recognition	OtheRec	CTL	CTLGA	high	CTLGA2	CG4115	x	100	3.77634	5.6082	9.53866	7.91189	18.9385	x	18.9385	0.715183	1.06211	1.80648	1.4984
AAEL011078	Recognition	OtheRec	CTL	CTLGA	high	CTLGA1	CG6055	x	100	3.21363	0	0	73.015	3.61505	x	3.61505	0.116174	0	0	2.63953
AAEL008681	Recognition	OtheRec	CTL	CTLGA	high	CTL12	-	x	95.1805	68.6894	100	52.1027	93.5446	19.2546	x	18.3267	13.2259	19.2546	10.0322	18.0117
AAEL011070	Recognition	OtheRec	CTL	CTLGA	high	CTLGA3	Clect27	x	50.8713	4.66546	0.96519	0.168767	100	312.698	x	159.073	14.5888	3.01813	0.52773	312.698
AAEL011612	Recognition	OtheRec	CTL	CTLMA	high	CTLMA6	tfc	x	100	10.1588	0	6.43185	93.5165	1.14358	x	1.14358	0.116174	0	0.0735532	1.06943
AAEL005641	Recognition	OtheRec	CTL	CTLMA	high	CTLGA5	lectin-37Da	x	4.09612	100	13.5469	22.2098	2.93827	58.0817	x	2.37909	58.0817	7.86828	12.8998	1.7066
AAEL029039	Recognition	OtheRec	CTL	CTLMA	high	-	lectin-33A	x	4.51618	83.8496	100	12.6723	0	1.29022	x	0.0582685	1.08184	1.29022	0.163501	0
AAEL029058	Recognition	OtheRec	CTL	CTLMA	high	-	lectin-33A	x	0	67.6051	100	5.83747	0	1.22973	x	0	0.831357	1.22973	0.0717849	0
AAEL011453	Recognition	OtheRec	CTL	CTLMA	high	CTL14	lectin-37Da	x	26.7513	49.4159	100	66.5698	0	1.94159	x	0.519402	0.959456	1.94159	1.29251	0
AAEL011408	Recognition	OtheRec	CTL	CTLMA	high	CTL21	lectin-37Da	x	29.4877	23.9965	100	18.7728	22.5618	2.03695	x	0.600651	0.488797	2.03695	0.382392	0.459574
AAEL000543	Recognition	OtheRec	CTL	CTLMA	high	CTLMA11	lectin-37Da	x	12.9565	15.6816	12.2564	4.93704	100	9.271	x	1.20119	1.45384	1.13629	0.457713	9.271
AAEL002524	Recognition	OtheRec	CTL	CTLMA	high	CTL24	lectin-37Da	x	97.51	82.2416	7.65821	1.52047	100	15.3582	x	14.9758	12.6308	1.17616	0.233517	15.3582
AAEL011621	Recognition	OtheRec	CTL	CTLMA	high	CTLMA13	-	x	29.9633	26.8271	0	0	100	1.34453	x	0.402865	0.360697	0	0	1.34453
AAEL022823	Recognition	OtheRec	CTL	CTLMA	high	-	lectin-37Da	x	0	0	0	0	0	0	x	0	0	0	0	0
AAEL029020	Recognition	OtheRec	CTL	CTLMA	high	-	lectin-33A	x	0	0	0	0	0	0.376477	x	0.29809	0	0.120218	0	0.376477
AAEL029053	Recognition	OtheRec	CTL	CTLMA	high	-	lectin-33A	x	0	0	0	0	0	0.0944949	x	0	0	0	0	0.0944949
AAEL023353	Recognition	OtheRec	CTL	CTLMA	high	-	lectin-37Da	x	0	0	0	0	0	0.836019	x	0.836019	0.611183	0.414981	0	0.0929924
AAEL025802	Recognition	OtheRec	CTL	CTLMA	high	-	-	x	0	0	0	0	0	0	x	0	0	0	0	0
AAEL027215	Recognition	OtheRec	CTL	CTLMA	high	-	lectin-37Da	x	0	0	0	0	0	0	x	0	0	0	0	0
AAEL027443	Recognition	OtheRec	CTL	CTLMA	high	-	lectin-37Da	x	0	0	0	0	0	0.0930117	x	0.0930117	0	0	0	0
AAEL012353	Recognition	OtheRec	CTL	CTLMA	high	CTL15	lectin-37Da	x	0	0	0	0	0	0.749949	x	0.547181	0.70922	0.447927	0	0.749949
AAEL000533	Recognition	OtheRec	CTL	CTLMA	high	CTL16	lectin-37Da	x	0	0	0	0	0	0.407232	x	0.407232	0	0	0	0
AAEL011404	Recognition	OtheRec	CTL	CTLMA	high	CTL19	lectin-37Da	x	0	0	0	0	0	0.207491	x	0.17459	0.122262	0.207491	0	0
AAEL011407	Recognition	OtheRec	CTL	CTLMA	high	CTL20	lectin-37Da	x	0	0	0	0	0	0.360697	x	0.17459	0.360697	0.348325	0.161732	0
AAEL000556	Recognition	OtheRec	CTL	CTLMA	high	CTL25	lectin-37Da	x	0	0	0	0	0	0.232642	x	0.232642	0	0	0	0
AAEL009209	Recognition	OtheRec	CTL	CTLMA	high	CTLGA6	lectin-37Da	x	0	0	0	0	0	0	x	0	0	0	0	0
AAEL011079	Recognition	OtheRec	CTL	CTLMA	high	CTLMA10	lectin-37Da	x	0	0	0	0	0	0	x	0	0	0	0	0
AAEL011455	Recognition	OtheRec	CTL	CTLMA	high	CTLMA12	lectin-37Da	x	0	0	0	0	0	0.614487	x	0.614487	0	0.307092	0.0735532	0.0944949
AAEL000283	Recognition	OtheRec	CTL	CTLMA	high	CTLMA16	lectin-37Da	x	0	0	0	0	0	0.0582685	x	0.0582685	0	0	0	0
AAEL000563	Recognition	OtheRec	CTL	CTLMA	high	mosGCTL-1	lectin-37Da	x	0	0	0	0	0	0.0581605	x	0.0581605	0	0	0	0
AAEL021200	Recognition	OtheRec	CTL	CTLSE	high	-	fw	x	11.8109	3.01477	1.13153	0	100	33.0303	x	3.90117	0.995788	0.373749	0	33.0303
AAEL014357	Recognition	OtheRec	CTL	CTLSE	high	-	CG9095	x	0	0	0	0	0	0.625767	x	0.104666	0.476872	0.207491	0.0735532	0.625767
AAEL009384	Recognition	OtheRec	FREP	FREP	high	-	CG30280	x	100	86.4274	10.9875	15.7915	18.1885	1.94452	x	1.94452	1.6806	0.213655	0.30707	0.35368
AAEL023956	Recognition	OtheRec	FREP	FREP	high	-	CG9593	x	100	18.5246	3.8372	0	18.087	3.62535	x	3.62535	0.671581	0.139112	0	0.655716
AAEL013417	Recognition	OtheRec	FREP	FREP	high	-	CG30280	x	100	82.315	8.39391	25.5944	50.2033	1.11466	x	1.11466	0.917533	0.0935636	0.285291	0.559597
AAEL000508	Recognition	OtheRec	FREP	FREP	high	-	CG9593	x	100	17.2865	16.2195	3.00648	22.9943	11.4218	x	11.4218	1.97444	1.85256	0.343395	2.62637
AAEL009723	Recognition	OtheRec	FREP	FREP	high	-	CG41520	x	46.6555	100	1.69828	2.40823	6.65105	6.71582	x	3.1333	6.71582	0.114053	0.161732	0.446673
AAEL019868	Recognition	OtheRec	FREP	FREP	high	-	CG30280	x	23.6146	100	98.8834	19.0798	10.7047	10.0465	x	2.37243	10.0465	9.93428	1.91684	1.07544
AAEL021180	Recognition	OtheRec	FREP	FREP	high	-	CG30280	x	4.37155	100	22.601	39.0269	51.9412	1.06383	x	0.0465059	1.06383	0.240436	0.41518	0.552566
AAEL006702	Recognition	OtheRec	FREP	FREP	high	-	CG1791	x	3.33168	100	95.3449	8.19848	0.925364	1299.92	x	43.3092	1299.92	1239.41	106.574	12.029
AAEL007942	Recognition	OtheRec	FREP	FREP	high	-	CG30280	x	3.11392	100	19.8149	0.0356436	0.273201	3504.35	x	109.123	3504.35	694.383	1.24908	9.57392
AAEL006704	Recognition	OtheRec	FREP	FREP	high	-	-	x	3.10068	100	31.3182	0.463242	0.980992	57927.7	x	1796.15	57927.7	18141.9	268.345	568.266
AAEL011007	Recognition	OtheRec	FREP	FREP	high	-	CG30280	x	4.27533	94.0525	100	20.452	3.49539	931.229	x	39.8131	875.844	931.229	190.455	32.5501
AAEL006691	Recognition	OtheRec	FREP	FREP	high	-	CG1791	x	2.35127	62.9303	100	10.2503	1.41222	1118.95	x	26.3097	704.161	1118.95	114.696	15.8022
AAEL028145	Recognition	OtheRec	FREP	FREP	high	-	CG1791	x	2.22556	56.6846	100	3.13268	1.28577	1339.81	x	29.8183	759.468	1339.81	41.972	17.2268
AAEL006699	Recognition	OtheRec	FREP	FREP	high	-	CG1791	x	2.21642	56.6388	100	6.57571	1.03423	2164.32	x	47.9703	1225.84	2164.32	142.319	22.3841
AAEL011633	Recognition	OtheRec	FREP	FREP	high	-	CG30280	x	95.6415	53.5884	100	22.6739	42.134	1.1178	x	1.06908	0.599008	1.1178	0.253448	0.470972
AAEL011009	Recognition	OtheRec	FREP	FREP	high	-	CG30280	x	9.75556	81.4119	96.4466	100	38.0308	16.7696	x	1.63597	13.6524	16.1737	16.7696	6.3776
AAEL025744	Recognition	OtheRec	FREP	FREP	high	-	CG30280	x	36.4102	9.00764	8.86613	0	100	1.35592	x	0.493695	0.122137	0.120218	0	1.35592
AAEL003294	Recognition	OtheRec	FREP	FREP	high	-	CG30280	x	0	0	0	0	0	0.599008	x	0.104774	0.599008	0.0934372	0.0717849	0
AAEL014773	Recognition	OtheRec	FREP	FREP	high	-	sca	x	0	0	0	0	0	0.565908	x	0.565908	0.122262	0	0	0
AAEL014432	Recognition	OtheRec	FREP	FREP	high	-	CG30280	x	0	0	0	0	0	0.0465059	x	0.0465059	0	0	0	0
AAEL025451	Recognition	OtheRec	FREP	FREP	high	-	-	x	0	0	0	0	0	0.163043	x	0.163043	0	0	0	0
AAEL011634	Recognition	OtheRec	FREP	FREP	high	-	CG30280	x	0	0	0	0	0	0	x	0	0	0	0	0
AAEL001713	Recognition	OtheRec	FREP	FREP	high	-	-	x	0	0	0	0	0	0	x	0	0	0	0	0
AAEL000726	Recognition	OtheRec	FREP	FREP	high	-	-	x	0	0	0	0	0	0	x	0	0	0	0	0
AAEL000749	Recognition	OtheRec	FREP	FREP	high	-	-	x	0	0	0	0	0	0.210176	x	0.210176	0	0	0	0
AAEL008104	Recognition	OtheRec	FREP	FREP	high	-	CG30280	x	0	0	0	0	0	0.17459	x	0.17459	0.122137	0	0	0
AAEL013506	Recognition	OtheRec	FREP	FREP	high	-	CG30280	x	0	0	0	0	0	0.32587	x	0.32587	0.122137	0.300928	0.0735532	0
AAEL002713	Recognition	OtheRec	FREP	FREP	high	-	CG30280	x	0	0	0	0	0	0.122262	x	0	0.122262	0	0	0
AAEL010117	Recognition	OtheRec	FREP	FREP	high	-	CG30280	x	0	0	0	0	0	0.0908306	x	0.0908306	0	0	0	0
AAEL001766	Recognition	OtheRec	LRIM	atypicalLRR	high	-	-	x	100	30.905	8.85494	2.57259	14.2417	21.2195	x	21.2195	6.55791	1.87898	0.545892	3.02202
AAEL021071	Recognition	OtheRec	LRIM	atypicalLRR	low	-	CG8852	x	100	76.5261	55.287	28.725	55.69	21.315	x	21.315	16.3115	11.7844	6.12273	11.8703
AAEL000650	Recognition	OtheRec	LRIM	atypicalLRR	low	-	CG8852	x	100	29.3838	16.9253	0	13.6287	2.05801	x	2.05801	0.604721	0.348325	0	0.28048
AAEL000668	Recognition	OtheRec	LRIM	atypicalLRR	low	-	CG8852	x	100	25.3516	25.7825	4.07815	2.8533	6.17142	x	6.17142	1.56455	1.59115	0.25168	0.176089
AAEL026478	Recognition	OtheRec	LRIM	atypicalLRR	low	-	-	x	100	38.1796	11.0961	7.98203	45.32	6.97795	x	6.97795	2.66416	0.774278	0.556982	3.16241
AAEL007127	Recognition	OtheRec	LRIM	atypicalLRR	low	-	CG13708	x	100	27.4735	6.57226	1.69273	64.6346	13.0357	x	13.0357	3.58138	0.856743	0.22066	8.4256
AAEL012412	Recognition	OtheRec	LRIM	atypicalLRR	low	-	CG14762	x	100	19.9508	22.7425	9.07781	15.3595	2.97255	x	2.97255	0.593046	0.676033	0.269842	0.456569
AAEL008398	Recognition	OtheRec	LRIM	atypicalLRR	high	-	Lrrk	x	67.5544	100	88.6263	54.5382	81.0896	7.06509	x	4.77278	7.06509	6.26153	3.85317	5.72905
AAEL024346	Recognition	OtheRec	LRIM	atypicalLRR	high	-	LRR	x	64.0505	100	81.349	29.3612	33.7095	33.8456	x	21.6783	33.8456	27.5331	9.93749	11.4092
AAEL014027	Recognition	OtheRec	LRIM	atypicalLRR	low	-	-	x	53.7509	100	63.9634	57.2647	73.2688	6.47876	x	3.48239	6.47876	4.14404	3.71004	4.7469
AAEL003111	Recognition	OtheRec	LRIM	atypicalLRR	high	-	Fili	x	16.9542	100	16.9683	6.78361	14.5958	3.22677	x	0.547073	3.22677	0.547528	0.218891	0.470972
AAEL003115	Recognition	OtheRec	LRIM	atypicalLRR	high	-	Fili	x	13.3483	100	44.7596	5.38321	13.3203	4.67527	x	0.624068	4.67527	2.09263	0.25168	0.622762
AAEL012634	Recognition	OtheRec	LRIM	atypicalLRR	low	-	-	x	0	100	98.6744	12.2574	0	1.18572	x	0	1.18572	1.17	0.145338	0
AAEL027836	Recognition	OtheRec	LRIM	atypicalLRR	low	-	CG9003	x	37.0392	100	90.4448	40.5715	57.8962	21.2803	x	7.88205	21.2803	19.2469	8.63372	12.3205
AAEL027361	Recognition	OtheRec	LRIM	atypicalLRR	low	-	CG3040	x	80.0425	73.8455	100	24.4884	32.2191	9.78174	x	7.82954	7.22338	9.78174	2.39539	3.15159
AAEL024532	Recognition	OtheRec	LRIM	atypicalLRR	low	-	-	x	0.880351	31.9265	100	13.7391	1.57301	5.28265	x	0.0465059	1.68656	5.28265	0.725787	0.0830965
AAEL027202	Recognition	OtheRec	LRIM	atypicalLRR	low	-	-	x	0	31.7304	100	12.5774	0	1.15555	x	0	0.36666	1.15555	0.145338	0
AAEL027960	Recognition	OtheRec	LRIM	atypicalLRR	low	-	-	x	0	0	100	6.61704	0	1.08485	x	0	0	1.08485	0.0717849	0
AAEL007778	Recognition	OtheRec	LRIM	atypicalLRR	low	-	CG4950	x	51.6195	45.5591	100	10.8752	8.87514	22.7477	x	11.7423	10.3637	22.7477	2.47386	2.01889
AAEL005221	Recognition	OtheRec	LRIM	atypicalLRR	low	-	CG32687	x	22.1868	40.046	100	55.8496	22.8718	167.306	x	37.1199	66.9995	167.306	93.4399	38.266
AAEL005762	Recognition	OtheRec	LRIM	atypicalLRR	low	-	CG18095	x	7.58653	61.5397	33.7412	100	53.1124	24.7984	x	1.88134	15.2608	8.36726	24.7984	13.171
AAEL002819	Recognition	OtheRec	LRIM	atypicalLRR	low	-	CG11807	x	92.3045	62.9184	82.7917	28.2676	100	5.50825	x	5.08436	3.4657	4.56037	1.55705	5.50825
AAEL000387	Recognition	OtheRec	LRIM	atypicalLRR	low	-	CG8852	x	75.64	35.0202	21.7942	6.85862	100	1.04664	x	0.791677	0.366535	0.228107	0.0717849	1.04664
AAEL003331	Recognition	OtheRec	LRIM	atypicalLRR	high	-	conv	x	22.8598	19.694	6.85109	2.20099	100	21.38	x	4.88742	4.21057	1.46476	0.470571	21.38
AAEL008365	Recognition	OtheRec	LRIM	atypicalLRR	low	-	-	x	51.5825	29.4837	11.3806	0	100	2.87954	x	1.48534	0.848995	0.327709	0	2.87954
AAEL025368	Recognition	OtheRec	LRIM	atypicalLRR	high	-	LRR	x	0	0	0	0	0	0.230262	x	0.0882352	0	0	0.230262	0
AAEL015019	Recognition	OtheRec	LRIM	atypicalLRR	high	-	-	x	0	0	0	0	0	0.244523	x	0.181661	0.244523	0.114053	0	0
AAEL012722	Recognition	OtheRec	LRIM	atypicalLRR	low	-	-	x	0	0	0	0	0	0.654953	x	0	0.353269	0.17821	0.654953	0
AAEL012724	Recognition	OtheRec	LRIM	atypicalLRR	low	-	-	x	0	0	0	0	0	0.563402	x	0.563402	0.201919	0.342851	0	0
AAEL024539	Recognition	OtheRec	LRIM	atypicalLRR	low	-	CG9003	x	0	0	0	0	0	0.268479	x	0	0.268479	0	0	0
AAEL024654	Recognition	OtheRec	LRIM	atypicalLRR	low	-	-	x	0	0	0	0	0	0	x	0	0	0	0	0
AAEL027849	Recognition	OtheRec	LRIM	atypicalLRR	low	-	-	x	0	0	0	0	0	0.606187	x	0.349287	0.606187	0.503988	0.0735532	0.176089
AAEL003408	Recognition	OtheRec	LRIM	atypicalLRR	low	-	atk	x	0	0	0	0	0	0.174482	x	0.174482	0	0.114053	0	0
AAEL007785	Recognition	OtheRec	LRIM	atypicalLRR	low	-	CG4950	x	0	0	0	0	0	0.682198	x	0.20726	0.586834	0.682198	0	0.448175
AAEL010232	Recognition	OtheRec	LRIM	atypicalLRR	low	-	-	x	0	0	0	0	0	0.179895	x	0.116429	0	0	0.179895	0
AAEL010808	Recognition	OtheRec	LRIM	atypicalLRR	low	-	Lrr47	x	0	0	0	0	0	0.333873	x	0.209441	0.238311	0.333873	0.147106	0.270584
AAEL012726	Recognition	OtheRec	LRIM	atypicalLRR	low	-	-	x	0	0	0	0	0	0.610809	x	0.437716	0.610809	0	0	0.270584
AAEL021586	Recognition	OtheRec	LRIM	atypicalLRR	low	-	-	x	0	0	0	0	0	0.0899474	x	0.0465059	0	0	0.0899474	0
AAEL023577	Recognition	OtheRec	LRIM	atypicalLRR	low	-	-	x	0	0	0	0	0	0.682198	x	0.162827	0.360573	0.682198	0	0
AAEL023798	Recognition	OtheRec	LRIM	atypicalLRR	low	-	-	x	0	0	0	0	0	0.163043	x	0.163043	0	0	0	0
AAEL012255	Recognition	OtheRec	LRIM	LRIM_other	high	LRIM13	CG8852	x	100	22.7355	11.1777	0	34.8648	1.07551	x	1.07551	0.244523	0.120218	0	0.374975
AAEL007224	Recognition	OtheRec	LRIM	LRIM_other	high	LRIM22	CG8852	x	0	0	0	0	0	0.0944949	x	0	0	0	0	0.0944949
AAEL009792	Recognition	OtheRec	LRIM	LRIM_other	high	LRIM25	CG8852	x	0	0	0	0	0	0.290798	x	0.290798	0.116174	0.213655	0.145338	0
AAEL010125	Recognition	OtheRec	LRIM	LRIMCL	high	LRIM17	alrm	x	100	23.8118	0	0	0	1.00133	x	1.00133	0.238436	0	0	0
AAEL012911	Recognition	OtheRec	LRIM	LRIMCL	high	LRIM18	igl	x	100	32.1302	30.2847	7.9761	41.3001	47.6013	x	47.6013	15.2944	14.4159	3.79672	19.6594
AAEL009894	Recognition	OtheRec	LRIM	LRIMCL	high	LRIM21	-	x	100	71.023	40.6428	18.7547	49.3725	26.1585	x	26.1585	18.5786	10.6315	4.90596	12.9151
AAEL000762	Recognition	OtheRec	LRIM	LRIMCL	high	LRIM19	CG8852	x	0	0	0	0	0	0.297982	x	0.297982	0	0	0	0.187487
AAEL006920	Recognition	OtheRec	LRIM	LRIMCL	high	LRIM20	CG8852	x	0	0	0	0	0	0.207491	x	0	0	0.207491	0	0
AAEL024406	Recognition	OtheRec	LRIM	LRIML	high	-	alrm	x	100	27.2606	7.3022	1.16226	33.2436	12.3527	x	12.3527	3.36742	0.902018	0.14357	4.10647
AAEL012086	Recognition	OtheRec	LRIM	LRIML	high	LRIM1	-	x	100	22.9342	11.6707	0.560042	76.1042	13.1335	x	13.1335	3.01206	1.53278	0.0735532	9.99515
AAEL010128	Recognition	OtheRec	LRIM	LRIML	high	LRIM4	alrm	x	55.6233	32.1119	100	7.87299	37.7004	1.84603	x	1.02682	0.592796	1.84603	0.145338	0.695962
AAEL010132	Recognition	OtheRec	LRIM	LRIML	high	LRIM3	alrm	x	0	0	0	0	0	0.507639	x	0.507639	0.244274	0	0	0.365079
AAEL001401	Recognition	OtheRec	LRIM	LRIMS	high	LRIM10A	CG8852	x	100	70.2555	35.1202	1.41097	14.7288	6.37487	x	6.37487	4.4787	2.23887	0.0899474	0.938939
AAEL001402	Recognition	OtheRec	LRIM	LRIMS	high	LRIM10B	CG8852	x	100	33.14	31.254	1.64559	28.1601	9.82825	x	9.82825	3.25708	3.07172	0.161732	2.76764
AAEL001420	Recognition	OtheRec	LRIM	LRIMS	high	LRIM8	CG8852	x	100	20.9981	17.9711	0.5616	6.29646	13.0971	x	13.0971	2.75014	2.35369	0.0735532	0.824652
AAEL001414	Recognition	OtheRec	LRIM	LRIMS	high	LRIM9	CG8852	x	100	21.2009	15.8955	0	4.43104	19.9717	x	19.9717	4.23417	3.1746	0	0.884952
AAEL004466	Recognition	OtheRec	LRIM	LRIMS	high	LRIM23	CG8852	x	1.86836	53.042	100	34.1966	22.1992	2.48912	x	0.0465059	1.32028	2.48912	0.851195	0.552566
AAEL010656	Recognition	OtheRec	LRIM	LRIMS	high	LRIM12	CG8852	x	9.45347	7.61979	8.06716	0	100	17.5601	x	1.66004	1.33804	1.4166	0	17.5601
AAEL012763	Recognition	OtheRec	LRIM	LRIMS	high	LRIM24	CG8852	x	17.5204	0	3.75448	0	100	3.20199	x	0.561	0	0.120218	0	3.20199
AAEL027236	Recognition	OtheRec	LRIM	LRIMS	high	-	CG8852	x	0	0	0	0	0	0	x	0	0	0	0	0
AAEL012767	Recognition	OtheRec	LRIM	LRIMS	high	LRIM5	CG8852	x	0	0	0	0	0	0.0899474	x	0	0	0	0.0899474	0.0830965
AAEL012538	Recognition	OtheRec	LRIM	LRIMS	high	LRIM6	CG8852	x	0	0	0	0	0	0.327709	x	0.300271	0.122262	0.327709	0	0
AAEL001417	Recognition	OtheRec	LRIM	LRIMS	high	LRIM7	CG8852	x	0	0	0	0	0	0.0934372	x	0.0591665	0	0.0934372	0	0
AAEL007103	Recognition	OtheRec	LRIM	LRIMTM	high	LRIM15	CG4950	x	100	43.0788	10.7968	0	16.3939	2.22692	x	2.22692	0.959332	0.240436	0	0.365079
AAEL008658	Recognition	OtheRec	LRIM	LRIMTM	high	LRIM16	CG4950	x	8.10338	92.5718	100	11.2576	3.75912	67.4316	x	5.46424	62.4227	67.4316	7.5912	2.53483
AAEL026650	Recognition	OtheRec	LRIM	LRR-Toll	high	-	-	x	0	0	0	0	0	0.120218	x	0	0	0.120218	0	0
AAEL012064	Recognition	OtheRec	ML	ML	high	-	Npc2b	x	100	10.0447	1.55184	0.498133	50.2334	384.631	x	384.631	38.6351	5.96886	1.91598	193.213
AAEL001654	Recognition	OtheRec	ML	ML	high	-	Npc2c	x	100	0	0	0	47.7312	1.26011	x	1.26011	0	0	0	0.601467
AAEL006854	Recognition	OtheRec	ML	ML	high	-	Npc2a	x	26.7534	79.3091	100	13.9814	12.926	2.08171	x	0.556927	1.65098	2.08171	0.291051	0.269081
AAEL009760	Recognition	OtheRec	ML	ML	high	-	Npc2c	x	2.91127	78.6612	100	31.3386	1.52872	2660.64	x	77.4583	2092.89	2660.64	833.806	40.6737
AAEL020314	Recognition	OtheRec	ML	ML	high	-	Npc2a	x	22.7433	66.6093	100	12.4155	0	3.35526	x	0.763097	2.23491	3.35526	0.416573	0
AAEL015136	Recognition	OtheRec	ML	ML	high	-	Npc2c	x	1.63423	26.2978	100	70.9198	4.76497	462.017	x	7.55042	121.5	462.017	327.662	22.015
AAEL025109	Recognition	OtheRec	ML	ML	high	-	Npc2f	x	2.9303	14.4559	100	8.64658	7.00082	64.8568	x	1.90049	9.37564	64.8568	5.60789	4.54051
AAEL007592	Recognition	OtheRec	ML	ML	high	-	Npc2c	x	5.09557	10.0123	42.3348	100	4.47392	39.8489	x	2.03053	3.98977	16.87	39.8489	1.7828
AAEL009556	Recognition	OtheRec	ML	ML	high	-	Npc2c	x	4.7587	22.8386	8.95301	100	5.94026	3.13092	x	0.148991	0.715058	0.280312	3.13092	0.185985
AAEL007591	Recognition	OtheRec	ML	ML	high	-	Npc2c	x	3.22231	1.29748	4.26175	100	4.93056	37.2227	x	1.19943	0.482959	1.58634	37.2227	1.83529
AAEL026174	Recognition	OtheRec	ML	ML	high	-	Npc2c	x	8.45032	2.26523	3.11336	100	0.789449	10.5259	x	0.889471	0.238436	0.327709	10.5259	0.0830965
AAEL004120	Recognition	OtheRec	ML	ML	high	-	Npc2g	x	32.0761	22.8306	5.81172	0.583522	100	15.4146	x	4.9444	3.51924	0.895853	0.0899474	15.4146
AAEL001650	Recognition	OtheRec	ML	ML	high	-	Npc2c	x	0	0	0	0	0	0.843282	x	0.44001	0.843282	0.213655	0.0735532	0.185985
AAEL009956	Recognition	OtheRec	ML	ML	high	-	Npc2c	x	0	0	0	0	0	0.0934372	x	0	0	0.0934372	0	0
AAEL015140	Recognition	OtheRec	ML	ML	high	-	Npc2c	x	0	0	0	0	0	0.414981	x	0	0	0.414981	0	0.0944949
AAEL001634	Recognition	OtheRec	ML	ML	high	-	Npc2c	x	0	0	0	0	0	0	x	0	0	0	0	0
AAEL015137	Recognition	OtheRec	ML	ML	high	-	Npc2c	x	0	0	0	0	0	0	x	0	0	0	0	0
AAEL009553	Recognition	OtheRec	ML	ML	high	-	Npc2c	x	0	0	0	0	0	0.0908306	x	0.0908306	0	0	0	0
AAEL009555	Recognition	OtheRec	ML	ML	high	-	Npc2c	x	0	0	0	0	0	0	x	0	0	0	0	0
AAEL015139	Recognition	OtheRec	ML	ML	high	-	Npc2c	x	0	0	0	0	0	0.294213	x	0	0	0	0.294213	0
AAEL027949	Recognition	OtheRec	NIMROD	DRAPER	high	-	drpr	x	100	81.9665	74.7711	32.9796	55.2873	35.908	x	35.908	29.4325	26.8488	11.8423	19.8525
AAEL019649	Recognition	OtheRec	NIMROD	EATER	high	-	eater	x	0	0	0	0	0	0.312034	x	0.312034	0.244398	0.120218	0.145338	0.283485
AAEL026517	Recognition	OtheRec	NIMROD	NIMA	high	-	NimA	x	0	0	0	0	0	0.381849	x	0.381849	0	0	0	0.176089
AAEL019650	Recognition	OtheRec	NIMROD	NIMC	high	-	NimB2	x	100	69.3517	13.7667	2.40717	14.3143	9.70091	x	9.70091	6.72774	1.33549	0.233517	1.38862
AAEL000636	Recognition	OtheRec	NIMROD	NIMC	high	-	NimC1	x	43.8175	100	11.3669	0	17.7273	1.05762	x	0.463422	1.05762	0.120218	0	0.187487
AAEL021410	Recognition	OtheRec	NIMROD	NIMC	high	-	NimC2	x	0	0	0	0	0	0.149099	x	0.149099	0	0	0	0
AAEL012267	Recognition	OtheRec	TEP	TEP	high	-	Mcr	x	100	28.3343	7.50586	1.96202	17.5211	81.5275	x	81.5275	23.1002	6.11934	1.59958	14.2845
AAEL001163	Recognition	OtheRec	TEP	TEP	high	-	Tep2	x	100	0	15.6096	0	0	1.20949	x	1.20949	0	0.188797	0	0
AAEL017023	Recognition	OtheRec	TEP	TEP	high	-	-	x	100	34.0336	12.027	0	28.4447	3.89576	x	3.89576	1.32587	0.468543	0	1.10814
AAEL001794	Recognition	OtheRec	TEP	TEP	high	-	Tep2	x	100	30.7081	10.7034	2.31613	50.288	10.8664	x	10.8664	3.33685	1.16307	0.25168	5.46448
AAEL025055	Recognition	OtheRec	TEP	TEP	high	-	-	x	61.3668	56.9219	49.3476	20.1111	100	4.04736	x	2.48374	2.30383	1.99727	0.813966	4.04736
AAEL008607	Recognition	OtheRec	TEP	TEP	high	-	Tep1	x	18.4265	16.0606	1.33982	0.76928	100	582.042	x	107.25	93.4796	7.79832	4.47754	582.042
AAEL025334	Recognition	OtheRec	TEP	TEP	low	-	-	x	0	0	0	0	0	0.0465059	x	0.0465059	0	0	0	0
AAEL019958	Recognition	OtheRec	TEP	TEP	high	-	-	x	0	0	0	0	0	0.234271	x	0.18243	0	0.234271	0	0
AAEL019959	Recognition	OtheRec	TEP	TEP	high	-	-	x	0	0	0	0	0	0.244274	x	0.116537	0.244274	0	0	0
AAEL000087	Recognition	OtheRec	TEP	TEP	high	-	-	x	0	0	0	0	0	0.500675	x	0.500675	0.116174	0	0	0
AAEL013072	RNAinterference	piRNA	piRNA	piRNA	high	-	papi	x	100	25.7701	12.9282	6.45391	55.6591	33.9363	x	33.9363	8.74544	4.38736	2.19022	18.8886
AAEL012437	RNAinterference	piRNA	piRNA	piRNA	high	-	-	x	100	79.0739	81.8436	81.9596	47.3502	9.21292	x	9.21292	7.28502	7.54018	7.55087	4.36234
AAEL009326	RNAinterference	piRNA	piRNA	piRNA	high	-	Fmr1	x	100	57.5151	50.8047	30.8286	47.9453	57.1166	x	57.1166	32.8506	29.0179	17.6083	27.3847
AAEL001939	RNAinterference	piRNA	piRNA	piRNA	high	-	SoYb	x	99.6631	100	86.548	55.1342	98.7584	5.42076	x	5.4025	5.42076	4.69156	2.9887	5.35346
AAEL000289	RNAinterference	piRNA	piRNA	piRNA	high	-	Gasz	x	87.5926	87.478	90.9948	51.9019	100	8.08991	x	7.08616	7.07689	7.36139	4.19881	8.08991
AAEL010029	RNAinterference	piRNA	piRNA	piRNA	high	-	Hen1	x	55.2904	71.7729	77.6238	37.2065	100	15.4701	x	8.55347	11.1033	12.0084	5.75587	15.4701
AAEL000293	RNAinterference	piRNA	SRRP	TSN	high	-	Tudor-SN	x	70.9684	87.2336	70.8961	100	56.6216	61.3148	x	43.5141	53.4871	43.4698	61.3148	34.7174
AAEL020359	RNAinterference	RNAi	0	0	high	-	vret	x	91.6046	55.278	52.9651	35.0935	100	6.12505	x	5.61082	3.3858	3.24414	2.14949	6.12505
AAEL021734	RNAinterference	RNAi	RNAi	RNAi	high	-	mino	x	59.8623	13.9568	100	5.22099	26.3833	1.13394	x	0.6788	0.158262	1.13394	0.0592027	0.29917
AAEL027589	RNAinterference	RNAi	RNAi	RNAi	high	-	qin	x	67.1358	59.8924	51.8289	37.7602	100	5.1843	x	3.48052	3.105	2.68697	1.95761	5.1843
AAEL007080	RNAinterference	RNAi	RNAi	RNAi	high	-	mino	x	44.5935	33.2357	32.7729	21.8693	100	24.513	x	10.9312	8.14708	8.03362	5.36082	24.513
AAEL021382	RNAinterference	RNAi	RNAi	RNAi	high	-	mino	x	0	0	0	0	0	0	x	0	0	0	0	0
AAEL013721	RNAinterference	RNAi	RNAi	RNAi	high	loqs2	-	x	0	0	0	0	0	0	x	0	0	0	0	0
AAEL019460	RNAinterference	RNAi	SRRP	Armitage	high	-	armi	x	94.8767	89.1526	88.172	78.5953	100	48.6111	x	46.1207	43.3381	42.8614	38.206	48.6111
AAEL001612	RNAinterference	RNAi	SRRP	DSRNA	high	-	Dcr-1	x	100	89.4584	85.1378	27.9028	48.1595	1.87864	x	1.87864	1.6806	1.59943	0.524193	0.904744
AAEL011753	RNAinterference	RNAi	SRRP	DSRNA	high	-	r2d2	x	100	44.7015	46.7334	29.5458	92.2082	12.5371	x	12.5371	5.60428	5.85903	3.7042	11.5602
AAEL026022	RNAinterference	RNAi	SRRP	DSRNA	high	-	pasha	x	100	36.5746	20.4639	7.71483	19.5846	62.5336	x	62.5336	22.8714	12.7968	4.82436	12.247
AAEL008687	RNAinterference	RNAi	SRRP	DSRNA	high	loqs	loqs	x	100	69.744	70.1751	35.009	65.6147	19.4432	x	19.4432	13.5605	13.6443	6.80689	12.7576
AAEL021519	RNAinterference	RNAi	SRRP	DSRNA	high	-	pasha	x	55.6686	100	29.1147	15.6464	70.2762	6.95324	x	3.87077	6.95324	2.02442	1.08793	4.88648
AAEL006794	RNAinterference	RNAi	SRRP	DSRNA	high	-	Dcr-2	x	27.878	63.1996	100	38.4222	21.8131	128.62	x	35.8567	81.2874	128.62	49.4187	28.0561
AAEL008592	RNAinterference	RNAi	SRRP	DSRNA	high	-	drosha	x	0	0	0	0	0	0.926038	x	0.86389	0.726858	0.775635	0.486965	0.926038
AAEL012410	RNAinterference	RNAi	SRRP	PAZPIWI	high	AGO1b	AGO1	x	100	78.5765	80.0903	47.6102	74.6716	101.719	x	101.719	79.927	81.4668	48.4284	75.9549
AAEL017251	RNAinterference	RNAi	SRRP	PAZPIWI	high	AGO2	AGO2	x	100	67.0083	51.5701	22.4985	40.0355	40.6259	x	40.6259	27.2227	20.9508	9.1402	16.2648
AAEL013233	RNAinterference	RNAi	SRRP	PAZPIWI	high	PIWI5	aub	x	100	87.8453	86.9312	62.5945	82.0214	25.6735	x	25.6735	22.553	22.3183	16.0702	21.0578
AAEL006287	RNAinterference	RNAi	SRRP	PAZPIWI	high	PIWI7	aub	x	100	26.7002	29.5339	7.4375	32.1089	2.19833	x	2.19833	0.586959	0.649252	0.163501	0.705858
AAEL007823	RNAinterference	RNAi	SRRP	PAZPIWI	high	-	AGO3	x	100	90.8687	30.1996	41.7864	73.1212	5.13223	x	5.13223	4.66359	1.54991	2.14457	3.75275
AAEL007698	RNAinterference	RNAi	SRRP	PAZPIWI	high	PIWI4	aub	x	71.2213	68.0188	62.7412	58.7299	100	16.0475	x	11.4293	10.9153	10.0684	9.4247	16.0475
AAEL013227	RNAinterference	RNAi	SRRP	PAZPIWI	high	PIWI6	aub	x	80.2229	53.682	56.3599	30.1483	100	19.5121	x	15.6532	10.4745	10.997	5.88256	19.5121
AAEL021425	RNAinterference	RNAi	SRRP	PAZPIWI	high	-	aub	x	0	0	0	0	0	0.216043	x	0.216043	0	0	0	0
AAEL008098	RNAinterference	RNAi	SRRP	PAZPIWI	high	PIWI2	aub	x	0	0	0	0	0	0.120218	x	0	0	0.120218	0	0
AAEL013692	RNAinterference	RNAi	SRRP	PAZPIWI	high	PIWI3	aub	x	0	0	0	0	0	0.116537	x	0.116537	0	0	0.0735532	0
AAEL009287	RNAinterference	RNAi	SRRP	Ran	high	-	Ran	x	74.1564	65.1707	85.454	52.9856	100	187.907	x	139.345	122.46	160.574	99.5636	187.907
AAEL009392	RNAinterference	RNAi	SRRP	RanBP21	high	-	Ranbp21	x	64.7517	79.1213	100	53.9272	97.7759	16.6616	x	10.7887	13.1829	16.6616	8.98515	16.2911
AAEL001657	RNAinterference	RNAi	SRRP	Rm62	high	-	CG10333	x	100	55.8392	71.1807	25.6698	83.5825	18.9014	x	18.9014	10.5544	13.4542	4.85195	15.7983
AAEL001769	RNAinterference	RNAi	SRRP	Rm62	high	-	mahe	x	100	94.2686	75.0021	58.1117	77.3566	47.4437	x	47.4437	44.7246	35.5838	27.5703	36.7008
AAEL002083	RNAinterference	RNAi	SRRP	Rm62	high	-	CG10077	x	100	58.7153	60.8782	46.8195	77.7838	559.49	x	559.49	328.506	340.608	261.951	435.193
AAEL008738	RNAinterference	RNAi	SRRP	Rm62	high	-	mahe	x	100	48.6974	42.7905	27.2777	59.3778	636.093	x	636.093	309.761	272.187	173.512	377.698
AAEL010402	RNAinterference	RNAi	SRRP	Rm62	high	-	CG7878	x	100	88.8419	47.834	38.8908	71.7459	16.1865	x	16.1865	14.3804	7.74266	6.29507	11.6132
AAEL013985	RNAinterference	RNAi	SRRP	Rm62	high	-	CG6227	x	100	90.8622	74.278	32.3202	61.5403	24.1262	x	24.1262	21.9216	17.9205	7.79763	14.8473
AAEL004472	RNAinterference	RNAi	SRRP	Rm62	high	-	bel	x	99.7239	79.6194	100	54.8435	93.7358	257.924	x	257.212	205.358	257.924	141.455	241.767
AAEL004978	RNAinterference	RNAi	SRRP	Rm62	high	-	vas	x	50.2942	66.3696	100	32.963	77.6	10.5079	x	5.28484	6.97402	10.5079	3.46371	8.15409
AAEL010787	RNAinterference	RNAi	SRRP	Rm62	high	-	Rm62	x	63.5236	42.2255	41.7965	64.6734	100	1781.41	x	1131.62	752.212	744.568	1152.1	1781.41
AAEL012962	RNAinterference	RNAi	SRRP	Rm62	high	-	CG5589	x	49.4207	35.4187	47.2988	49.044	100	12.9071	x	6.37877	4.57152	6.10489	6.33015	12.9071
AAEL002351	RNAinterference	RNAi	SRRP	Rm62	high	-	CG10077	x	96.1035	99.4024	78.9462	46.9942	100	8.47265	x	8.14252	8.42202	6.68884	3.98165	8.47265
AAEL001317	RNAinterference	RNAi	SRRP	Rm62	high	-	CG6418	x	86.0523	66.764	74.0191	42.9896	100	20.5246	x	17.6619	13.703	15.1921	8.82342	20.5246
AAEL023716	RNAinterference	RNAi	SRRP	Spindle_E	high	-	spn-E	x	68.4069	77.5704	78.2315	43.2649	100	19.7304	x	13.497	15.305	15.4354	8.53636	19.7304
AAEL008073	RNAinterference	RNAi	SRRP	VIG	high	-	FDY	x	100	55.9421	51.7655	41.603	91.8946	320.903	x	320.903	179.52	166.117	133.505	294.893
AAEL013434	Signal Transduction	Cytokin	SPZ	SPZ	high	-	spz	x	100	16.4289	1.94079	0.266517	74.5222	61.3471	x	61.3471	10.0786	1.19062	0.163501	45.7172
AAEL001435	Signal Transduction	Cytokin	SPZ	SPZ	high	SPZ2	NT1	x	100	7.47846	0	0	3.10083	11.3575	x	11.3575	0.849369	0	0	0.352178
AAEL001929	Signal Transduction	Cytokin	SPZ	SPZ	high	SPZ5	spz5	x	84.5351	36.3759	0	23.1749	100	1.00763	x	0.851803	0.366535	0	0.233517	1.00763
AAEL007897	Signal Transduction	Cytokin	SPZ	SPZ	high	SPZ4	spz4	x	47.1801	16.6488	2.03999	1.91919	100	15.0536	x	7.1023	2.50625	0.307092	0.288908	15.0536
AAEL008596	Signal Transduction	Cytokin	SPZ	SPZ	high	SPZ3A	spz3	x	20.6092	8.12969	1.58944	0.250239	100	29.3931	x	6.05769	2.38957	0.467186	0.0735532	29.3931
AAEL013433	Signal Transduction	Cytokin	SPZ	SPZ	high	SPZ1C	spz	x	0	0	0	0	0	0.381957	x	0.381957	0.360448	0.0934372	0	0.0944949
AAEL012164	Signal Transduction	Cytokin	SPZ	SPZ	high	SPZ6	spz6	x	0	0	0	0	0	0.177591	x	0.174482	0	0.120218	0	0.177591
AAEL021557	Signal Transduction	PathMod	IMDMOD	PIRK	high	pirk	pirk	x	11.3684	100	59.0228	35.7258	2.96553	143.44	x	16.3068	143.44	84.6625	51.2452	4.25376
AAEL014642	Signal Transduction	PathMod	IMDMOD	UBIQUI	high	ben	ben	x	100	68.9607	64.2936	36.4973	52.2538	88.2277	x	88.2277	60.8425	56.7248	32.2007	46.1023
AAEL003103	Signal Transduction	PathMod	IMDMOD	UBIQUI	high	eff	eff	x	100	64.2394	79.1419	44.3067	66.2238	181.645	x	181.645	116.688	143.758	80.481	120.293
AAEL023060	Signal Transduction	PathMod	IMDMOD	UBIQUI	high	-	scny	x	61.5401	99.8001	100	30.9502	54.1259	4.32359	x	2.66074	4.31495	4.32359	1.33816	2.34018
AAEL021793	Signal Transduction	PathMod	IMDMOD	UBIQUI	high	-	POSH	x	81.5911	99.3454	100	48.8674	95.3461	1.45167	x	1.18443	1.44217	1.45167	0.709393	1.38411
AAEL013253	Signal Transduction	PathMod	IMDMOD	UBIQUI	high	-	CYLD	x	84.4171	81.6316	100	41.1598	81.915	25.5312	x	21.5527	20.8415	25.5312	10.5086	20.9139
AAEL011873	Signal Transduction	PathMod	IMDMOD	UBIQUI	high	Uev1A	Uev1A	x	89.1756	65.5121	79.3494	45.3894	100	91.2392	x	81.3631	59.7727	72.3977	41.4129	91.2392
AAEL026694	Signal Transduction	PathMod	JASTMOD	PIAS	high	PIAS2	Su(var)2-10	x	100	77.5775	78.508	46.2201	83.1167	18.4718	x	18.4718	14.33	14.5019	8.5377	15.3532
AAEL015099	Signal Transduction	PathMod	JASTMOD	PIAS	high	PIAS1	Su(var)2-10	x	96.9396	49.5801	100	29.8745	12.7155	1.62942	x	1.57955	0.807866	1.62942	0.486781	0.207189
AAEL001919	Signal Transduction	PathMod	JASTMOD	PTP61F	high	-	Ptp61F	x	100	83.4599	62.2109	23.3142	76.7526	36.8061	x	36.8061	30.7183	22.8974	8.58104	28.2496
AAEL019728	Signal Transduction	PathMod	JASTMOD	SOCS	high	SOCS	Socs36E	x	100	82.7903	66.9147	27.6453	66.957	71.983	x	71.983	59.5949	48.1672	19.8999	48.1977
AAEL000255	Signal Transduction	PathMod	JASTMOD	SOCS	high	-	Socs44A	x	0	0	0	0	0	0.535419	x	0.535419	0.366535	0.421146	0.217123	0.187487
AAEL000709	Signal Transduction	PathMod	TOLLMOD	CACT	high	cact	cact	x	100	52.6568	46.5931	61.5175	44.0172	66.5262	x	66.5262	35.0306	30.9966	40.9253	29.283
AAEL013167	Signal Transduction	PathMod	TOLLMOD	CACTIN	high	-	cactin	x	96.0062	41.8757	60.768	37.3857	100	9.44132	x	9.06425	3.95363	5.7373	3.52971	9.44132
AAEL005339	Signal Transduction	PathMod	TOLLMOD	HRS	high	-	Hrs	x	93.6909	97.3567	100	40.4	83.5299	13.8984	x	13.0216	13.531	13.8984	5.61497	11.6093
AAEL018205	Signal Transduction	PathMod	TOLLMOD	MOP	high	-	mop	x	66.8266	68.5713	100	33.9384	84.2337	24.01	x	16.0451	16.464	24.01	8.14862	20.2245
AAEL021839	Signal Transduction	PathMod	TOLLMOD	PELLINO	high	-	Pli	x	100	81.6341	79.3935	31.6256	68.0378	19.8826	x	19.8826	16.231	15.7855	6.288	13.5277
AAEL003371	Signal Transduction	PathMod	TOLLMOD	UBIQUI	high	-	slmb	x	100	58.6446	65.2096	34.3287	55.2204	64.0588	x	64.0588	37.567	41.7725	21.9905	35.3736
AAEL027903	Signal Transduction	PathMod	TOLLMOD	UBIQUI	high	-	lwr	x	77.7066	100	54.9973	46.3473	43.0522	82.9779	x	64.4793	82.9779	45.6356	38.458	35.7238
AAEL025779	Signal Transduction	PathMod	TOLLMOD	UBIQUI	high	-	lwr	x	94.9941	39.2898	89.7223	48.5351	100	70.2831	x	66.7648	27.6141	63.0596	34.112	70.2831
AAEL022729	Signal Transduction	PathSig	IMDSIG	AKIRIN	high	-	akirin	x	100	52.3197	63.3857	35.4247	76.3953	126.847	x	126.847	66.366	80.403	44.9352	96.9052
AAEL027860	Signal Transduction	PathSig	IMDSIG	CASPAR	high	casp	casp	x	100	67.1471	90.464	43.8677	98.5556	79.8289	x	79.8289	53.6028	72.2165	35.0191	78.6759
AAEL010083	Signal Transduction	PathSig	IMDSIG	DEATH	high	IMD	imd	x	90.1297	100	83.0103	36.5055	84.2387	1.08756	x	0.980211	1.08756	0.902783	0.397018	0.916142
AAEL001932	Signal Transduction	PathSig	IMDSIG	DEATH	high	FADD	Fadd	x	54.0199	65.0116	63.571	38.3371	100	4.25795	x	2.30014	2.76816	2.70682	1.63237	4.25795
AAEL000590	Signal Transduction	PathSig	IMDSIG	DNR1	high	DNR1	dnr1	x	81.821	73.4738	100	16.7692	36.7077	76.0364	x	62.2138	55.8669	76.0364	12.7507	27.9112
AAEL014557	Signal Transduction	PathSig	IMDSIG	HOMEOBOX	high	cad	cad	x	6.42589	2.97747	5.75373	100	68.8381	16.0118	x	1.0289	0.476747	0.921277	16.0118	11.0222
AAEL003245	Signal Transduction	PathSig	IMDSIG	IKK	high	IKK1	IKKbeta	x	100	50.6661	53.1828	22.568	25.6698	12.4552	x	12.4552	6.31057	6.62404	2.81089	3.19723
AAEL012510	Signal Transduction	PathSig	IMDSIG	IKK	high	IKK2	key	x	89.5835	100	14.7362	19.8666	27.3584	15.1794	x	13.5982	15.1794	2.23686	3.01564	4.15284
AAEL023627	Signal Transduction	PathSig	IMDSIG	IKK	high	-	key	x	77.3909	21.0283	100	22.9325	66.127	14.8897	x	11.5233	3.13105	14.8897	3.41459	9.84612
AAEL005073	Signal Transduction	PathSig	IMDSIG	IKK	high	-	key	x	0	0	0	0	0	0.535199	x	0.137336	0	0.535199	0.308839	0
AAEL005079	Signal Transduction	PathSig	IMDSIG	IKK	high	-	key	x	0	0	0	0	0	0.581239	x	0.0908306	0.238436	0.581239	0.179895	0
AAEL018130	Signal Transduction	PathSig	IMDSIG	KINASE	high	TAK1	Tak1	x	100	46.3129	28.9632	23.7293	30.6587	12.4175	x	12.4175	5.7509	3.59651	2.94659	3.80704
AAEL007624	Signal Transduction	PathSig	IMDSIG	REL	high	REL2	Rel	x	51.4633	100	47.1993	35.9169	54.8354	23.8567	x	12.2774	23.8567	11.2602	8.56859	13.0819
AAEL026170	Signal Transduction	PathSig	IMDSIG	TAB2	high	tab2	Tab2	x	100	32.7133	43.9515	15.1843	27.0792	18.1069	x	18.1069	5.92336	7.95823	2.74939	4.9032
AAEL012471	Signal Transduction	PathSig	JASTSIG	DOME	high	DOME	dome	x	100	76.706	72.3692	22.0034	96.3767	21.9482	x	21.9482	16.8356	15.8837	4.82935	21.153
AAEL012553	Signal Transduction	PathSig	JASTSIG	HOP	high	HOP	hop	x	58.0745	71.5527	61.6462	23.193	100	12.0685	x	7.00874	8.63536	7.43979	2.79906	12.0685
AAEL020559	Signal Transduction	PathSig	JASTSIG	STAT	high	STAT	Stat92E	x	100	39.1652	49.9927	26.3476	43.9895	243.929	x	243.929	95.5351	121.947	64.2693	107.303
AAEL000200	Signal Transduction	PathSig	JASTSIG	VAGO	high	-	CG14132	x	22.4751	5.41935	0.962772	0.01371	100	2120.18	x	476.514	114.9	20.4125	0.290676	2120.18
AAEL026297	Signal Transduction	PathSig	TOLL	TOLL	high	-	Tl	x	100	35.9979	18.7261	0.504353	33.1364	28.4662	x	28.4662	10.2472	5.33061	0.14357	9.43267
AAEL004000	Signal Transduction	PathSig	TOLL	TOLL	high	TOLL10	Tollo	x	100	44.074	1.32133	0	15.5643	7.07146	x	7.07146	3.11668	0.0934372	0	1.10062
AAEL009551	Signal Transduction	PathSig	TOLL	TOLL	high	TOLL11	Toll-6	x	100	91.1476	24.3103	9.7898	48.6003	9.98455	x	9.98455	9.10068	2.42727	0.977467	4.85252
AAEL007619	Signal Transduction	PathSig	TOLL	TOLL	high	TOLL5A	Tl	x	100	17.3759	2.2137	0.506383	47.8124	14.5252	x	14.5252	2.52388	0.321544	0.0735532	6.94485
AAEL002583	Signal Transduction	PathSig	TOLL	TOLL	high	TOLL7	Toll-7	x	33.5288	100	25.8095	23.076	30.5446	8.26248	x	2.77031	8.26248	2.13251	1.90665	2.52374
AAEL013441	Signal Transduction	PathSig	TOLL	TOLL	high	TOLL9A	Toll-9	x	5.03404	58.8215	100	18.7884	6.6733	99.6622	x	5.01704	58.6228	99.6622	18.7249	6.65076
AAEL014896	Signal Transduction	PathSig	TOLL	TOLL	high	-	Toll-9	x	3.06589	2.8637	21.8263	100	3.81679	431.079	x	13.2164	12.3448	94.0887	431.079	16.4534
AAEL000633	Signal Transduction	PathSig	TOLL	TOLL	high	TOLL8	Tollo	x	6.68404	2.10282	1.64866	0	100	34.0047	x	2.27289	0.715058	0.560623	0	34.0047
AAEL027951	Signal Transduction	PathSig	TOLL	TOLL	high	-	Tl	x	0	0	0	0	0	0.0929924	x	0	0	0	0	0.0929924
AAEL000057	Signal Transduction	PathSig	TOLL	TOLL	high	TOLL5B	Tl	x	0	0	0	0	0	0.847777	x	0.847777	0	0.114053	0	0
AAEL000671	Signal Transduction	PathSig	TOLL	TOLL	high	TOLL6	Toll-6	x	0	0	0	0	0	0.533129	x	0.533129	0	0	0	0
AAEL007768	Signal Transduction	PathSig	TOLLSIG	DEATH	high	MYD	Myd88	x	100	65.0094	50.0901	27.4766	48.7596	10.3401	x	10.3401	6.72203	5.17937	2.84111	5.04179
AAEL006571	Signal Transduction	PathSig	TOLLSIG	DEATH	high	PELLE	pll	x	61.2381	80.4766	100	37.0575	84.3128	10.0093	x	6.12947	8.05511	10.0093	3.70918	8.43908
AAEL007642	Signal Transduction	PathSig	TOLLSIG	DEATH	high	TUBE	-	x	87.8324	83.2793	88.0746	68.1454	100	8.62326	x	7.57401	7.18139	7.5949	5.87635	8.62326
AAEL007696	Signal Transduction	PathSig	TOLLSIG	REL	high	REL1A	dl	x	100	34.307	25.332	14.521	41.3047	97.6706	x	97.6706	33.5078	24.7419	14.1827	40.3426
AAEL027765	Signal Transduction	PathSig	TOLLSIG	REL	high	-	dl	x	0	0	0	0	0	0	x	0	0	0	0	0
AAEL006930	Signal Transduction	PathSig	TOLLSIG	REL	high	REL1B	dl	x	0	0	0	0	0	0	x	0	0	0	0	0
AAEL028236	Signal Transduction	PathSig	TOLLSIG	TRAF	high	-	Traf-like	x	7.46273	50.8362	100	79.6806	8.04389	4.51991	x	0.337308	2.29775	4.51991	3.60149	0.363576
AAEL021581	Stress	CaspaseSig	BCL2	Bcl2	high	-	Buffy	x	44.9461	21.5078	33.3883	100	84.3798	58.7612	x	26.4108	12.6383	19.6194	58.7612	49.5826
AAEL001515	Stress	CaspaseSig	BCL2	Bcl2	high	DEBCL	Debcl	x	60.7705	16.7822	4.70871	7.78835	100	19.3036	x	11.7309	3.23957	0.908948	1.50343	19.3036
AAEL026744	Stress	CaspaseSig	CASP	Caspase	high	-	-	x	9.78035	49.6355	100	66.6031	3.65359	40.4699	x	3.9581	20.0874	40.4699	26.9542	1.4786
AAEL011562	Stress	CaspaseSig	CASP	CASPL	high	Dronc	Dronc	x	72.8124	100	99.7402	49.9606	65.5038	14.0067	x	10.1986	14.0067	13.9703	6.99781	9.1749
AAEL014148	Stress	CaspaseSig	CASP	CASPL	high	Dredd	Dredd	x	72.381	70.198	70.755	23.2242	100	4.61525	x	3.34057	3.23982	3.26552	1.07185	4.61525
AAEL003444	Stress	CaspaseSig	CASP	CASPS	high	CASPS19	Decay	x	5.67956	82.8305	100	39.4229	10.7458	19.0668	x	1.08291	15.7931	19.0668	7.5167	2.04888
AAEL017498	Stress	CaspaseSig	CASP	CASPS	high	CASPS21	Damm	x	7.91656	80.641	100	39.74	0	8.8832	x	0.703244	7.1635	8.8832	3.53019	0
AAEL005956	Stress	CaspaseSig	CASP	CASPS	high	CASPS16	Damm	x	4.82278	78.5367	100	42.9298	4.33153	20.9568	x	1.0107	16.4588	20.9568	8.9967	0.907749
AAEL014348	Stress	CaspaseSig	CASP	CASPS	high	CASPS8	-	x	86.5675	71.1623	100	37.0916	60.5298	8.0648	x	6.9815	5.7391	8.0648	2.99137	4.8816
AAEL005955	Stress	CaspaseSig	CASP	CASPS	high	CASPS17	Damm	x	11.7979	53.4455	100	80.6413	2.93611	9.21571	x	1.08726	4.92538	9.21571	7.43167	0.270584
AAEL003439	Stress	CaspaseSig	CASP	CASPS	high	CASPS18	Decay	x	6.12736	33.015	57.7296	100	2.14678	4.33172	x	0.26542	1.43012	2.50068	4.33172	0.0929924
AAEL012143	Stress	CaspaseSig	CASP	CASPS	high	CASPS7	Dcp-1	x	0	0	0	0	0	0.360613	x	0.360613	0.116174	0.207491	0.163501	0.0944949
AAEL000874	Stress	CaspaseSig	CASPA	ARK	high	ARK	Dark	x	63.9264	60.8367	67.9039	100	6.01345	2.95324	x	1.8879	1.79665	2.00536	2.95324	0.177591
AAEL006633	Stress	CaspaseSig	IAP	IAP	high	IAP2	Diap2	x	100	49.9112	81.008	46.2028	94.4217	7.7269	x	7.7269	3.85659	6.25941	3.57005	7.29587
AAEL012446	Stress	CaspaseSig	IAP	IAP	high	IAP6	Bruce	x	100	91.1898	97.5377	47.4348	72.3957	53.2859	x	53.2859	48.5913	51.9738	25.2761	38.5767
AAEL009074	Stress	CaspaseSig	IAP	IAP	high	IAP1	Diap1	x	39.0484	100	78.0177	48.6086	27.8973	67.6894	x	26.4317	67.6894	52.8098	32.9029	18.8835
AAEL001501	Stress	CaspaseSig	IAP	IAP	high	-	CIAPIN1	x	37.3443	65.028	100	35.787	52.3862	63.7207	x	23.7961	41.4363	63.7207	22.8038	33.3809
AAEL014251	Stress	CaspaseSig	IAP	IAP	high	IAP5	Det	x	0	0	0	0	0	0.83732	x	0.428679	0.83732	0.728238	0.147106	0.831543
AAEL014196	Stress	CaspaseSig	IAP ANTAGONIST	anti-IAP	high	-	-	x	100	16.8858	1.88243	2.95548	14.1887	17.7363	x	17.7363	2.99492	0.333873	0.524193	2.51655
AAEL004392	Stress	CaspaseSig	IAP ANTAGONIST	anti-IAP	high	IMP	-	x	37.4055	100	34.7732	10.8434	18.5743	2.03496	x	0.761188	2.03496	0.707622	0.22066	0.37798
AAEL013407	Stress	Ox-Stress	CAT	CAT	high	Cat	Cat	x	86.5239	76.3795	100	4.73411	18.0099	934.088	x	808.209	713.451	934.088	44.2207	168.229
AAEL027003	Stress	Ox-Stress	GST	GST_other	high	-	GstE11	x	81.3452	100	61.4906	1.54823	46.2906	239.062	x	194.466	239.062	147.001	3.70122	110.663
AAEL023692	Stress	Ox-Stress	GST	GST_other	high	-	GstE11	x	13.3507	89.0661	100	7.28885	81.77	35.1094	x	4.68735	31.2706	35.1094	2.55907	28.709
AAEL025929	Stress	Ox-Stress	GST	GST_other	high	-	GstT1	x	74.5542	67.6911	100	69.9515	95.5384	51.4606	x	38.3661	34.8343	51.4606	35.9975	49.1647
AAEL027519	Stress	Ox-Stress	GST	GST_other	high	-	GstE11	x	3.3251	52.7345	100	0.858404	11.8576	46.4231	x	1.54361	24.481	46.4231	0.398498	5.50465
AAEL024134	Stress	Ox-Stress	GST	GST_other	high	-	GstE11	x	3.3251	52.7345	100	0.858404	11.8576	46.4231	x	1.54361	24.481	46.4231	0.398498	5.50465
AAEL026530	Stress	Ox-Stress	GST	GST_other	high	-	GstD1	x	1.32677	48.2898	100	0	0	3.50519	x	0.0465059	1.69265	3.50519	0	0
AAEL024885	Stress	Ox-Stress	GST	GST_other	high	-	CG10428	x	67.1988	68.2497	85.0258	50.1238	100	29.903	x	20.0945	20.4087	25.4253	14.9885	29.903
AAEL007017	Stress	Ox-Stress	GST	GST_other	high	-	CG10428	x	0	0	0	0	0	0.525849	x	0.291497	0.334656	0.29831	0.101678	0.525849
AAEL007026	Stress	Ox-Stress	GST	GST_other	high	-	CG10428	x	0	0	0	0	0	0.238436	x	0.181661	0.238436	0.114053	0	0
AAEL025173	Stress	Ox-Stress	GST	GST_other	high	-	GstE11	x	0	0	0	0	0	0.186221	x	0	0.0407122	0.186221	0	0
AAEL020409	Stress	Ox-Stress	GST	GST_other	high	-	GstE11	x	0	0	0	0	0	0.186221	x	0	0.0407122	0.186221	0	0
AAEL022511	Stress	Ox-Stress	GST	GST_other	high	-	GstE11	x	0	0	0	0	0	1.42791e-05	x	1.04666e-07	1.42791e-05	1.05952e-05	0	5.63964e-07
AAEL001090	Stress	Ox-Stress	GST	GSTD	high	GSTD7	GstD11	x	100	13.0898	0	0	20.6789	1.82059	x	1.82059	0.238311	0	0	0.376477
AAEL001061	Stress	Ox-Stress	GST	GSTD	high	GSTD1	GstD1	x	86.712	79.7903	100	0.59814	58.7804	814.36	x	706.148	649.78	814.36	4.87102	478.684
AAEL010582	Stress	Ox-Stress	GST	GSTD	high	GSTD11	GstD1	x	2.77395	74.3199	100	70.2863	5.2404	49.5217	x	1.37371	36.8045	49.5217	34.807	2.59513
AAEL001054	Stress	Ox-Stress	GST	GSTD	high	GSTD4	-	x	0.379279	42.7407	100	0.785977	0.673258	27.6246	x	0.104774	11.8069	27.6246	0.217123	0.185985
AAEL010591	Stress	Ox-Stress	GST	GSTD	high	GSTD6	-	x	31.2254	70.0395	97.5098	100	9.74399	8.46319	x	2.64266	5.92757	8.25244	8.46319	0.824652
AAEL001071	Stress	Ox-Stress	GST	GSTD	high	GSTD5	GstD1	x	62.8935	39.45	61.4559	100	76.0745	2.15303	x	1.35411	0.849369	1.32316	2.15303	1.63791
AAEL001059	Stress	Ox-Stress	GST	GSTD	high	GSTD3	-	x	0	0	0	0	0	0.114053	x	0	0	0.114053	0.0717849	0
AAEL007951	Stress	Ox-Stress	GST	GSTE	high	GSTE2	GstE11	x	13.3507	89.0661	100	7.28884	81.77	35.1094	x	4.68735	31.2706	35.1094	2.55907	28.709
AAEL007962	Stress	Ox-Stress	GST	GSTE	high	GSTE4	GstE11	x	86.9111	85.6085	100	5.60755	78.4195	308.581	x	268.192	264.172	308.581	17.3039	241.988
AAEL007948	Stress	Ox-Stress	GST	GSTE	high	GSTE7	GstE11	x	3.3251	52.7345	100	0.858404	11.8576	46.4231	x	1.54361	24.481	46.4231	0.398498	5.50465
AAEL007946	Stress	Ox-Stress	GST	GSTE	high	GSTE6	GstE11	x	3.31568	44.2862	100	34.9643	7.15227	55.3383	x	1.83484	24.5073	55.3383	19.3487	3.95795
AAEL007947	Stress	Ox-Stress	GST	GSTE	high	GSTE3	GstE11	x	67.7747	80.8038	91.5343	6.90733	100	48.1181	x	32.6119	38.8812	44.0445	3.32367	48.1181
AAEL007954	Stress	Ox-Stress	GST	GSTE	high	GSTE1	GstE11	x	0	0	0	0	0	0.508418	x	0.32587	0.388999	0.508418	0.161732	0.448175
AAEL007964	Stress	Ox-Stress	GST	GSTE	high	GSTE5	GstE11	x	0	0	0	0	0	0.186221	x	0	0.0407122	0.186221	0	0
AAEL007955	Stress	Ox-Stress	GST	GSTE	high	GSTE8	GstE14	x	0	0	0	0	0	0.476872	x	0.344596	0.476872	0.120218	0	0.374975
AAEL011752	Stress	Ox-Stress	GST	GSTI	high	GSTI1	gfzf	x	100	78.1397	27.3285	20.1572	47.8147	7.03778	x	7.03778	5.4993	1.92332	1.41862	3.36509
AAEL017085	Stress	Ox-Stress	GST	GSTO	high	GSTO1	GstO1	x	80.0111	75.8923	67.4912	20.9504	100	27.5795	x	22.0667	20.9308	18.6138	5.77803	27.5795
AAEL011741	Stress	Ox-Stress	GST	GSTS	high	GSTS1	GstS1	x	11.5274	68.4952	100	10.5756	10.5666	688.259	x	79.3383	471.424	688.259	72.7878	72.7258
AAEL004229	Stress	Ox-Stress	GST	GSTT	high	GSTT4	GstT4	x	100	32.8201	1.56645	0.987528	38.4963	196.573	x	196.573	64.5154	3.07921	1.94121	75.6733
AAEL009017	Stress	Ox-Stress	GST	GSTT	high	GSTT1	GstT1	x	79.6335	59.2863	100	51.8269	80.4145	47.0145	x	37.4393	27.8732	47.0145	24.3661	37.8065
AAEL009016	Stress	Ox-Stress	GST	GSTT	high	GSTT2	GstT1	x	54.6795	74.4346	90.2315	64.2028	100	8.05479	x	4.40432	5.99555	7.26796	5.1714	8.05479
AAEL010500	Stress	Ox-Stress	GST	GSTX	high	GSTX2	-	x	100	28.4335	43.2392	2.88824	35.6672	30.6063	x	30.6063	8.70244	13.2339	0.883983	10.9164
AAEL000092	Stress	Ox-Stress	GST	GSTX	high	GSTX1	-	x	2.76798	16.4286	47.2012	100	11.0912	90.0256	x	2.49189	14.7899	42.4932	90.0256	9.98492
AAEL011934	Stress	Ox-Stress	GST	GSTZ	high	GSTZ1	GstZ2	x	75.3778	100	98.8208	18.445	36.3806	22.7663	x	17.1607	22.7663	22.4978	4.19924	8.28252
AAEL012069	Stress	Ox-Stress	PRDX	GPX	high	GPXH1	PHGPx	x	49.7217	85.7854	100	17.1256	32.4252	204.377	x	101.62	175.325	204.377	35.0007	66.2695
AAEL008397	Stress	Ox-Stress	PRDX	GPX	high	GPXH2	-	x	12.2266	3.66931	2.37514	0.3067	100	1036.75	x	126.76	38.0416	24.6243	3.17972	1036.75
AAEL000495	Stress	Ox-Stress	PRDX	GPX	high	GPXH3	-	x	0	0	0	0	0	0.116174	x	0.104774	0.116174	0	0	0
AAEL000342	Stress	Ox-Stress	PRDX	HPX	high	-	Pxn	x	100	48.1357	14.4554	3.59061	88.5693	16.6967	x	16.6967	8.0371	2.41359	0.599515	14.7882
AAEL019639	Stress	Ox-Stress	PRDX	HPX	high	-	CG42331	x	100	13.3638	1.14789	0	39.0644	8.13992	x	8.13992	1.08781	0.0934372	0	3.17982
AAEL000496	Stress	Ox-Stress	PRDX	HPX	high	-	-	x	3.95699	100	26.2067	0.209659	2.21181	420.786	x	16.6504	420.786	110.274	0.882215	9.30697
AAEL011941	Stress	Ox-Stress	PRDX	HPX	high	-	cd	x	87.6331	47.5873	99.4393	100	54.1675	1.00184	x	0.877942	0.476747	0.996221	1.00184	0.54267
AAEL006014	Stress	Ox-Stress	PRDX	HPX	high	HPX1	Pxd	x	50.5903	19.2206	9.79946	4.71673	100	1.90699	x	0.964751	0.366535	0.186874	0.0899474	1.90699
AAEL013171	Stress	Ox-Stress	PRDX	HPX	high	HPX2	Irc	x	42.8272	5.727	1.83477	0.286736	100	214.184	x	91.7289	12.2663	3.92979	0.614141	214.184
AAEL020747	Stress	Ox-Stress	PRDX	HPX	high	-	CG10211	x	23.295	2.58715	1.08717	0.252724	100	158.495	x	36.9213	4.10049	1.7231	0.400554	158.495
AAEL017467	Stress	Ox-Stress	PRDX	HPX	high	-	-	x	0	0	0	0	0	0.63758	x	0.63758	0	0	0	0
AAEL026038	Stress	Ox-Stress	PRDX	HPX	high	-	Pxt	x	0	0	0	0	0	0.940441	x	0.207152	0.482709	0.307092	0	0.940441
AAEL000507	Stress	Ox-Stress	PRDX	HPX	high	-	-	x	0	0	0	0	0	0.35368	x	0.0908306	0.238311	0	0.0735532	0.35368
AAEL002354	Stress	Ox-Stress	PRDX	HPX	high	HPX5	cysu	x	0	0	0	0	0	0.612197	x	0.612197	0	0.114053	0	0.270584
AAEL004388	Stress	Ox-Stress	PRDX	HPX	high	HPX8A	Pxt	x	0	0	0	0	0	0.594925	x	0.174482	0.244398	0.594925	0	0.472474
AAEL004390	Stress	Ox-Stress	PRDX	HPX	high	HPX8B	Pxt	x	0	0	0	0	0	0.360697	x	0	0.360697	0	0	0
AAEL004386	Stress	Ox-Stress	PRDX	HPX	high	pxt	Pxt	x	0	0	0	0	0	0.240436	x	0.195497	0	0.240436	0	0.18899
AAEL002309	Stress	Ox-Stress	PRDX	TPX	high	TPX4	Prx2540-1	x	100	42.8501	63.8366	0.381283	0.742953	2116	x	2116	906.707	1350.78	8.06794	15.7209
AAEL019408	Stress	Ox-Stress	PRDX	TPX	high	-	Jafrac1	x	99.8153	35.5387	17.9214	55.5943	100	80.4297	x	80.2811	28.5836	14.4142	44.7143	80.4297
AAEL007135	Stress	Ox-Stress	PRDX	TPX	high	-	Prx5	x	44.9953	100	11.2343	10.5803	26.3692	345.135	x	155.295	345.135	38.7736	36.5165	91.0094
AAEL009051	Stress	Ox-Stress	PRDX	TPX	high	TPX5	Prx6005	x	29.3445	81.2734	100	14.3861	63.0158	39.1626	x	11.4921	31.8288	39.1626	5.63399	24.6787
AAEL025567	Stress	Ox-Stress	PRDX	TPX	high	-	Jafrac2	x	33.3153	73.3454	71.1796	100	23.0151	91.0513	x	30.334	66.782	64.81	91.0513	20.9555
AAEL013528	Stress	Ox-Stress	PRDX	TPX	high	TPX1	Prx3	x	37.4506	38.3355	46.198	39.3119	100	77.5876	x	29.057	29.7436	35.8439	30.5011	77.5876
AAEL019759	Stress	Ox-Stress	SOD	SODCuZn	high	-	CG5948	x	100	65.5557	64.5215	40.4646	79.7618	1.65898	x	1.65898	1.08756	1.0704	0.6713	1.32323
AAEL006271	Stress	Ox-Stress	SOD	SODCuZn	high	CUSOD2	Sod3	x	83.8499	100	64.3582	2.22022	42.6648	30.7352	x	25.7714	30.7352	19.7806	0.682389	13.1131
AAEL019938	Stress	Ox-Stress	SOD	SODCuZn	high	CUSOD4	-	x	6.04806	52.3287	100	12.9208	9.98672	3.65564	x	0.221095	1.91295	3.65564	0.472339	0.365079
AAEL019937	Stress	Ox-Stress	SOD	SODCuZn	high	-	Sod1	x	40.0078	49.0654	100	10.8008	30.7683	1000.33	x	400.212	490.818	1000.33	108.044	307.786
AAEL019761	Stress	Ox-Stress	SOD	SODCuZn	high	-	CG5948	x	0	0	0	0	0	0	x	0	0	0	0	0
AAEL025388	Stress	Ox-Stress	SOD	SODMnFe	high	-	Sod2	x	22.5823	16.5846	16.2657	7.43544	100	247.472	x	55.8848	41.0421	40.253	18.4006	247.472
AAEL004823	Stress	Ox-Stress	SOD	SODMnFe	high	MNSOD1	Sod2	x	0	0	0	0	0	0	x	0	0	0	0	0
AAEL005108	Stress	Ox-Stress	SOD	SODMnFe	high	MNSOD2	Sod2	x	0	0	0	0	0	0.281982	x	0.0908306	0	0.120218	0.0899474	0.281982

## Sheet: BF Kinetic
Gene ID	SubClass	Superfamily	Family	Subfamily	Confidence	VB Symbol	Dmel Ortholog		Relative Expression				Max TPM		TPM
									UC	6 hr	24 hr	48 hr			SF	6 hr	24 hr	48 hr
AAEL010641	Autophagy	AutoPha	APHAG	Aphag_other	high	APG7A	Uba2	x	50.8453	100	41.8975	90.246	21.2807	x	10.8202	21.2807	8.91608	19.205
AAEL022443	Autophagy	AutoPha	APHAG	Aphag_other	high	-	Aduk	x	57.4399	55.8026	67.7122	100	6.13638	x	3.52473	3.42426	4.15507	6.13638
AAEL020638	Autophagy	AutoPha	APHAG	Aphag_other	high	-	Tor	x	82.2349	82.0328	53.848	100	6.96612	x	5.72858	5.71451	3.75112	6.96612
AAEL012306	Autophagy	AutoPha	APHAG	Aphag_other	high	APG7B	Uba3	x	43.103	83.8248	33.3405	100	13.4099	x	5.78008	11.2408	4.47093	13.4099
AAEL027731	Autophagy	AutoPha	APHAG	Atg	high	-	Atg14	x	100	33.084	99.3357	80.4737	7.02191	x	7.02191	2.32313	6.97526	5.65079
AAEL007228	Autophagy	AutoPha	APHAG	Atg	high	APG4B	Atg4a	x	52.3941	100	72.7762	35.1343	1.0344	x	0.541966	1.0344	0.7528	0.36343
AAEL021061	Autophagy	AutoPha	APHAG	Atg	high	-	Atg10	x	43.024	89.0079	100	76.5289	2.11702	x	0.910826	1.88431	2.11702	1.62013
AAEL018348	Autophagy	AutoPha	APHAG	Atg	high	-	Atg17	x	65.2494	45.898	100	80.5964	19.0897	x	12.4559	8.7618	19.0897	15.3856
AAEL023227	Autophagy	AutoPha	APHAG	Atg	high	-	Atg4a	x	52.5649	21.362	100	64.0843	4.75543	x	2.49969	1.01586	4.75543	3.04749
AAEL009105	Autophagy	AutoPha	APHAG	Atg	high	APG9	Atg9	x	50.0611	19.9738	100	58.49	32.0529	x	16.046	6.40218	32.0529	18.7477
AAEL007162	Autophagy	AutoPha	APHAG	Atg	high	APG8	Atg8a	x	32.0209	13.7485	100	33.6167	151.595	x	48.5421	20.842	151.595	50.9612
AAEL003777	Autophagy	AutoPha	APHAG	Atg	high	-	Atg2	x	43.9184	5.49231	100	72.3161	66.1911	x	29.0701	3.63542	66.1911	47.8668
AAEL013063	Autophagy	AutoPha	APHAG	Atg	high	APG18A	Atg18b	x	15.644	74.6067	100	15.6995	23.8142	x	3.7255	17.767	23.8142	3.73871
AAEL013995	Autophagy	AutoPha	APHAG	Atg	high	APG18B	Atg18a	x	61.7138	45.8008	100	94.4122	23.7277	x	14.6433	10.8675	23.7277	22.4019
AAEL010516	Autophagy	AutoPha	APHAG	Atg	high	APG4A	Atg4b	x	62.2806	79.7812	87.6164	100	4.19117	x	2.61029	3.34377	3.67215	4.19117
AAEL019922	Autophagy	AutoPha	APHAG	Atg	high	-	Atg1	x	64.7666	20.481	87.5713	100	8.61731	x	5.58114	1.76491	7.54628	8.61731
AAEL009814	Autophagy	AutoPha	APHAG	Atg	high	-	Atg7	x	62.2938	50.92	84.3275	100	3.8017	x	2.36822	1.93582	3.20587	3.8017
AAEL010427	Autophagy	AutoPha	APHAG	Atg	high	APG6	Atg6	x	55.3476	61.781	83.0078	100	4.75131	x	2.62973	2.93541	3.94396	4.75131
AAEL009089	Autophagy	AutoPha	APHAG	Atg	high	APG12	Atg12	x	66.2054	63.2365	82.3205	100	5.99755	x	3.9707	3.79264	4.93721	5.99755
AAEL000955	Autophagy	AutoPha	APHAG	Atg	high	APG3	Atg3	x	63.0287	79.3415	75.2577	100	20.9646	x	13.2137	16.6336	15.7775	20.9646
AAEL019779	Autophagy	AutoPha	APHAG	Atg	high	-	Atg16	x	81.9992	99.0504	72.0127	100	5.66027	x	4.64138	5.60652	4.07611	5.66027
AAEL002286	Autophagy	AutoPha	APHAG	Atg	high	APG5	Atg5	x	72.096	89.9693	62.1172	100	3.73326	x	2.69153	3.35879	2.319	3.73326
AAEL005985	Autophagy	AutoPha	APHAG	Atg	high	-	Atg13	x	62.8509	22.12	22.9042	100	269.438	x	169.344	59.5996	61.7127	269.438
AAEL003389	Effector Molecules	AntiMic	AMP	Attacin	high	ATT	AttA	x	32.4445	19.2869	20.4933	100	3.60159	x	1.16852	0.694636	0.738085	3.60159
AAEL027281	Effector Molecules	AntiMic	AMP	Attacin	high	-	AttA	x	0	0	0	0	0.0445524	x	0	0.0445524	0	0.0321694
AAEL004833	Effector Molecules	AntiMic	AMP	Attacin	high	DPT1	DptA	x	0	0	0	0	0.121946	x	0.0426228	0.121946	0	0.0881377
AAEL012805	Effector Molecules	AntiMic	AMP	Cathelicidin	high	-	Camp	x	0	0	0	0	0	x	0	0	0	0
AAEL024595	Effector Molecules	AntiMic	AMP	Cathelicidin	high	-	Camp	x	0	0	0	0	0.251403	x	0.161564	0.251403	0.123014	0.0975321
AAEL029046	Effector Molecules	AntiMic	AMP	Cecropin	high	CECD	-	x	56.5178	100	52.5837	90.8468	5.44702	x	3.07853	5.44702	2.86424	4.94844
AAEL029041	Effector Molecules	AntiMic	AMP	Cecropin	high	-	-	x	15.6705	100	58.1962	57.1425	22.6119	x	3.54338	22.6119	13.1593	12.921
AAEL029047	Effector Molecules	AntiMic	AMP	Cecropin	high	CECN	-	x	16.0258	76.1888	32.2018	100	37.2668	x	5.97229	28.3931	12.0006	37.2668
AAEL029044	Effector Molecules	AntiMic	AMP	Cecropin	high	CECE	-	x	12.2936	69.5133	17.7737	100	4.8448	x	0.595598	3.36778	0.861099	4.8448
AAEL029038	Effector Molecules	AntiMic	AMP	Cecropin	high	CECA	-	x	17.1558	10.0113	11.8214	100	24.1653	x	4.14574	2.41925	2.85668	24.1653
AAEL003832	Effector Molecules	AntiMic	AMP	Defensin	high	DEFC	Def	x	24.2093	100	61.7418	59.1749	28.7418	x	6.95817	28.7418	17.7457	17.0079
AAEL003857	Effector Molecules	AntiMic	AMP	Defensin	high	DEFD	Def	x	9.86772	21.9207	100	59.9497	62.7484	x	6.19183	13.7549	62.7484	37.6174
AAEL003841	Effector Molecules	AntiMic	AMP	Defensin	high	DEFA	Def	x	11.4926	17.3757	100	17.6803	111	x	12.7873	19.3331	111.265	19.672
AAEL004522	Effector Molecules	AntiMic	AMP	Gambicin	high	GAM1	-	x	51.5766	68.747	68.4039	100	3688.9	x	1902.61	2536.01	2523.35	3688.9
AAEL017536	Effector Molecules	AntiMic	AMP	Holotricin	high	GRRP	-	x	14.8084	100	30.986	56.1346	18.8201	x	2.78696	18.8201	5.83159	10.5646
AAEL003723	Effector Molecules	AntiMic	LYS	LYSC	high	LYSC11	-	x	19.3873	100	64.679	64.4178	123.885	x	24.018	123.885	80.1277	79.8041
AAEL017132	Effector Molecules	AntiMic	LYS	LYSC	high	LYSC4	CG11159	x	22.8106	100	56.842	43.1692	51.7569	x	11.806	51.7569	29.4196	22.343
AAEL015404	Effector Molecules	AntiMic	LYS	LYSC	high	LYSC7B	CG11159	x	76.7104	81.5025	51.6497	100	175.537	x	134.655	143.067	90.6644	175.537
AAEL003712	Effector Molecules	AntiMic	LYS	LYSC	high	LYSC10	-	x	0	0	0	0	0.751976	x	0.296836	0.412333	0.751976	0.350646
AAEL025888	Effector Molecules	AntiMic	LYS	LYSI	high	-	CG6421	x	42.2563	100	32.9913	71.7593	3.59517	x	1.51918	3.59517	1.18609	2.57987
AAEL001485	Effector Molecules	AntiMic	LYS	LYSI	high	-	CG14823	x	0	0	0	0	0.940063	x	0.205323	0.75421	0.940063	0.72403
AAEL019435	Effector Molecules	AntiMic	LYS	LYSlong	high	LYSC6	CG8492	x	0	0	0	0	0.409839	x	0.162164	0.409839	0	0.0724682
AAEL009745	Effector Molecules	EffEnzy	NO	NOS	high	-	Nos	x	0	0	0	0	0.645457	x	0.545732	0.295404	0.246028	0.645457
AAEL013492	Effector Molecules	EffEnzy	PPO	PPO	high	PPO5	PPO1	x	18.6127	38.7645	100	18.5849	8.65178	x	1.61033	3.35382	8.65178	1.60792
AAEL011763	Effector Molecules	EffEnzy	PPO	PPO	high	PPO3	PPO1	x	29.2699	9.3807	100	6.77341	1.29997	x	0.3805	0.121946	1.29997	0.0880523
AAEL015116	Effector Molecules	EffEnzy	PPO	PPO	high	-	PPO1	x	0	0	0	0	0.365839	x	0.290441	0.365839	0.123014	0
AAEL015113	Effector Molecules	EffEnzy	PPO	PPO	high	-	PPO1	x	0	0	0	0	0	x	0	0	0	0
AAEL020579	Effector Molecules	EffEnzy	PPO	PPO	high	-	PPO1	x	0	0	0	0	0	x	0	0	0	0
AAEL011764	Effector Molecules	EffEnzy	PPO	PPO	high	PPO10	PPO1	x	0	0	0	0	0.121946	x	0	0.121946	0	0
AAEL013501	Effector Molecules	EffEnzy	PPO	PPO	high	PPO4	PPO1	x	0	0	0	0	0.201978	x	0	0	0.201978	0.0880523
AAEL014544	Effector Molecules	EffEnzy	PPO	PPO	high	PPO6	PPO2	x	0	0	0	0	0.201978	x	0	0	0.201978	0
AAEL013493	Effector Molecules	EffEnzy	PPO	PPO	high	PPO7	PPO1	x	0	0	0	0	0	x	0	0	0	0
AAEL013496	Effector Molecules	EffEnzy	PPO	PPO	high	PPO8	PPO1	x	0	0	0	0	0.129457	x	0.121466	0.129457	0.123014	0
AAEL007563	Effector Molecules	EffEnzy	PRDX	DUOX	high	DUOX	Duox	x	0	0	0	0	0.448007	x	0.356344	0	0.448007	0.232989
AAEL002039	Effector Molecules	EffEnzy	PRDX	NOX	high	-	Nox	x	0	0	0	0	0.324992	x	0.120771	0.287893	0.324992	0.0880523
AAEL027984	Modulation	CascMod	CLIP	atypicalCLIP	low	-	-		7.14811	20.6237	100	34.8292	7.66786		0.548107	1.5814	7.66786	2.67065
AAEL018159	Modulation	CascMod	CLIP	CLIP_other	high	-	scaf	x	42.4157	100	20.0414	64.053	5.69842	x	2.41702	5.69842	1.14204	3.65001
AAEL015465	Modulation	CascMod	CLIP	CLIP_other	high	-	CG9737	x	65.892	100	60.4621	89.3202	1.27848	x	0.842419	1.27848	0.772999	1.14195
AAEL019853	Modulation	CascMod	CLIP	CLIP_other	high	-	Hayan	x	65.4286	100	66.2613	89.8167	1.16659	x	0.763285	1.16659	0.772999	1.04779
AAEL024669	Modulation	CascMod	CLIP	CLIP_other	high	-	-	x	38.4968	87.0794	100	78.005	1.6341	x	0.629076	1.42296	1.6341	1.27468
AAEL003279	Modulation	CascMod	CLIP	CLIP_other	high	-	grass	x	74.9448	85.8465	100	54.428	1.75711	x	1.31686	1.50842	1.75711	0.956361
AAEL002600	Modulation	CascMod	CLIP	CLIP_other	high	-	CG5390	x	44.6212	77.0708	100	95.0057	15.6013	x	6.96148	12.024	15.6013	14.8221
AAEL019781	Modulation	CascMod	CLIP	CLIP_other	high	-	-	x	41.5941	31.8666	100	67.6345	8.37084	x	3.48178	2.6675	8.37084	5.66158
AAEL002629	Modulation	CascMod	CLIP	CLIP_other	high	-	CG5390	x	52.5638	74.1996	100	77.4684	5.74512	x	3.01985	4.26286	5.74512	4.45066
AAEL022578	Modulation	CascMod	CLIP	CLIP_other	high	-	CG9737	x	41.5778	58.2836	89.6353	100	16.4632	x	6.84501	9.59532	14.7568	16.4632
AAEL019767	Modulation	CascMod	CLIP	CLIP_other	high	-	Sp7	x	75.1961	86.1459	87.7382	100	25.4911	x	19.1683	21.9595	22.3654	25.4911
AAEL002595	Modulation	CascMod	CLIP	CLIP_other	high	-	CG5390	x	76.3059	66.8872	63.0442	100	13.3212	x	10.1649	8.91019	8.39825	13.3212
AAEL002593	Modulation	CascMod	CLIP	CLIP_other	high	-	CG40160	x	61.7673	75.256	61.2062	100	7.31963	x	4.52114	5.50846	4.48007	7.31963
AAEL002128	Modulation	CascMod	CLIP	CLIP_other	high	-	CG32260	x	0	0	0	0	0	x	0	0	0	0
AAEL002288	Modulation	CascMod	CLIP	CLIP_other	high	-	-	x	0	0	0	0	0.246028	x	0.204322	0.165946	0.246028	0.0975321
AAEL002577	Modulation	CascMod	CLIP	CLIP_other	high	-	-	x	0	0	0	0	0.165946	x	0	0.165946	0	0
AAEL019768	Modulation	CascMod	CLIP	CLIP_other	high	-	CG11313	x	0	0	0	0	0.632597	x	0.113742	0.624753	0.123014	0.632597
AAEL026876	Modulation	CascMod	CLIP	CLIP_other	high	-	Hayan	x	0	0	0	0	0.76974	x	0	0.76974	0	0
AAEL026937	Modulation	CascMod	CLIP	CLIP_other	high	-	-	x	0	0	0	0	0.0775331	x	0.0775331	0	0	0
AAEL015637	Modulation	CascMod	CLIP	CLIP_other	high	-	Sp7	x	0	0	0	0	0.577	x	0.577	0.331893	0.246028	0.336625
AAEL017003	Modulation	CascMod	CLIP	CLIP_other	high	-	grass	x	0	0	0	0	0.902858	x	0.703094	0.575786	0.492057	0.902858
AAEL025028	Modulation	CascMod	CLIP	CLIP_other	high	-	grass	x	0	0	0	0	0.971668	x	0.358571	0.971668	0	0.17
AAEL002632	Modulation	CascMod	CLIP	CLIP_other	high	-	-	x	0	0	0	0	0.153779	x	0.153779	0.129457	0.123014	0.0975321
AAEL002590	Modulation	CascMod	CLIP	CLIPA	high	-	-	x	83.4604	100	61.8243	93.6377	1.12259	x	0.93692	1.12259	0.694035	1.05117
AAEL002301	Modulation	CascMod	CLIP	CLIPA	high	-	-	x	22.8618	100	92.042	50.3559	2.48157	x	0.567331	2.48157	2.28408	1.24961
AAEL020706	Modulation	CascMod	CLIP	CLIPA	high	-	CG9377	x	34.7863	0	100	47.4276	1.22101	x	0.424743	0	1.22101	0.579094
AAEL002580	Modulation	CascMod	CLIP	CLIPA	high	-	CG9377	x	40.1432	89.8599	74.3035	100	2.19922	x	0.882837	1.97622	1.6341	2.19922
AAEL002601	Modulation	CascMod	CLIP	CLIPA	high	CLIPA1	CG9377	x	42.7344	57.3565	39.9568	100	1.42909	x	0.610715	0.819678	0.571021	1.42909
AAEL022775	Modulation	CascMod	CLIP	CLIPA	high	-	CG9377	x	0	0	0	0	0.33232	x	0	0	0	0.33232
AAEL001675	Modulation	CascMod	CLIP	CLIPA	high	CLIPA10	CG4998	x	0	0	0	0	0.785732	x	0.0413241	0.785732	0.123014	0
AAEL002126	Modulation	CascMod	CLIP	CLIPA	high	CLIPA15	mas	x	0	0	0	0	0	x	0	0	0	0
AAEL008404	Modulation	CascMod	CLIP	CLIPA	high	CLIPA16	CG9377	x	0	0	0	0	0.546807	x	0.46117	0.546807	0.526971	0.46963
AAEL007006	Modulation	CascMod	CLIP	CLIPA	high	CLIPA17	-	x	0	0	0	0	0.492057	x	0.28256	0.251403	0.492057	0.0975321
AAEL005718	Modulation	CascMod	CLIP	CLIPA	high	CLIPA3	CG13318	x	0	0	0	0	0.246028	x	0	0.129457	0.246028	0.0724682
AAEL002624	Modulation	CascMod	CLIP	CLIPA	high	-	-	x	0	0	0	0	0.295404	x	0.0425503	0.295404	0	0.16052
AAEL014354	Modulation	CascMod	CLIP	CLIPB	high	CLIPB43	-	x	90.1592	100	86.9187	88.2175	1.22307	x	1.10271	1.22307	1.06308	1.07896
AAEL000038	Modulation	CascMod	CLIP	CLIPB	high	CLIPB6	-	x	78.1942	100	89.3165	76.5788	32.2482	x	25.2162	32.2482	28.8029	24.6953
AAEL003243	Modulation	CascMod	CLIP	CLIPB	high	CLIPB13A	grass	x	73.9772	100	62.5214	86.7138	2.07924	x	1.53816	2.07924	1.29997	1.80299
AAEL007993	Modulation	CascMod	CLIP	CLIPB	high	CLIPB27	-	x	45.806	100	35.0378	67.8916	156.128	x	71.5162	156.128	54.7039	105.998
AAEL008668	Modulation	CascMod	CLIP	CLIPB	high	CLIPB22	-	x	33.8469	100	73.7095	42.3785	3.52728	x	1.19387	3.52728	2.59994	1.49481
AAEL005093	Modulation	CascMod	CLIP	CLIPB	high	CLIPB46	-	x	42.3055	95.9265	100	74.2699	4.00628	x	1.69488	3.84308	4.00628	2.97546
AAEL007992	Modulation	CascMod	CLIP	CLIPB	high	-	-	x	17.7542	88.4984	100	30.4229	21.0654	x	3.74001	18.6426	21.0654	6.40872
AAEL006674	Modulation	CascMod	CLIP	CLIPB	high	CLIPB29	-	x	9.46096	74.9018	100	25.1327	2.09124	x	0.197852	1.56638	2.09124	0.525585
AAEL000099	Modulation	CascMod	CLIP	CLIPB	high	CLIPB33	-	x	2.76618	53.4168	100	13.8762	3.94396	x	0.109097	2.10674	3.94396	0.547273
AAEL014349	Modulation	CascMod	CLIP	CLIPB	high	CLIPB15	-	x	55.9012	52.7744	100	63.0251	1.82694	x	1.02128	0.964157	1.82694	1.15143
AAEL000037	Modulation	CascMod	CLIP	CLIPB	high	CLIPB35	-	x	38.7917	40.8739	100	78.5146	1.23014	x	0.477193	0.502807	1.23014	0.965841
AAEL006161	Modulation	CascMod	CLIP	CLIPB	high	CLIPB31	-	x	17.3422	14.3124	100	22.919	3.17096	x	0.549915	0.453839	3.17096	0.726753
AAEL000028	Modulation	CascMod	CLIP	CLIPB	high	CLIPB34	-	x	51.9506	60.2704	80.5932	100	33.4924	x	17.3995	20.186	26.9926	33.4924
AAEL005064	Modulation	CascMod	CLIP	CLIPB	high	CLIPB5	CG3505	x	63.5026	93.8937	80.3511	100	27.755	x	17.6252	26.0602	22.3015	27.755
AAEL000074	Modulation	CascMod	CLIP	CLIPB	high	CLIPB1	ea	x	45.4795	67.7539	67.8176	100	7.03379	x	3.19893	4.76567	4.77014	7.03379
AAEL001084	Modulation	CascMod	CLIP	CLIPB	high	CLIPB21	-	x	66.9646	82.2139	47.5281	100	1.46026	x	0.977859	1.20054	0.694035	1.46026
AAEL001077	Modulation	CascMod	CLIP	CLIPB	high	CLIPB45	-	x	58.2653	63.4028	46.8848	100	99.4834	x	57.9642	63.0752	46.6426	99.4834
AAEL003253	Modulation	CascMod	CLIP	CLIPB	high	CLIPB13B	grass	x	0	0	0	0	0.123014	x	0	0	0.123014	0
AAEL005648	Modulation	CascMod	CLIP	CLIPB	high	CLIPB16	CG17572	x	0	0	0	0	0.125955	x	0.125955	0.121946	0	0
AAEL015430	Modulation	CascMod	CLIP	CLIPB	high	CLIPB19	-	x	0	0	0	0	0.697732	x	0.16012	0.697732	0	0.267532
AAEL014137	Modulation	CascMod	CLIP	CLIPB	high	CLIPB25	-	x	0	0	0	0	0.492057	x	0.314107	0.409839	0.492057	0.176105
AAEL013245	Modulation	CascMod	CLIP	CLIPB	high	CLIPB28	-	x	0	0	0	0	0.872823	x	0.872823	0.79821	0.403957	0.677278
AAEL000760	Modulation	CascMod	CLIP	CLIPB	high	CLIPB30	-	x	0	0	0	0	0.896013	x	0.350098	0.295404	0.896013	0.805326
AAEL005431	Modulation	CascMod	CLIP	CLIPB	high	CLIPB37	-	x	0	0	0	0	0.940063	x	0.0425503	0.121946	0.940063	0.17
AAEL003628	Modulation	CascMod	CLIP	CLIPB	high	CLIPB38	-	x	0	0	0	0	0.403957	x	0.158363	0	0.403957	0.336625
AAEL003632	Modulation	CascMod	CLIP	CLIPB	high	CLIPB39	CG9737	x	0	0	0	0	0.500521	x	0.326704	0	0	0.500521
AAEL003631	Modulation	CascMod	CLIP	CLIPB	high	CLIPB41	CG9737	x	0	0	0	0	0	x	0	0	0	0
AAEL006168	Modulation	CascMod	CLIP	CLIPB	high	CLIPB42	-	x	0	0	0	0	0.571021	x	0	0	0.571021	0.0724682
AAEL005060	Modulation	CascMod	CLIP	CLIPB	high	CLIPB44	CG34409	x	0	0	0	0	0	x	0	0	0	0
AAEL014139	Modulation	CascMod	CLIP	CLIPB	high	-	-	x	0	0	0	0	0.123014	x	0.0838743	0	0.123014	0
AAEL011991	Modulation	CascMod	CLIP	CLIPC	high	CLIPC1	snk	x	100	72.6674	88.808	98.7788	3.11572	x	3.11572	2.26411	2.767	3.07767
AAEL012712	Modulation	CascMod	CLIP	CLIPC	high	CLIPC13	Hayan	x	64.8884	100	16.1051	69.328	7.0912	x	4.60137	7.0912	1.14204	4.91619
AAEL004524	Modulation	CascMod	CLIP	CLIPC	high	CLIPC5B	Hayan	x	52.5907	100	44.3445	60.563	2.19864	x	1.15628	2.19864	0.974977	1.33156
AAEL007593	Modulation	CascMod	CLIP	CLIPC	high	CLIPC2	snk	x	59.3767	88.241	69.599	100	27.8295	x	16.5242	24.557	19.369	27.8295
AAEL007597	Modulation	CascMod	CLIP	CLIPC	high	CLIPC3	snk	x	62.9185	64.1137	64.7523	100	10.486	x	6.59763	6.72296	6.78993	10.486
AAEL012713	Modulation	CascMod	CLIP	CLIPC	high	CLIPC16	Hayan	x	79.3202	60.8239	60.8513	100	16.9033	x	13.4077	10.2812	10.2859	16.9033
AAEL011593	Modulation	CascMod	CLIP	CLIPC	high	CLIPC11	snk	x	0	0	0	0	0	x	0	0	0	0
AAEL012711	Modulation	CascMod	CLIP	CLIPC	high	CLIPC12	-	x	0	0	0	0	0.38086	x	0.0743321	0.38086	0.201978	0.361689
AAEL014350	Modulation	CascMod	CLIP	CLIPC	high	-	-	x	0	0	0	0	0.129457	x	0.0727313	0.129457	0	0
AAEL002124	Modulation	CascMod	CLIP	CLIPD	high	CLIPD6	CG7432	x	67.6871	100	98.8788	90.5689	57.342	x	38.8132	57.342	56.6991	51.9341
AAEL004979	Modulation	CascMod	CLIP	CLIPD	high	CLIPD2	l(2)k05911	x	70.1194	23.9079	49.4091	100	3.30728	x	2.31904	0.7907	1.6341	3.30728
AAEL019590	Modulation	CascMod	CLIP	CLIPD	high	-	-	x	45.3567	64.6052	26.554	100	1.22389	x	0.555118	0.7907	0.324992	1.22389
AAEL025309	Modulation	CascMod	CLIP	CLIPD	high	-	-	x	0	0	0	0	0.0789159	x	0.0789159	0	0	0
AAEL007796	Modulation	CascMod	CLIP	CLIPD	high	CLIPD1	CG9372	x	0	0	0	0	0.728949	x	0.122832	0.243893	0.728949	0.160521
AAEL015109	Modulation	CascMod	CLIP	CLIPD	high	CLIPD10	CG8170	x	0	0	0	0	0.615064	x	0.615064	0.409839	0.123014	0.510001
AAEL011375	Modulation	CascMod	CLIP	CLIPD	high	-	-	x	0	0	0	0	0.0727313	x	0.0727313	0	0	0
AAEL002997	Modulation	CascMod	CLIP	CLIPD	high	CLIPD3	CG7432	x	0	0	0	0	0.217405	x	0	0	0	0.217405
AAEL000224	Modulation	CascMod	CLIP	CLIPD	high	-	CG13744	x	0	0	0	0	0	x	0	0	0	0
AAEL005906	Modulation	CascMod	CLIP	CLIPD	high	-	Sb	x	0	0	0	0	0.201978	x	0	0	0.201978	0
AAEL000238	Modulation	CascMod	CLIP	CLIPD	high	CLIPD9	CG8172	x	0	0	0	0	0.324992	x	0.036209	0.287893	0.324992	0.232989
AAEL001233	Modulation	CascMod	CLIP	CLIPE	high	CLIPE9	-	x	100	42.5482	41.5758	57.8709	1.26749	x	1.26749	0.539296	0.526971	0.73351
AAEL018347	Modulation	CascMod	CLIP	CLIPE	high	CLIPE12	-	x	49.8821	100	48.9308	81.8093	1.67965	x	0.837842	1.67965	0.821864	1.37411
AAEL005792	Modulation	CascMod	CLIP	CLIPE	high	CLIPE8	-	x	63.9931	100	20.6474	70.2493	9.27496	x	5.93533	9.27496	1.91504	6.5156
AAEL004995	Modulation	CascMod	DREP	DREP	high	-	Drep4	x	63.6944	15.6918	51.5479	100	3.76508	x	2.39815	0.590807	1.94082	3.76508
AAEL006265	Modulation	CascMod	DREP	DREP	high	-	Drep2	x	0	0	0	0	0.235739	x	0.235739	0	0.123014	0.0880523
AAEL014825	Modulation	CascMod	DREP	DREP	high	-	Drep1	x	0	0	0	0	0.280333	x	0.280333	0	0.201978	0.176105
AAEL023229	Modulation	CascMod	initiator SP	ModSP	high	-	modSP	x	0	0	0	0	0.831746	x	0.831746	0.739189	0.246028	0.771434
AAEL013936	Modulation	CascMod	SRPN	SRPN	high	SRPN4	Spn28Dc	x	100	77.7012	77.0226	97.4964	6.92268	x	6.92268	5.379	5.33203	6.74936
AAEL010769	Modulation	CascMod	SRPN	SRPN	high	SRPN6	Spn28Dc	x	96.9731	100	56.7551	57.7603	2.72398	x	2.64153	2.72398	1.546	1.57338
AAEL014078	Modulation	CascMod	SRPN	SRPN	high	-	Spn27A	x	82.3025	100	52.2663	97.2763	11.6631	x	9.59907	11.6631	6.09589	11.3455
AAEL008364	Modulation	CascMod	SRPN	SRPN	high	SRPN9	Spn88Ea	x	82.0062	100	67.6969	98.1507	11.5352	x	9.45955	11.5352	7.80895	11.3218
AAEL002704	Modulation	CascMod	SRPN	SRPN	high	SRPN23	-	x	49.8538	100	30.2965	0	1.2181	x	0.607271	1.2181	0.369043	0
AAEL007765	Modulation	CascMod	SRPN	SRPN	high	SRPN10	Spn55B	x	38.3904	100	73.2546	36.745	244.528	x	93.8753	244.528	179.128	89.8517
AAEL014141	Modulation	CascMod	SRPN	SRPN	high	SRPN5	Spn28Dc	x	24.5361	100	49.3733	54.9334	1.15654	x	0.283769	1.15654	0.571021	0.635326
AAEL002731	Modulation	CascMod	SRPN	SRPN	high	SRPN14	-	x	6.5526	100	0	0	1.10757	x	0.0725747	1.10757	0	0
AAEL007420	Modulation	CascMod	SRPN	SRPN	high	SRPN25	-	x	57.5263	27.184	100	62.3734	5.2622	x	3.02715	1.43047	5.2622	3.28222
AAEL020823	Modulation	CascMod	SRPN	SRPN	high	-	-	x	80.409	97.7367	92.2948	100	10.9933	x	8.83958	10.7445	10.1462	10.9933
AAEL028034	Modulation	CascMod	SRPN	SRPN	high	-	Spn77Ba	x	77.7844	77.8429	64.6618	100	5.5897	x	4.34791	4.35118	3.6144	5.5897
AAEL011777	Modulation	CascMod	SRPN	SRPN	high	SRPN8	Spn77Ba	x	77.7844	77.8429	64.6618	100	5.5897	x	4.34791	4.35118	3.6144	5.5897
AAEL014138	Modulation	CascMod	SRPN	SRPN	high	SRPN16	Spn28Dc	x	70.4588	92.1846	57.8084	100	4.78651	x	3.37252	4.41242	2.767	4.78651
AAEL002720	Modulation	CascMod	SRPN	SRPN	high	SRPN20	-	x	37.6289	37.383	55.2186	100	11.1028	x	4.17786	4.15055	6.13081	11.1028
AAEL003697	Modulation	CascMod	SRPN	SRPN	high	SRPN17	-	x	66.1764	36.1106	34.244	100	6.67003	x	4.41398	2.40859	2.28408	6.67003
AAEL024006	Modulation	CascMod	SRPN	SRPN	high	-	-	x	0	0	0	0	0	x	0	0	0	0
AAEL014079	Modulation	CascMod	SRPN	SRPN	high	-	Spn27A	x	0	0	0	0	0.807913	x	0.281804	0.75421	0.807913	0.402989
AAEL027145	Modulation	CascMod	SRPN	SRPN	high	-	CG43366	x	0	0	0	0	0.749243	x	0.282247	0.749243	0	0.258053
AAEL003653	Modulation	CascMod	SRPN	SRPN	high	SRPN12	Spn100A	x	0	0	0	0	0	x	0	0	0	0
AAEL006137	Modulation	CascMod	SRPN	SRPN	high	SRPN19	Spn85F	x	0	0	0	0	0.393509	x	0.116882	0	0	0.393509
AAEL002730	Modulation	CascMod	SRPN	SRPN	high	SRPN21	-	x	0	0	0	0	0.330521	x	0.0789159	0.243893	0.123014	0.330521
AAEL017249	Modulation	CascMod	SRPN	SRPN	high	SRPN24	Spn42Da	x	0	0	0	0	0	x	0	0	0	0
AAEL003182	Modulation	CascMod	SRPN	SRPN	high	SRPN26	-	x	0	0	0	0	0.935178	x	0.168113	0.935178	0.123014	0.507277
AAEL005665	Modulation	CascMod	SRPN	SRPN	high	SRPN3	-	x	0	0	0	0	0.734911	x	0.734911	0.619786	0.571021	0.619742
AAEL002699	Modulation	CascMod	SRPN	SRPN	high	SRPN7	-	x	0	0	0	0	0.121946	x	0.0425503	0.121946	0	0
AAEL004196	Recognition	ClasRec	GALE	GALE	high	GALE3	Pex23	x	66.1643	100	95.6789	87.3446	6.22524	x	4.11888	6.22524	5.95624	5.43741
AAEL005293	Recognition	ClasRec	GALE	GALE	high	GALE8A	-	x	62.8926	100	51.8656	65.9874	465.071	x	292.495	465.071	241.212	306.889
AAEL009850	Recognition	ClasRec	GALE	GALE	high	GALE14	-	x	54.5171	100	31.0322	55.4395	14.4663	x	7.88659	14.4663	4.4892	8.02001
AAEL012003	Recognition	ClasRec	GALE	GALE	high	GALE6B	-	x	23.7106	100	18.3259	49.8105	2.01377	x	0.477477	2.01377	0.369043	1.00307
AAEL026564	Recognition	ClasRec	GALE	GALE	high	-	galectin	x	32.3929	15.1077	100	46.7904	17.1313	x	5.54933	2.58814	17.1313	8.01581
AAEL003844	Recognition	ClasRec	GALE	GALE	high	GALE5	-	x	77.4003	58.0856	42.0171	100	132.088	x	102.237	76.7241	55.4996	132.088
AAEL003541	Recognition	ClasRec	GALE	GALE	high	GALE1	galectin	x	87.6793	13.3614	34.7645	100	27.51	x	24.1206	3.67571	9.56373	27.51
AAEL009842	Recognition	ClasRec	GALE	GALE	high	GALE12	-	x	38.9166	32.8372	32.2955	100	173.543	x	67.5369	56.9867	56.0465	173.543
AAEL012135	Recognition	ClasRec	GALE	GALE	high	GALE2	CG5335	x	66.6027	47.0009	19.6997	100	82.094	x	54.6768	38.585	16.1723	82.094
AAEL003840	Recognition	ClasRec	GALE	GALE	high	GALE11	-	x	0	0	0	0	0.0880523	x	0	0	0	0.0880523
AAEL007626	Recognition	ClasRec	GNBP	GNBPA	high	GNBPA1	GNBP1	x	27.0829	41.298	34.0321	100	2.03935	x	0.552316	0.84221	0.694035	2.03935
AAEL000652	Recognition	ClasRec	GNBP	GNBPA	high	GNBPA2	GNBP1	x	0	0	0	0	0	x	0	0	0	0
AAEL010270	Recognition	ClasRec	GNBP	GNBPB	high	-	-	x	10.3947	100	69.6992	28.556	1.92831	x	0.200443	1.92831	1.34402	0.550649
AAEL007064	Recognition	ClasRec	GNBP	GNBPB	high	GNBPB6	-	x	0	100	3.967	0	3.10094	x	0	3.10094	0.123014	0
AAEL022879	Recognition	ClasRec	GNBP	GNBPB	high	-	-	x	0	0	100	0.732791	13.3097	x	0	0	13.3097	0.0975321
AAEL003889	Recognition	ClasRec	GNBP	GNBPB	high	GNBPB1	-	x	53.8431	74.6155	72.6552	100	8.4508	x	4.55017	6.30561	6.13994	8.4508
AAEL009176	Recognition	ClasRec	GNBP	GNBPB	high	GNBPB3	-	x	0	0	0	0	0	x	0	0	0	0
AAEL009178	Recognition	ClasRec	GNBP	GNBPB	high	GNBPB4	-	x	0	0	0	0	0	x	0	0	0	0
AAEL003894	Recognition	ClasRec	GNBP	GNBPB	high	GNBPB5	-	x	0	0	0	0	0	x	0	0	0	0
AAEL012007	Recognition	ClasRec	PGRP	atypicalPGRP	high	-	-	x	84.6346	85.066	81.7529	100	57.2076	x	48.4175	48.6643	46.7689	57.2076
AAEL021026	Recognition	ClasRec	PGRP	PGRPL	high	-	PGRP-LA	x	100	60.0996	74.2084	87.7004	4.10728	x	4.10728	2.46846	3.04795	3.6021
AAEL027982	Recognition	ClasRec	PGRP	PGRPL	high	PGRP-LE	PGRP-LE	x	100	16.9025	69.1323	90.5149	37.4454	x	37.4454	6.3292	25.8868	33.8936
AAEL014640	Recognition	ClasRec	PGRP	PGRPL	high	PGRPLC	PGRP-LF	x	33.9789	100	31.4998	39.5812	346.362	x	117.69	346.362	109.103	137.094
AAEL010171	Recognition	ClasRec	PGRP	PGRPL	high	PGRPLB	PGRP-LB	x	49.8051	31.5263	100	76.5812	321.725	x	160.236	101.428	321.725	246.381
AAEL019745	Recognition	ClasRec	PGRP	PGRPL	high	-	PGRP-LD	x	81.5093	64.3264	78.2491	100	8.49885	x	6.92735	5.46701	6.65027	8.49885
AAEL012380	Recognition	ClasRec	PGRP	PGRPL	high	PGRPLA	PGRP-LA	x	0	0	0	0	0.856171	x	0.856171	0.431524	0	0.805832
AAEL017056	Recognition	ClasRec	PGRP	PGRPS	high	PGRPS4	PGRP-SC1a	x	3.88014	10.6461	100	3.02729	134.448	x	5.21679	14.3135	134.448	4.07015
AAEL007039	Recognition	ClasRec	PGRP	PGRPS	high	PGRP-SC1	PGRP-SC1a	x	4.16817	10.6172	100	3.01691	60.6106	x	2.52636	6.43515	60.6106	1.82857
AAEL009474	Recognition	ClasRec	PGRP	PGRPS	high	PGRPS1	PGRP-SA	x	6.70923	6.98647	100	10.893	402.1	x	26.9778	28.0926	402.1	43.8007
AAEL011551	Recognition	ClasRec	PGRP	PGRPS	high	-	CG9380	x	77.9002	92.3842	52.9244	100	361.911	x	281.929	334.349	191.539	361.911
AAEL019858	Recognition	ClasRec	SCR	SCR_other	high	-	CG42339	x	0	0	0	0	0.121946	x	0.0425503	0.121946	0	0
AAEL001914	Recognition	ClasRec	SCR	SCRA	high	-	bark	x	73.2424	41.3911	36.0639	100	22.7017	x	16.6273	9.39649	8.18713	22.7017
AAEL027694	Recognition	ClasRec	SCR	SCRA	high	-	-	x	58.9583	45.7981	19.7784	100	5.15222	x	3.03766	2.35962	1.01903	5.15222
AAEL022263	Recognition	ClasRec	SCR	SCRA	high	-	Loxl2	x	0	0	0	0	0.121946	x	0.036209	0.121946	0	0.0975321
AAEL023587	Recognition	ClasRec	SCR	SCRA	high	-	teq	x	0	0	0	0	0.272308	x	0.272308	0.121946	0.246028	0.248573
AAEL009192	Recognition	ClasRec	SCR	SCRA	high	SCRASP1	teq	x	0	0	0	0	0.295404	x	0.161205	0.295404	0	0.217405
AAEL010655	Recognition	ClasRec	SCR	SCRA	high	SCRASP2	Corin	x	0	0	0	0	0	x	0	0	0	0
AAEL009420	Recognition	ClasRec	SCR	SCRB	high	SCRBQ1	crq	x	100	24.4792	62.0828	88.6471	40.4138	x	40.4138	9.89297	25.09	35.8256
AAEL008370	Recognition	ClasRec	SCR	SCRB	high	SCRB17	pes	x	21.3534	100	30.4773	18.6714	56.985	x	12.1682	56.985	17.3675	10.6399
AAEL009423	Recognition	ClasRec	SCR	SCRB	high	SCRBQ2	crq	x	53.1383	59.2488	100	39.9678	24.0876	x	12.7998	14.2716	24.0876	9.62729
AAEL000234	Recognition	ClasRec	SCR	SCRB	high	SCRB7	CG2736	x	61.0092	42.8098	100	83.0851	30.635	x	18.6902	13.1148	30.635	25.4531
AAEL000227	Recognition	ClasRec	SCR	SCRB	high	SCRB8	CG3829	x	24.3483	41.6833	100	20.1023	61.3753	x	14.9438	25.5832	61.3753	12.3378
AAEL009432	Recognition	ClasRec	SCR	SCRB	high	SCRBQ3	crq	x	21.2632	29.9149	100	22.49	440.702	x	93.7074	131.836	440.702	99.1141
AAEL011222	Recognition	ClasRec	SCR	SCRB	high	SCRB5	CG40006	x	93.6829	63.4327	71.9751	100	6.26028	x	5.86481	3.97106	4.50584	6.26028
AAEL000256	Recognition	ClasRec	SCR	SCRB	high	SCRB9	emp	x	68.4073	23.1151	69.7823	100	7.71717	x	5.27911	1.78384	5.38522	7.71717
AAEL019436	Recognition	ClasRec	SCR	SCRB	high	-	Snmp2	x	61.4713	74.5756	65.1637	100	7.66976	x	4.7147	5.71977	4.9979	7.66976
AAEL027927	Recognition	ClasRec	SCR	SCRB	high	-	pes	x	62.1875	16.6768	35.6307	100	17.8503	x	11.1007	2.97686	6.36019	17.8503
AAEL005374	Recognition	ClasRec	SCR	SCRB	high	SCRB1	Snmp1	x	0	0	0	0	0.0880523	x	0	0	0	0.0880523
AAEL005979	Recognition	ClasRec	SCR	SCRB	high	SCRB3	dsb	x	0	0	0	0	0.930927	x	0.497818	0.583296	0.930927	0.774158
AAEL002741	Recognition	ClasRec	SCR	SCRB	high	SCRB6	CG10345	x	0	0	0	0	0.858119	x	0.858119	0.676264	0.694035	0.84325
AAEL006355	Recognition	ClasRec	SCR	SCRC	high	SCRC1	Sr-CI	x	0	0	0	0	0.649985	x	0	0	0.649985	0.232989
AAEL006361	Recognition	ClasRec	SCR	SCRC	high	SCRC2	Sr-CI	x	0	0	0	0	0	x	0	0	0	0
AAEL011622	Recognition	OtheRec	CTL	atypicalLECTIN	low	-	-	x	36.2176	27.6208	63.7833	100	4.62871	x	1.6764	1.27848	2.95234	4.62871
AAEL019726	Recognition	OtheRec	CTL	atypicalLECTIN	low	-	Mp	x	56.8934	19.6031	60.2742	100	2.56494	x	1.45928	0.502807	1.546	2.56494
AAEL025598	Recognition	OtheRec	CTL	atypicalLECTIN	low	-	-	x	0	0	0	0	0.615071	x	0	0	0.615071	0
AAEL005482	Recognition	OtheRec	CTL	CTL	high	CTL18	-	x	100	47.1459	43.1853	70.2661	4.06877	x	4.06877	1.91826	1.75711	2.85897
AAEL009338	Recognition	OtheRec	CTL	CTL	high	CTL10	CG13587	x	80.7564	100	79.2078	73.0129	21.8919	x	17.6791	21.8919	17.3401	15.9839
AAEL026955	Recognition	OtheRec	CTL	CTL	high	-	-	x	8.96051	78.2566	100	32.9228	10.4014	x	0.932018	8.13977	10.4014	3.42443
AAEL014382	Recognition	OtheRec	CTL	CTL	high	CTLMA14	-	x	19.3992	14.4942	100	62.5682	37.3382	x	7.2433	5.41189	37.3382	23.3619
AAEL018207	Recognition	OtheRec	CTL	CTL	high	CTL8	nw	x	73.856	14.8187	93.9332	100	1.64585	x	1.21556	0.243893	1.546	1.64585
AAEL022136	Recognition	OtheRec	CTL	CTL	high	-	rgn	x	71.4993	53.3075	13.513	100	71.8925	x	51.4027	38.3242	9.71486	71.8925
AAEL018265	Recognition	OtheRec	CTL	CTL	high	CTL9	CG14866	x	60.8965	19.139	5.5415	100	4.43974	x	2.70365	0.849721	0.246028	4.43974
AAEL006825	Recognition	OtheRec	CTL	CTL	high	-	CG15765	x	0	0	0	0	0	x	0	0	0	0
AAEL029068	Recognition	OtheRec	CTL	CTL	high	-	-	x	0	0	0	0	0.144936	x	0.0851005	0	0	0.144936
AAEL014384	Recognition	OtheRec	CTL	CTL	high	-	-	x	0	0	0	0	0	x	0	0	0	0
AAEL008299	Recognition	OtheRec	CTL	CTL	high	CTL11	-	x	0	0	0	0	0.0880523	x	0	0	0	0.0880523
AAEL019633	Recognition	OtheRec	CTL	CTL	high	-	-	x	0	0	0	0	0.369043	x	0.183429	0.165946	0.369043	0.0975321
AAEL013853	Recognition	OtheRec	CTL	CTLGA	high	CTLGA2	CG4115	x	83.9923	100	71.912	74.8671	2.78555	x	2.33964	2.78555	2.00314	2.08546
AAEL008681	Recognition	OtheRec	CTL	CTLGA	high	CTL12	-	x	63.7355	26.684	59.3111	100	13.0764	x	8.33433	3.48931	7.75577	13.0764
AAEL011070	Recognition	OtheRec	CTL	CTLGA	high	CTLGA3	Clect27	x	98.7753	86.1564	41.4496	100	13.1607	x	12.9995	11.3388	5.45504	13.1607
AAEL011078	Recognition	OtheRec	CTL	CTLGA	high	CTLGA1	CG6055	x	0	0	0	0	0.295404	x	0.152699	0.295404	0.201978	0.283117
AAEL011453	Recognition	OtheRec	CTL	CTLMA	high	CTL14	lectin-37Da	x	100	84.2732	12.5848	49.4175	1.60493	x	1.60493	1.35253	0.201978	0.793117
AAEL002524	Recognition	OtheRec	CTL	CTLMA	high	CTL24	lectin-37Da	x	53.1202	100	31.877	87.63	3.19674	x	1.69812	3.19674	1.01903	2.80131
AAEL011408	Recognition	OtheRec	CTL	CTLMA	high	CTL21	lectin-37Da	x	27.0409	98.8768	100	94.0195	1.05394	x	0.284995	1.0421	1.05394	0.99091
AAEL000543	Recognition	OtheRec	CTL	CTLMA	high	CTLMA11	lectin-37Da	x	21.8344	58.0548	100	41.6255	3.41699	x	0.74608	1.98373	3.41699	1.42234
AAEL005641	Recognition	OtheRec	CTL	CTLMA	high	CTLGA5	lectin-37Da	x	17.4053	29.5096	100	23.7515	75.2093	x	13.0904	22.194	75.2093	17.8634
AAEL011407	Recognition	OtheRec	CTL	CTLMA	high	CTL20	lectin-37Da	x	10.378	19.301	100	22.2608	2.64399	x	0.274393	0.510318	2.64399	0.588573
AAEL022823	Recognition	OtheRec	CTL	CTLMA	high	-	lectin-37Da	x	0	0	0	0	0	x	0	0	0	0
AAEL029020	Recognition	OtheRec	CTL	CTLMA	high	-	lectin-33A	x	0	0	0	0	0.492057	x	0.036209	0.287893	0.492057	0
AAEL029053	Recognition	OtheRec	CTL	CTLMA	high	-	lectin-33A	x	0	0	0	0	0	x	0	0	0	0
AAEL023353	Recognition	OtheRec	CTL	CTLMA	high	-	lectin-37Da	x	0	0	0	0	0.605935	x	0.119014	0.243893	0.605935	0.176105
AAEL025802	Recognition	OtheRec	CTL	CTLMA	high	-	-	x	0	0	0	0	0	x	0	0	0	0
AAEL027215	Recognition	OtheRec	CTL	CTLMA	high	-	lectin-37Da	x	0	0	0	0	0.195064	x	0.0425503	0	0	0.195064
AAEL027443	Recognition	OtheRec	CTL	CTLMA	high	-	lectin-37Da	x	0	0	0	0	0	x	0	0	0	0
AAEL029039	Recognition	OtheRec	CTL	CTLMA	high	-	lectin-33A	x	0	0	0	0	0.571021	x	0.0762461	0.251403	0.571021	0.0724682
AAEL029058	Recognition	OtheRec	CTL	CTLMA	high	-	lectin-33A	x	0	0	0	0	0.668753	x	0.157971	0.668753	0	0.0880523
AAEL012353	Recognition	OtheRec	CTL	CTLMA	high	CTL15	lectin-37Da	x	0	0	0	0	0.817049	x	0.0826481	0.251403	0.817049	0.330521
AAEL000533	Recognition	OtheRec	CTL	CTLMA	high	CTL16	lectin-37Da	x	0	0	0	0	0.369043	x	0	0.121946	0.369043	0
AAEL011404	Recognition	OtheRec	CTL	CTLMA	high	CTL19	lectin-37Da	x	0	0	0	0	0.123014	x	0.0794471	0	0.123014	0
AAEL000556	Recognition	OtheRec	CTL	CTLMA	high	CTL25	lectin-37Da	x	0	0	0	0	0.627296	x	0	0.627296	0	0
AAEL009209	Recognition	OtheRec	CTL	CTLMA	high	CTLGA6	lectin-37Da	x	0	0	0	0	0	x	0	0	0	0
AAEL011079	Recognition	OtheRec	CTL	CTLMA	high	CTLMA10	lectin-37Da	x	0	0	0	0	0	x	0	0	0	0
AAEL011455	Recognition	OtheRec	CTL	CTLMA	high	CTLMA12	lectin-37Da	x	0	0	0	0	0.144936	x	0.0727313	0	0	0.144936
AAEL011621	Recognition	OtheRec	CTL	CTLMA	high	CTLMA13	-	x	0	0	0	0	0.232989	x	0.153013	0	0.201978	0.232989
AAEL000283	Recognition	OtheRec	CTL	CTLMA	high	CTLMA16	lectin-37Da	x	0	0	0	0	0.123014	x	0	0	0.123014	0
AAEL011612	Recognition	OtheRec	CTL	CTLMA	high	CTLMA6	tfc	x	0	0	0	0	0.123014	x	0.0776897	0	0.123014	0.0975321
AAEL000563	Recognition	OtheRec	CTL	CTLMA	high	mosGCTL-1	lectin-37Da	x	0	0	0	0	0	x	0	0	0	0
AAEL014357	Recognition	OtheRec	CTL	CTLSE	high	-	CG9095	x	0	0	0	0	0.336625	x	0.164016	0	0	0.336625
AAEL021200	Recognition	OtheRec	CTL	CTLSE	high	-	fw	x	0	0	0	0	0.924767	x	0.924767	0.121946	0.856675	0.763412
AAEL007942	Recognition	OtheRec	FREP	FREP	high	-	CG30280	x	63.0715	97.269	100	81.6783	180.199	x	113.654	175.278	180.199	147.184
AAEL019868	Recognition	OtheRec	FREP	FREP	high	-	CG30280	x	42.8104	89.4734	100	85.4023	5.06936	x	2.17021	4.53573	5.06936	4.32935
AAEL006691	Recognition	OtheRec	FREP	FREP	high	-	CG1791	x	60.389	73.3976	100	90.0709	319.095	x	192.698	234.208	319.095	287.411
AAEL006702	Recognition	OtheRec	FREP	FREP	high	-	CG1791	x	60.729	57.9655	100	69.8996	277.915	x	168.775	161.095	277.915	194.261
AAEL011007	Recognition	OtheRec	FREP	FREP	high	-	CG30280	x	55.953	43.5325	100	57.3539	423.273	x	236.834	184.261	423.273	242.763
AAEL028145	Recognition	OtheRec	FREP	FREP	high	-	CG1791	x	59.9981	43.0287	100	87.3793	245.27	x	147.157	105.536	245.27	214.315
AAEL006699	Recognition	OtheRec	FREP	FREP	high	-	CG1791	x	66.7614	54.96	82.7369	100	433.85	x	289.644	238.444	358.954	433.85
AAEL006704	Recognition	OtheRec	FREP	FREP	high	-	-	x	68.196	44.1527	66.5403	100	4039.99	x	2755.11	1783.76	2688.22	4039.99
AAEL011009	Recognition	OtheRec	FREP	FREP	high	-	CG30280	x	78.3517	58.0957	8.28733	100	17.7021	x	13.8699	10.2842	1.46703	17.7021
AAEL000508	Recognition	OtheRec	FREP	FREP	high	-	CG9593	x	0	0	0	0	0.778566	x	0.778566	0.129457	0.728949	0.708121
AAEL003294	Recognition	OtheRec	FREP	FREP	high	-	CG30280	x	0	0	0	0	0.123014	x	0.0363656	0	0.123014	0
AAEL009384	Recognition	OtheRec	FREP	FREP	high	-	CG30280	x	0	0	0	0	0.571021	x	0.358728	0	0.571021	0.481561
AAEL009723	Recognition	OtheRec	FREP	FREP	high	-	CG41520	x	0	0	0	0	0.295404	x	0.130382	0.295404	0	0.232989
AAEL014773	Recognition	OtheRec	FREP	FREP	high	-	sca	x	0	0	0	0	0.0724682	x	0	0	0	0.0724682
AAEL025744	Recognition	OtheRec	FREP	FREP	high	-	CG30280	x	0	0	0	0	0.201978	x	0.160338	0.121946	0.201978	0.0880523
AAEL014432	Recognition	OtheRec	FREP	FREP	high	-	CG30280	x	0	0	0	0	0	x	0	0	0	0
AAEL021180	Recognition	OtheRec	FREP	FREP	high	-	CG30280	x	0	0	0	0	0.649985	x	0.289276	0.365839	0.649985	0.459221
AAEL025451	Recognition	OtheRec	FREP	FREP	high	-	-	x	0	0	0	0	0.0744887	x	0.0744887	0	0	0.0724682
AAEL023956	Recognition	OtheRec	FREP	FREP	high	-	CG9593	x	0	0	0	0	0.284179	x	0.284179	0.251403	0	0.191362
AAEL011634	Recognition	OtheRec	FREP	FREP	high	-	CG30280	x	0	0	0	0	0	x	0	0	0	0
AAEL011633	Recognition	OtheRec	FREP	FREP	high	-	CG30280	x	0	0	0	0	0.654285	x	0.396016	0.165946	0.448007	0.654285
AAEL001713	Recognition	OtheRec	FREP	FREP	high	-	-	x	0	0	0	0	0	x	0	0	0	0
AAEL000726	Recognition	OtheRec	FREP	FREP	high	-	-	x	0	0	0	0	0.258914	x	0.038123	0.258914	0.123014	0
AAEL000749	Recognition	OtheRec	FREP	FREP	high	-	-	x	0	0	0	0	0.663786	x	0	0.663786	0	0
AAEL008104	Recognition	OtheRec	FREP	FREP	high	-	CG30280	x	0	0	0	0	0.0363656	x	0.0363656	0	0	0
AAEL013417	Recognition	OtheRec	FREP	FREP	high	-	CG30280	x	0	0	0	0	0.370227	x	0.364398	0.287893	0.370227	0
AAEL013506	Recognition	OtheRec	FREP	FREP	high	-	CG30280	x	0	0	0	0	0.165946	x	0.036209	0.165946	0	0
AAEL002713	Recognition	OtheRec	FREP	FREP	high	-	CG30280	x	0	0	0	0	0.0975321	x	0	0	0	0.0975321
AAEL010117	Recognition	OtheRec	FREP	FREP	high	-	CG30280	x	0	0	0	0	0.403957	x	0.038123	0	0.403957	0
AAEL024532	Recognition	OtheRec	LRIM	atypicalLRR	low	-	-	x	100	28.4952	98.2974	94.9963	1.03668	x	1.03668	0.295404	1.01903	0.984806
AAEL014027	Recognition	OtheRec	LRIM	atypicalLRR	low	-	-	x	48.7523	100	67.0428	52.3073	6.38113	x	3.11095	6.38113	4.27809	3.3378
AAEL002819	Recognition	OtheRec	LRIM	atypicalLRR	low	-	CG11807	x	33.7775	100	90.6468	56.4436	8.479	x	2.86399	8.479	7.68594	4.78586
AAEL001766	Recognition	OtheRec	LRIM	atypicalLRR	high	-	-	x	93.6876	72.9341	100	88.9351	1.546	x	1.44841	1.12756	1.546	1.37493
AAEL008398	Recognition	OtheRec	LRIM	atypicalLRR	high	-	Lrrk	x	39.3556	64.5421	100	58.1621	11.1212	x	4.37682	7.17786	11.1212	6.46832
AAEL027836	Recognition	OtheRec	LRIM	atypicalLRR	low	-	CG9003	x	18.7887	28.5483	100	17.0184	48.3756	x	9.08914	13.8104	48.3756	8.23274
AAEL005221	Recognition	OtheRec	LRIM	atypicalLRR	low	-	CG32687	x	15.6559	23.292	100	21.6286	665.27	x	104.154	154.955	665.27	143.888
AAEL024346	Recognition	OtheRec	LRIM	atypicalLRR	high	-	LRR	x	83.5921	56.5997	100	94.5812	14.0902	x	11.7783	7.97501	14.0902	13.3267
AAEL007778	Recognition	OtheRec	LRIM	atypicalLRR	low	-	CG4950	x	17.4069	38.3761	100	33.1733	25.9237	x	4.51252	9.9485	25.9237	8.59975
AAEL023577	Recognition	OtheRec	LRIM	atypicalLRR	low	-	-	x	12.1838	15.063	100	27.1488	1.66901	x	0.203348	0.251403	1.66901	0.453117
AAEL003331	Recognition	OtheRec	LRIM	atypicalLRR	high	-	conv	x	73.8945	95.9278	72.868	100	1.56728	x	1.15813	1.50345	1.14204	1.56728
AAEL027361	Recognition	OtheRec	LRIM	atypicalLRR	low	-	CG3040	x	52.2143	67.3881	60.8458	100	7.4504	x	3.89017	5.02068	4.53325	7.4504
AAEL000668	Recognition	OtheRec	LRIM	atypicalLRR	low	-	CG8852	x	38.9264	0	55.2699	100	1.25572	x	0.488806	0	0.694035	1.25572
AAEL005762	Recognition	OtheRec	LRIM	atypicalLRR	low	-	CG18095	x	96.4418	95.9608	52.6839	100	19.3566	x	18.6678	18.5747	10.1978	19.3566
AAEL021071	Recognition	OtheRec	LRIM	atypicalLRR	low	-	CG8852	x	66.0264	42.2101	26.2802	100	11.6326	x	7.68061	4.91014	3.05708	11.6326
AAEL025368	Recognition	OtheRec	LRIM	atypicalLRR	high	-	LRR	x	0	0	0	0	0.0862957	x	0.0862957	0	0	0
AAEL003111	Recognition	OtheRec	LRIM	atypicalLRR	high	-	Fili	x	0	0	0	0	0.993135	x	0.321988	0.993135	0.369043	0.371169
AAEL003115	Recognition	OtheRec	LRIM	atypicalLRR	high	-	Fili	x	0	0	0	0	0.670521	x	0.365304	0.295404	0.246028	0.670521
AAEL015019	Recognition	OtheRec	LRIM	atypicalLRR	high	-	-	x	0	0	0	0	0	x	0	0	0	0
AAEL008365	Recognition	OtheRec	LRIM	atypicalLRR	low	-	-	x	0	0	0	0	0.940063	x	0.159041	0.121946	0.940063	0.17
AAEL012722	Recognition	OtheRec	LRIM	atypicalLRR	low	-	-	x	0	0	0	0	0.760559	x	0.0816315	0	0.760559	0
AAEL012724	Recognition	OtheRec	LRIM	atypicalLRR	low	-	-	x	0	0	0	0	0.123014	x	0.0802814	0	0.123014	0
AAEL024539	Recognition	OtheRec	LRIM	atypicalLRR	low	-	CG9003	x	0	0	0	0	0	x	0	0	0	0
AAEL024654	Recognition	OtheRec	LRIM	atypicalLRR	low	-	-	x	0	0	0	0	0.243893	x	0.137633	0.243893	0	0
AAEL027849	Recognition	OtheRec	LRIM	atypicalLRR	low	-	-	x	0	0	0	0	0.491041	x	0.247029	0	0.201978	0.491041
AAEL003408	Recognition	OtheRec	LRIM	atypicalLRR	low	-	atk	x	0	0	0	0	0.201978	x	0.0425503	0	0.201978	0
AAEL007127	Recognition	OtheRec	LRIM	atypicalLRR	low	-	CG13708	x	0	0	0	0	0.850001	x	0.644585	0.165946	0.324992	0.850001
AAEL007785	Recognition	OtheRec	LRIM	atypicalLRR	low	-	CG4950	x	0	0	0	0	0.0363656	x	0.0363656	0	0	0
AAEL010232	Recognition	OtheRec	LRIM	atypicalLRR	low	-	-	x	0	0	0	0	0.121946	x	0.0413241	0.121946	0	0
AAEL010808	Recognition	OtheRec	LRIM	atypicalLRR	low	-	Lrr47	x	0	0	0	0	0.279673	x	0.279673	0	0.123014	0.258053
AAEL012412	Recognition	OtheRec	LRIM	atypicalLRR	low	-	CG14762	x	0	0	0	0	0.960394	x	0.435869	0	0.123014	0.960394
AAEL012726	Recognition	OtheRec	LRIM	atypicalLRR	low	-	-	x	0	0	0	0	0.129457	x	0.086466	0.129457	0	0.0724682
AAEL000387	Recognition	OtheRec	LRIM	atypicalLRR	low	-	CG8852	x	0	0	0	0	0.412469	x	0.038123	0	0	0.412469
AAEL000650	Recognition	OtheRec	LRIM	atypicalLRR	low	-	CG8852	x	0	0	0	0	0.991562	x	0.11757	0.424861	0.861099	0.991562
AAEL012634	Recognition	OtheRec	LRIM	atypicalLRR	low	-	-	x	0	0	0	0	0.506625	x	0.345524	0	0.201978	0.506625
AAEL021586	Recognition	OtheRec	LRIM	atypicalLRR	low	-	-	x	0	0	0	0	0.203113	x	0.203113	0	0	0.0975321
AAEL023798	Recognition	OtheRec	LRIM	atypicalLRR	low	-	-	x	0	0	0	0	0	x	0	0	0	0
AAEL026478	Recognition	OtheRec	LRIM	atypicalLRR	low	-	-	x	0	0	0	0	0.925198	x	0.509888	0	0.246028	0.925198
AAEL027202	Recognition	OtheRec	LRIM	atypicalLRR	low	-	-	x	0	0	0	0	0.448007	x	0.319222	0	0.448007	0.195064
AAEL027960	Recognition	OtheRec	LRIM	atypicalLRR	low	-	-	x	0	0	0	0	0.0724682	x	0.036209	0	0	0.0724682
AAEL012255	Recognition	OtheRec	LRIM	LRIM_other	high	LRIM13	CG8852	x	0	0	0	0	0.448007	x	0.163999	0.243893	0.448007	0
AAEL007224	Recognition	OtheRec	LRIM	LRIM_other	high	LRIM22	CG8852	x	0	0	0	0	0.0880523	x	0	0	0	0.0880523
AAEL009792	Recognition	OtheRec	LRIM	LRIM_other	high	LRIM25	CG8852	x	0	0	0	0	0.208463	x	0.208463	0	0	0
AAEL009894	Recognition	OtheRec	LRIM	LRIMCL	high	LRIM21	-	x	78.9055	100	67.3117	90.4722	7.40029	x	5.83923	7.40029	4.98126	6.6952
AAEL012911	Recognition	OtheRec	LRIM	LRIMCL	high	LRIM18	igl	x	70.4103	14.9983	53.0867	100	7.76119	x	5.46467	1.16405	4.12016	7.76119
AAEL010125	Recognition	OtheRec	LRIM	LRIMCL	high	LRIM17	alrm	x	0	0	0	0	0.940063	x	0.0425503	0	0.940063	0.613637
AAEL000762	Recognition	OtheRec	LRIM	LRIMCL	high	LRIM19	CG8852	x	0	0	0	0	0.123014	x	0	0	0.123014	0.0975321
AAEL006920	Recognition	OtheRec	LRIM	LRIMCL	high	LRIM20	CG8852	x	0	0	0	0	0.246028	x	0.0425503	0	0.246028	0
AAEL024406	Recognition	OtheRec	LRIM	LRIML	high	-	alrm	x	63.3873	100	78.3035	92.8049	1.20054	x	0.76099	1.20054	0.940063	1.11416
AAEL012086	Recognition	OtheRec	LRIM	LRIML	high	LRIM1	-	x	89.4332	80.0109	43.9064	100	1.68104	x	1.50341	1.34502	0.738085	1.68104
AAEL010132	Recognition	OtheRec	LRIM	LRIML	high	LRIM3	alrm	x	0	0	0	0	0.355585	x	0.0820388	0.121946	0.123014	0.355585
AAEL010128	Recognition	OtheRec	LRIM	LRIML	high	LRIM4	alrm	x	0	0	0	0	0.522209	x	0.323581	0	0.123014	0.522209
AAEL001420	Recognition	OtheRec	LRIM	LRIMS	high	LRIM8	CG8852	x	31.3911	100	69.8642	32.696	2.46507	x	0.773812	2.46507	1.7222	0.805978
AAEL004466	Recognition	OtheRec	LRIM	LRIMS	high	LRIM23	CG8852	x	23.8073	100	17.7925	23.2357	3.20934	x	0.764056	3.20934	0.571021	0.745713
AAEL001401	Recognition	OtheRec	LRIM	LRIMS	high	LRIM10A	CG8852	x	10.481	47.8075	100	18.8154	5.38522	x	0.564426	2.57453	5.38522	1.01325
AAEL001402	Recognition	OtheRec	LRIM	LRIMS	high	LRIM10B	CG8852	x	10.1011	33.1702	100	26.1073	6.57131	x	0.663772	2.17972	6.57131	1.71559
AAEL001414	Recognition	OtheRec	LRIM	LRIMS	high	LRIM9	CG8852	x	7.43586	15.8962	100	13.3655	14.2497	x	1.05959	2.26517	14.2497	1.90455
AAEL012763	Recognition	OtheRec	LRIM	LRIMS	high	LRIM24	CG8852	x	30.4285	9.59223	70.4799	100	1.2713	x	0.386838	0.121946	0.896013	1.2713
AAEL010656	Recognition	OtheRec	LRIM	LRIMS	high	LRIM12	CG8852	x	67.6029	44.5948	44.0146	100	1.75624	x	1.18727	0.783189	0.772999	1.75624
AAEL027236	Recognition	OtheRec	LRIM	LRIMS	high	-	CG8852	x	0	0	0	0	0.123014	x	0	0	0.123014	0
AAEL012767	Recognition	OtheRec	LRIM	LRIMS	high	LRIM5	CG8852	x	0	0	0	0	0	x	0	0	0	0
AAEL012538	Recognition	OtheRec	LRIM	LRIMS	high	LRIM6	CG8852	x	0	0	0	0	0.772999	x	0.123224	0.583296	0.772999	0.0880523
AAEL001417	Recognition	OtheRec	LRIM	LRIMS	high	LRIM7	CG8852	x	0	0	0	0	0.0425503	x	0.0425503	0	0	0
AAEL008658	Recognition	OtheRec	LRIM	LRIMTM	high	LRIM16	CG4950	x	38.5836	73.5269	100	73.7823	27.6717	x	10.6767	20.3461	27.6717	20.4168
AAEL007103	Recognition	OtheRec	LRIM	LRIMTM	high	LRIM15	CG4950	x	0	0	0	0	0.491041	x	0.115125	0	0.448007	0.491041
AAEL026650	Recognition	OtheRec	LRIM	LRR-Toll	high	-	-	x	0	0	0	0	0.129156	x	0.129156	0	0	0.0724682
AAEL004120	Recognition	OtheRec	ML	ML	high	-	Npc2g	x	10.4319	100	57.8107	48.7093	3.89057	x	0.405862	3.89057	2.24917	1.89507
AAEL025109	Recognition	OtheRec	ML	ML	high	-	Npc2f	x	5.90106	100	88.0963	7.88399	131.964	x	7.78728	131.964	116.256	10.404
AAEL015136	Recognition	OtheRec	ML	ML	high	-	Npc2c	x	5.51077	100	66.3805	3.30258	5080.16	x	279.956	5080.16	3372.24	167.776
AAEL012064	Recognition	OtheRec	ML	ML	high	-	Npc2b	x	37.7694	99.7965	100	57.6958	49.5568	x	18.7173	49.4559	49.5568	28.5922
AAEL015140	Recognition	OtheRec	ML	ML	high	-	Npc2c	x	0	38.3359	100	4.82495	1.50195	x	0	0.575786	1.50195	0.0724682
AAEL020314	Recognition	OtheRec	ML	ML	high	-	Npc2a	x	5.02476	38.171	100	84.2595	1.4522	x	0.0729694	0.554318	1.4522	1.22361
AAEL007592	Recognition	OtheRec	ML	ML	high	-	Npc2c	x	32.8948	36.8361	100	20.9526	125.652	x	41.3331	46.2854	125.652	26.3275
AAEL001650	Recognition	OtheRec	ML	ML	high	-	Npc2c	x	0	32.6326	100	5.77013	1.25592	x	0	0.409839	1.25592	0.0724682
AAEL007591	Recognition	OtheRec	ML	ML	high	-	Npc2c	x	5.69036	27.4055	100	11.5456	446.888	x	25.4296	122.472	446.888	51.5961
AAEL026174	Recognition	OtheRec	ML	ML	high	-	Npc2c	x	15.7615	8.10544	100	6.1625	33.1267	x	5.22125	2.68507	33.1267	2.04143
AAEL009556	Recognition	OtheRec	ML	ML	high	-	Npc2c	x	3.21499	5.58714	100	8.58174	63.4708	x	2.04058	3.5462	63.4708	5.4469
AAEL006854	Recognition	OtheRec	ML	ML	high	-	Npc2a	x	67.3718	0	100	81.5209	1.07792	x	0.726212	0	1.07792	0.878727
AAEL015139	Recognition	OtheRec	ML	ML	high	-	Npc2c	x	20.0353	0	100	0	1.01903	x	0.204165	0	1.01903	0
AAEL015137	Recognition	OtheRec	ML	ML	high	-	Npc2c	x	0	0	100	0	3.32889	x	0	0	3.32889	0
AAEL009760	Recognition	OtheRec	ML	ML	high	-	Npc2c	x	41.4104	14.4362	14.5294	100	1759.77	x	728.727	254.044	255.684	1759.77
AAEL009956	Recognition	OtheRec	ML	ML	high	-	Npc2c	x	0	0	0	0	0.129457	x	0	0.129457	0	0
AAEL001634	Recognition	OtheRec	ML	ML	high	-	Npc2c	x	0	0	0	0	0	x	0	0	0	0
AAEL001654	Recognition	OtheRec	ML	ML	high	-	Npc2c	x	0	0	0	0	0.403957	x	0	0.121946	0.403957	0.0975321
AAEL009553	Recognition	OtheRec	ML	ML	high	-	Npc2c	x	0	0	0	0	0	x	0	0	0	0
AAEL009555	Recognition	OtheRec	ML	ML	high	-	Npc2c	x	0	0	0	0	0.121946	x	0	0.121946	0	0
AAEL027949	Recognition	OtheRec	NIMROD	DRAPER	high	-	drpr	x	97.9702	75.6699	81.3595	100	14.3711	x	14.0794	10.8746	11.6922	14.3711
AAEL019649	Recognition	OtheRec	NIMROD	EATER	high	-	eater	x	0	0	0	0	0.165946	x	0.038123	0.165946	0.123014	0.16052
AAEL026517	Recognition	OtheRec	NIMROD	NIMA	high	-	NimA	x	0	0	0	0	0.0363656	x	0.0363656	0	0	0
AAEL019650	Recognition	OtheRec	NIMROD	NIMC	high	-	NimB2	x	56.5043	24.1363	16.5029	100	1.2239	x	0.691555	0.295404	0.201978	1.2239
AAEL000636	Recognition	OtheRec	NIMROD	NIMC	high	-	NimC1	x	0	0	0	0	0.247813	x	0.247813	0	0	0.0724682
AAEL021410	Recognition	OtheRec	NIMROD	NIMC	high	-	NimC2	x	0	0	0	0	0	x	0	0	0	0
AAEL008607	Recognition	OtheRec	TEP	TEP	high	-	Tep1	x	84.5251	100	48.8124	93.2209	37.7206	x	31.8833	37.7206	18.4123	35.1635
AAEL012267	Recognition	OtheRec	TEP	TEP	high	-	Mcr	x	83.1701	100	81.0716	96.9012	4.86478	x	4.04605	4.86478	3.94396	4.71403
AAEL001794	Recognition	OtheRec	TEP	TEP	high	-	Tep2	x	39.1438	100	93.5189	96.3241	1.74735	x	0.683978	1.74735	1.6341	1.68311
AAEL000087	Recognition	OtheRec	TEP	TEP	high	-	-	x	3.37158	100	30.1312	8.16363	1.07859	x	0.0363656	1.07859	0.324992	0.0880523
AAEL025055	Recognition	OtheRec	TEP	TEP	high	-	-	x	72.3263	66.3209	65.267	100	1.06338	x	0.769103	0.705243	0.694035	1.06338
AAEL001163	Recognition	OtheRec	TEP	TEP	high	-	Tep2	x	0	0	0	0	0	x	0	0	0	0
AAEL017023	Recognition	OtheRec	TEP	TEP	high	-	-	x	0	0	0	0	0.846626	x	0.314812	0.7907	0.123014	0.846626
AAEL025334	Recognition	OtheRec	TEP	TEP	low	-	-	x	0	0	0	0	0	x	0	0	0	0
AAEL019958	Recognition	OtheRec	TEP	TEP	high	-	-	x	0	0	0	0	0	x	0	0	0	0
AAEL019959	Recognition	OtheRec	TEP	TEP	high	-	-	x	0	0	0	0	0	x	0	0	0	0
AAEL012437	RNAinterference	piRNA	piRNA	piRNA	high	-	-	x	67.4758	27.1729	86.8719	100	9.79848	x	6.6116	2.66253	8.51213	9.79848
AAEL010029	RNAinterference	piRNA	piRNA	piRNA	high	-	Hen1	x	59.8967	79.0287	64.3403	100	13.1472	x	7.87473	10.39	8.45894	13.1472
AAEL000289	RNAinterference	piRNA	piRNA	piRNA	high	-	Gasz	x	57.6259	62.5276	54.5333	100	6.63625	x	3.8242	4.14949	3.61897	6.63625
AAEL013072	RNAinterference	piRNA	piRNA	piRNA	high	-	papi	x	58.3573	71.9438	51.0554	100	6.07405	x	3.54465	4.3699	3.10113	6.07405
AAEL009326	RNAinterference	piRNA	piRNA	piRNA	high	-	Fmr1	x	66.6791	26.279	28.4996	100	31.4715	x	20.9849	8.27041	8.96927	31.4715
AAEL001939	RNAinterference	piRNA	piRNA	piRNA	high	-	SoYb	x	59.1796	51.6404	25.6117	100	6.38028	x	3.77582	3.2948	1.6341	6.38028
AAEL000293	RNAinterference	piRNA	SRRP	TSN	high	-	Tudor-SN	x	52.1194	75.8964	23.9143	100	126.685	x	66.0275	96.1493	30.2958	126.685
AAEL020359	RNAinterference	RNAi	0	0	high	-	vret	x	41.3089	53.1156	10.6255	100	6.94638	x	2.86947	3.68962	0.738085	6.94638
AAEL007080	RNAinterference	RNAi	RNAi	RNAi	high	-	mino	x	11.2803	75.5005	100	14.0446	62.6952	x	7.07218	47.3353	62.6952	8.80528
AAEL021734	RNAinterference	RNAi	RNAi	RNAi	high	-	mino	x	4.44308	58.0696	100	6.48586	1.56091	x	0.0693525	0.906416	1.56091	0.101239
AAEL027589	RNAinterference	RNAi	RNAi	RNAi	high	-	qin	x	95.4778	19.3043	11.3799	100	2.16195	x	2.06418	0.41735	0.246028	2.16195
AAEL021382	RNAinterference	RNAi	RNAi	RNAi	high	-	mino	x	0	0	0	0	0	x	0	0	0	0
AAEL013721	RNAinterference	RNAi	RNAi	RNAi	high	loqs2	-	x	0	0	0	0	0.116647	x	0.116647	0	0	0
AAEL019460	RNAinterference	RNAi	SRRP	Armitage	high	-	armi	x	73.8492	32.2917	22.9216	100	54.4218	x	40.1901	17.5738	12.4744	54.4218
AAEL006794	RNAinterference	RNAi	SRRP	DSRNA	high	-	Dcr-2	x	100	83.1023	98.2416	85.3209	73.3829	x	73.3829	60.9829	72.0925	62.6109
AAEL021519	RNAinterference	RNAi	SRRP	DSRNA	high	-	pasha	x	100	66.1366	16.102	88.4062	3.14762	x	3.14762	2.08173	0.50683	2.78269
AAEL011753	RNAinterference	RNAi	SRRP	DSRNA	high	-	r2d2	x	83.9776	100	22.3334	92.6741	8.42425	x	7.07448	8.42425	1.88142	7.8071
AAEL026022	RNAinterference	RNAi	SRRP	DSRNA	high	-	pasha	x	59.4022	23.7795	46.5624	100	7.76019	x	4.60972	1.84533	3.61333	7.76019
AAEL001612	RNAinterference	RNAi	SRRP	DSRNA	high	-	Dcr-1	x	36.7886	12.8009	37.9566	100	1.29637	x	0.476915	0.165946	0.492057	1.29637
AAEL008687	RNAinterference	RNAi	SRRP	DSRNA	high	loqs	loqs	x	53.4119	34.698	21.8798	100	15.4993	x	8.27847	5.37794	3.39121	15.4993
AAEL008592	RNAinterference	RNAi	SRRP	DSRNA	high	-	drosha	x	0	0	0	0	0.975978	x	0.368331	0.365839	0.403957	0.975978
AAEL007823	RNAinterference	RNAi	SRRP	PAZPIWI	high	-	AGO3	x	100	53.4801	80.4852	90.21	2.08504	x	2.08504	1.11508	1.67815	1.88091
AAEL017251	RNAinterference	RNAi	SRRP	PAZPIWI	high	AGO2	AGO2	x	90.3356	44.7378	60.574	100	14.5464	x	13.1406	6.50775	8.81134	14.5464
AAEL013227	RNAinterference	RNAi	SRRP	PAZPIWI	high	PIWI6	aub	x	58.1503	56.213	54.5609	100	13.1043	x	7.6202	7.36634	7.14983	13.1043
AAEL013233	RNAinterference	RNAi	SRRP	PAZPIWI	high	PIWI5	aub	x	94.8135	81.5896	45.004	100	19.0526	x	18.0645	15.545	8.57445	19.0526
AAEL012410	RNAinterference	RNAi	SRRP	PAZPIWI	high	AGO1b	AGO1	x	77.7714	31.7853	32.0439	100	63.6019	x	49.4641	20.2161	20.3805	63.6019
AAEL007698	RNAinterference	RNAi	SRRP	PAZPIWI	high	PIWI4	aub	x	62.2736	60.3601	25.1539	100	19.2415	x	11.9824	11.6142	4.83997	19.2415
AAEL021425	RNAinterference	RNAi	SRRP	PAZPIWI	high	-	aub	x	0	0	0	0	0	x	0	0	0	0
AAEL008098	RNAinterference	RNAi	SRRP	PAZPIWI	high	PIWI2	aub	x	0	0	0	0	0.116647	x	0.116647	0	0	0.0880523
AAEL013692	RNAinterference	RNAi	SRRP	PAZPIWI	high	PIWI3	aub	x	0	0	0	0	0.123014	x	0.038123	0	0.123014	0
AAEL006287	RNAinterference	RNAi	SRRP	PAZPIWI	high	PIWI7	aub	x	0	0	0	0	0.320979	x	0.320979	0	0.123014	0.185584
AAEL009287	RNAinterference	RNAi	SRRP	Ran	high	-	Ran	x	50.3717	56.0669	14.1686	100	258.09	x	130.005	144.703	36.5678	258.09
AAEL009392	RNAinterference	RNAi	SRRP	RanBP21	high	-	Ranbp21	x	57.3496	82.4206	30.8323	100	20.1161	x	11.5365	16.5799	6.20226	20.1161
AAEL010787	RNAinterference	RNAi	SRRP	Rm62	high	-	Rm62	x	100	14.0172	15.8238	66.866	1253.94	x	1253.94	175.767	198.421	838.461
AAEL010402	RNAinterference	RNAi	SRRP	Rm62	high	-	CG7878	x	87.4449	100	80.247	99.8531	8.31938	x	7.27487	8.31938	6.67605	8.30716
AAEL001317	RNAinterference	RNAi	SRRP	Rm62	high	-	CG6418	x	48.3537	100	38.8556	93.3388	16.6149	x	8.03391	16.6149	6.4558	15.5081
AAEL001769	RNAinterference	RNAi	SRRP	Rm62	high	-	mahe	x	97.9477	33.6559	73.5544	100	34.4555	x	33.7484	11.5963	25.3435	34.4555
AAEL002083	RNAinterference	RNAi	SRRP	Rm62	high	-	CG10077	x	76.3734	94.674	55.5696	100	359.804	x	274.795	340.641	199.941	359.804
AAEL002351	RNAinterference	RNAi	SRRP	Rm62	high	-	CG10077	x	89.8085	82.2477	48.1756	100	4.9965	x	4.48728	4.10951	2.4071	4.9965
AAEL008738	RNAinterference	RNAi	SRRP	Rm62	high	-	mahe	x	77.6482	33.8313	42.1298	100	263.625	x	204.7	89.1878	111.065	263.625
AAEL001657	RNAinterference	RNAi	SRRP	Rm62	high	-	CG10333	x	54.8804	36.5518	34.3603	100	13.8561	x	7.60431	5.06468	4.76101	13.8561
AAEL004472	RNAinterference	RNAi	SRRP	Rm62	high	-	bel	x	62.1871	34.1249	33.0656	100	268.813	x	167.167	91.7323	88.8848	268.813
AAEL004978	RNAinterference	RNAi	SRRP	Rm62	high	-	vas	x	56.0318	42.0855	28.3699	100	10.8667	x	6.08878	4.57328	3.08286	10.8667
AAEL013985	RNAinterference	RNAi	SRRP	Rm62	high	-	CG6227	x	56.2004	23.1897	20.0525	100	17.5251	x	9.8492	4.06403	3.51423	17.5251
AAEL012962	RNAinterference	RNAi	SRRP	Rm62	high	-	CG5589	x	44.2601	40.3597	10.5378	100	18.5911	x	8.22845	7.50331	1.95909	18.5911
AAEL023716	RNAinterference	RNAi	SRRP	Spindle_E	high	-	spn-E	x	69.2939	43.1025	52.5178	100	14.9704	x	10.3736	6.45263	7.86214	14.9704
AAEL008073	RNAinterference	RNAi	SRRP	VIG	high	-	FDY	x	45.6018	40.1656	10.1886	100	353.933	x	161.4	142.159	36.0608	353.933
AAEL008596	Signal Transduction	Cytokin	SPZ	SPZ	high	SPZ3A	spz3	x	73.9564	59.023	77.7185	100	1.98923	x	1.47116	1.1741	1.546	1.98923
AAEL007897	Signal Transduction	Cytokin	SPZ	SPZ	high	SPZ4	spz4	x	71.8613	61.8672	38.5003	100	1.27806	x	0.91843	0.7907	0.492057	1.27806
AAEL013434	Signal Transduction	Cytokin	SPZ	SPZ	high	-	spz	x	74.301	44.6495	31.9873	100	4.44858	x	3.30534	1.98627	1.42298	4.44858
AAEL013433	Signal Transduction	Cytokin	SPZ	SPZ	high	SPZ1C	spz	x	0	0	0	0	0.165946	x	0	0.165946	0	0
AAEL001435	Signal Transduction	Cytokin	SPZ	SPZ	high	SPZ2	NT1	x	0	0	0	0	0.305457	x	0.154613	0	0.123014	0.305457
AAEL001929	Signal Transduction	Cytokin	SPZ	SPZ	high	SPZ5	spz5	x	0	0	0	0	0.369043	x	0.14722	0	0.369043	0.305457
AAEL012164	Signal Transduction	Cytokin	SPZ	SPZ	high	SPZ6	spz6	x	0	0	0	0	0	x	0	0	0	0
AAEL021557	Signal Transduction	PathMod	IMDMOD	PIRK	high	pirk	pirk	x	50.4985	100	93.5752	61.8862	133.357	x	67.3434	133.357	124.789	82.5297
AAEL021793	Signal Transduction	PathMod	IMDMOD	UBIQUI	high	-	POSH	x	59.9985	100	30.1312	84.8994	1.07859	x	0.64714	1.07859	0.324992	0.915719
AAEL013253	Signal Transduction	PathMod	IMDMOD	UBIQUI	high	-	CYLD	x	78.4689	33.3502	87.707	100	14.6019	x	11.4579	4.86975	12.8069	14.6019
AAEL014642	Signal Transduction	PathMod	IMDMOD	UBIQUI	high	ben	ben	x	58.2645	60.1085	69.4907	100	61.5789	x	35.8787	37.0142	42.7916	61.5789
AAEL011873	Signal Transduction	PathMod	IMDMOD	UBIQUI	high	Uev1A	Uev1A	x	47.9439	74.3223	32.6701	100	87.4149	x	41.9101	64.9687	28.5585	87.4149
AAEL023060	Signal Transduction	PathMod	IMDMOD	UBIQUI	high	-	scny	x	38.7828	13.0985	32.2905	100	3.78132	x	1.4665	0.495296	1.22101	3.78132
AAEL003103	Signal Transduction	PathMod	IMDMOD	UBIQUI	high	eff	eff	x	52.9455	57.2602	26.8897	100	153.15	x	81.0862	87.6941	41.1817	153.15
AAEL026694	Signal Transduction	PathMod	JASTMOD	PIAS	high	PIAS2	Su(var)2-10	x	65.7439	57.3428	41.1805	100	13.9289	x	9.1574	7.98721	5.73599	13.9289
AAEL015099	Signal Transduction	PathMod	JASTMOD	PIAS	high	PIAS1	Su(var)2-10	x	0	0	0	0	0.84559	x	0.743193	0.277816	0	0.84559
AAEL001919	Signal Transduction	PathMod	JASTMOD	PTP61F	high	-	Ptp61F	x	82.7786	81.0146	42.591	100	14.8512	x	12.2936	12.0316	6.32528	14.8512
AAEL019728	Signal Transduction	PathMod	JASTMOD	SOCS	high	SOCS	Socs36E	x	84.6097	62.1037	44.7606	100	27.8115	x	23.5312	17.272	12.4486	27.8115
AAEL000255	Signal Transduction	PathMod	JASTMOD	SOCS	high	-	Socs44A	x	0	0	0	0	0.433156	x	0.433156	0	0.123014	0.0724682
AAEL000709	Signal Transduction	PathMod	TOLLMOD	CACT	high	cact	cact	x	100	88.17	27.5007	55.854	44.4323	x	44.4323	39.1759	12.2192	24.8172
AAEL013167	Signal Transduction	PathMod	TOLLMOD	CACTIN	high	-	cactin	x	41.1664	100	31.409	58.5645	10.3762	x	4.27151	10.3762	3.25906	6.07677
AAEL005339	Signal Transduction	PathMod	TOLLMOD	HRS	high	-	Hrs	x	57.3306	65.6754	67.3551	100	12.8586	x	7.37191	8.44493	8.66092	12.8586
AAEL018205	Signal Transduction	PathMod	TOLLMOD	MOP	high	-	mop	x	55.0856	81.1025	75.0857	100	17.3132	x	9.53706	14.0414	12.9997	17.3132
AAEL021839	Signal Transduction	PathMod	TOLLMOD	PELLINO	high	-	Pli	x	85.743	61.7294	100	74.8742	10.7339	x	9.20356	6.62597	10.7339	8.03691
AAEL027903	Signal Transduction	PathMod	TOLLMOD	UBIQUI	high	-	lwr	x	81.8974	89.1139	54.0713	100	63.3485	x	51.8808	56.4523	34.2534	63.3485
AAEL003371	Signal Transduction	PathMod	TOLLMOD	UBIQUI	high	-	slmb	x	63.9088	53.292	38.2679	100	39.2091	x	25.058	20.8953	15.0045	39.2091
AAEL025779	Signal Transduction	PathMod	TOLLMOD	UBIQUI	high	-	lwr	x	45.6705	23.4479	27.4041	100	68.6909	x	31.3715	16.1066	18.8242	68.6909
AAEL022729	Signal Transduction	PathSig	IMDSIG	AKIRIN	high	-	akirin	x	67.8489	56.7372	45.3182	100	78.6774	x	53.3817	44.6393	35.6552	78.6774
AAEL027860	Signal Transduction	PathSig	IMDSIG	CASPAR	high	casp	casp	x	68.2606	33.1947	73.4278	100	55.6873	x	38.0125	18.4852	40.89	55.6873
AAEL001932	Signal Transduction	PathSig	IMDSIG	DEATH	high	FADD	Fadd	x	55.4476	66.5089	37.8162	100	4.08819	x	2.2668	2.71901	1.546	4.08819
AAEL010083	Signal Transduction	PathSig	IMDSIG	DEATH	high	IMD	imd	x	75.9905	90.4243	32.4905	100	1.13585	x	0.863136	1.02708	0.369043	1.13585
AAEL000590	Signal Transduction	PathSig	IMDSIG	DNR1	high	DNR1	dnr1	x	44.996	13.3687	100	55.5701	42.7186	x	19.2216	5.7109	42.7186	23.7388
AAEL014557	Signal Transduction	PathSig	IMDSIG	HOMEOBOX	high	cad	cad	x	79.3825	53.6168	63.0202	100	23.7945	x	18.8886	12.7578	14.9953	23.7945
AAEL012510	Signal Transduction	PathSig	IMDSIG	IKK	high	IKK2	key	x	56.2727	100	64.0262	59.2168	14.0375	x	7.89927	14.0375	8.98767	8.31256
AAEL003245	Signal Transduction	PathSig	IMDSIG	IKK	high	IKK1	IKKbeta	x	35.9093	34.083	100	49.672	4.83997	x	1.738	1.64961	4.83997	2.40411
AAEL023627	Signal Transduction	PathSig	IMDSIG	IKK	high	-	key	x	29.0986	0	4.22607	100	5.78008	x	1.68192	0	0.24427	5.78008
AAEL005073	Signal Transduction	PathSig	IMDSIG	IKK	high	-	key	x	0	0	0	0	0.17	x	0.116882	0.121946	0	0.17
AAEL005079	Signal Transduction	PathSig	IMDSIG	IKK	high	-	key	x	0	0	0	0	0.369043	x	0.121466	0	0.369043	0.16052
AAEL018130	Signal Transduction	PathSig	IMDSIG	KINASE	high	TAK1	Tak1	x	88.7412	100	44.9155	91.1739	3.91204	x	3.47159	3.91204	1.75711	3.56676
AAEL007624	Signal Transduction	PathSig	IMDSIG	REL	high	REL2	Rel	x	100	97.2578	61.6944	97.9628	9.72582	x	9.72582	9.45912	6.00029	9.52769
AAEL026170	Signal Transduction	PathSig	IMDSIG	TAB2	high	tab2	Tab2	x	100	58.9126	89.2305	87.5298	4.21409	x	4.21409	2.48263	3.76025	3.68859
AAEL012471	Signal Transduction	PathSig	JASTSIG	DOME	high	DOME	dome	x	73.2359	86.1414	55.9775	100	9.1808	x	6.72364	7.90847	5.13919	9.1808
AAEL012553	Signal Transduction	PathSig	JASTSIG	HOP	high	HOP	hop	x	52.9774	27.0479	100	66.2711	6.32528	x	3.35097	1.71086	6.32528	4.19183
AAEL020559	Signal Transduction	PathSig	JASTSIG	STAT	high	STAT	Stat92E	x	73.3122	31.0467	72	100	105.338	x	77.2259	32.7041	75.8436	105.338
AAEL000200	Signal Transduction	PathSig	JASTSIG	VAGO	high	-	CG14132	x	100	67.1778	38.2746	95.1527	81.1972	x	81.1972	54.5464	31.0779	77.2613
AAEL002583	Signal Transduction	PathSig	TOLL	TOLL	high	TOLL7	Toll-7	x	100	59.0112	45.2653	92.9618	1.90234	x	1.90234	1.12259	0.861099	1.76845
AAEL026297	Signal Transduction	PathSig	TOLL	TOLL	high	-	Tl	x	68.133	100	53.7877	76.9409	2.12324	x	1.44663	2.12324	1.14204	1.63364
AAEL013441	Signal Transduction	PathSig	TOLL	TOLL	high	TOLL9A	Toll-9	x	39.9078	29.418	100	67.9643	58.0841	x	23.1801	17.0872	58.0841	39.4765
AAEL009551	Signal Transduction	PathSig	TOLL	TOLL	high	TOLL11	Toll-6	x	80.4493	9.54154	87.9917	100	2.55611	x	2.05637	0.243893	2.24917	2.55611
AAEL014896	Signal Transduction	PathSig	TOLL	TOLL	high	-	Toll-9	x	79.0219	52.3293	58.6542	100	600.799	x	474.763	314.394	352.394	600.799
AAEL027951	Signal Transduction	PathSig	TOLL	TOLL	high	-	Tl	x	0	0	0	0	0.0425503	x	0.0425503	0	0	0
AAEL004000	Signal Transduction	PathSig	TOLL	TOLL	high	TOLL10	Tollo	x	0	0	0	0	0.409839	x	0.407181	0.409839	0	0.0880523
AAEL007619	Signal Transduction	PathSig	TOLL	TOLL	high	TOLL5A	Tl	x	0	0	0	0	0.944158	x	0.814044	0.37335	0.571021	0.944158
AAEL000057	Signal Transduction	PathSig	TOLL	TOLL	high	TOLL5B	Tl	x	0	0	0	0	0.115125	x	0.115125	0	0	0
AAEL000671	Signal Transduction	PathSig	TOLL	TOLL	high	TOLL6	Toll-6	x	0	0	0	0	0	x	0	0	0	0
AAEL000633	Signal Transduction	PathSig	TOLL	TOLL	high	TOLL8	Tollo	x	0	0	0	0	0.969222	x	0.828657	0.121946	0.123014	0.969222
AAEL007768	Signal Transduction	PathSig	TOLLSIG	DEATH	high	MYD	Myd88	x	100	82.9999	75.3759	81.6168	4.44062	x	4.44062	3.68571	3.34716	3.62429
AAEL007642	Signal Transduction	PathSig	TOLLSIG	DEATH	high	TUBE	-	x	53.3663	100	53.3813	60.8113	10.8449	x	5.78755	10.8449	5.78917	6.59495
AAEL006571	Signal Transduction	PathSig	TOLLSIG	DEATH	high	PELLE	pll	x	72.5669	92.4068	100	91.8964	6.49985	x	4.71674	6.0063	6.49985	5.97313
AAEL007696	Signal Transduction	PathSig	TOLLSIG	REL	high	REL1A	dl	x	80.158	42.4473	80.4705	100	20.1612	x	16.1608	8.55789	16.2238	20.1612
AAEL027765	Signal Transduction	PathSig	TOLLSIG	REL	high	-	dl	x	0	0	0	0	0	x	0	0	0	0
AAEL006930	Signal Transduction	PathSig	TOLLSIG	REL	high	REL1B	dl	x	0	0	0	0	0	x	0	0	0	0
AAEL028236	Signal Transduction	PathSig	TOLLSIG	TRAF	high	-	Traf-like	x	74.3886	70.1143	35.9733	100	5.20105	x	3.86899	3.64668	1.87099	5.20105
AAEL001515	Stress	CaspaseSig	BCL2	Bcl2	high	DEBCL	Debcl	x	94.4803	58.5974	83.1605	100	2.34481	x	2.21538	1.374	1.94995	2.34481
AAEL021581	Stress	CaspaseSig	BCL2	Bcl2	high	-	Buffy	x	65.2396	41.6063	51.5355	100	69.1147	x	45.0902	28.7561	35.6186	69.1147
AAEL026744	Stress	CaspaseSig	CASP	Caspase	high	-	-	x	56.4323	60.9115	100	36.1105	54.863	x	30.9605	33.4179	54.863	19.8113
AAEL011562	Stress	CaspaseSig	CASP	CASPL	high	Dronc	Dronc	x	33.334	47.8537	100	30.0704	24.6055	x	8.20198	11.7746	24.6055	7.39897
AAEL014148	Stress	CaspaseSig	CASP	CASPL	high	Dredd	Dredd	x	65.5218	76.2715	47.3258	100	3.45287	x	2.26239	2.63356	1.6341	3.45287
AAEL003439	Stress	CaspaseSig	CASP	CASPS	high	CASPS18	Decay	x	100	98.418	27.994	72.9829	4.0796	x	4.0796	4.01506	1.14204	2.97741
AAEL005956	Stress	CaspaseSig	CASP	CASPS	high	CASPS16	Damm	x	63.8155	100	43.9542	61.8211	18.2843	x	11.6682	18.2843	8.03671	11.3035
AAEL014348	Stress	CaspaseSig	CASP	CASPS	high	CASPS8	-	x	30.9176	100	30.4911	45.1892	9.21925	x	2.85038	9.21925	2.81105	4.16611
AAEL017498	Stress	CaspaseSig	CASP	CASPS	high	CASPS21	Damm	x	68.9844	58.8744	100	77.8726	5.32289	x	3.67196	3.13382	5.32289	4.14508
AAEL005955	Stress	CaspaseSig	CASP	CASPS	high	CASPS17	Damm	x	77.8961	44.0248	100	58.9987	9.34582	x	7.28003	4.11448	9.34582	5.51391
AAEL003444	Stress	CaspaseSig	CASP	CASPS	high	CASPS19	Decay	x	61.0573	45.3698	78.53	100	14.0283	x	8.56532	6.36463	11.0165	14.0283
AAEL012143	Stress	CaspaseSig	CASP	CASPS	high	CASPS7	Dcp-1	x	0	0	0	0	0.324992	x	0.146907	0.287893	0.324992	0
AAEL000874	Stress	CaspaseSig	CASPA	ARK	high	ARK	Dark	x	30.2535	64.3918	100	20.7533	8.52126	x	2.57798	5.48699	8.52126	1.76844
AAEL014251	Stress	CaspaseSig	IAP	IAP	high	IAP5	Det	x	17.278	42.3005	100	11.6409	1.37893	x	0.238253	0.583296	1.37893	0.16052
AAEL006633	Stress	CaspaseSig	IAP	IAP	high	IAP2	Diap2	x	93.5773	96.3734	69.0074	100	4.87455	x	4.56148	4.69777	3.3638	4.87455
AAEL001501	Stress	CaspaseSig	IAP	IAP	high	-	CIAPIN1	x	57.629	97.6229	61.0785	100	46.2223	x	26.6374	45.1236	28.2319	46.2223
AAEL009074	Stress	CaspaseSig	IAP	IAP	high	IAP1	Diap1	x	70.7514	38.9011	46.6284	100	55.4306	x	39.2179	21.5631	25.8464	55.4306
AAEL012446	Stress	CaspaseSig	IAP	IAP	high	IAP6	Bruce	x	71.737	41.4942	29.988	100	40.4836	x	29.0418	16.7984	12.1402	40.4836
AAEL014196	Stress	CaspaseSig	IAP ANTAGONIST	anti-IAP	high	-	-	x	55.9044	100	22.9773	84.0988	1.94978	x	1.09001	1.94978	0.448007	1.63974
AAEL004392	Stress	CaspaseSig	IAP ANTAGONIST	anti-IAP	high	IMP	-	x	54.4633	62.1451	0	100	1.06403	x	0.579506	0.661243	0	1.06403
AAEL013407	Stress	Ox-Stress	CAT	CAT	high	Cat	Cat	x	46.3286	52.7419	100	80.7156	274.289	x	127.074	144.665	274.289	221.394
AAEL027519	Stress	Ox-Stress	GST	GST_other	high	-	GstE11	x	25.7376	100	93.9619	48.5755	14.1568	x	3.64362	14.1568	13.302	6.87672
AAEL024134	Stress	Ox-Stress	GST	GST_other	high	-	GstE11	x	25.7376	100	93.9619	48.5755	14.1568	x	3.64362	14.1568	13.302	6.87672
AAEL023692	Stress	Ox-Stress	GST	GST_other	high	-	GstE11	x	16.6272	100	98.9085	23.5796	51.3887	x	8.54449	51.3887	50.8277	12.1173
AAEL027003	Stress	Ox-Stress	GST	GST_other	high	-	GstE11	x	11.0921	100	27.4712	14.2097	250.543	x	27.7905	250.543	68.8272	35.6013
AAEL025929	Stress	Ox-Stress	GST	GST_other	high	-	GstT1	x	72.7226	61.6499	100	99.7967	52.0719	x	37.868	32.1023	52.0719	51.966
AAEL024885	Stress	Ox-Stress	GST	GST_other	high	-	CG10428	x	75.9608	77.1968	49.7836	100	22.7726	x	17.2982	17.5797	11.337	22.7726
AAEL007017	Stress	Ox-Stress	GST	GST_other	high	-	CG10428	x	0	0	0	0	0.588243	x	0.588243	0.169357	0.16988	0.500245
AAEL007026	Stress	Ox-Stress	GST	GST_other	high	-	CG10428	x	0	0	0	0	0.0363656	x	0.0363656	0	0	0
AAEL025173	Stress	Ox-Stress	GST	GST_other	high	-	GstE11	x	0	0	0	0	0.0820095	x	0	0	0.0820095	0.0325107
AAEL020409	Stress	Ox-Stress	GST	GST_other	high	-	GstE11	x	0	0	0	0	0.0820095	x	0	0	0.0820095	0.0325107
AAEL022511	Stress	Ox-Stress	GST	GST_other	high	-	GstE11	x	0	0	0	0	5.91694e-06	x	6.04119e-07	5.91694e-06	2.73209e-06	6.73245e-07
AAEL026530	Stress	Ox-Stress	GST	GST_other	high	-	GstD1	x	0	0	0	0	0.772999	x	0.227345	0.165946	0.772999	0.336625
AAEL001071	Stress	Ox-Stress	GST	GSTD	high	GSTD5	GstD1	x	100	15.8386	87.6214	84.5862	2.09547	x	2.09547	0.331893	1.83608	1.77248
AAEL010582	Stress	Ox-Stress	GST	GSTD	high	GSTD11	GstD1	x	21.8162	100	42.1571	51.2785	146.995	x	32.0687	146.995	61.9688	75.3768
AAEL010591	Stress	Ox-Stress	GST	GSTD	high	GSTD6	-	x	18.4397	100	10.7082	21.2668	40.6891	x	7.50296	40.6891	4.35705	8.65327
AAEL001054	Stress	Ox-Stress	GST	GSTD	high	GSTD4	-	x	18.272	14.1039	100	35.0348	9.17125	x	1.67577	1.29351	9.17125	3.21313
AAEL001061	Stress	Ox-Stress	GST	GSTD	high	GSTD1	GstD1	x	54.9843	78.6802	98.338	100	172.183	x	94.6736	135.474	169.321	172.183
AAEL001059	Stress	Ox-Stress	GST	GSTD	high	GSTD3	-	x	0	0	0	0	0	x	0	0	0	0
AAEL001090	Stress	Ox-Stress	GST	GSTD	high	GSTD7	GstD11	x	0	0	0	0	0.246028	x	0.158363	0.129457	0.246028	0.0880523
AAEL007948	Stress	Ox-Stress	GST	GSTE	high	GSTE7	GstE11	x	25.7376	100	93.9619	48.5755	14.1568	x	3.64362	14.1568	13.302	6.87672
AAEL007951	Stress	Ox-Stress	GST	GSTE	high	GSTE2	GstE11	x	16.6272	100	98.9085	23.5796	51.3887	x	8.54449	51.3887	50.8277	12.1173
AAEL007962	Stress	Ox-Stress	GST	GSTE	high	GSTE4	GstE11	x	30.8108	69.8653	100	76.6314	131.882	x	40.634	92.1397	131.882	101.063
AAEL007947	Stress	Ox-Stress	GST	GSTE	high	GSTE3	GstE11	x	57.2728	43.6773	68.4497	100	13.8867	x	7.95328	6.06532	9.50538	13.8867
AAEL007946	Stress	Ox-Stress	GST	GSTE	high	GSTE6	GstE11	x	52.0686	41.4385	67.5687	100	40.315	x	20.9914	16.7059	27.2403	40.315
AAEL007954	Stress	Ox-Stress	GST	GSTE	high	GSTE1	GstE11	x	0	0	0	0	0.51273	x	0.0825355	0	0	0.51273
AAEL007964	Stress	Ox-Stress	GST	GSTE	high	GSTE5	GstE11	x	0	0	0	0	0.0820095	x	0	0	0.0820095	0.0325107
AAEL007955	Stress	Ox-Stress	GST	GSTE	high	GSTE8	GstE14	x	0	0	0	0	0.495296	x	0.0806733	0.495296	0	0
AAEL011752	Stress	Ox-Stress	GST	GSTI	high	GSTI1	gfzf	x	56.9495	62.1562	18.5405	100	3.47143	x	1.97696	2.15771	0.64362	3.47143
AAEL017085	Stress	Ox-Stress	GST	GSTO	high	GSTO1	GstO1	x	51.9936	100	44.6037	88.3775	19.5092	x	10.1435	19.5092	8.7018	17.2417
AAEL011741	Stress	Ox-Stress	GST	GSTS	high	GSTS1	GstS1	x	47.8959	62.4247	100	77.8557	287.383	x	137.645	179.398	287.383	223.744
AAEL009016	Stress	Ox-Stress	GST	GSTT	high	GSTT2	GstT1	x	42.4806	100	28.9339	59.2704	10.5657	x	4.4884	10.5657	3.05708	6.26236
AAEL004229	Stress	Ox-Stress	GST	GSTT	high	GSTT4	GstT4	x	2.28271	100	13.9166	2.72028	548.04	x	12.5102	548.04	76.2685	14.9082
AAEL009017	Stress	Ox-Stress	GST	GSTT	high	GSTT1	GstT1	x	44.8645	85.2269	83.7284	100	57.0184	x	25.581	48.595	47.7406	57.0184
AAEL010500	Stress	Ox-Stress	GST	GSTX	high	GSTX2	-	x	32.9129	31.5039	100	38.281	9.78469	x	3.22042	3.08256	9.78469	3.74567
AAEL000092	Stress	Ox-Stress	GST	GSTX	high	GSTX1	-	x	36.0714	98.1426	39.552	100	215.378	x	77.6898	211.377	85.1862	215.378
AAEL011934	Stress	Ox-Stress	GST	GSTZ	high	GSTZ1	GstZ2	x	75.9467	53.3956	45.9885	100	9.74171	x	7.3985	5.20164	4.48007	9.74171
AAEL012069	Stress	Ox-Stress	PRDX	GPX	high	GPXH1	PHGPx	x	55.9306	83.3111	100	70.7982	110.011	x	61.5298	91.6513	110.011	77.8857
AAEL008397	Stress	Ox-Stress	PRDX	GPX	high	GPXH2	-	x	85.0925	72.136	54.1022	100	39.8737	x	33.9295	28.7633	21.5725	39.8737
AAEL000495	Stress	Ox-Stress	PRDX	GPX	high	GPXH3	-	x	0	0	0	0	0.0724682	x	0.0413241	0	0	0.0724682
AAEL020747	Stress	Ox-Stress	PRDX	HPX	high	-	CG10211	x	100	87.1396	44.5601	88.934	8.14205	x	8.14205	7.09495	3.6281	7.24105
AAEL019639	Stress	Ox-Stress	PRDX	HPX	high	-	CG42331	x	37.2678	100	46.1656	13.1813	1.40794	x	0.524709	1.40794	0.649985	0.185584
AAEL011941	Stress	Ox-Stress	PRDX	HPX	high	-	cd	x	40.9559	79.3739	85.4516	100	1.46974	x	0.601946	1.16659	1.25592	1.46974
AAEL013171	Stress	Ox-Stress	PRDX	HPX	high	HPX2	Irc	x	61.9239	60.0521	77.6506	100	11.6739	x	7.22895	7.01044	9.06487	11.6739
AAEL000342	Stress	Ox-Stress	PRDX	HPX	high	-	Pxn	x	86.5908	45.5353	61.4368	100	2.71663	x	2.35235	1.23703	1.66901	2.71663
AAEL000496	Stress	Ox-Stress	PRDX	HPX	high	-	-	x	64.2994	13.8256	38.0658	100	44.2449	x	28.4492	6.11713	16.8422	44.2449
AAEL017467	Stress	Ox-Stress	PRDX	HPX	high	-	-	x	0	0	0	0	0	x	0	0	0	0
AAEL026038	Stress	Ox-Stress	PRDX	HPX	high	-	Pxt	x	0	0	0	0	0.408957	x	0.408957	0.165946	0.246028	0
AAEL000507	Stress	Ox-Stress	PRDX	HPX	high	-	-	x	0	0	0	0	0.123224	x	0.123224	0	0	0
AAEL006014	Stress	Ox-Stress	PRDX	HPX	high	HPX1	Pxd	x	0	0	0	0	0.676264	x	0.167888	0.676264	0.324992	0.654285
AAEL002354	Stress	Ox-Stress	PRDX	HPX	high	HPX5	cysu	x	0	0	0	0	0.165946	x	0.0724181	0.165946	0	0
AAEL004388	Stress	Ox-Stress	PRDX	HPX	high	HPX8A	Pxt	x	0	0	0	0	0.883096	x	0.883096	0	0.123014	0
AAEL004390	Stress	Ox-Stress	PRDX	HPX	high	HPX8B	Pxt	x	0	0	0	0	0.47894	x	0.47894	0	0	0.195064
AAEL004386	Stress	Ox-Stress	PRDX	HPX	high	pxt	Pxt	x	0	0	0	0	0.430066	x	0.430066	0	0.123014	0.0880523
AAEL019408	Stress	Ox-Stress	PRDX	TPX	high	-	Jafrac1	x	5.76331	100	7.56393	9.23287	744.18	x	42.8894	744.18	56.2893	68.7092
AAEL002309	Stress	Ox-Stress	PRDX	TPX	high	TPX4	Prx2540-1	x	22.564	24.739	100	37.4437	648.745	x	146.383	160.493	648.745	242.914
AAEL009051	Stress	Ox-Stress	PRDX	TPX	high	TPX5	Prx6005	x	36.8284	39.7266	28.7587	100	22.084	x	8.13318	8.77322	6.35106	22.084
AAEL025567	Stress	Ox-Stress	PRDX	TPX	high	-	Jafrac2	x	87.2066	64.8023	24.0399	100	86.4134	x	75.3582	55.9979	20.7737	86.4134
AAEL007135	Stress	Ox-Stress	PRDX	TPX	high	-	Prx5	x	63.4047	47.2332	23.5038	100	69.7054	x	44.1965	32.9241	16.3834	69.7054
AAEL013528	Stress	Ox-Stress	PRDX	TPX	high	TPX1	Prx3	x	40.2197	35.7315	19.0964	100	83.3515	x	33.5238	29.7828	15.9171	83.3515
AAEL006271	Stress	Ox-Stress	SOD	SODCuZn	high	CUSOD2	Sod3	x	55.9205	100	94.7879	63.6598	6.13469	x	3.43055	6.13469	5.81495	3.90533
AAEL019759	Stress	Ox-Stress	SOD	SODCuZn	high	-	CG5948	x	28.171	100	47.5575	47.6288	1.6254	x	0.457891	1.6254	0.772999	0.774158
AAEL019938	Stress	Ox-Stress	SOD	SODCuZn	high	CUSOD4	-	x	56.1487	70.9582	100	81.9184	1.25592	x	0.705183	0.891178	1.25592	1.02883
AAEL019937	Stress	Ox-Stress	SOD	SODCuZn	high	-	Sod1	x	41.6046	39.7476	34.5703	100	407.536	x	169.554	161.985	140.886	407.536
AAEL019761	Stress	Ox-Stress	SOD	SODCuZn	high	-	CG5948	x	0	0	0	0	0	x	0	0	0	0
AAEL025388	Stress	Ox-Stress	SOD	SODMnFe	high	-	Sod2	x	40.0186	50.7981	31.0434	100	70.715	x	28.2992	35.9219	21.9523	70.715
AAEL004823	Stress	Ox-Stress	SOD	SODMnFe	high	MNSOD1	Sod2	x	0	0	0	0	0	x	0	0	0	0
AAEL005108	Stress	Ox-Stress	SOD	SODMnFe	high	MNSOD2	Sod2	x	0	0	0	0	0.0425503	x	0.0425503	0	0	0

## Sheet: BF Regions
Gene ID	SubClass	Superfamily	Family	Subfamily	Confidence	VB Symbol	Dmel Ortholog		Relative Expression				Max TPM		TPM
									SF Ant	BF Ant	SF Post	BF Post			SF Ant	BF Ant	SF Post	BF Post
AAEL022443	Autophagy	AutoPha	APHAG	Aphag_other	high	-	Aduk	x	100	82.1277	58.8849	66.894	5.28245	x	5.28245	4.33835	3.11057	3.53364
AAEL012306	Autophagy	AutoPha	APHAG	Aphag_other	high	APG7B	Uba3	x	86.6029	100	28.7996	13.4607	13.1347	x	11.375	13.1347	3.78273	1.76802
AAEL020638	Autophagy	AutoPha	APHAG	Aphag_other	high	-	Tor	x	81.1487	100	32.2236	17.7242	12.3385	x	10.0125	12.3385	3.97591	2.1869
AAEL010641	Autophagy	AutoPha	APHAG	Aphag_other	high	APG7A	Uba2	x	58.5258	100	29.4109	33.9297	31.846	x	18.6381	31.846	9.3662	10.8053
AAEL005985	Autophagy	AutoPha	APHAG	Atg	high	-	Atg13	x	100	80.5573	76.5107	52.9339	197.869	x	197.869	159.398	151.391	104.74
AAEL003777	Autophagy	AutoPha	APHAG	Atg	high	-	Atg2	x	100	87.2739	29.0615	97.5861	71.5283	x	71.5283	62.4255	20.7872	69.8017
AAEL010427	Autophagy	AutoPha	APHAG	Atg	high	APG6	Atg6	x	83.0616	100	51.3611	23.4528	5.59379	x	4.64629	5.59379	2.87303	1.3119
AAEL009089	Autophagy	AutoPha	APHAG	Atg	high	APG12	Atg12	x	52.5687	100	25.945	65.1071	12.4741	x	6.55745	12.4741	3.2364	8.1215
AAEL019922	Autophagy	AutoPha	APHAG	Atg	high	-	Atg1	x	99.3645	100	42.657	58.7929	13.0394	x	12.9565	13.0394	5.56221	7.66623
AAEL018348	Autophagy	AutoPha	APHAG	Atg	high	-	Atg17	x	98.8806	100	32.4869	62.8788	26.6553	x	26.3569	26.6553	8.65948	16.7605
AAEL000955	Autophagy	AutoPha	APHAG	Atg	high	APG3	Atg3	x	91.4039	100	28.1372	55.2673	22.6406	x	20.6944	22.6406	6.37043	12.5129
AAEL002286	Autophagy	AutoPha	APHAG	Atg	high	APG5	Atg5	x	89.9841	100	50.5642	52.7627	4.52522	x	4.07198	4.52522	2.28814	2.38763
AAEL019779	Autophagy	AutoPha	APHAG	Atg	high	-	Atg16	x	87.5292	100	38.0236	25.2661	7.03039	x	6.15364	7.03039	2.67321	1.7763
AAEL009814	Autophagy	AutoPha	APHAG	Atg	high	-	Atg7	x	86.0819	100	26.7013	76.17	7.20207	x	6.19968	7.20207	1.92305	5.48582
AAEL013995	Autophagy	AutoPha	APHAG	Atg	high	APG18B	Atg18a	x	84.1411	100	39.5176	68.6036	28.5777	x	24.0456	28.5777	11.2932	19.6054
AAEL009105	Autophagy	AutoPha	APHAG	Atg	high	APG9	Atg9	x	81.4097	100	41.1602	85.2506	35.1258	x	28.5958	35.1258	14.4578	29.9449
AAEL023227	Autophagy	AutoPha	APHAG	Atg	high	-	Atg4a	x	78.9437	100	23.8992	80.8492	6.20845	x	4.90118	6.20845	1.48377	5.01948
AAEL010516	Autophagy	AutoPha	APHAG	Atg	high	APG4A	Atg4b	x	74.7745	100	39.3792	66.6107	5.50907	x	4.11938	5.50907	2.16942	3.66963
AAEL027731	Autophagy	AutoPha	APHAG	Atg	high	-	Atg14	x	63.5049	100	33.8495	53.3169	14.7357	x	9.35791	14.7357	4.98797	7.85663
AAEL021061	Autophagy	AutoPha	APHAG	Atg	high	-	Atg10	x	57.4956	100	23.6181	28.3501	4.14996	x	2.38604	4.14996	0.980139	1.17652
AAEL013063	Autophagy	AutoPha	APHAG	Atg	high	APG18A	Atg18b	x	56.2063	100	6.41545	78.388	18.7308	x	10.5279	18.7308	1.20166	14.6827
AAEL007228	Autophagy	AutoPha	APHAG	Atg	high	APG4B	Atg4a	x	0	100	11.0446	32.4072	1.67436	x	0	1.67436	0.184927	0.542615
AAEL007162	Autophagy	AutoPha	APHAG	Atg	high	APG8	Atg8a	x	77.6579	91.1658	23.3729	100	140.631	x	109.211	128.207	32.8695	140.631
AAEL027281	Effector Molecules	AntiMic	AMP	Attacin	high	-	AttA	x	0	0	0	0	0	x	0	0	0	0
AAEL003389	Effector Molecules	AntiMic	AMP	Attacin	high	ATT	AttA	x	0	0	0	0	0.305302	x	0.0934372	0	0.305302	0.124451
AAEL004833	Effector Molecules	AntiMic	AMP	Attacin	high	DPT1	DptA	x	0	0	0	0	0.124451	x	0	0	0	0.124451
AAEL012805	Effector Molecules	AntiMic	AMP	Cathelicidin	high	-	Camp	x	0	0	0	0	0	x	0	0	0	0
AAEL024595	Effector Molecules	AntiMic	AMP	Cathelicidin	high	-	Camp	x	0	0	0	0	0.382392	x	0.240436	0.134845	0.382392	0.0981425
AAEL029038	Effector Molecules	AntiMic	AMP	Cecropin	high	CECA	-	x	30.18	100	6.95882	10.3421	23.0279	x	6.94982	23.0279	1.60247	2.38156
AAEL029047	Effector Molecules	AntiMic	AMP	Cecropin	high	CECN	-	x	13.7982	100	4.2997	6.66482	165.782	x	22.875	165.782	7.12814	11.0491
AAEL029046	Effector Molecules	AntiMic	AMP	Cecropin	high	CECD	-	x	10.0102	100	6.0381	9.51883	25.4277	x	2.54537	25.4277	1.53535	2.42042
AAEL029041	Effector Molecules	AntiMic	AMP	Cecropin	high	-	-	x	6.75073	100	2.35752	6.29221	301.209	x	20.3338	301.209	7.10104	18.9527
AAEL029044	Effector Molecules	AntiMic	AMP	Cecropin	high	CECE	-	x	6.64139	100	2.07217	14.2666	11.3546	x	0.7541	11.3546	0.235286	1.61991
AAEL003857	Effector Molecules	AntiMic	AMP	Defensin	high	DEFD	Def	x	13.4462	100	2.91055	20.8415	205.248	x	27.5981	205.248	5.97383	42.7766
AAEL003832	Effector Molecules	AntiMic	AMP	Defensin	high	DEFC	Def	x	16.5912	100	5.56135	45.8755	46.9599	x	7.79122	46.9599	2.61161	21.5431
AAEL003841	Effector Molecules	AntiMic	AMP	Defensin	high	DEFA	Def	x	27.9151	80.3795	0.388547	100	253	x	70.5451	203.129	0.981907	252.713
AAEL004522	Effector Molecules	AntiMic	AMP	Gambicin	high	GAM1	-	x	65.1384	100	0.094296	0.322721	35707.2	x	23259.1	35707.2	33.6705	115.235
AAEL017536	Effector Molecules	AntiMic	AMP	Holotricin	high	GRRP	-	x	100	31.8669	3.54247	17.0469	11.2573	x	11.2573	3.58735	0.398786	1.91903
AAEL015404	Effector Molecules	AntiMic	LYS	LYSC	high	LYSC7B	CG11159	x	84.5624	100	11.7753	1.62274	220.475	x	186.439	220.475	25.9615	3.57772
AAEL017132	Effector Molecules	AntiMic	LYS	LYSC	high	LYSC4	CG11159	x	26.9734	100	2.55906	14.268	102.434	x	27.63	102.434	2.62135	14.6153
AAEL003723	Effector Molecules	AntiMic	LYS	LYSC	high	LYSC11	-	x	18.1288	100	2.8236	14.232	681.848	x	123.611	681.848	19.2526	97.0408
AAEL003712	Effector Molecules	AntiMic	LYS	LYSC	high	LYSC10	-	x	6.91586	100	3.66217	9.23543	6.87241	x	0.475287	6.87241	0.25168	0.634697
AAEL025888	Effector Molecules	AntiMic	LYS	LYSI	high	-	CG6421	x	0	0	0	0	0.454091	x	0.454091	0.27502	0.235286	0.135383
AAEL001485	Effector Molecules	AntiMic	LYS	LYSI	high	-	CG14823	x	0	0	0	0	0.252983	x	0.120218	0.252983	0.0717849	0
AAEL019435	Effector Molecules	AntiMic	LYS	LYSlong	high	LYSC6	CG8492	x	0	0	0	0	0.0735532	x	0	0	0.0735532	0
AAEL009745	Effector Molecules	EffEnzy	NO	NOS	high	-	Nos	x	36.4343	100	3.92884	2.3841	4.11654	x	1.49983	4.11654	0.161732	0.0981425
AAEL013492	Effector Molecules	EffEnzy	PPO	PPO	high	PPO5	PPO1	x	86.7018	100	29.0144	39.4097	4.79077	x	4.15368	4.79077	1.39001	1.88803
AAEL015116	Effector Molecules	EffEnzy	PPO	PPO	high	-	PPO1	x	0	0	0	0	0.511295	x	0.447927	0.511295	0.0717849	0.124451
AAEL015113	Effector Molecules	EffEnzy	PPO	PPO	high	-	PPO1	x	0	0	0	0	0.213655	x	0.213655	0	0	0
AAEL020579	Effector Molecules	EffEnzy	PPO	PPO	high	-	PPO1	x	0	0	0	0	0.134845	x	0	0.134845	0	0
AAEL011764	Effector Molecules	EffEnzy	PPO	PPO	high	PPO10	PPO1	x	0	0	0	0	0.228107	x	0.228107	0	0.0717849	0
AAEL011763	Effector Molecules	EffEnzy	PPO	PPO	high	PPO3	PPO1	x	0	0	0	0	0.236275	x	0	0.236275	0.0899474	0
AAEL013501	Effector Molecules	EffEnzy	PPO	PPO	high	PPO4	PPO1	x	0	0	0	0	0.333873	x	0.333873	0	0.163501	0
AAEL014544	Effector Molecules	EffEnzy	PPO	PPO	high	PPO6	PPO2	x	0	0	0	0	0.27502	x	0.120218	0.27502	0	0
AAEL013493	Effector Molecules	EffEnzy	PPO	PPO	high	PPO7	PPO1	x	0	0	0	0	0	x	0	0	0	0
AAEL013496	Effector Molecules	EffEnzy	PPO	PPO	high	PPO8	PPO1	x	0	0	0	0	0	x	0	0	0	0
AAEL007563	Effector Molecules	EffEnzy	PRDX	DUOX	high	DUOX	Duox	x	0	0	0	0	0.0934372	x	0.0934372	0	0	0
AAEL002039	Effector Molecules	EffEnzy	PRDX	NOX	high	-	Nox	x	0	0	0	0	0.409865	x	0	0.409865	0.0735532	0.135383
AAEL027984	Modulation	CascMod	CLIP	atypicalCLIP	low	-	-	x	5.53605	100	2.3698	65.2279	16.9025	x	0.935729	16.9025	0.400554	11.0251
AAEL019767	Modulation	CascMod	CLIP	CLIP_other	high	-	Sp7	x	100	37.1539	12.043	6.23946	3.14587	x	3.14587	1.16881	0.378855	0.196285
AAEL002595	Modulation	CascMod	CLIP	CLIP_other	high	-	CG5390	x	100	95.3945	9.88071	15.1329	1.47093	x	1.47093	1.40318	0.145338	0.222594
AAEL019853	Modulation	CascMod	CLIP	CLIP_other	high	-	Hayan	x	100	20.907	0	11.9795	1.13012	x	1.13012	0.236275	0	0.135383
AAEL022578	Modulation	CascMod	CLIP	CLIP_other	high	-	CG9737	x	100	42.7677	3.86698	3.2534	7.98655	x	7.98655	3.41567	0.308839	0.259834
AAEL002593	Modulation	CascMod	CLIP	CLIP_other	high	-	CG40160	x	60.797	100	13.3177	12.5582	1.07804	x	0.655417	1.07804	0.14357	0.135383
AAEL003279	Modulation	CascMod	CLIP	CLIP_other	high	-	grass	x	59.8691	100	6.5572	60.8343	1.09475	x	0.655417	1.09475	0.0717849	0.665984
AAEL025028	Modulation	CascMod	CLIP	CLIP_other	high	-	grass	x	55.5756	100	18.4126	0	1.57868	x	0.877359	1.57868	0.290676	0
AAEL002600	Modulation	CascMod	CLIP	CLIP_other	high	-	CG5390	x	53.2632	100	1.21767	11.0253	6.04049	x	3.21736	6.04049	0.0735532	0.665984
AAEL024669	Modulation	CascMod	CLIP	CLIP_other	high	-	-	x	35.9618	100	2.5562	9.64174	2.80827	x	1.00991	2.80827	0.0717849	0.270766
AAEL002629	Modulation	CascMod	CLIP	CLIP_other	high	-	CG5390	x	32.5322	100	10.2142	37.913	1.60071	x	0.520748	1.60071	0.163501	0.606879
AAEL017003	Modulation	CascMod	CLIP	CLIP_other	high	-	grass	x	32.2925	100	10.3458	22.3697	2.27422	x	0.734403	2.27422	0.235286	0.508736
AAEL015465	Modulation	CascMod	CLIP	CLIP_other	high	-	CG9737	x	19.4704	100	0	5.96693	2.26889	x	0.441762	2.26889	0	0.135383
AAEL019781	Modulation	CascMod	CLIP	CLIP_other	high	-	-	x	33.6718	90.7256	15.6446	100	11.8219	x	3.98067	10.7255	1.8495	11.8219
AAEL002128	Modulation	CascMod	CLIP	CLIP_other	high	-	CG32260	x	0	0	0	0	0.114053	x	0.114053	0	0.0735532	0
AAEL002288	Modulation	CascMod	CLIP	CLIP_other	high	-	-	x	0	0	0	0	0.786314	x	0	0.786314	0.290676	0.135383
AAEL002577	Modulation	CascMod	CLIP	CLIP_other	high	-	-	x	0	0	0	0	0	x	0	0	0	0
AAEL018159	Modulation	CascMod	CLIP	CLIP_other	high	-	scaf	x	0	0	0	0	0.280312	x	0.280312	0	0.0735532	0.124451
AAEL019768	Modulation	CascMod	CLIP	CLIP_other	high	-	CG11313	x	0	0	0	0	0	x	0	0	0	0
AAEL026876	Modulation	CascMod	CLIP	CLIP_other	high	-	Hayan	x	0	0	0	0	0	x	0	0	0	0
AAEL026937	Modulation	CascMod	CLIP	CLIP_other	high	-	-	x	0	0	0	0	0.114053	x	0.114053	0	0	0
AAEL015637	Modulation	CascMod	CLIP	CLIP_other	high	-	Sp7	x	0	0	0	0	0.252983	x	0	0.252983	0	0
AAEL002632	Modulation	CascMod	CLIP	CLIP_other	high	-	-	x	0	0	0	0	0.120218	x	0.120218	0	0	0
AAEL002580	Modulation	CascMod	CLIP	CLIPA	high	-	CG9377	x	37.0924	100	41.2898	0	1.1354	x	0.421146	1.1354	0.468803	0
AAEL002301	Modulation	CascMod	CLIP	CLIPA	high	-	-	x	26.25	82.4011	3.01209	100	5.42815	x	1.42489	4.47286	0.163501	5.42815
AAEL002590	Modulation	CascMod	CLIP	CLIPA	high	-	-	x	0	0	0	0	0.40053	x	0.40053	0.156882	0.179895	0
AAEL022775	Modulation	CascMod	CLIP	CLIPA	high	-	CG9377	x	0	0	0	0	0	x	0	0	0	0
AAEL002601	Modulation	CascMod	CLIP	CLIPA	high	CLIPA1	CG9377	x	0	0	0	0	0.893793	x	0.307092	0.893793	0.179895	0.124451
AAEL001675	Modulation	CascMod	CLIP	CLIPA	high	CLIPA10	CG4998	x	0	0	0	0	0.134845	x	0	0.134845	0.0717849	0
AAEL002126	Modulation	CascMod	CLIP	CLIPA	high	CLIPA15	mas	x	0	0	0	0	0	x	0	0	0	0
AAEL008404	Modulation	CascMod	CLIP	CLIPA	high	CLIPA16	CG9377	x	0	0	0	0	0.426572	x	0.0934372	0.426572	0.253448	0
AAEL007006	Modulation	CascMod	CLIP	CLIPA	high	CLIPA17	-	x	0	0	0	0	0.937867	x	0.414981	0.937867	0.161732	0.124451
AAEL005718	Modulation	CascMod	CLIP	CLIPA	high	CLIPA3	CG13318	x	0	0	0	0	0.135383	x	0.120218	0	0	0.135383
AAEL020706	Modulation	CascMod	CLIP	CLIPA	high	-	CG9377	x	0	0	0	0	0.307092	x	0.307092	0.252983	0	0
AAEL002624	Modulation	CascMod	CLIP	CLIPA	high	-	-	x	0	0	0	0	0.841767	x	0.454091	0.841767	0.0899474	0
AAEL014349	Modulation	CascMod	CLIP	CLIPB	high	CLIPB15	-	x	100	84.4281	33.9055	21.4341	3.16651	x	3.16651	2.67343	1.07362	0.678713
AAEL001077	Modulation	CascMod	CLIP	CLIPB	high	CLIPB45	-	x	100	18.5023	29.1603	3.01633	7.74205	x	7.74205	1.43245	2.2576	0.233526
AAEL005064	Modulation	CascMod	CLIP	CLIPB	high	CLIPB5	CG3505	x	100	47.6019	1.79571	3.03832	4.09605	x	4.09605	1.9498	0.0735532	0.124451
AAEL000028	Modulation	CascMod	CLIP	CLIPB	high	CLIPB34	-	x	100	76.2485	21.4126	23.2927	5.1258	x	5.1258	3.90835	1.09757	1.19394
AAEL000760	Modulation	CascMod	CLIP	CLIPB	high	CLIPB30	-	x	61.1968	100	0	5.74887	5.76928	x	3.53062	5.76928	0	0.331668
AAEL000037	Modulation	CascMod	CLIP	CLIPB	high	CLIPB35	-	x	26.4031	100	5.33352	0	2.75815	x	0.728238	2.75815	0.147106	0
AAEL006161	Modulation	CascMod	CLIP	CLIPB	high	CLIPB31	-	x	82.927	100	9.40931	32.6555	3.88974	x	3.22565	3.88974	0.365998	1.27022
AAEL007993	Modulation	CascMod	CLIP	CLIPB	high	CLIPB27	-	x	77.9467	100	34.1389	29.8758	146.436	x	114.142	146.436	49.9914	43.7488
AAEL000074	Modulation	CascMod	CLIP	CLIPB	high	CLIPB1	ea	x	55.5419	100	24.791	10.9703	2.12872	x	1.18233	2.12872	0.52773	0.233526
AAEL000038	Modulation	CascMod	CLIP	CLIPB	high	CLIPB6	-	x	50.8371	100	20.8093	19.1715	96.2884	x	48.9503	96.2884	20.037	18.4599
AAEL006674	Modulation	CascMod	CLIP	CLIPB	high	CLIPB29	-	x	21.3852	100	4.55598	11.2217	3.19005	x	0.682198	3.19005	0.145338	0.357977
AAEL005431	Modulation	CascMod	CLIP	CLIPB	high	CLIPB37	-	x	20.7376	100	14.5258	12.4382	1.00055	x	0.207491	1.00055	0.145338	0.124451
AAEL005093	Modulation	CascMod	CLIP	CLIPB	high	CLIPB46	-	x	11.7107	100	0.62239	1.46793	49.3373	x	5.77774	49.3373	0.30707	0.724238
AAEL000099	Modulation	CascMod	CLIP	CLIPB	high	CLIPB33	-	x	0	100	0	58.83	1.19085	x	0	1.19085	0	0.700577
AAEL003632	Modulation	CascMod	CLIP	CLIPB	high	CLIPB39	CG9737	x	0	100	0	0	1.17414	x	0	1.17414	0	0
AAEL001084	Modulation	CascMod	CLIP	CLIPB	high	CLIPB21	-	x	6.96231	100	3.35114	27.6542	2.68409	x	0.186874	2.68409	0.0899474	0.742262
AAEL008668	Modulation	CascMod	CLIP	CLIPB	high	CLIPB22	-	x	3.5151	7.92235	18.0968	100	6.66472	x	0.234271	0.528002	1.2061	6.66472
AAEL007992	Modulation	CascMod	CLIP	CLIPB	high	-	-	x	5.36765	36.9889	13.3264	100	15.8068	x	0.848456	5.84677	2.10648	15.8068
AAEL003243	Modulation	CascMod	CLIP	CLIPB	high	CLIPB13A	grass	x	0	0	0	0	0.893793	x	0.541364	0.893793	0.218891	0.270766
AAEL003253	Modulation	CascMod	CLIP	CLIPB	high	CLIPB13B	grass	x	0	0	0	0	0.236275	x	0	0.236275	0	0.0981425
AAEL005648	Modulation	CascMod	CLIP	CLIPB	high	CLIPB16	CG17572	x	0	0	0	0	0.14357	x	0	0	0.14357	0.135383
AAEL015430	Modulation	CascMod	CLIP	CLIPB	high	CLIPB19	-	x	0	0	0	0	0.971282	x	0.228107	0.971282	0	0.124451
AAEL014137	Modulation	CascMod	CLIP	CLIPB	high	CLIPB25	-	x	0	0	0	0	0.313765	x	0	0.313765	0	0
AAEL013245	Modulation	CascMod	CLIP	CLIPB	high	CLIPB28	-	x	0	0	0	0	0.522673	x	0.0934372	0.522673	0	0
AAEL003628	Modulation	CascMod	CLIP	CLIPB	high	CLIPB38	-	x	0	0	0	0	0.156882	x	0.0934372	0.156882	0	0
AAEL003631	Modulation	CascMod	CLIP	CLIPB	high	CLIPB41	CG9737	x	0	0	0	0	0	x	0	0	0	0
AAEL006168	Modulation	CascMod	CLIP	CLIPB	high	CLIPB42	-	x	0	0	0	0	0.662847	x	0.0934372	0.662847	0	0.124451
AAEL014354	Modulation	CascMod	CLIP	CLIPB	high	CLIPB43	-	x	0	0	0	0	0.723629	x	0.373749	0.723629	0.0899474	0.606879
AAEL005060	Modulation	CascMod	CLIP	CLIPB	high	CLIPB44	CG34409	x	0	0	0	0	0	x	0	0	0	0
AAEL014139	Modulation	CascMod	CLIP	CLIPB	high	-	-	x	0	0	0	0	0	x	0	0	0	0
AAEL007593	Modulation	CascMod	CLIP	CLIPC	high	CLIPC2	snk	x	100	19.8077	8.98094	0	6.03897	x	6.03897	1.19618	0.542356	0
AAEL011991	Modulation	CascMod	CLIP	CLIPC	high	CLIPC1	snk	x	100	73.6442	5.15224	19.6486	2.82087	x	2.82087	2.07741	0.145338	0.554262
AAEL012713	Modulation	CascMod	CLIP	CLIPC	high	CLIPC16	Hayan	x	100	80.3497	23.7821	10.2454	6.83793	x	6.83793	5.49426	1.6262	0.700577
AAEL007597	Modulation	CascMod	CLIP	CLIPC	high	CLIPC3	snk	x	100	96.1007	27.8634	16.1288	3.97719	x	3.97719	3.8221	1.10818	0.641472
AAEL012712	Modulation	CascMod	CLIP	CLIPC	high	CLIPC13	Hayan	x	59.7816	100	56.4626	18.5322	7.05505	x	4.21762	7.05505	3.98346	1.30746
AAEL011593	Modulation	CascMod	CLIP	CLIPC	high	CLIPC11	snk	x	0	0	0	0	0	x	0	0	0	0
AAEL012711	Modulation	CascMod	CLIP	CLIPC	high	CLIPC12	-	x	0	0	0	0	0.561417	x	0.228107	0.561417	0.161732	0.222594
AAEL004524	Modulation	CascMod	CLIP	CLIPC	high	CLIPC5B	Hayan	x	0	0	0	0	0.803022	x	0.661582	0.803022	0.397018	0.0981425
AAEL014350	Modulation	CascMod	CLIP	CLIPC	high	-	-	x	0	0	0	0	0.354412	x	0.240436	0.354412	0	0
AAEL002124	Modulation	CascMod	CLIP	CLIPD	high	CLIPD6	CG7432	x	100	6.16592	1.12581	1.95178	6.37629	x	6.37629	0.393157	0.0717849	0.124451
AAEL019590	Modulation	CascMod	CLIP	CLIPD	high	-	-	x	7.57819	23.6604	31.1572	100	1.23297	x	0.0934372	0.291727	0.38416	1.23297
AAEL025309	Modulation	CascMod	CLIP	CLIPD	high	-	-	x	0	0	0	0	0.118137	x	0	0.118137	0.0735532	0
AAEL007796	Modulation	CascMod	CLIP	CLIPD	high	CLIPD1	CG9372	x	0	0	0	0	0.775655	x	0.186874	0.775655	0.0717849	0.222594
AAEL015109	Modulation	CascMod	CLIP	CLIPD	high	CLIPD10	CG8170	x	0	0	0	0	0	x	0	0	0	0
AAEL011375	Modulation	CascMod	CLIP	CLIPD	high	-	-	x	0	0	0	0	0	x	0	0	0	0
AAEL004979	Modulation	CascMod	CLIP	CLIPD	high	CLIPD2	l(2)k05911	x	0	0	0	0	0.959305	x	0.928798	0.764277	0.959305	0.320736
AAEL002997	Modulation	CascMod	CLIP	CLIPD	high	CLIPD3	CG7432	x	0	0	0	0	0.118137	x	0	0.118137	0	0
AAEL000224	Modulation	CascMod	CLIP	CLIPD	high	-	CG13744	x	0	0	0	0	0	x	0	0	0	0
AAEL005906	Modulation	CascMod	CLIP	CLIPD	high	-	Sb	x	0	0	0	0	0	x	0	0	0	0
AAEL000238	Modulation	CascMod	CLIP	CLIPD	high	CLIPD9	CG8172	x	0	0	0	0	0	x	0	0	0	0
AAEL005792	Modulation	CascMod	CLIP	CLIPE	high	CLIPE8	-	x	50.4148	100	2.91004	0.999163	12.4555	x	6.27943	12.4555	0.362461	0.124451
AAEL018347	Modulation	CascMod	CLIP	CLIPE	high	CLIPE12	-	x	40.6009	100	25.3096	66.5075	2.30725	x	0.936765	2.30725	0.583955	1.53449
AAEL001233	Modulation	CascMod	CLIP	CLIPE	high	CLIPE9	-	x	0	0	0	0	0.291727	x	0.0934372	0.291727	0.0717849	0
AAEL004995	Modulation	CascMod	DREP	DREP	high	-	Drep4	x	100	81.7062	65.393	41.2012	4.04656	x	4.04656	3.30629	2.64616	1.66723
AAEL006265	Modulation	CascMod	DREP	DREP	high	-	Drep2	x	0	0	0	0	0.240436	x	0.240436	0.156882	0	0.0981425
AAEL014825	Modulation	CascMod	DREP	DREP	high	-	Drep1	x	0	0	0	0	0.426572	x	0.307092	0.426572	0.0735532	0
AAEL023229	Modulation	CascMod	initiator SP	ModSP	high	-	modSP	x	45.3297	100	6.75498	0	2.42044	x	1.09718	2.42044	0.163501	0
AAEL028034	Modulation	CascMod	SRPN	SRPN	high	-	Spn77Ba	x	100	94.6734	40.4841	31.0026	4.42513	x	4.42513	4.18942	1.79147	1.3719
AAEL003697	Modulation	CascMod	SRPN	SRPN	high	SRPN17	-	x	100	99.1682	31.0596	19.3666	1.39811	x	1.39811	1.38648	0.434246	0.270766
AAEL002720	Modulation	CascMod	SRPN	SRPN	high	SRPN20	-	x	100	76.5068	16.6978	22.7621	1.40908	x	1.40908	1.07804	0.235286	0.320736
AAEL013936	Modulation	CascMod	SRPN	SRPN	high	SRPN4	Spn28Dc	x	100	88.9299	36.8635	16.2446	2.74053	x	2.74053	2.43715	1.01026	0.445187
AAEL011777	Modulation	CascMod	SRPN	SRPN	high	SRPN8	Spn77Ba	x	100	94.6734	40.4841	31.0026	4.42513	x	4.42513	4.18942	1.79147	1.3719
AAEL010769	Modulation	CascMod	SRPN	SRPN	high	SRPN6	Spn28Dc	x	19.8513	100	8.53056	12.5825	2.75815	x	0.547528	2.75815	0.235286	0.347045
AAEL007420	Modulation	CascMod	SRPN	SRPN	high	SRPN25	-	x	83.7902	100	32.6861	46.2121	7.9902	x	6.695	7.9902	2.61169	3.69244
AAEL020823	Modulation	CascMod	SRPN	SRPN	high	-	-	x	57.6178	100	14.3641	16.2379	5.68528	x	3.27573	5.68528	0.816638	0.923171
AAEL008364	Modulation	CascMod	SRPN	SRPN	high	SRPN9	Spn88Ea	x	54.9053	100	7.79823	11.205	6.72195	x	3.69071	6.72195	0.524193	0.753194
AAEL007765	Modulation	CascMod	SRPN	SRPN	high	SRPN10	Spn55B	x	53.1568	100	31.7601	86.7785	267.091	x	141.977	267.091	84.8286	231.778
AAEL014138	Modulation	CascMod	SRPN	SRPN	high	SRPN16	Spn28Dc	x	46.5161	100	19.4155	0	4.5712	x	2.12634	4.5712	0.88752	0
AAEL014141	Modulation	CascMod	SRPN	SRPN	high	SRPN5	Spn28Dc	x	17.869	100	2.28853	0	3.21399	x	0.574309	3.21399	0.0735532	0
AAEL014078	Modulation	CascMod	SRPN	SRPN	high	-	Spn27A	x	64.8068	100	3.38445	2.34136	5.31534	x	3.4447	5.31534	0.179895	0.124451
AAEL024006	Modulation	CascMod	SRPN	SRPN	high	-	-	x	0	0	0	0	0	x	0	0	0	0
AAEL014079	Modulation	CascMod	SRPN	SRPN	high	-	Spn27A	x	0	0	0	0	0.134845	x	0.0934372	0.134845	0.0899474	0
AAEL027145	Modulation	CascMod	SRPN	SRPN	high	-	CG43366	x	0	0	0	0	0.348325	x	0.348325	0.27502	0	0
AAEL003653	Modulation	CascMod	SRPN	SRPN	high	SRPN12	Spn100A	x	0	0	0	0	0	x	0	0	0	0
AAEL002731	Modulation	CascMod	SRPN	SRPN	high	SRPN14	-	x	0	0	0	0	0.118137	x	0	0.118137	0.0735532	0
AAEL006137	Modulation	CascMod	SRPN	SRPN	high	SRPN19	Spn85F	x	0	0	0	0	0.321544	x	0.321544	0.118137	0	0.124451
AAEL002730	Modulation	CascMod	SRPN	SRPN	high	SRPN21	-	x	0	0	0	0	0.156882	x	0	0.156882	0.0735532	0
AAEL002704	Modulation	CascMod	SRPN	SRPN	high	SRPN23	-	x	0	0	0	0	0.745667	x	0	0.745667	0	0
AAEL017249	Modulation	CascMod	SRPN	SRPN	high	SRPN24	Spn42Da	x	0	0	0	0	0	x	0	0	0	0
AAEL003182	Modulation	CascMod	SRPN	SRPN	high	SRPN26	-	x	0	0	0	0	0.470647	x	0	0.470647	0	0
AAEL005665	Modulation	CascMod	SRPN	SRPN	high	SRPN3	-	x	0	0	0	0	0.236275	x	0	0.236275	0.0899474	0
AAEL002699	Modulation	CascMod	SRPN	SRPN	high	SRPN7	-	x	0	0	0	0	0	x	0	0	0	0
AAEL003541	Recognition	ClasRec	GALE	GALE	high	GALE1	galectin	x	100	91.6892	36.7606	32.0832	64.4734	x	64.4734	59.1152	23.7008	20.6852
AAEL004196	Recognition	ClasRec	GALE	GALE	high	GALE3	Pex23	x	100	77.432	29.0466	37.6577	14.5606	x	14.5606	11.2745	4.22935	5.48317
AAEL012135	Recognition	ClasRec	GALE	GALE	high	GALE2	CG5335	x	100	76.8918	27.2008	9.29631	195.041	x	195.041	149.97	53.0527	18.1316
AAEL003844	Recognition	ClasRec	GALE	GALE	high	GALE5	-	x	69.6433	100	31.0937	18.5259	305.593	x	212.825	305.593	95.0204	56.614
AAEL005293	Recognition	ClasRec	GALE	GALE	high	GALE8A	-	x	45.8743	100	47.5588	44.6376	612.702	x	281.073	612.702	291.394	273.495
AAEL009850	Recognition	ClasRec	GALE	GALE	high	GALE14	-	x	37.0927	100	19.6358	17.2128	29.3581	x	10.8897	29.3581	5.76471	5.05336
AAEL012003	Recognition	ClasRec	GALE	GALE	high	GALE6B	-	x	20.7628	100	3.35529	36.7861	4.38431	x	0.910305	4.38431	0.147106	1.61282
AAEL026564	Recognition	ClasRec	GALE	GALE	high	-	galectin	x	0	36.1275	100	38.0583	7.24705	x	0	2.61818	7.24705	2.75811
AAEL009842	Recognition	ClasRec	GALE	GALE	high	GALE12	-	x	81.8462	94.8298	75.5714	100	75.3339	x	61.6579	71.4389	56.9309	75.3339
AAEL003840	Recognition	ClasRec	GALE	GALE	high	GALE11	-	x	0	0	0	0	0	x	0	0	0	0
AAEL007626	Recognition	ClasRec	GNBP	GNBPA	high	GNBPA1	GNBP1	x	0	0	0	0	0.213655	x	0.213655	0.118137	0	0
AAEL000652	Recognition	ClasRec	GNBP	GNBPA	high	GNBPA2	GNBP1	x	0	0	0	0	0	x	0	0	0	0
AAEL003889	Recognition	ClasRec	GNBP	GNBPB	high	GNBPB1	-	x	40.2436	100	36.7103	34.9274	10.5927	x	4.2629	10.5927	3.88863	3.69977
AAEL010270	Recognition	ClasRec	GNBP	GNBPB	high	-	-	x	23.3892	100	3.31411	60.8625	2.71407	x	0.634801	2.71407	0.0899474	1.65185
AAEL022879	Recognition	ClasRec	GNBP	GNBPB	high	-	-	x	0	0	1.16574	100	7.71594	x	0	0	0.0899474	7.71594
AAEL009176	Recognition	ClasRec	GNBP	GNBPB	high	GNBPB3	-	x	0	0	0	0	0	x	0	0	0	0
AAEL009178	Recognition	ClasRec	GNBP	GNBPB	high	GNBPB4	-	x	0	0	0	0	0	x	0	0	0	0
AAEL003894	Recognition	ClasRec	GNBP	GNBPB	high	GNBPB5	-	x	0	0	0	0	0	x	0	0	0	0
AAEL007064	Recognition	ClasRec	GNBP	GNBPB	high	GNBPB6	-	x	0	0	0	0	0.522673	x	0	0.522673	0	0
AAEL012007	Recognition	ClasRec	PGRP	atypicalPGRP	high	-	-	x	71.1572	100	11.813	9.30261	272.77	x	194.096	272.77	32.2224	25.3748
AAEL027982	Recognition	ClasRec	PGRP	PGRPL	high	PGRP-LE	PGRP-LE	x	100	84.4447	47.458	37.9081	64.8417	x	64.8417	54.7554	30.7726	24.5803
AAEL014640	Recognition	ClasRec	PGRP	PGRPL	high	PGRPLC	PGRP-LF	x	93.9713	100	53.2096	45.1609	239.784	x	225.328	239.784	127.588	108.289
AAEL021026	Recognition	ClasRec	PGRP	PGRPL	high	-	PGRP-LA	x	73.7747	100	82.8484	50.7134	3.3097	x	2.44172	3.3097	2.74203	1.67846
AAEL019745	Recognition	ClasRec	PGRP	PGRPL	high	-	PGRP-LD	x	54.3465	100	0.222273	0.267035	138.15	x	75.0797	138.15	0.30707	0.368909
AAEL010171	Recognition	ClasRec	PGRP	PGRPL	high	PGRPLB	PGRP-LB	x	75.3022	100	1.66652	8.77977	2880.86	x	2169.35	2880.86	48.0102	252.933
AAEL012380	Recognition	ClasRec	PGRP	PGRPL	high	PGRPLA	PGRP-LA	x	0	0	0	0	0.949884	x	0	0.188783	0.949884	0.0676916
AAEL011551	Recognition	ClasRec	PGRP	PGRPS	high	-	CG9380	x	93.3833	100	47.7368	30.4308	590.82	x	551.728	590.82	282.039	179.792
AAEL009474	Recognition	ClasRec	PGRP	PGRPS	high	PGRPS1	PGRP-SA	x	1.12338	18.8097	3.3332	100	733.387	x	8.23875	137.948	24.4453	733.387
AAEL007039	Recognition	ClasRec	PGRP	PGRPS	high	PGRP-SC1	PGRP-SC1a	x	0.443949	1.74745	4.57697	100	81.7207	x	0.362798	1.42803	3.74033	81.7207
AAEL017056	Recognition	ClasRec	PGRP	PGRPS	high	PGRPS4	PGRP-SC1a	x	0.343017	2.35134	2.97184	100	176.632	x	0.605876	4.1532	5.2492	176.632
AAEL019858	Recognition	ClasRec	SCR	SCR_other	high	-	CG42339	x	0	0	0	0	0.156882	x	0	0.156882	0	0
AAEL001914	Recognition	ClasRec	SCR	SCRA	high	-	bark	x	100	75.1308	33.9011	24.3683	43.7045	x	43.7045	32.8355	14.8163	10.65
AAEL022263	Recognition	ClasRec	SCR	SCRA	high	-	Loxl2	x	0	0	0	0	0.26969	x	0.0934372	0.26969	0.0735532	0
AAEL023587	Recognition	ClasRec	SCR	SCRA	high	-	teq	x	0	0	0	0	0.514959	x	0.240436	0.514959	0.0717849	0
AAEL027694	Recognition	ClasRec	SCR	SCRA	high	-	-	x	0	0	0	0	0.815511	x	0.815511	0.27502	0	0
AAEL009192	Recognition	ClasRec	SCR	SCRA	high	SCRASP1	teq	x	0	0	0	0	0.207491	x	0.207491	0	0.0735532	0.124451
AAEL010655	Recognition	ClasRec	SCR	SCRA	high	SCRASP2	Corin	x	0	0	0	0	0.0899474	x	0	0	0.0899474	0
AAEL019436	Recognition	ClasRec	SCR	SCRB	high	-	Snmp2	x	100	0	4.40123	15.2605	1.63102	x	1.63102	0	0.0717849	0.248902
AAEL000256	Recognition	ClasRec	SCR	SCRB	high	SCRB9	emp	x	100	36.0461	9.98257	32.0675	4.73164	x	4.73164	1.70557	0.472339	1.51732
AAEL008370	Recognition	ClasRec	SCR	SCRB	high	SCRB17	pes	x	68.5169	100	52.4059	95.2347	23.1324	x	15.8496	23.1324	12.1228	22.0301
AAEL009423	Recognition	ClasRec	SCR	SCRB	high	SCRBQ2	crq	x	74.0498	100	32.8959	59.6807	29.5403	x	21.8746	29.5403	9.71757	17.6299
AAEL000234	Recognition	ClasRec	SCR	SCRB	high	SCRB7	CG2736	x	46.4598	100	13.2286	30.8143	110.24	x	51.2173	110.24	14.5833	33.9698
AAEL011222	Recognition	ClasRec	SCR	SCRB	high	SCRB5	CG40006	x	42.2705	100	6.80193	20.5247	2.40374	x	1.01607	2.40374	0.163501	0.49336
AAEL009420	Recognition	ClasRec	SCR	SCRB	high	SCRBQ1	crq	x	30.0395	50.5404	100	67.2758	50.9239	x	15.2973	25.7371	50.9239	34.2595
AAEL009432	Recognition	ClasRec	SCR	SCRB	high	SCRBQ3	crq	x	1.73176	2.47195	40.1672	100	255.439	x	4.42358	6.31433	102.603	255.439
AAEL000227	Recognition	ClasRec	SCR	SCRB	high	SCRB8	CG3829	x	9.96445	17.8708	31.0499	100	72.8963	x	7.26371	13.0271	22.6342	72.8963
AAEL027927	Recognition	ClasRec	SCR	SCRB	high	-	pes	x	0	0	0	0	0.882167	x	0.882167	0.134845	0	0
AAEL005374	Recognition	ClasRec	SCR	SCRB	high	SCRB1	Snmp1	x	0	0	0	0	0.236275	x	0	0.236275	0	0
AAEL005979	Recognition	ClasRec	SCR	SCRB	high	SCRB3	dsb	x	0	0	0	0	0.186874	x	0.186874	0	0	0
AAEL002741	Recognition	ClasRec	SCR	SCRB	high	SCRB6	CG10345	x	0	0	0	0	0.207491	x	0.207491	0	0	0
AAEL006355	Recognition	ClasRec	SCR	SCRC	high	SCRC1	Sr-CI	x	0	0	0	0	0.971282	x	0.0934372	0.971282	0	0
AAEL006361	Recognition	ClasRec	SCR	SCRC	high	SCRC2	Sr-CI	x	0	0	0	0	0.0934372	x	0.0934372	0	0	0
AAEL019726	Recognition	OtheRec	CTL	atypicalLECTIN	low	-	Mp	x	100	69.5691	1.75654	17.7261	4.18739	x	4.18739	2.91313	0.0735532	0.742262
AAEL011622	Recognition	OtheRec	CTL	atypicalLECTIN	low	-	-	x	35.7467	100	5.32512	3.71654	12.9806	x	4.64012	12.9806	0.691231	0.482428
AAEL025598	Recognition	OtheRec	CTL	atypicalLECTIN	low	-	-	x	0	0	0	0	0	x	0	0	0	0
AAEL022136	Recognition	OtheRec	CTL	CTL	high	-	rgn	x	100	48.3777	74.5527	10.9661	48.4698	x	48.4698	23.4486	36.1355	5.31524
AAEL005482	Recognition	OtheRec	CTL	CTL	high	CTL18	-	x	100	53.1681	0	0	48.8091	x	48.8091	25.9509	0	0
AAEL018207	Recognition	OtheRec	CTL	CTL	high	CTL8	nw	x	100	76.5897	11.4965	18.5691	3.46877	x	3.46877	2.65672	0.398786	0.64412
AAEL009338	Recognition	OtheRec	CTL	CTL	high	CTL10	CG13587	x	43.7259	100	28.5013	11.2918	37.8417	x	16.5466	37.8417	10.7854	4.27301
AAEL026955	Recognition	OtheRec	CTL	CTL	high	-	-	x	41.8525	100	2.55997	11.7956	8.55052	x	3.5786	8.55052	0.218891	1.00858
AAEL014382	Recognition	OtheRec	CTL	CTL	high	CTLMA14	-	x	17.6283	100	1.42063	26.8579	272.011	x	47.9507	272.011	3.86426	73.0564
AAEL018265	Recognition	OtheRec	CTL	CTL	high	CTL9	CG14866	x	26.7022	8.09319	100	12.6538	3.6046	x	0.962509	0.291727	3.6046	0.456119
AAEL006825	Recognition	OtheRec	CTL	CTL	high	-	CG15765	x	0	0	0	0	0.156882	x	0	0.156882	0	0
AAEL029068	Recognition	OtheRec	CTL	CTL	high	-	-	x	0	0	0	0	0	x	0	0	0	0
AAEL014384	Recognition	OtheRec	CTL	CTL	high	-	-	x	0	0	0	0	0	x	0	0	0	0
AAEL008299	Recognition	OtheRec	CTL	CTL	high	CTL11	-	x	0	0	0	0	0	x	0	0	0	0
AAEL019633	Recognition	OtheRec	CTL	CTL	high	-	-	x	0	0	0	0	0.679555	x	0.186874	0.679555	0	0.347045
AAEL008681	Recognition	OtheRec	CTL	CTLGA	high	CTL12	-	x	100	73.8303	52.1027	54.4021	19.2546	x	19.2546	14.2158	10.0322	10.4749
AAEL011070	Recognition	OtheRec	CTL	CTLGA	high	CTLGA3	Clect27	x	100	33.6419	17.4853	30.5875	3.01813	x	3.01813	1.01536	0.52773	0.923171
AAEL013853	Recognition	OtheRec	CTL	CTLGA	high	CTLGA2	CG4115	x	58.7944	81.1449	100	60.2999	1.80648	x	1.06211	1.46587	1.80648	1.08931
AAEL011078	Recognition	OtheRec	CTL	CTLGA	high	CTLGA1	CG6055	x	0	0	0	0	0.236275	x	0	0.236275	0	0
AAEL029039	Recognition	OtheRec	CTL	CTLMA	high	-	lectin-33A	x	100	51.3748	12.6723	0	1.29022	x	1.29022	0.662847	0.163501	0
AAEL002524	Recognition	OtheRec	CTL	CTLMA	high	CTL24	lectin-37Da	x	100	62.945	19.8541	8.34428	1.17616	x	1.17616	0.740337	0.233517	0.0981425
AAEL011453	Recognition	OtheRec	CTL	CTLMA	high	CTL14	lectin-37Da	x	92.9851	100	61.9	44.8213	2.08807	x	1.94159	2.08807	1.29251	0.9359
AAEL011408	Recognition	OtheRec	CTL	CTLMA	high	CTL21	lectin-37Da	x	84.1561	100	15.7984	5.59332	2.42044	x	2.03695	2.42044	0.382392	0.135383
AAEL029058	Recognition	OtheRec	CTL	CTLMA	high	-	lectin-33A	x	81.1169	100	4.73518	0	1.51599	x	1.22973	1.51599	0.0717849	0
AAEL000543	Recognition	OtheRec	CTL	CTLMA	high	CTLMA11	lectin-37Da	x	30.3323	100	12.2183	86.5321	3.74614	x	1.13629	3.74614	0.457713	3.24161
AAEL005641	Recognition	OtheRec	CTL	CTLMA	high	CTLGA5	lectin-37Da	x	10.8014	52.8966	17.7086	100	72.8449	x	7.86828	38.5324	12.8998	72.8449
AAEL011407	Recognition	OtheRec	CTL	CTLMA	high	CTL20	lectin-37Da	x	8.13436	0	3.7769	100	4.28214	x	0.348325	0	0.161732	4.28214
AAEL022823	Recognition	OtheRec	CTL	CTLMA	high	-	lectin-37Da	x	0	0	0	0	0	x	0	0	0	0
AAEL029020	Recognition	OtheRec	CTL	CTLMA	high	-	lectin-33A	x	0	0	0	0	0.511295	x	0.120218	0.511295	0	0
AAEL029053	Recognition	OtheRec	CTL	CTLMA	high	-	lectin-33A	x	0	0	0	0	0	x	0	0	0	0
AAEL023353	Recognition	OtheRec	CTL	CTLMA	high	-	lectin-37Da	x	0	0	0	0	0.629432	x	0.414981	0.629432	0	0.406149
AAEL025802	Recognition	OtheRec	CTL	CTLMA	high	-	-	x	0	0	0	0	0	x	0	0	0	0
AAEL027215	Recognition	OtheRec	CTL	CTLMA	high	-	lectin-37Da	x	0	0	0	0	0.236275	x	0	0.236275	0	0
AAEL027443	Recognition	OtheRec	CTL	CTLMA	high	-	lectin-37Da	x	0	0	0	0	0	x	0	0	0	0
AAEL012353	Recognition	OtheRec	CTL	CTLMA	high	CTL15	lectin-37Da	x	0	0	0	0	0.764277	x	0.447927	0.764277	0	0.565194
AAEL000533	Recognition	OtheRec	CTL	CTLMA	high	CTL16	lectin-37Da	x	0	0	0	0	0.118137	x	0	0.118137	0	0
AAEL011404	Recognition	OtheRec	CTL	CTLMA	high	CTL19	lectin-37Da	x	0	0	0	0	0.207491	x	0.207491	0.134845	0	0
AAEL000556	Recognition	OtheRec	CTL	CTLMA	high	CTL25	lectin-37Da	x	0	0	0	0	0.354412	x	0	0.354412	0	0
AAEL009209	Recognition	OtheRec	CTL	CTLMA	high	CTLGA6	lectin-37Da	x	0	0	0	0	0	x	0	0	0	0
AAEL011079	Recognition	OtheRec	CTL	CTLMA	high	CTLMA10	lectin-37Da	x	0	0	0	0	0	x	0	0	0	0
AAEL011455	Recognition	OtheRec	CTL	CTLMA	high	CTLMA12	lectin-37Da	x	0	0	0	0	0.307092	x	0.307092	0.26969	0.0735532	0
AAEL011621	Recognition	OtheRec	CTL	CTLMA	high	CTLMA13	-	x	0	0	0	0	0.156882	x	0	0.156882	0	0
AAEL000283	Recognition	OtheRec	CTL	CTLMA	high	CTLMA16	lectin-37Da	x	0	0	0	0	0	x	0	0	0	0
AAEL011612	Recognition	OtheRec	CTL	CTLMA	high	CTLMA6	tfc	x	0	0	0	0	0.118137	x	0	0.118137	0.0735532	0
AAEL000563	Recognition	OtheRec	CTL	CTLMA	high	mosGCTL-1	lectin-37Da	x	0	0	0	0	0	x	0	0	0	0
AAEL014357	Recognition	OtheRec	CTL	CTLSE	high	-	CG9095	x	0	0	0	0	0.27502	x	0.207491	0.27502	0.0735532	0
AAEL021200	Recognition	OtheRec	CTL	CTLSE	high	-	fw	x	0	0	0	0	0.373749	x	0.373749	0.156882	0	0
AAEL000508	Recognition	OtheRec	FREP	FREP	high	-	CG9593	x	100	49.6208	18.5362	12.0154	1.85256	x	1.85256	0.919257	0.343395	0.222594
AAEL011009	Recognition	OtheRec	FREP	FREP	high	-	CG30280	x	68.6294	100	71.1579	14.4651	23.5667	x	16.1737	23.5667	16.7696	3.40894
AAEL006699	Recognition	OtheRec	FREP	FREP	high	-	CG1791	x	79.7512	100	5.24421	7.22795	2713.84	x	2164.32	2713.84	142.319	196.155
AAEL011007	Recognition	OtheRec	FREP	FREP	high	-	CG30280	x	79.3989	100	16.2387	41.0216	1172.85	x	931.229	1172.85	190.455	481.121
AAEL006702	Recognition	OtheRec	FREP	FREP	high	-	CG1791	x	74.9949	100	6.44863	23.0799	1652.65	x	1239.41	1652.65	106.574	381.43
AAEL028145	Recognition	OtheRec	FREP	FREP	high	-	CG1791	x	62.4609	100	1.9567	7.50846	2145.04	x	1339.81	2145.04	41.972	161.06
AAEL006691	Recognition	OtheRec	FREP	FREP	high	-	CG1791	x	60.5966	100	6.21132	10.5298	1846.56	x	1118.95	1846.56	114.696	194.439
AAEL006704	Recognition	OtheRec	FREP	FREP	high	-	-	x	59.3954	100	0.878545	6.93618	30544.3	x	18141.9	30544.3	268.345	2118.61
AAEL007942	Recognition	OtheRec	FREP	FREP	high	-	CG30280	x	44.7543	100	0.0805054	0.0405237	1551.55	x	694.383	1551.55	1.24908	0.628743
AAEL011633	Recognition	OtheRec	FREP	FREP	high	-	CG30280	x	41.5516	100	9.42139	32.4594	2.69013	x	1.1178	2.69013	0.253448	0.873201
AAEL019868	Recognition	OtheRec	FREP	FREP	high	-	CG30280	x	19.1284	100	3.69087	8.81726	51.9347	x	9.93428	51.9347	1.91684	4.57922
AAEL021180	Recognition	OtheRec	FREP	FREP	high	-	CG30280	x	7.30902	100	12.6211	14.9977	3.28958	x	0.240436	3.28958	0.41518	0.49336
AAEL003294	Recognition	OtheRec	FREP	FREP	high	-	CG30280	x	0	0	0	0	0.134845	x	0.0934372	0.134845	0.0717849	0
AAEL009384	Recognition	OtheRec	FREP	FREP	high	-	CG30280	x	0	0	0	0	0.530601	x	0.213655	0	0.30707	0.530601
AAEL009723	Recognition	OtheRec	FREP	FREP	high	-	CG41520	x	0	0	0	0	0.291727	x	0.114053	0.291727	0.161732	0
AAEL014773	Recognition	OtheRec	FREP	FREP	high	-	sca	x	0	0	0	0	0	x	0	0	0	0
AAEL025744	Recognition	OtheRec	FREP	FREP	high	-	CG30280	x	0	0	0	0	0.37112	x	0.120218	0.37112	0	0
AAEL014432	Recognition	OtheRec	FREP	FREP	high	-	CG30280	x	0	0	0	0	0	x	0	0	0	0
AAEL025451	Recognition	OtheRec	FREP	FREP	high	-	-	x	0	0	0	0	0.124451	x	0	0	0	0.124451
AAEL023956	Recognition	OtheRec	FREP	FREP	high	-	CG9593	x	0	0	0	0	0.252983	x	0.139112	0.252983	0	0
AAEL011634	Recognition	OtheRec	FREP	FREP	high	-	CG30280	x	0	0	0	0	0	x	0	0	0	0
AAEL001713	Recognition	OtheRec	FREP	FREP	high	-	-	x	0	0	0	0	0	x	0	0	0	0
AAEL000726	Recognition	OtheRec	FREP	FREP	high	-	-	x	0	0	0	0	0	x	0	0	0	0
AAEL000749	Recognition	OtheRec	FREP	FREP	high	-	-	x	0	0	0	0	0	x	0	0	0	0
AAEL008104	Recognition	OtheRec	FREP	FREP	high	-	CG30280	x	0	0	0	0	0	x	0	0	0	0
AAEL013417	Recognition	OtheRec	FREP	FREP	high	-	CG30280	x	0	0	0	0	0.751082	x	0.0935636	0.751082	0.285291	0.223045
AAEL013506	Recognition	OtheRec	FREP	FREP	high	-	CG30280	x	0	0	0	0	0.300928	x	0.300928	0.118137	0.0735532	0
AAEL002713	Recognition	OtheRec	FREP	FREP	high	-	CG30280	x	0	0	0	0	0	x	0	0	0	0
AAEL010117	Recognition	OtheRec	FREP	FREP	high	-	CG30280	x	0	0	0	0	0	x	0	0	0	0
AAEL000668	Recognition	OtheRec	LRIM	atypicalLRR	low	-	CG8852	x	100	75.1772	15.8175	16.33	1.59115	x	1.59115	1.19618	0.25168	0.259834
AAEL024532	Recognition	OtheRec	LRIM	atypicalLRR	low	-	-	x	100	20.8604	13.7391	27.6039	5.28265	x	5.28265	1.10198	0.725787	1.45822
AAEL027202	Recognition	OtheRec	LRIM	atypicalLRR	low	-	-	x	100	37.3764	12.5774	88.6125	1.15555	x	1.15555	0.431902	0.145338	1.02396
AAEL027960	Recognition	OtheRec	LRIM	atypicalLRR	low	-	-	x	100	21.7795	6.61704	0	1.08485	x	1.08485	0.236275	0.0717849	0
AAEL014027	Recognition	OtheRec	LRIM	atypicalLRR	low	-	-	x	92.4379	100	82.7571	76.0006	4.48305	x	4.14404	4.48305	3.71004	3.40714
AAEL012634	Recognition	OtheRec	LRIM	atypicalLRR	low	-	-	x	72.0998	100	8.95628	12.0958	1.62275	x	1.17	1.62275	0.145338	0.196285
AAEL024346	Recognition	OtheRec	LRIM	atypicalLRR	high	-	LRR	x	71.0754	100	25.6532	34.2774	38.7378	x	27.5331	38.7378	9.93749	13.2783
AAEL003331	Recognition	OtheRec	LRIM	atypicalLRR	high	-	conv	x	70.1492	100	22.5362	65.8719	2.08807	x	1.46476	2.08807	0.470571	1.37545
AAEL008398	Recognition	OtheRec	LRIM	atypicalLRR	high	-	Lrrk	x	66.2114	100	40.7446	79.8177	9.45688	x	6.26153	9.45688	3.85317	7.54827
AAEL027836	Recognition	OtheRec	LRIM	atypicalLRR	low	-	CG9003	x	53.9947	100	24.2208	91.9214	35.6459	x	19.2469	35.6459	8.63372	32.7662
AAEL003115	Recognition	OtheRec	LRIM	atypicalLRR	high	-	Fili	x	52.0652	100	6.26185	18.7396	4.01926	x	2.09263	4.01926	0.25168	0.753194
AAEL021071	Recognition	OtheRec	LRIM	atypicalLRR	low	-	CG8852	x	51.455	100	26.7341	17.6531	22.9023	x	11.7844	22.9023	6.12273	4.04298
AAEL007778	Recognition	OtheRec	LRIM	atypicalLRR	low	-	CG4950	x	43.6253	100	4.74434	73.0977	52.1434	x	22.7477	52.1434	2.47386	38.1156
AAEL001766	Recognition	OtheRec	LRIM	atypicalLRR	high	-	-	x	29.7931	100	8.65568	3.70278	6.30676	x	1.87898	6.30676	0.545892	0.233526
AAEL003111	Recognition	OtheRec	LRIM	atypicalLRR	high	-	Fili	x	26.1979	100	10.4734	0	2.08997	x	0.547528	2.08997	0.218891	0
AAEL027361	Recognition	OtheRec	LRIM	atypicalLRR	low	-	CG3040	x	67.4078	100	16.5071	43.7582	14.5113	x	9.78174	14.5113	2.39539	6.34988
AAEL005762	Recognition	OtheRec	LRIM	atypicalLRR	low	-	CG18095	x	33.7412	25.9788	100	32.1587	24.7984	x	8.36726	6.44232	24.7984	7.97482
AAEL005221	Recognition	OtheRec	LRIM	atypicalLRR	low	-	CG32687	x	34.5904	32.8036	19.3186	100	483.679	x	167.306	158.664	93.4399	483.679
AAEL023577	Recognition	OtheRec	LRIM	atypicalLRR	low	-	-	x	68.0771	85.6679	0	100	1.0021	x	0.682198	0.858474	0	1.0021
AAEL002819	Recognition	OtheRec	LRIM	atypicalLRR	low	-	CG11807	x	84.2279	86.4129	28.758	100	5.41433	x	4.56037	4.67868	1.55705	5.41433
AAEL025368	Recognition	OtheRec	LRIM	atypicalLRR	high	-	LRR	x	0	0	0	0	0.230262	x	0	0	0.230262	0
AAEL015019	Recognition	OtheRec	LRIM	atypicalLRR	high	-	-	x	0	0	0	0	0.118137	x	0.114053	0.118137	0	0
AAEL008365	Recognition	OtheRec	LRIM	atypicalLRR	low	-	-	x	0	0	0	0	0.489257	x	0.327709	0.489257	0	0
AAEL012722	Recognition	OtheRec	LRIM	atypicalLRR	low	-	-	x	0	0	0	0	0.654953	x	0.17821	0.156882	0.654953	0
AAEL012724	Recognition	OtheRec	LRIM	atypicalLRR	low	-	-	x	0	0	0	0	0.342851	x	0.342851	0.252983	0	0.248902
AAEL024539	Recognition	OtheRec	LRIM	atypicalLRR	low	-	CG9003	x	0	0	0	0	0	x	0	0	0	0
AAEL024654	Recognition	OtheRec	LRIM	atypicalLRR	low	-	-	x	0	0	0	0	0	x	0	0	0	0
AAEL027849	Recognition	OtheRec	LRIM	atypicalLRR	low	-	-	x	0	0	0	0	0.503988	x	0.503988	0.118137	0.0735532	0.347045
AAEL003408	Recognition	OtheRec	LRIM	atypicalLRR	low	-	atk	x	0	0	0	0	0.114053	x	0.114053	0	0	0
AAEL007127	Recognition	OtheRec	LRIM	atypicalLRR	low	-	CG13708	x	0	0	0	0	0.856743	x	0.856743	0.780985	0.22066	0
AAEL007785	Recognition	OtheRec	LRIM	atypicalLRR	low	-	CG4950	x	0	0	0	0	0.841767	x	0.682198	0.841767	0	0.0981425
AAEL010232	Recognition	OtheRec	LRIM	atypicalLRR	low	-	-	x	0	0	0	0	0.354412	x	0	0.354412	0.179895	0
AAEL010808	Recognition	OtheRec	LRIM	atypicalLRR	low	-	Lrr47	x	0	0	0	0	0.333873	x	0.333873	0	0.147106	0.233526
AAEL012412	Recognition	OtheRec	LRIM	atypicalLRR	low	-	CG14762	x	0	0	0	0	0.676033	x	0.676033	0.118137	0.269842	0.0981425
AAEL012726	Recognition	OtheRec	LRIM	atypicalLRR	low	-	-	x	0	0	0	0	0.134845	x	0	0.134845	0	0.124451
AAEL000387	Recognition	OtheRec	LRIM	atypicalLRR	low	-	CG8852	x	0	0	0	0	0.228107	x	0.228107	0.134845	0.0717849	0
AAEL000650	Recognition	OtheRec	LRIM	atypicalLRR	low	-	CG8852	x	0	0	0	0	0.348325	x	0.348325	0.156882	0	0.124451
AAEL021586	Recognition	OtheRec	LRIM	atypicalLRR	low	-	-	x	0	0	0	0	0.222594	x	0	0.134845	0.0899474	0.222594
AAEL023798	Recognition	OtheRec	LRIM	atypicalLRR	low	-	-	x	0	0	0	0	0	x	0	0	0	0
AAEL026478	Recognition	OtheRec	LRIM	atypicalLRR	low	-	-	x	0	0	0	0	0.774278	x	0.774278	0.627529	0.556982	0.482428
AAEL012255	Recognition	OtheRec	LRIM	LRIM_other	high	LRIM13	CG8852	x	0	0	0	0	0.937867	x	0.120218	0.937867	0	0
AAEL007224	Recognition	OtheRec	LRIM	LRIM_other	high	LRIM22	CG8852	x	0	0	0	0	0	x	0	0	0	0
AAEL009792	Recognition	OtheRec	LRIM	LRIM_other	high	LRIM25	CG8852	x	0	0	0	0	0.213655	x	0.213655	0	0.145338	0
AAEL012911	Recognition	OtheRec	LRIM	LRIMCL	high	LRIM18	igl	x	97.6584	100	25.7203	35.3725	14.7616	x	14.4159	14.7616	3.79672	5.22154
AAEL009894	Recognition	OtheRec	LRIM	LRIMCL	high	LRIM21	-	x	51.5961	100	23.8092	26.523	20.6053	x	10.6315	20.6053	4.90596	5.46515
AAEL010125	Recognition	OtheRec	LRIM	LRIMCL	high	LRIM17	alrm	x	0	100	0	0	1.90382	x	0	1.90382	0	0
AAEL000762	Recognition	OtheRec	LRIM	LRIMCL	high	LRIM19	CG8852	x	0	0	0	0	0.118137	x	0	0.118137	0	0
AAEL006920	Recognition	OtheRec	LRIM	LRIMCL	high	LRIM20	CG8852	x	0	0	0	0	0.207491	x	0.207491	0.156882	0	0
AAEL010128	Recognition	OtheRec	LRIM	LRIML	high	LRIM4	alrm	x	100	24.3013	7.87299	7.33373	1.84603	x	1.84603	0.44861	0.145338	0.135383
AAEL012086	Recognition	OtheRec	LRIM	LRIML	high	LRIM1	-	x	68.0573	100	3.26586	32.7601	2.25218	x	1.53278	2.25218	0.0735532	0.737818
AAEL024406	Recognition	OtheRec	LRIM	LRIML	high	-	alrm	x	0	0	0	0	0.902018	x	0.902018	0.786314	0.14357	0.135383
AAEL010132	Recognition	OtheRec	LRIM	LRIML	high	LRIM3	alrm	x	0	0	0	0	0	x	0	0	0	0
AAEL004466	Recognition	OtheRec	LRIM	LRIMS	high	LRIM23	CG8852	x	100	98.8739	34.1966	32.267	2.48912	x	2.48912	2.46109	0.851195	0.803164
AAEL010656	Recognition	OtheRec	LRIM	LRIMS	high	LRIM12	CG8852	x	87.194	100	0	30.6406	1.62465	x	1.4166	1.62465	0	0.497804
AAEL001420	Recognition	OtheRec	LRIM	LRIMS	high	LRIM8	CG8852	x	73.2595	100	2.28937	11.4824	3.21281	x	2.35369	3.21281	0.0735532	0.368909
AAEL001402	Recognition	OtheRec	LRIM	LRIMS	high	LRIM10B	CG8852	x	52.2723	100	2.75224	18.2448	5.87638	x	3.07172	5.87638	0.161732	1.07213
AAEL001414	Recognition	OtheRec	LRIM	LRIMS	high	LRIM9	CG8852	x	29.7532	100	0	8.08142	10.6698	x	3.1746	10.6698	0	0.862269
AAEL001401	Recognition	OtheRec	LRIM	LRIMS	high	LRIM10A	CG8852	x	27.894	100	1.12065	4.13225	8.02633	x	2.23887	8.02633	0.0899474	0.331668
AAEL027236	Recognition	OtheRec	LRIM	LRIMS	high	-	CG8852	x	0	0	0	0	0.134845	x	0	0.134845	0	0
AAEL012763	Recognition	OtheRec	LRIM	LRIMS	high	LRIM24	CG8852	x	0	0	0	0	0.566747	x	0.120218	0.566747	0	0.270766
AAEL012767	Recognition	OtheRec	LRIM	LRIMS	high	LRIM5	CG8852	x	0	0	0	0	0.313765	x	0	0.313765	0.0899474	0
AAEL012538	Recognition	OtheRec	LRIM	LRIMS	high	LRIM6	CG8852	x	0	0	0	0	0.327709	x	0.327709	0.134845	0	0
AAEL001417	Recognition	OtheRec	LRIM	LRIMS	high	LRIM7	CG8852	x	0	0	0	0	0.0934372	x	0.0934372	0	0	0
AAEL008658	Recognition	OtheRec	LRIM	LRIMTM	high	LRIM16	CG4950	x	36.5229	100	4.11161	6.43827	184.628	x	67.4316	184.628	7.5912	11.8869
AAEL007103	Recognition	OtheRec	LRIM	LRIMTM	high	LRIM15	CG4950	x	0	0	0	0	0.797692	x	0.240436	0.797692	0	0.0981425
AAEL026650	Recognition	OtheRec	LRIM	LRR-Toll	high	-	-	x	0	0	0	0	0.120218	x	0.120218	0	0	0
AAEL012064	Recognition	OtheRec	ML	ML	high	-	Npc2b	x	100	89.9483	32.0995	33.3199	5.96886	x	5.96886	5.36889	1.91598	1.98882
AAEL020314	Recognition	OtheRec	ML	ML	high	-	Npc2a	x	67.5071	100	8.38136	11.252	4.97023	x	3.35526	4.97023	0.416573	0.559253
AAEL009760	Recognition	OtheRec	ML	ML	high	-	Npc2c	x	48.8059	100	15.2951	6.31913	5451.47	x	2660.64	5451.47	833.806	344.485
AAEL006854	Recognition	OtheRec	ML	ML	high	-	Npc2a	x	42.284	100	5.91189	40.6081	4.92316	x	2.08171	4.92316	0.291051	1.9992
AAEL004120	Recognition	OtheRec	ML	ML	high	-	Npc2g	x	34.3687	100	3.45076	5.19387	2.6066	x	0.895853	2.6066	0.0899474	0.135383
AAEL001650	Recognition	OtheRec	ML	ML	high	-	Npc2c	x	20.1308	100	6.93026	0	1.06133	x	0.213655	1.06133	0.0735532	0
AAEL026174	Recognition	OtheRec	ML	ML	high	-	Npc2c	x	1.20085	0.574875	38.5708	100	27.2898	x	0.327709	0.156882	10.5259	27.2898
AAEL015139	Recognition	OtheRec	ML	ML	high	-	Npc2c	x	0	9.12325	19.9056	100	1.47804	x	0	0.134845	0.294213	1.47804
AAEL015136	Recognition	OtheRec	ML	ML	high	-	Npc2c	x	24.3043	17.6479	17.2366	100	1900.97	x	462.017	335.481	327.662	1900.97
AAEL007592	Recognition	OtheRec	ML	ML	high	-	Npc2c	x	6.14865	4.71563	14.5239	100	274.368	x	16.87	12.9382	39.8489	274.368
AAEL009556	Recognition	OtheRec	ML	ML	high	-	Npc2c	x	0.484331	9.21222	5.4097	100	57.876	x	0.280312	5.33167	3.13092	57.876
AAEL025109	Recognition	OtheRec	ML	ML	high	-	Npc2f	x	60.1436	60.6053	5.20037	100	107.836	x	64.8568	65.3546	5.60789	107.836
AAEL007591	Recognition	OtheRec	ML	ML	high	-	Npc2c	x	0.122703	0.575059	2.87916	100	1292.83	x	1.58634	7.43454	37.2227	1292.83
AAEL015140	Recognition	OtheRec	ML	ML	high	-	Npc2c	x	27.6672	23.6291	0	100	1.4999	x	0.414981	0.354412	0	1.4999
AAEL015137	Recognition	OtheRec	ML	ML	high	-	Npc2c	x	0	0	0	100	12.1194	x	0	0	0	12.1194
AAEL009956	Recognition	OtheRec	ML	ML	high	-	Npc2c	x	0	0	0	0	0.196285	x	0.0934372	0	0	0.196285
AAEL001634	Recognition	OtheRec	ML	ML	high	-	Npc2c	x	0	0	0	0	0	x	0	0	0	0
AAEL001654	Recognition	OtheRec	ML	ML	high	-	Npc2c	x	0	0	0	0	0.135383	x	0	0	0	0.135383
AAEL009553	Recognition	OtheRec	ML	ML	high	-	Npc2c	x	0	0	0	0	0	x	0	0	0	0
AAEL009555	Recognition	OtheRec	ML	ML	high	-	Npc2c	x	0	0	0	0	0	x	0	0	0	0
AAEL027949	Recognition	OtheRec	NIMROD	DRAPER	high	-	drpr	x	81.3121	100	35.8647	47.5749	33.0194	x	26.8488	33.0194	11.8423	15.709
AAEL019649	Recognition	OtheRec	NIMROD	EATER	high	-	eater	x	0	0	0	0	0.145338	x	0.120218	0.134845	0.145338	0
AAEL026517	Recognition	OtheRec	NIMROD	NIMA	high	-	NimA	x	0	0	0	0	0	x	0	0	0	0
AAEL019650	Recognition	OtheRec	NIMROD	NIMC	high	-	NimB2	x	82.2016	100	14.3733	14.3739	1.62465	x	1.33549	1.62465	0.233517	0.233526
AAEL000636	Recognition	OtheRec	NIMROD	NIMC	high	-	NimC1	x	0	0	0	0	0.236275	x	0.120218	0.236275	0	0
AAEL021410	Recognition	OtheRec	NIMROD	NIMC	high	-	NimC2	x	0	0	0	0	0	x	0	0	0	0
AAEL008607	Recognition	OtheRec	TEP	TEP	high	-	Tep1	x	100	74.4291	57.4167	18.0244	7.79832	x	7.79832	5.80422	4.47754	1.4056
AAEL012267	Recognition	OtheRec	TEP	TEP	high	-	Mcr	x	71.0676	100	18.5769	33.6164	8.61059	x	6.11934	8.61059	1.59958	2.89457
AAEL025055	Recognition	OtheRec	TEP	TEP	high	-	-	x	69.6144	100	28.3706	28.876	2.86905	x	1.99727	2.86905	0.813966	0.828469
AAEL017023	Recognition	OtheRec	TEP	TEP	high	-	-	x	20.9594	100	0	12.1122	2.23548	x	0.468543	2.23548	0	0.270766
AAEL001794	Recognition	OtheRec	TEP	TEP	high	-	Tep2	x	15.0326	100	3.25295	4.2868	7.73697	x	1.16307	7.73697	0.25168	0.331668
AAEL001163	Recognition	OtheRec	TEP	TEP	high	-	Tep2	x	0	0	0	0	0.188797	x	0.188797	0	0	0.173627
AAEL025334	Recognition	OtheRec	TEP	TEP	low	-	-	x	0	0	0	0	0	x	0	0	0	0
AAEL019958	Recognition	OtheRec	TEP	TEP	high	-	-	x	0	0	0	0	0.234271	x	0.234271	0.156882	0	0
AAEL019959	Recognition	OtheRec	TEP	TEP	high	-	-	x	0	0	0	0	0	x	0	0	0	0
AAEL000087	Recognition	OtheRec	TEP	TEP	high	-	-	x	0	0	0	0	0.134845	x	0	0.134845	0	0.124451
AAEL013072	RNAinterference	piRNA	piRNA	piRNA	high	-	papi	x	100	55.1686	49.9211	17.9558	4.38736	x	4.38736	2.42044	2.19022	0.787787
AAEL009326	RNAinterference	piRNA	piRNA	piRNA	high	-	Fmr1	x	100	88.1905	60.6807	33.6301	29.0179	x	29.0179	25.591	17.6083	9.75873
AAEL000289	RNAinterference	piRNA	piRNA	piRNA	high	-	Gasz	x	94.2165	100	53.7395	36.85	7.81327	x	7.36139	7.81327	4.19881	2.87919
AAEL010029	RNAinterference	piRNA	piRNA	piRNA	high	-	Hen1	x	88.4309	100	42.3865	37.468	13.5795	x	12.0084	13.5795	5.75587	5.08795
AAEL001939	RNAinterference	piRNA	piRNA	piRNA	high	-	SoYb	x	78.022	100	49.7028	37.7892	6.01313	x	4.69156	6.01313	2.9887	2.27231
AAEL012437	RNAinterference	piRNA	piRNA	piRNA	high	-	-	x	93.9552	36.1902	94.0883	100	8.0253	x	7.54018	2.90437	7.55087	8.0253
AAEL000293	RNAinterference	piRNA	SRRP	TSN	high	-	Tudor-SN	x	66.5055	100	93.807	58.0284	65.3627	x	43.4698	65.3627	61.3148	37.929
AAEL020359	RNAinterference	RNAi	0	0	high	-	vret	x	100	76.8927	66.2577	30.0785	3.24414	x	3.24414	2.49451	2.14949	0.975788
AAEL027589	RNAinterference	RNAi	RNAi	RNAi	high	-	qin	x	82.6365	100	60.2053	23.1641	3.25155	x	2.68697	3.25155	1.95761	0.753194
AAEL007080	RNAinterference	RNAi	RNAi	RNAi	high	-	mino	x	12.0066	25.8396	8.012	100	66.9099	x	8.03362	17.2892	5.36082	66.9099
AAEL021734	RNAinterference	RNAi	RNAi	RNAi	high	-	mino	x	91.3903	27.1491	4.77148	100	1.24076	x	1.13394	0.336855	0.0592027	1.24076
AAEL021382	RNAinterference	RNAi	RNAi	RNAi	high	-	mino	x	0	0	0	0	0	x	0	0	0	0
AAEL013721	RNAinterference	RNAi	RNAi	RNAi	high	loqs2	-	x	0	0	0	0	0	x	0	0	0	0
AAEL019460	RNAinterference	RNAi	SRRP	Armitage	high	-	armi	x	100	82.4225	89.1386	36.2632	42.8614	x	42.8614	35.3274	38.206	15.5429
AAEL001612	RNAinterference	RNAi	SRRP	DSRNA	high	-	Dcr-1	x	100	62.5567	32.7737	40.9552	1.59943	x	1.59943	1.00055	0.524193	0.655052
AAEL026022	RNAinterference	RNAi	SRRP	DSRNA	high	-	pasha	x	100	95.0478	37.6997	31.6003	12.7968	x	12.7968	12.1631	4.82436	4.04383
AAEL008687	RNAinterference	RNAi	SRRP	DSRNA	high	loqs	loqs	x	100	82.5041	49.8881	30.4632	13.6443	x	13.6443	11.2571	6.80689	4.1565
AAEL011753	RNAinterference	RNAi	SRRP	DSRNA	high	-	r2d2	x	82.464	100	52.1354	67.7011	7.10495	x	5.85903	7.10495	3.7042	4.81013
AAEL006794	RNAinterference	RNAi	SRRP	DSRNA	high	-	Dcr-2	x	52.1626	100	20.042	26.1787	246.576	x	128.62	246.576	49.4187	64.5503
AAEL021519	RNAinterference	RNAi	SRRP	DSRNA	high	-	pasha	x	28.0441	100	15.071	12.2361	7.21869	x	2.02442	7.21869	1.08793	0.883283
AAEL008592	RNAinterference	RNAi	SRRP	DSRNA	high	-	drosha	x	0	0	0	0	0.775635	x	0.775635	0.55004	0.486965	0
AAEL012410	RNAinterference	RNAi	SRRP	PAZPIWI	high	AGO1b	AGO1	x	100	74.8282	59.4456	25.2715	81.4668	x	81.4668	60.9602	48.4284	20.5879
AAEL013227	RNAinterference	RNAi	SRRP	PAZPIWI	high	PIWI6	aub	x	80.2483	100	42.9267	51.3843	13.7037	x	10.997	13.7037	5.88256	7.04157
AAEL017251	RNAinterference	RNAi	SRRP	PAZPIWI	high	AGO2	AGO2	x	69.7143	100	30.4142	26.1095	30.0524	x	20.9508	30.0524	9.1402	7.84653
AAEL013233	RNAinterference	RNAi	SRRP	PAZPIWI	high	PIWI5	aub	x	65.1198	100	46.8893	34.4229	34.2726	x	22.3183	34.2726	16.0702	11.7976
AAEL007698	RNAinterference	RNAi	SRRP	PAZPIWI	high	PIWI4	aub	x	62.3741	100	58.3862	21.0121	16.142	x	10.0684	16.142	9.4247	3.39177
AAEL007823	RNAinterference	RNAi	SRRP	PAZPIWI	high	-	AGO3	x	29.4541	100	40.7548	19.4932	5.26213	x	1.54991	5.26213	2.14457	1.02576
AAEL021425	RNAinterference	RNAi	SRRP	PAZPIWI	high	-	aub	x	0	0	0	0	0.291727	x	0	0.291727	0	0
AAEL008098	RNAinterference	RNAi	SRRP	PAZPIWI	high	PIWI2	aub	x	0	0	0	0	0.120218	x	0.120218	0	0	0
AAEL013692	RNAinterference	RNAi	SRRP	PAZPIWI	high	PIWI3	aub	x	0	0	0	0	0.118137	x	0	0.118137	0.0735532	0
AAEL006287	RNAinterference	RNAi	SRRP	PAZPIWI	high	PIWI7	aub	x	0	0	0	0	0.649252	x	0.649252	0.291727	0.163501	0.519669
AAEL009287	RNAinterference	RNAi	SRRP	Ran	high	-	Ran	x	77.7424	100	48.2041	26.7013	206.546	x	160.574	206.546	99.5636	55.1504
AAEL009392	RNAinterference	RNAi	SRRP	RanBP21	high	-	Ranbp21	x	82.4461	100	44.4609	27.0329	20.2091	x	16.6616	20.2091	8.98515	5.4631
AAEL001657	RNAinterference	RNAi	SRRP	Rm62	high	-	CG10333	x	100	63.0959	36.0628	18.9831	13.4542	x	13.4542	8.48902	4.85195	2.55401
AAEL004472	RNAinterference	RNAi	SRRP	Rm62	high	-	bel	x	100	82.9607	54.8435	27.7209	257.924	x	257.924	213.975	141.455	71.4988
AAEL013985	RNAinterference	RNAi	SRRP	Rm62	high	-	CG6227	x	100	53.8399	43.5124	20.2447	17.9205	x	17.9205	9.64836	7.79763	3.62794
AAEL004978	RNAinterference	RNAi	SRRP	Rm62	high	-	vas	x	84.1962	100	27.7536	23.1221	12.4802	x	10.5079	12.4802	3.46371	2.88568
AAEL008738	RNAinterference	RNAi	SRRP	Rm62	high	-	mahe	x	95.865	100	61.1113	32.8156	283.928	x	272.187	283.928	173.512	93.1727
AAEL002351	RNAinterference	RNAi	SRRP	Rm62	high	-	CG10077	x	87.1337	100	51.8679	31.3065	7.67653	x	6.68884	7.67653	3.98165	2.40325
AAEL002083	RNAinterference	RNAi	SRRP	Rm62	high	-	CG10077	x	85.0587	100	65.4159	48.9427	400.438	x	340.608	400.438	261.951	195.985
AAEL001317	RNAinterference	RNAi	SRRP	Rm62	high	-	CG6418	x	84.2892	100	48.9543	30.6285	18.0238	x	15.1921	18.0238	8.82342	5.52041
AAEL001769	RNAinterference	RNAi	SRRP	Rm62	high	-	mahe	x	63.5269	100	49.2207	31.6039	56.0138	x	35.5838	56.0138	27.5703	17.7026
AAEL010402	RNAinterference	RNAi	SRRP	Rm62	high	-	CG7878	x	53.6329	100	43.6055	50.3965	14.4364	x	7.74266	14.4364	6.29507	7.27546
AAEL012962	RNAinterference	RNAi	SRRP	Rm62	high	-	CG5589	x	96.4415	98.9229	100	30.9001	6.33015	x	6.10489	6.26196	6.33015	1.95602
AAEL010787	RNAinterference	RNAi	SRRP	Rm62	high	-	Rm62	x	64.6271	63.779	100	21.922	1152.1	x	744.568	734.797	1152.1	252.563
AAEL023716	RNAinterference	RNAi	SRRP	Spindle_E	high	-	spn-E	x	100	86.2978	55.3037	46.2593	15.4354	x	15.4354	13.3204	8.53636	7.14032
AAEL008073	RNAinterference	RNAi	SRRP	VIG	high	-	FDY	x	100	80.7369	80.3682	20.5938	166.117	x	166.117	134.118	133.505	34.2097
AAEL013434	Signal Transduction	Cytokin	SPZ	SPZ	high	-	spz	x	100	75.5174	13.7324	26.9387	1.19062	x	1.19062	0.899122	0.163501	0.320736
AAEL013433	Signal Transduction	Cytokin	SPZ	SPZ	high	SPZ1C	spz	x	0	0	0	0	0.0934372	x	0.0934372	0	0	0
AAEL001435	Signal Transduction	Cytokin	SPZ	SPZ	high	SPZ2	NT1	x	0	0	0	0	0	x	0	0	0	0
AAEL008596	Signal Transduction	Cytokin	SPZ	SPZ	high	SPZ3A	spz3	x	0	0	0	0	0.723629	x	0.467186	0.723629	0.0735532	0
AAEL007897	Signal Transduction	Cytokin	SPZ	SPZ	high	SPZ4	spz4	x	0	0	0	0	0.745667	x	0.307092	0.745667	0.288908	0.222594
AAEL001929	Signal Transduction	Cytokin	SPZ	SPZ	high	SPZ5	spz5	x	0	0	0	0	0.668177	x	0	0.668177	0.233517	0
AAEL012164	Signal Transduction	Cytokin	SPZ	SPZ	high	SPZ6	spz6	x	0	0	0	0	0.120218	x	0.120218	0.118137	0	0
AAEL021557	Signal Transduction	PathMod	IMDMOD	PIRK	high	pirk	pirk	x	23.7541	100	14.3781	54.4582	356.413	x	84.6625	356.413	51.2452	194.096
AAEL021793	Signal Transduction	PathMod	IMDMOD	UBIQUI	high	-	POSH	x	100	37.523	48.8674	8.57298	1.45167	x	1.45167	0.54471	0.709393	0.124451
AAEL023060	Signal Transduction	PathMod	IMDMOD	UBIQUI	high	-	scny	x	100	26.2165	30.9502	17.9678	4.32359	x	4.32359	1.13349	1.33816	0.776855
AAEL014642	Signal Transduction	PathMod	IMDMOD	UBIQUI	high	ben	ben	x	100	95.4431	56.7665	84.1715	56.7248	x	56.7248	54.1398	32.2007	47.7461
AAEL003103	Signal Transduction	PathMod	IMDMOD	UBIQUI	high	eff	eff	x	99.8401	100	55.8943	36.9136	143.988	x	143.758	143.988	80.481	53.1511
AAEL013253	Signal Transduction	PathMod	IMDMOD	UBIQUI	high	-	CYLD	x	80.7747	100	33.2467	53.7499	31.6079	x	25.5312	31.6079	10.5086	16.9892
AAEL011873	Signal Transduction	PathMod	IMDMOD	UBIQUI	high	Uev1A	Uev1A	x	72.738	100	41.6076	33.9342	99.5322	x	72.3977	99.5322	41.4129	33.7755
AAEL015099	Signal Transduction	PathMod	JASTMOD	PIAS	high	PIAS1	Su(var)2-10	x	100	0	29.8745	0	1.62942	x	1.62942	0	0.486781	0
AAEL026694	Signal Transduction	PathMod	JASTMOD	PIAS	high	PIAS2	Su(var)2-10	x	76.964	100	45.3111	33.5368	18.8424	x	14.5019	18.8424	8.5377	6.31913
AAEL001919	Signal Transduction	PathMod	JASTMOD	PTP61F	high	-	Ptp61F	x	70.0543	100	26.2536	25.693	32.6852	x	22.8974	32.6852	8.58104	8.3978
AAEL019728	Signal Transduction	PathMod	JASTMOD	SOCS	high	SOCS	Socs36E	x	83.0409	100	34.3077	18.6624	58.0042	x	48.1672	58.0042	19.8999	10.825
AAEL000255	Signal Transduction	PathMod	JASTMOD	SOCS	high	-	Socs44A	x	0	0	0	0	0.508736	x	0.421146	0.291727	0.217123	0.508736
AAEL000709	Signal Transduction	PathMod	TOLLMOD	CACT	high	cact	cact	x	75.7396	89.509	100	36.2713	40.9253	x	30.9966	36.6318	40.9253	14.8441
AAEL013167	Signal Transduction	PathMod	TOLLMOD	CACTIN	high	-	cactin	x	87.8288	100	54.0341	41.5324	6.53237	x	5.7373	6.53237	3.52971	2.71305
AAEL005339	Signal Transduction	PathMod	TOLLMOD	HRS	high	-	Hrs	x	70.5895	100	28.5182	51.4847	19.6891	x	13.8984	19.6891	5.61497	10.1369
AAEL018205	Signal Transduction	PathMod	TOLLMOD	MOP	high	-	mop	x	86.3096	100	29.2922	36.2757	27.8184	x	24.01	27.8184	8.14862	10.0913
AAEL021839	Signal Transduction	PathMod	TOLLMOD	PELLINO	high	-	Pli	x	73.7744	100	29.3873	48.301	21.397	x	15.7855	21.397	6.288	10.335
AAEL025779	Signal Transduction	PathMod	TOLLMOD	UBIQUI	high	-	lwr	x	100	67.3457	54.0948	19.5784	63.0596	x	63.0596	42.4679	34.112	12.346
AAEL003371	Signal Transduction	PathMod	TOLLMOD	UBIQUI	high	-	slmb	x	99.7426	100	52.5081	27.363	41.8803	x	41.7725	41.8803	21.9905	11.4597
AAEL027903	Signal Transduction	PathMod	TOLLMOD	UBIQUI	high	-	lwr	x	71.1879	100	59.9914	32.9148	64.1059	x	45.6356	64.1059	38.458	21.1003
AAEL022729	Signal Transduction	PathSig	IMDSIG	AKIRIN	high	-	akirin	x	100	90.134	55.8875	29.8884	80.403	x	80.403	72.4704	44.9352	24.0312
AAEL027860	Signal Transduction	PathSig	IMDSIG	CASPAR	high	casp	casp	x	100	64.587	48.4918	40.5487	72.2165	x	72.2165	46.6425	35.0191	29.2829
AAEL001932	Signal Transduction	PathSig	IMDSIG	DEATH	high	FADD	Fadd	x	45.4513	100	27.4098	40.0614	5.95543	x	2.70682	5.95543	1.63237	2.38583
AAEL010083	Signal Transduction	PathSig	IMDSIG	DEATH	high	IMD	imd	x	63.3434	100	27.8566	50.2345	1.42522	x	0.902783	1.42522	0.397018	0.715954
AAEL000590	Signal Transduction	PathSig	IMDSIG	DNR1	high	DNR1	dnr1	x	100	80.6852	16.7692	64.7482	76.0364	x	76.0364	61.3501	12.7507	49.2322
AAEL014557	Signal Transduction	PathSig	IMDSIG	HOMEOBOX	high	cad	cad	x	5.25614	3.0124	91.3519	100	17.5276	x	0.921277	0.528002	16.0118	17.5276
AAEL023627	Signal Transduction	PathSig	IMDSIG	IKK	high	-	key	x	100	79.1225	22.9325	69.6677	14.8897	x	14.8897	11.7811	3.41459	10.3733
AAEL003245	Signal Transduction	PathSig	IMDSIG	IKK	high	IKK1	IKKbeta	x	76.0608	100	32.2762	82.8969	8.70887	x	6.62404	8.70887	2.81089	7.21938
AAEL012510	Signal Transduction	PathSig	IMDSIG	IKK	high	IKK2	key	x	11.6358	100	15.6869	12.2217	19.2239	x	2.23686	19.2239	3.01564	2.3495
AAEL005073	Signal Transduction	PathSig	IMDSIG	IKK	high	-	key	x	0	0	0	0	0.535199	x	0.535199	0.156882	0.308839	0
AAEL005079	Signal Transduction	PathSig	IMDSIG	IKK	high	-	key	x	0	0	0	0	0.581239	x	0.581239	0	0.179895	0
AAEL018130	Signal Transduction	PathSig	IMDSIG	KINASE	high	TAK1	Tak1	x	56.9236	100	46.6369	12.712	6.31814	x	3.59651	6.31814	2.94659	0.803164
AAEL007624	Signal Transduction	PathSig	IMDSIG	REL	high	REL2	Rel	x	40.6539	100	30.9361	24.4978	27.6977	x	11.2602	27.6977	8.56859	6.78533
AAEL026170	Signal Transduction	PathSig	IMDSIG	TAB2	high	tab2	Tab2	x	100	84.3076	34.5478	54.3648	7.95823	x	7.95823	6.70939	2.74939	4.32647
AAEL012471	Signal Transduction	PathSig	JASTSIG	DOME	high	DOME	dome	x	62.6199	100	19.0392	14.8611	25.3653	x	15.8837	25.3653	4.82935	3.76957
AAEL012553	Signal Transduction	PathSig	JASTSIG	HOP	high	HOP	hop	x	76.2063	100	28.6709	52.1618	9.76269	x	7.43979	9.76269	2.79906	5.0924
AAEL020559	Signal Transduction	PathSig	JASTSIG	STAT	high	STAT	Stat92E	x	100	85.7279	52.7028	50.1751	121.947	x	121.947	104.542	64.2693	61.1868
AAEL000200	Signal Transduction	PathSig	JASTSIG	VAGO	high	-	CG14132	x	100	10.0657	1.42401	1.14403	20.4125	x	20.4125	2.05465	0.290676	0.233526
AAEL009551	Signal Transduction	PathSig	TOLL	TOLL	high	TOLL11	Toll-6	x	100	21.7529	40.2702	60.9771	2.42727	x	2.42727	0.528002	0.977467	1.48008
AAEL002583	Signal Transduction	PathSig	TOLL	TOLL	high	TOLL7	Toll-7	x	92.1223	100	82.3656	41.6808	2.31487	x	2.13251	2.31487	1.90665	0.964856
AAEL026297	Signal Transduction	PathSig	TOLL	TOLL	high	-	Tl	x	73.3152	100	1.97461	19.0678	7.27081	x	5.33061	7.27081	0.14357	1.38638
AAEL007619	Signal Transduction	PathSig	TOLL	TOLL	high	TOLL5A	Tl	x	14.9503	100	3.41988	0	2.15075	x	0.321544	2.15075	0.0735532	0
AAEL013441	Signal Transduction	PathSig	TOLL	TOLL	high	TOLL9A	Toll-9	x	97.9069	100	18.3951	75.8957	101.793	x	99.6622	101.793	18.7249	77.2564
AAEL014896	Signal Transduction	PathSig	TOLL	TOLL	high	-	Toll-9	x	21.8263	13.1874	100	48.689	431.079	x	94.0887	56.848	431.079	209.888
AAEL027951	Signal Transduction	PathSig	TOLL	TOLL	high	-	Tl	x	0	0	0	0	0	x	0	0	0	0
AAEL004000	Signal Transduction	PathSig	TOLL	TOLL	high	TOLL10	Tollo	x	0	0	0	0	0.135383	x	0.0934372	0	0	0.135383
AAEL000057	Signal Transduction	PathSig	TOLL	TOLL	high	TOLL5B	Tl	x	0	0	0	0	0.134845	x	0.114053	0.134845	0	0
AAEL000671	Signal Transduction	PathSig	TOLL	TOLL	high	TOLL6	Toll-6	x	0	0	0	0	0	x	0	0	0	0
AAEL000633	Signal Transduction	PathSig	TOLL	TOLL	high	TOLL8	Tollo	x	0	0	0	0	0.560623	x	0.560623	0	0	0
AAEL006571	Signal Transduction	PathSig	TOLLSIG	DEATH	high	PELLE	pll	x	100	97.6694	37.0575	31.9073	10.0093	x	10.0093	9.77597	3.70918	3.19369
AAEL007642	Signal Transduction	PathSig	TOLLSIG	DEATH	high	TUBE	-	x	81.6385	100	63.1656	62.2216	9.30308	x	7.5949	9.30308	5.87635	5.78853
AAEL007768	Signal Transduction	PathSig	TOLLSIG	DEATH	high	MYD	Myd88	x	65.0435	100	35.6792	49.1764	7.96292	x	5.17937	7.96292	2.84111	3.91588
AAEL007696	Signal Transduction	PathSig	TOLLSIG	REL	high	REL1A	dl	x	86.7909	100	49.7509	47.6347	28.5075	x	24.7419	28.5075	14.1827	13.5795
AAEL027765	Signal Transduction	PathSig	TOLLSIG	REL	high	-	dl	x	0	0	0	0	0	x	0	0	0	0
AAEL006930	Signal Transduction	PathSig	TOLLSIG	REL	high	REL1B	dl	x	0	0	0	0	0.156882	x	0	0.156882	0	0
AAEL028236	Signal Transduction	PathSig	TOLLSIG	TRAF	high	-	Traf-like	x	75.5302	100	60.183	23.8537	5.98424	x	4.51991	5.98424	3.60149	1.42746
AAEL001515	Stress	CaspaseSig	BCL2	Bcl2	high	DEBCL	Debcl	x	60.4583	55.6353	100	17.2828	1.50343	x	0.908948	0.836437	1.50343	0.259834
AAEL021581	Stress	CaspaseSig	BCL2	Bcl2	high	-	Buffy	x	33.3883	22.1898	100	33.9908	58.7612	x	19.6194	13.039	58.7612	19.9734
AAEL026744	Stress	CaspaseSig	CASP	Caspase	high	-	-	x	63.6718	100	42.4074	96.2385	63.5602	x	40.4699	63.5602	26.9542	61.1694
AAEL014148	Stress	CaspaseSig	CASP	CASPL	high	Dredd	Dredd	x	85.7357	100	28.1413	40.2407	3.80882	x	3.26552	3.80882	1.07185	1.5327
AAEL011562	Stress	CaspaseSig	CASP	CASPL	high	Dronc	Dronc	x	57.5356	100	28.82	77.6779	24.2811	x	13.9703	24.2811	6.99781	18.8611
AAEL005956	Stress	CaspaseSig	CASP	CASPS	high	CASPS16	Damm	x	100	94.8555	42.9298	35.2565	20.9568	x	20.9568	19.8787	8.9967	7.38862
AAEL017498	Stress	CaspaseSig	CASP	CASPS	high	CASPS21	Damm	x	75.8561	100	30.1453	38.4191	11.7106	x	8.8832	11.7106	3.53019	4.4991
AAEL005955	Stress	CaspaseSig	CASP	CASPS	high	CASPS17	Damm	x	97.0401	100	78.2544	81.6362	9.49681	x	9.21571	9.49681	7.43167	7.75284
AAEL003444	Stress	CaspaseSig	CASP	CASPS	high	CASPS19	Decay	x	83.4012	100	32.8792	44.6339	22.8616	x	19.0668	22.8616	7.5167	10.204
AAEL014348	Stress	CaspaseSig	CASP	CASPS	high	CASPS8	-	x	46.9155	100	17.4017	36.4683	17.19	x	8.0648	17.19	2.99137	6.26892
AAEL003439	Stress	CaspaseSig	CASP	CASPS	high	CASPS18	Decay	x	57.7296	80.5017	100	33.6026	4.33172	x	2.50068	3.48711	4.33172	1.45557
AAEL012143	Stress	CaspaseSig	CASP	CASPS	high	CASPS7	Dcp-1	x	0	0	0	0	0.207491	x	0.207491	0.118137	0.163501	0.135383
AAEL000874	Stress	CaspaseSig	CASPA	ARK	high	ARK	Dark	x	20.1603	33.0172	29.6895	100	9.94707	x	2.00536	3.28425	2.95324	9.94707
AAEL012446	Stress	CaspaseSig	IAP	IAP	high	IAP6	Bruce	x	100	92.7823	48.6323	35.3715	51.9738	x	51.9738	48.2225	25.2761	18.3839
AAEL014251	Stress	CaspaseSig	IAP	IAP	high	IAP5	Det	x	47.1272	100	9.51983	20.7561	1.54526	x	0.728238	1.54526	0.147106	0.320736
AAEL006633	Stress	CaspaseSig	IAP	IAP	high	IAP2	Diap2	x	92.7053	100	52.8744	60.8376	6.75194	x	6.25941	6.75194	3.57005	4.10772
AAEL009074	Stress	CaspaseSig	IAP	IAP	high	IAP1	Diap1	x	81.2053	100	50.5946	19.9776	65.0324	x	52.8098	65.0324	32.9029	12.9919
AAEL001501	Stress	CaspaseSig	IAP	IAP	high	-	CIAPIN1	x	58.4321	100	20.9111	24.3413	109.051	x	63.7207	109.051	22.8038	26.5445
AAEL004392	Stress	CaspaseSig	IAP ANTAGONIST	anti-IAP	high	IMP	-	x	69.5616	100	21.6916	57.072	1.01726	x	0.707622	1.01726	0.22066	0.58057
AAEL014196	Stress	CaspaseSig	IAP ANTAGONIST	anti-IAP	high	-	-	x	16.4535	100	25.8327	23.7744	2.02919	x	0.333873	2.02919	0.524193	0.482428
AAEL013407	Stress	Ox-Stress	CAT	CAT	high	Cat	Cat	x	54.4682	100	2.57858	11.4034	1714.92	x	934.088	1714.92	44.2207	195.56
AAEL024885	Stress	Ox-Stress	GST	GST_other	high	-	CG10428	x	100	80.3643	58.9513	44.7744	25.4253	x	25.4253	20.4328	14.9885	11.384
AAEL023692	Stress	Ox-Stress	GST	GST_other	high	-	GstE11	x	100	14.9017	7.28885	6.71098	35.1094	x	35.1094	5.23188	2.55907	2.35619
AAEL026530	Stress	Ox-Stress	GST	GST_other	high	-	GstD1	x	100	77.5279	0	0	3.50519	x	3.50519	2.7175	0	0
AAEL025929	Stress	Ox-Stress	GST	GST_other	high	-	GstT1	x	67.8596	100	47.4688	54.347	75.834	x	51.4606	75.834	35.9975	41.2134
AAEL024134	Stress	Ox-Stress	GST	GST_other	high	-	GstE11	x	64.6834	100	0.555244	8.97979	71.7698	x	46.4231	71.7698	0.398498	6.44478
AAEL027519	Stress	Ox-Stress	GST	GST_other	high	-	GstE11	x	64.677	100	0.55519	8.97891	71.7768	x	46.4231	71.7768	0.398498	6.44478
AAEL027003	Stress	Ox-Stress	GST	GST_other	high	-	GstE11	x	28.0624	100	0.706562	11.0923	523.835	x	147.001	523.835	3.70122	58.1056
AAEL007017	Stress	Ox-Stress	GST	GST_other	high	-	CG10428	x	0	0	0	0	0.545052	x	0.29831	0.545052	0.101678	0
AAEL007026	Stress	Ox-Stress	GST	GST_other	high	-	CG10428	x	0	0	0	0	0.114053	x	0.114053	0	0	0
AAEL025173	Stress	Ox-Stress	GST	GST_other	high	-	GstE11	x	0	0	0	0	0.186221	x	0.186221	0.0911779	0	0
AAEL020409	Stress	Ox-Stress	GST	GST_other	high	-	GstE11	x	0	0	0	0	0.186221	x	0.186221	0.0911779	0	0
AAEL022511	Stress	Ox-Stress	GST	GST_other	high	-	GstE11	x	0	0	0	0	5.02168e-05	x	1.05952e-05	5.02168e-05	0	2.37045e-06
AAEL001054	Stress	Ox-Stress	GST	GSTD	high	GSTD4	-	x	57.0594	100	0.448474	13.0054	48.4138	x	27.6246	48.4138	0.217123	6.29642
AAEL010591	Stress	Ox-Stress	GST	GSTD	high	GSTD6	-	x	52.907	100	54.2582	38.0942	15.598	x	8.25244	15.598	8.46319	5.94194
AAEL010582	Stress	Ox-Stress	GST	GSTD	high	GSTD11	GstD1	x	47.5301	100	33.4072	91.981	104.19	x	49.5217	104.19	34.807	95.8351
AAEL001059	Stress	Ox-Stress	GST	GSTD	high	GSTD3	-	x	10.5984	100	6.6706	0	1.07614	x	0.114053	1.07614	0.0717849	0
AAEL001061	Stress	Ox-Stress	GST	GSTD	high	GSTD1	GstD1	x	56.0702	100	0.335378	1.11004	1452.39	x	814.36	1452.39	4.87102	16.1222
AAEL001071	Stress	Ox-Stress	GST	GSTD	high	GSTD5	GstD1	x	42.0844	100	68.479	69.3577	3.14407	x	1.32316	3.14407	2.15303	2.18066
AAEL001090	Stress	Ox-Stress	GST	GSTD	high	GSTD7	GstD11	x	0	0	0	0	0.668177	x	0	0.668177	0	0.0981425
AAEL007951	Stress	Ox-Stress	GST	GSTE	high	GSTE2	GstE11	x	100	14.9017	7.28884	6.71098	35.1094	x	35.1094	5.23188	2.55907	2.35619
AAEL007962	Stress	Ox-Stress	GST	GSTE	high	GSTE4	GstE11	x	71.7404	100	4.02288	30.3272	430.136	x	308.581	430.136	17.3039	130.448
AAEL007946	Stress	Ox-Stress	GST	GSTE	high	GSTE6	GstE11	x	71.2925	100	24.927	19.5603	77.6215	x	55.3383	77.6215	19.3487	15.183
AAEL007947	Stress	Ox-Stress	GST	GSTE	high	GSTE3	GstE11	x	69.7254	100	5.26159	6.1776	63.1685	x	44.0445	63.1685	3.32367	3.9023
AAEL007948	Stress	Ox-Stress	GST	GSTE	high	GSTE7	GstE11	x	64.6834	100	0.555244	8.97979	71.7698	x	46.4231	71.7698	0.398498	6.44478
AAEL007954	Stress	Ox-Stress	GST	GSTE	high	GSTE1	GstE11	x	0	0	0	0	0.508418	x	0.508418	0.26969	0.161732	0
AAEL007964	Stress	Ox-Stress	GST	GSTE	high	GSTE5	GstE11	x	0	0	0	0	0.186221	x	0.186221	0.0911779	0	0
AAEL007955	Stress	Ox-Stress	GST	GSTE	high	GSTE8	GstE14	x	0	0	0	0	0.120218	x	0.120218	0	0	0
AAEL011752	Stress	Ox-Stress	GST	GSTI	high	GSTI1	gfzf	x	47.8729	100	35.3105	17.3459	4.01755	x	1.92332	4.01755	1.41862	0.69688
AAEL017085	Stress	Ox-Stress	GST	GSTO	high	GSTO1	GstO1	x	49.6355	100	15.4077	32.563	37.5009	x	18.6138	37.5009	5.77803	12.2114
AAEL011741	Stress	Ox-Stress	GST	GSTS	high	GSTS1	GstS1	x	48.193	100	5.09672	15.0357	1428.13	x	688.259	1428.13	72.7878	214.729
AAEL009016	Stress	Ox-Stress	GST	GSTT	high	GSTT2	GstT1	x	68.0108	100	48.392	34.9864	10.6865	x	7.26796	10.6865	5.1714	3.73881
AAEL009017	Stress	Ox-Stress	GST	GSTT	high	GSTT1	GstT1	x	58.9881	100	30.5717	60.2297	79.7017	x	47.0145	79.7017	24.3661	48.0041
AAEL004229	Stress	Ox-Stress	GST	GSTT	high	GSTT4	GstT4	x	12.9508	67.4401	8.16448	100	23.7763	x	3.07921	16.0348	1.94121	23.7763
AAEL010500	Stress	Ox-Stress	GST	GSTX	high	GSTX2	-	x	59.6569	100	3.98489	30.1532	22.1834	x	13.2339	22.1834	0.883983	6.689
AAEL000092	Stress	Ox-Stress	GST	GSTX	high	GSTX1	-	x	44.8589	64.6704	95.0376	100	94.7263	x	42.4932	61.2599	90.0256	94.7263
AAEL011934	Stress	Ox-Stress	GST	GSTZ	high	GSTZ1	GstZ2	x	70.1887	100	13.1008	13.5438	32.0534	x	22.4978	32.0534	4.19924	4.34125
AAEL008397	Stress	Ox-Stress	PRDX	GPX	high	GPXH2	-	x	100	68.2559	12.9129	10.8773	24.6243	x	24.6243	16.8075	3.17972	2.67846
AAEL012069	Stress	Ox-Stress	PRDX	GPX	high	GPXH1	PHGPx	x	40.4849	100	6.93327	20.4542	504.822	x	204.377	504.822	35.0007	103.258
AAEL000495	Stress	Ox-Stress	PRDX	GPX	high	GPXH3	-	x	0	0	0	0	0.134845	x	0	0.134845	0	0
AAEL000342	Stress	Ox-Stress	PRDX	HPX	high	-	Pxn	x	100	82.3107	24.8392	28.5734	2.41359	x	2.41359	1.98664	0.599515	0.689645
AAEL020747	Stress	Ox-Stress	PRDX	HPX	high	-	CG10211	x	100	49.5121	23.2461	20.7751	1.7231	x	1.7231	0.853145	0.400554	0.357977
AAEL011941	Stress	Ox-Stress	PRDX	HPX	high	-	cd	x	82.4988	100	82.964	43.94	1.20756	x	0.996221	1.20756	1.00184	0.530601
AAEL000496	Stress	Ox-Stress	PRDX	HPX	high	-	-	x	44.7523	100	0.358028	0.666277	246.41	x	110.274	246.41	0.882215	1.64177
AAEL013171	Stress	Ox-Stress	PRDX	HPX	high	HPX2	Irc	x	38.5007	100	6.01682	42.2105	10.2071	x	3.92979	10.2071	0.614141	4.30845
AAEL017467	Stress	Ox-Stress	PRDX	HPX	high	-	-	x	0	0	0	0	0.156882	x	0	0.156882	0	0
AAEL019639	Stress	Ox-Stress	PRDX	HPX	high	-	CG42331	x	0	0	0	0	0.81973	x	0.0934372	0.81973	0	0.0981425
AAEL026038	Stress	Ox-Stress	PRDX	HPX	high	-	Pxt	x	0	0	0	0	0.307092	x	0.307092	0	0	0.270766
AAEL000507	Stress	Ox-Stress	PRDX	HPX	high	-	-	x	0	0	0	0	0.156882	x	0	0.156882	0.0735532	0
AAEL006014	Stress	Ox-Stress	PRDX	HPX	high	HPX1	Pxd	x	0	0	0	0	0.627529	x	0.186874	0.627529	0.0899474	0.124451
AAEL002354	Stress	Ox-Stress	PRDX	HPX	high	HPX5	cysu	x	0	0	0	0	0.134845	x	0.114053	0.134845	0	0
AAEL004388	Stress	Ox-Stress	PRDX	HPX	high	HPX8A	Pxt	x	0	0	0	0	0.594925	x	0.594925	0.156882	0	0
AAEL004390	Stress	Ox-Stress	PRDX	HPX	high	HPX8B	Pxt	x	0	0	0	0	0	x	0	0	0	0
AAEL004386	Stress	Ox-Stress	PRDX	HPX	high	pxt	Pxt	x	0	0	0	0	0.240436	x	0.240436	0.156882	0	0
AAEL013528	Stress	Ox-Stress	PRDX	TPX	high	TPX1	Prx3	x	100	99.8371	85.0943	53.7995	35.8439	x	35.8439	35.7856	30.5011	19.2839
AAEL007135	Stress	Ox-Stress	PRDX	TPX	high	-	Prx5	x	83.0488	100	78.2144	58.6865	46.6877	x	38.7736	46.6877	36.5165	27.3994
AAEL002309	Stress	Ox-Stress	PRDX	TPX	high	TPX4	Prx2540-1	x	39.236	100	0.234349	18.2801	3442.71	x	1350.78	3442.71	8.06794	629.331
AAEL009051	Stress	Ox-Stress	PRDX	TPX	high	TPX5	Prx6005	x	45.2004	100	6.5026	5.65026	86.6422	x	39.1626	86.6422	5.63399	4.89551
AAEL025567	Stress	Ox-Stress	PRDX	TPX	high	-	Jafrac2	x	71.1796	64.0578	100	35.6315	91.0513	x	64.81	58.3255	91.0513	32.443
AAEL019408	Stress	Ox-Stress	PRDX	TPX	high	-	Jafrac1	x	17.823	78.8241	55.289	100	80.8739	x	14.4142	63.7481	44.7143	80.8739
AAEL019937	Stress	Ox-Stress	SOD	SODCuZn	high	-	Sod1	x	69.3455	100	7.48986	10.2673	1442.54	x	1000.33	1442.54	108.044	148.109
AAEL006271	Stress	Ox-Stress	SOD	SODCuZn	high	CUSOD2	Sod3	x	83.1427	100	2.86825	1.91718	23.7911	x	19.7806	23.7911	0.682389	0.456119
AAEL019938	Stress	Ox-Stress	SOD	SODCuZn	high	CUSOD4	-	x	56.9453	100	7.35781	5.16652	6.41957	x	3.65564	6.41957	0.472339	0.331668
AAEL019759	Stress	Ox-Stress	SOD	SODCuZn	high	-	CG5948	x	30.7429	100	19.2804	10.2814	3.48178	x	1.0704	3.48178	0.6713	0.357977
AAEL019761	Stress	Ox-Stress	SOD	SODCuZn	high	-	CG5948	x	0	0	0	0	0	x	0	0	0	0
AAEL025388	Stress	Ox-Stress	SOD	SODMnFe	high	-	Sod2	x	81.5741	100	37.2895	43.9125	49.3453	x	40.253	49.3453	18.4006	21.6687
AAEL004823	Stress	Ox-Stress	SOD	SODMnFe	high	MNSOD1	Sod2	x	0	0	0	0	0	x	0	0	0	0
AAEL005108	Stress	Ox-Stress	SOD	SODMnFe	high	MNSOD2	Sod2	x	0	0	0	0	0.120218	x	0.120218	0	0.0899474	0
