# Supplementary material for: A transcriptomic atlas of Aedes aegypti reveals detailed functional organization of major body parts and gut regional specializations in sugar-fed and blood-fed adult females
Source: eLife. 2022 Apr 26;11:e76132. doi: 10.7554/eLife.76132 (PMC9113746; doi:10.7554/eLife.76132)
Supplement: Supplementary file 6. [file elife-76132-supp6.xlsx]

## Sheet: Criteria
Inclusion criteria:
Genes are expressed >5 TPM in whole gut or in one or more midgut regions
Lacking a whole body sample for Anopheles, we did not screen for gut enrichment to maintain parity

## Sheet: Lipid Digestion
Gene ID	Putative function	Whole Gut	Prov	Ant	Post
AAEL012340	Other Lipase	1.70364	13.5261	9.45344	0.801109
AAEL000558	Other Lipase	3.50688	17.7829	0.910305	0.885751
AAEL011528	Other Lipase	0.762032	17.8208	1.93599	0.0899474
AAEL004933	Other Lipase	26.4776	0.244398	7.73514	33.1185
AAEL006982	Other Lipase	10.2754	23.0409	46.5716	6.33812
AAEL007874	Other Lipase	48.4573	39.9539	41.1416	45.379
AAEL007055	Other Lipase	108.378	6.25846	59.318	99.969
AAEL001837	Other Lipase	150.801	6.25275	11.217	177.735
AAEL012341	Other Lipase	1.25831	6.23361	2.24792	0.980139
AAEL005706	Other Lipase	5.85828	10.1012	7.29822	3.6436
AAEL006966	Other Lipase	38.4686	7.54209	11.757	37.0882
AAEL012311	Other Lipase	1.10222	8.47744	0.748854	0.524193
AAEL007060	Phospholipase	6.39066	0.35461	4.82219	4.77309
AAEL009876	Phospholipase	1.45521	6.47876	1.14938	0.94291
AAEL005600	Phospholipase	2.98219	7.55985	4.40509	1.81227
AAEL003651	Phospholipase	4.29595	10.1814	10.3289	2.91868
AAEL005969	Phospholipase	1.44734	11.4467	0.970796	0.742182
AAEL001241	Phospholipase	1.69298	34.108	28.9417	0.14357
AAEL019751	Phospholipase	23.1683	61.4556	56.3056	24.1674
AAEL013170	Phospholipase	2.71993	4.80921	5.27569	2.54513
AAEL007092	Phospholipase	36.1991	53.9989	46.4417	30.6432
AAEL018273	Phospholipase	3.48597	3.61144	6.684	2.94659
AAEL011918	Phospholipase	2.94593	6.94854	4.57559	3.49071
AAEL025404	Phospholipase	4.08839	9.62537	9.11419	3.02062
AAEL009380	Phospholipase	2.00759	11.3008	6.10913	0.738645
AAEL004431	Phospholipase	5.79341	11.9667	8.10621	3.99674
AAEL012835	Phospholipase	24.3963	15.3708	18.0467	20.7184
AAEL019711	Phospholipase	5.5516	25.0495	16.2951	3.1748
AAEL013979	Phospholipase	14.3317	43.4935	42.1204	10.8001
AAEL012548	Phospholipase	57.5208	39.8773	57.2379	84.9563
AAEL006381	Sphingomyelin phosphodiesterase	100.008	258.254	289.551	126.898
AAEL002009	Sphingomyelin phosphodiesterase	3.29474	12.3804	7.25852	2.86682

## Sheet: Lipid Transporters
Gene ID	Putative function	Whole Gut	Prov	Ant	Post
AAEL000572	Fatty acid transporter	4.00913	13.2255	2.47871	2.3679
AAEL002913	Fatty acid transporter	40.501	71.135	60.2299	32.888
AAEL010047	Fatty acid transporter	24.1091	19.6972	20.0946	19.3811
AAEL008144	Fatty acid transporter	2.63181	5.65908	3.73118	2.76225
AAEL009561	Lipid Carrier Protein	78.8021	552.274	525.003	57.4996
AAEL008789	Lipid Carrier Protein	100.072	421.829	42.0388	11.5973
AAEL009566	Lipid Carrier Protein	2.43757	26.512	42.4291	0.161732
AAEL012704	Lipid Carrier Protein	24.0452	8.31206	33.3297	23.8334
AAEL029014	Lipid Carrier Protein	6.3199	26.2229	19.986	5.22235
AAEL025229	Lipid Carrier Protein	2.79576	0.843407	16.354	2.22745
AAEL009569	Lipid Carrier Protein	11.8944	15.0223	14.0446	1.84017
AAEL008598	Lipid Carrier Protein	0.69845	9.00798	0.228107	0.738645
AAEL016972	Lipid Carrier Protein	7.80067	13.556	27.3682	1.02932
AAEL011278	Lipid Carrier Protein	12.6268	21.7806	19.1624	8.72596
AAEL025330	Lipid Carrier Protein	6.96726	20.1617	20.8216	5.43421
AAEL007534	Lipid Carrier Protein	1.99055	6.14203	7.47545	0.759479
AAEL004682	Other Lipid Transporter	32.7236	49.4232	61.1389	26.8341
AAEL004553	Other Lipid Transporter	15.7403	20.9921	19.2433	10.6733
AAEL026962	Other Lipid Transporter	3.72113	7.38305	7.59643	2.69362
AAEL012549	Phospholipid Transporter	94.2326	134.649	228.95	99.3752
AAEL002163	Phospholipid Transporter	39.5906	126.451	143.43	29.1098
AAEL004141	Phospholipid Transporter	95.7215	104.94	129.265	88.681
AAEL004981	Phospholipid Transporter	18.7206	57.4403	56.6301	13.071
AAEL019580	Phospholipid Transporter	9.77916	38.6073	20.7146	8.25846
AAEL019819	Phospholipid Transporter	16.6578	24.9476	24.3381	12.7674
AAEL023829	Phospholipid Transporter	5.37905	21.6372	16.8102	3.59795
AAEL023393	Phospholipid Transporter	11.8924	13.699	20.744	10.4797
AAEL019531	Phospholipid Transporter	0.952872	7.33943	3.52041	0.380624
AAEL009760	Sterol Transporter	728.727	2092.89	2660.64	833.806
AAEL015136	Sterol Transporter	279.956	121.5	462.017	327.662
AAEL025109	Sterol Transporter	7.78728	9.37564	64.8568	5.60789
AAEL009531	Sterol Transporter	38.7862	1.20385	2.92472	46.3822
AAEL007592	Sterol Transporter	41.3331	3.98977	16.87	39.8489
AAEL012064	Sterol Transporter	18.7173	38.6351	5.96886	1.91598
AAEL007591	Sterol Transporter	25.4296	0.482959	1.58634	37.2227
AAEL026174	Sterol Transporter	5.22125	0.238436	0.327709	10.5259
AAEL019883	Sterol Transporter	22.0922	74.9447	48.6261	15.7397

## Sheet: Amylases, Maltases & Glucosidas
Gene ID	Putative function	Whole Gut	Prov	Ant	Post
AAEL000667	Amylase/Maltase	738.548	9355.84	10561.9	4.46201
AAEL000647	Amylase/Maltase	449.45	3181.47	6173.53	149.514
AAEL000651	Amylase/Maltase	48.3882	139.018	945.003	12.9624
AAEL013421	Amylase/Maltase	31.9294	406.912	592.394	7.12856
AAEL003434	Amylase/Maltase	281.157	89.729	238.547	320.046
AAEL000642	Amylase/Maltase	4.38649	1.09402	126.385	0.288908
AAEL008452	Amylase/Maltase	9.91948	35.5943	45.0251	9.18945
AAEL000678	Amylase/Maltase	2.1494	1.8092	44.4253	0.538819
AAEL008502	Amylase/Maltase	5.15717	12.2625	6.16156	0.645042
AAEL002527	Amylase/Maltase	128.767	138.519	99.5112	97.1677
AAEL010602	Amylase/Maltase	27.2702	36.1992	38.4234	24.0695
AAEL009838	Amylase/Maltase	7.87556	9.89589	10.1721	7.34876
AAEL020371	Glucosidase	246.576	3954.16	6065.28	14.6049
AAEL004369	Glucosidase	362.204	3078.4	3702.22	13.9084
AAEL026915	Glucosidase	48.1048	215.711	368.051	35.6374
AAEL000223	Glucosidase	120.492	33.4957	334.394	140.898
AAEL017226	Glucosidase	91.1777	130.082	126.052	82.7781
AAEL014541	Glucosidase	41.4981	74.296	103.824	31.9653
AAEL005481	Glucosidase	64.5627	91.3434	99.8515	67.3724
AAEL021573	Glucosidase	13.7454	30.1735	34.6993	14.5815
AAEL006276	Glucosidase	17.9593	3.39139	10.5381	21.1065
AAEL015020	Glucosidase	5.14097	0.476747	0.56198	4.71895
AAEL022931	Glucosidase	28.6364	74.5629	53.8762	23.9459
AAEL021375	Glucosidase	13.9662	8.69598	4.6201	12.7568

## Sheet: Sugar Transporters
Gene ID	Putative function	Whole Gut	Prov	Ant	Post
AAEL011368	Transporter	12.7169	76.4313	107.959	4.47396
AAEL010868	Transporter	32.7046	27.3357	92.5617	41.7916
AAEL007050	Transporter	47.1463	0.721145	7.63073	59.7355
AAEL010485	Transporter	9.40641	5.53694	8.48208	7.35105
AAEL012042	Transporter	1.18428	3.24478	5.34294	1.33993
AAEL007128	Transporter	5.14088	2.42026	0.535199	1.12104
AAEL003899	Transporter	219.656	68.9516	199.798	246.272
AAEL026825	Transporter	51.7898	95.8642	26.3207	58.8969
AAEL008232	Transporter	48.4987	14.2826	26.7438	50.3648
AAEL007136	Transporter	5.74314	7.89595	5.25835	7.8064
AAEL010479	Transporter	603.855	3909.37	8821.33	166.566
AAEL010478	Transporter	10.1154	149.483	163.106	0.310607
AAEL019597	Transporter	64.1626	98.9893	147.184	54.2708
AAEL010348	Transporter	35.4121	72.7516	88.9788	42.3464
AAEL023753	Transporter	7.31655	10.9217	8.11506	8.59119
AAEL020018	Transporter	40.2467	7.13143	10.8296	44.0921
AAEL017462	Transporter	86.5256	91.406	89.5898	76.8005
AAEL024264	Transporter	2.13869	5.78755	1.92425	1.11172
AAEL012443	Transporter	9.39113	25.5948	22.0385	6.20956
AAEL000902	Transporter	123.352	41.3914	83.6623	108.342
AAEL004451	Transporter	6.39823	7.73056	15.1274	4.74423
AAEL024953	Transporter	9.28659	1.79106	4.80766	9.93302
AAEL004479	Transporter	0.724822	3.84429	5.22561	0.179895
AAEL020619	Transporter	1.60573	20.5146	14.6867	0
AAEL001289	Transporter	0.373604	10.7579	5.32889	0.290676
AAEL011520	Transporter	21.1315	1.56443	3.3973	23.3445
AAEL010650	Transporter	12.3395	0.843157	0.708979	15.7785
AAEL006274	Transporter	40.1025	279.198	429.405	19.3532
AAEL006264	Transporter	18.0893	12.3816	16.4706	18.6867
AAEL011519	Transporter	11.6224	0	0.568145	18.6269
AAEL002292	Transporter	44.2682	33.4998	20.5535	46.2472
AAEL005353	Transporter	78.1543	104.976	239.341	76.9039
AAEL005349	Transporter	37.4525	3.63629	15.199	47.0884
AAEL006718	Transporter	15.4712	17.6792	16.496	14.0377
AAEL006270	Transporter	7.45442	16.0414	10.888	4.59178
AAEL005849	Transporter	14.3036	7.44837	2.68697	2.37853
AAEL006482	Transporter	8.13423	0.727108	2.665	0.145338

## Sheet: Peptidases
Gene ID	Putative function	Whole Gut	Prov	Ant	Post
AAEL012783	Aminopeptidase	615.328	385.508	713.058	774
AAEL012778	Aminopeptidase	492.761	8.47643	46.4876	578.362
AAEL019536	Aminopeptidase	365.689	21.2431	28.5964	482.187
AAEL012099	Aminopeptidase	65.3505	366.25	465.799	36.7058
AAEL005821	Aminopeptidase	255.263	14.1456	81.9466	300.644
AAEL005808	Aminopeptidase	80.0187	36.5005	223.255	75.7052
AAEL019828	Aminopeptidase	174.15	2.43802	15.6304	211.228
AAEL015247	Aminopeptidase	171.755	8.80334	54.4249	195.904
AAEL025617	Aminopeptidase	81.3449	1.93742	5.62941	112.239
AAEL020609	Aminopeptidase	63.9384	1.68694	8.91054	78.2267
AAEL007892	Aminopeptidase	63.6455	16.5326	12.6812	65.032
AAEL001649	Aminopeptidase	27.4081	36.5202	55.5767	28.6585
AAEL009764	Aminopeptidase	37.6908	24.3972	52.4472	38.1758
AAEL002978	Aminopeptidase	36.5794	37.4755	51.32	33.9728
AAEL017244	Aminopeptidase	44.6192	8.39792	6.40446	49.2601
AAEL018249	Aminopeptidase	18.9499	2.29178	4.23883	21.7574
AAEL026928	Aminopeptidase	7.39269	20.5287	10.8729	0.488734
AAEL008163	Aminopeptidase	13.5519	0	3.17613	19.2172
AAEL012918	Aminopeptidase	15.9141	11.666	15.1461	18.7316
AAEL003194	Aminopeptidase	3.39519	14.2112	5.7271	1.82245
AAEL010960	Aminopeptidase	5.37174	7.77511	10.1481	5.78
AAEL001863	Carboxypeptidase	13520.7	262.862	6485.8	19116.6
AAEL010782	Carboxypeptidase	1629.05	112.161	783.043	2109.52
AAEL010776	Carboxypeptidase	805.01	15.2707	138.154	1056.67
AAEL007926	Carboxypeptidase	315.774	103.629	116.198	363.033
AAEL008599	Carboxypeptidase	115.537	3.2936	71.5353	127.187
AAEL003424	Carboxypeptidase	92.8633	4.34501	49.8612	116.12
AAEL008600	Carboxypeptidase	107.718	3.36145	29.7405	113.914
AAEL008609	Carboxypeptidase	93.2211	49.3431	77.3569	105.362
AAEL005521	Carboxypeptidase	21.4814	104.733	78.9063	13.5384
AAEL017499	Carboxypeptidase	23.3856	61.8389	33.1463	16.3977
AAEL001844	Carboxypeptidase	20.2298	25.392	53.5022	19.6931
AAEL001840	Carboxypeptidase	43.4352	14.2034	49.2911	48.3578
AAEL020960	Carboxypeptidase	30.1278	37.8349	48.3867	27.4999
AAEL028185	Carboxypeptidase	17.2815	26.9331	37.6495	18.2747
AAEL012351	Carboxypeptidase	25.2535	0.36641	1.47016	26.9057
AAEL009291	Carboxypeptidase	5.50563	14.7023	21.3627	3.80797
AAEL001839	Carboxypeptidase	8.20522	0.244398	19.0458	7.07982
AAEL003781	Carboxypeptidase	4.50998	10.2544	13.4197	3.60326
AAEL011658	Carboxypeptidase	4.18965	7.19357	6.6607	2.71799
AAEL009637	Cysteine peptidase	273.966	445.906	699.585	248.357
AAEL002833	Cysteine peptidase	165.15	481.302	565.378	152.459
AAEL023294	Cysteine peptidase	39.9624	138.265	152.951	23.5355
AAEL008041	Cysteine peptidase	54.2496	36.7072	55.0182	60.0964
AAEL005472	Cysteine peptidase	16.0386	35.7454	51.4311	12.37
AAEL006337	Cysteine peptidase	37.562	32.3282	42.3549	37.2789
AAEL003952	Cysteine peptidase	7.0129	28.3511	8.51426	1.97046
AAEL007316	Cysteine peptidase	7.67929	25.9976	1.97935	0.55875
AAEL028188	Cysteine peptidase	6.16988	24.4818	24.2755	2.95027
AAEL018127	Cysteine peptidase	5.49625	8.29305	10.9691	5.66682
AAEL001372	Cysteine peptidase	6.78193	9.1121	7.97558	5.90163
AAEL003951	Cysteine peptidase	2.27769	6.47826	4.56595	0.991228
AAEL009642	Cysteine peptidase	2.49268	4.16018	5.26785	1.99699
AAEL001588	Dipeptidase	49.3889	37.3955	60.5791	58.3815
AAEL000800	Dipeptidase	47.5578	5.43256	13.8417	58.3963
AAEL008893	Dipeptidase	24.0366	41.9676	42.8072	21.3334
AAEL021728	Dipeptidase	33.7243	13.0164	31.2635	32.0441
AAEL000842	Dipeptidase	7.25099	0.482834	0.514583	8.73787
AAEL015110	Dipeptidyl peptidase	265.27	4.63798	73.5058	390.018
AAEL023559	Dipeptidyl peptidase	201.869	5.2565	8.70063	282.374
AAEL002870	Dipeptidyl peptidase	47.1367	114.457	173.816	41.6838
AAEL027166	Dipeptidyl peptidase	44.7014	2.13137	2.70231	66.0613
AAEL023332	Dipeptidyl peptidase	36.3111	39.0828	21.7018	36.2845
AAEL017460	Dipeptidyl peptidase	11.9792	17.7411	6.04378	0.766552
AAEL008373	Dipeptidyl peptidase	6.87754	12.8463	12.4674	4.84173
AAEL014516	Other peptidase	20498	379.34	2440.63	25385.3
AAEL006169	Other peptidase	83.8296	232.232	212.514	62.7974
AAEL000271	Other peptidase	106.627	136.463	142.658	113.483
AAEL008786	Other peptidase	91.9411	90.6454	126.262	94.8755
AAEL009895	Other peptidase	30.8813	113.979	56.9958	20.647
AAEL008862	Other peptidase	22.4766	38.595	43.1778	20.921
AAEL000231	Other peptidase	17.8496	26.4933	29.4136	14.6462
AAEL002225	Other peptidase	18.4075	24.9268	22.3104	15.8016
AAEL020441	Other peptidase	22.0493	1.93134	7.24522	20.8404
AAEL010938	Other peptidase	1.7473	2.62813	9.96105	1.73604
AAEL011369	Other peptidase	2.82854	8.80162	7.41997	1.83043
AAEL008258	Other peptidase	3.82651	6.33177	4.48003	3.45702
AAEL026826	Other peptidase	1.66621	6.23436	0.394365	0
AAEL010788	Other peptidase	4.51865	3.98067	4.63482	5.70287
AAEL014515	Other peptidase	5.69554	3.1409	1.53142	4.91972
AAEL007818	Serine endopeptidase, no CLIP	168584	2731.46	54583.3	185098
AAEL003060	Serine endopeptidase, no CLIP	112088	1719.6	12927.7	129474
AAEL001703	Serine endopeptidase, no CLIP	57694.5	886.618	12464.1	61097.9
AAEL009244	Serine endopeptidase, no CLIP	1465.97	6312.84	12707.1	812.846
AAEL009680	Serine endopeptidase, no CLIP	647.836	11637.4	6610.94	36.2092
AAEL006425	Serine endopeptidase, no CLIP	3483.3	247.117	2142.45	3905.78
AAEL013703	Serine endopeptidase, no CLIP	3097.05	381.497	1623.31	3831.28
AAEL013623	Serine endopeptidase, no CLIP	2298.09	33.3964	127.668	3018.07
AAEL013628	Serine endopeptidase, no CLIP	1697.85	28.2436	123.593	2080.65
AAEL008079	Serine endopeptidase, no CLIP	659.348	1107.47	1089.73	677.12
AAEL023729	Serine endopeptidase, no CLIP	737.505	8.38354	347.581	1089.19
AAEL010196	Serine endopeptidase, no CLIP	547.559	3.99015	10.7938	707.871
AAEL007432	Serine endopeptidase, no CLIP	391.404	29.7124	705.698	435.569
AAEL008097	Serine endopeptidase, no CLIP	137.969	463.829	692.139	110.877
AAEL001690	Serine endopeptidase, no CLIP	672.386	10.4091	27.8473	690.871
AAEL008784	Serine endopeptidase, no CLIP	450.238	9.27609	86.1969	534.945
AAEL008769	Serine endopeptidase, no CLIP	268.523	3.41624	23.0502	400.401
AAEL022646	Serine endopeptidase, no CLIP	300.757	6.0681	214.124	384.214
AAEL013715	Serine endopeptidase, no CLIP	238.565	4.50041	268.701	351.483
AAEL024784	Serine endopeptidase, no CLIP	10.4197	250.338	2.2926	0.308839
AAEL006902	Serine endopeptidase, no CLIP	205.106	3.39214	10.1459	238.44
AAEL008080	Serine endopeptidase, no CLIP	99.4373	238.371	231.978	93.461
AAEL019920	Serine endopeptidase, no CLIP	14.2895	216.42	123.422	1.21542
AAEL013712	Serine endopeptidase, no CLIP	107.838	0.482834	4.00253	173.667
AAEL001693	Serine endopeptidase, no CLIP	139.127	1.20398	6.85277	169.193
AAEL007601	Serine endopeptidase, no CLIP	102.234	1.09948	21.0982	162.859
AAEL009843	Serine endopeptidase, no CLIP	148.896	78.7796	130.638	161.179
AAEL011553	Serine endopeptidase, no CLIP	3.68382	152.313	3.41656	0
AAEL008782	Serine endopeptidase, no CLIP	11.3098	35.1448	116.788	4.45805
AAEL002347	Serine endopeptidase, no CLIP	85.6306	1.70483	4.68387	107.688
AAEL009142	Serine endopeptidase, no CLIP	43.6424	52.0567	102.096	32.1305
AAEL026347	Serine endopeptidase, no CLIP	4.33262	70.7324	30.8198	0.94291
AAEL008767	Serine endopeptidase, no CLIP	3.74305	23.395	58.8825	0.364229
AAEL026804	Serine endopeptidase, no CLIP	14.44	19.4302	31.3309	12.0346
AAEL013284	Serine endopeptidase, no CLIP	31.1391	0.122137	0.582596	20.9573
AAEL011929	Serine endopeptidase, no CLIP	19.1398	1.66855	6.35978	23.6517
AAEL006136	Serine endopeptidase, no CLIP	2.996	21.1694	0.493967	0.253448
AAEL013283	Serine endopeptidase, no CLIP	1.69015	19.7202	6.87704	0.544124
AAEL015109	Serine endopeptidase, no CLIP	0.615064	19.4961	0	0
AAEL002360	Serine endopeptidase, no CLIP	11.6901	0.122137	2.7172	17.2525
AAEL005594	Serine endopeptidase, no CLIP	0.588273	6.73558	14.6536	0
AAEL024934	Serine endopeptidase, no CLIP	8.66201	1.33195	4.06369	13.8849
AAEL006376	Serine endopeptidase, no CLIP	13.7437	0.366535	0.474707	11.8121
AAEL027984	Serine endopeptidase, no CLIP	0.548107	13.7139	0.935729	0.400554
AAEL001674	Serine endopeptidase, no CLIP	12.7518	1.32015	0.655417	12.7481
AAEL006365	Serine endopeptidase, no CLIP	0.814599	1.29593	12.0711	0.163501
AAEL008378	Serine endopeptidase, no CLIP	4.08333	10.5024	11.781	3.54115
AAEL010202	Serine endopeptidase, no CLIP	6.64411	0	0.755019	11.2581
AAEL020362	Serine endopeptidase, no CLIP	3.76243	3.99015	9.40663	1.92659
AAEL007969	Serine endopeptidase, no CLIP	5.89132	8.94472	1.02917	2.33733
AAEL004979	Serine endopeptidase, no CLIP	2.31904	8.89814	0.928798	0.959305
AAEL009682	Serine endopeptidase, no CLIP	0.847861	7.68745	1.27172	0.630535
AAEL014938	Serine endopeptidase, no CLIP	1.2653	5.42064	7.48317	1.0373
AAEL011882	Serine endopeptidase, no CLIP	0.849349	4.05825	7.42669	0.601283
AAEL029072	Serine endopeptidase, no CLIP	1.19859	7.21258	6.52739	0
AAEL006382	Serine endopeptidase, no CLIP	6.77866	0.122262	1.30948	5.86842
AAEL010867	Serine endopeptidase, no CLIP	0.901993	6.45391	2.70682	0.25168
AAEL001789	Serine endopeptidase, no CLIP	3.30007	6.2638	6.05133	1.88052
AAEL006434	Serine endopeptidase, no CLIP	3.19689	5.54253	0.587404	0.0735532

## Sheet: Amino Acid Transporters
Gene ID		Putative function	Whole Gut	Prov	Ant	Post
AAEL002557	-	Amino acid transporter	1.48619	5.29888	7.25967	0.579584
AAEL008406	b(0,+)-type amino acid transporter 1	Amino acid transporter	33.027	25.5881	27.8463	35.4372
AAEL003387	b(0,+)-type amino acid transporter 1, transcript variant X1	Amino acid transporter	5.58919	7.06025	3.0532	0.467035
AAEL009362	cationic amino acid transporter 2, transcript variant X2	Amino acid transporter	29.0517	71.0422	89.311	26.2155
AAEL012131	cationic amino acid transporter 3, transcript variant X1	Amino acid transporter	99.1634	18.7495	30.8649	110.162
AAEL013111	excitatory amino acid transporter 1, transcript variant X1	Amino acid transporter	10.7738	16.2691	50.9191	4.23604
AAEL013109	excitatory amino acid transporter 3	Amino acid transporter	28.1455	175.979	331.199	8.7565
AAEL004496	excitatory amino acid transporter 3, transcript variant X2	Amino acid transporter	23.5531	85.8689	48.2309	18.9077
AAEL000714	excitatory amino acid transporter, transcript variant X1	Amino acid transporter	1.61318	7.80425	0.655417	0.179895
AAEL003524	monocarboxylate transporter 10	Amino acid transporter	17.0621	10.9285	10.1522	14.149
AAEL002527	neutral and basic amino acid transport protein rBAT, transcript variant X2	Amino acid transporter	128.767	138.519	99.5112	97.1677
AAEL024520	proton-coupled amino acid transporter 1-like, transcript variant X3	Amino acid transporter	52.0476	7.62035	10.9903	70.0016
AAEL007191	proton-coupled amino acid transporter-like protein CG1139	Amino acid transporter	32.3067	4.70496	5.10519	40.4542
AAEL003956	proton-coupled amino acid transporter-like protein CG1139, transcript variant X1	Amino acid transporter	8.35487	14.9599	16.5029	7.55485
AAEL002214	proton-coupled amino acid transporter-like protein CG1139, transcript variant X4	Amino acid transporter	8.53601	22.883	23.6014	5.0522
AAEL025597	proton-coupled amino acid transporter-like protein CG1139, transcript variant X5	Amino acid transporter	3.66005	27.9078	2.34829	0.179895
AAEL003970	proton-coupled amino acid transporter-like protein pathetic, transcript variant X2	Amino acid transporter	544.482	10.7125	77.1187	590.994
AAEL007197	proton-coupled amino acid transporter-like protein pathetic, transcript variant X2	Amino acid transporter	21.884	169.737	120.49	13.1139
AAEL005213	proton-coupled amino acid transporter-like protein pathetic, transcript variant X2	Amino acid transporter	67.5158	78.403	59.9232	58.4614
AAEL001114	putative sodium-coupled neutral amino acid transporter 10	Amino acid transporter	19.4189	37.2733	39.2537	18.9908
AAEL019627	sodium-dependent neutral amino acid transporter B(0)AT3, transcript variant X4	Amino acid transporter	2.72741	14.4843	3.93115	1.23005
AAEL027275	transmembrane protein 104 homolog	Amino acid transporter	7.26824	16.318	15.9182	6.78647
AAEL002525	Y+L amino acid transporter 2	Amino acid transporter	9.11337	5.73339	3.74908	3.04141
AAEL014161	Y+L amino acid transporter 2, transcript variant X1	Amino acid transporter	14.7419	46.168	3.49691	16.2679
AAEL003919	Y+L amino acid transporter 2, transcript variant X1	Amino acid transporter	0.582412	12.9002	0.541364	0.235286
AAEL006113	cystinosin homolog, transcript variant X10	Cystine transporter	27.5529	62.6994	59.0788	19.2521
