# Supplementary material for: A transcriptomic atlas of Aedes aegypti reveals detailed functional organization of major body parts and gut regional specializations in sugar-fed and blood-fed adult females
Source: eLife. 2022 Apr 26;11:e76132. doi: 10.7554/eLife.76132 (PMC9113746; doi:10.7554/eLife.76132)
Supplement: Supplementary file 7. [file elife-76132-supp7.xlsx]

## Sheet: Criteria
Inclusion criteria:
Genes are expressed >5 TPM in whole gut or in one or more midgut regions
Lacking a whole body sample, we did not screen for gut enrichment

## Sheet: Lipid Digestion
Gene ID	Putative function	Whole Gut	Prov	Ant	Post
AGAP008542	Other Lipase	21.3833	25.1176	27.8231	20.943
AGAP028206	Other Lipase	4.39052	8.47486	8.01418	2.74901
AGAP002353	Other Lipase	1021.63	4.62677	52.7281	1313.14
AGAP002872	Other Lipase	5.90481	0.122459	0.221124	7.42373
AGAP012189	Other Lipase	87.2076	17.7019	40.2843	104.699
AGAP002567	Other Lipase	9.23528	6.88743	17.1348	9.61621
AGAP006819	Other Lipase	14.4983	7.65867	14.0552	17.9258
AGAP010930	Other Lipase	17.7603	159.036	3.247	0.357658
AGAP009104	Other Lipase	39.3431	22.9358	32.6138	29.7693
AGAP010328	Other Lipase	4.5243	0.297205	0.364724	5.34775
AGAP001652	Other Lipase	3.63955	5.37829	2.58513	2.42162
AGAP029607	Other Lipase	9.137	3.7245	1.34348	6.54085
AGAP029277	Other Lipase	14.9974	11.5207	0.455838	4.24473
AGAP010687	Phospholipase	20.4639	16.5226	18.4068	22.2964
AGAP002379	Phospholipase	14.561	14.8076	18.8141	15.1857
AGAP011925	Phospholipase	39.4616	35.6328	29.622	25.2977
AGAP005971	Phospholipase	31.6548	36.2704	33.1485	23.1264
AGAP029661	Phospholipase	34.8635	24.1221	32.0257	31.7539
AGAP011108	Phospholipase	19.1353	17.6079	25.448	16.5257
AGAP011569	Phospholipase	107.403	36.8645	51.4779	109.783
AGAP004812	Phospholipase	7.99872	3.85441	6.3903	7.42988
AGAP000467	Phospholipase	8.66449	8.22149	8.44874	7.7578
AGAP009956	Phospholipase	4.86303	3.82173	4.87591	5.38088
AGAP002529	Phospholipase	13.231	8.32881	4.46589	8.95873
AGAP005650	Phospholipase	5.04802	2.18643	5.52619	5.25739
AGAP009176	Phospholipase	102.441	112.157	100.563	88.8516
AGAP007284	Phospholipase	94.8966	1.4521	6.04961	93.6792
AGAP029533	Phospholipase	6.34022	3.61419	2.52411	4.75553
AGAP001253	Phospholipase	5.83433	5.60888	4.962	4.95527
AGAP008487	Sphingomyelin phosphodiesterase	852.315	56.6504	441.656	927.693
AGAP008053	Sphingomyelin phosphodiesterase	11.1635	9.11082	9.68486	10.0869

## Sheet: Lipid Transporters
Gene ID	Putative function	Whole Gut	Prov	Ant	Post
AGAP002594	Lipid Carrier Protein	15.2808	1.04567	0.543304	0.0685995
AGAP013365	Lipid Carrier Protein	20.2596	37.5546	3.41463	5.62565
AGAP013189	Lipid Carrier Protein	98.1069	27.7879	38.815	131.537
AGAP013400	Lipid Carrier Protein	78.1304	11.2589	37.5196	85.9441
AGAP001826	Lipid Carrier Protein	15.0773	58.6125	12.2598	0.77053
AGAP011478	Lipid Carrier Protein	17.3185	22.884	15.095	3.93424
AGAP010870	Fatty acid transporter	20.0387	2.67835	8.53583	20.1237
AGAP001763	Fatty acid transporter	4.11578	9.04847	1.58914	1.83617
AGAP000704	Phospholipid Transporter	44.3791	41.8553	51.7817	51.14
AGAP010026	Phospholipid Transporter	10.0453	18.2227	18.1786	9.41113
AGAP000390	Phospholipid Transporter	94.4269	45.6129	91.3455	96.1274
AGAP002644	Phospholipid Transporter	84.2127	24.7189	38.5251	74.5009
AGAP011483	Phospholipid Transporter	21.3258	41.4217	36.7047	16.0401
AGAP004469	Phospholipid Transporter	9.13908	6.86006	8.62403	9.28485
AGAP000033	Phospholipid Transporter	6.78048	4.0973	2.64756	3.97384
AGAP008137	Sterol Transporter	92.2461	132.978	88.5456	98.94
AGAP000579	Sterol Transporter	15.4995	0.215881	1.91574	17.5848
AGAP002847	Sterol Transporter	4.97407	0.134085	0.157692	6.22607
AGAP002848	Sterol Transporter	329.634	2.41077	14.3441	419.023
AGAP002857	Sterol Transporter	27.647	14.5648	1.80246	1.97975
AGAP002852	Sterol Transporter	5.95775	0.079711	0.294497	4.10944
AGAP002851	Sterol Transporter	11.0309	0.079711	0.077022	18.5304
AGAP028108	Sterol Transporter	10.6365	1.66589	4.8987	11.1905
AGAP013106	Sterol Transporter	869.679	1358.16	6599.08	141.608
AGAP001956	Sterol Transporter	19.5258	12.0304	64.0641	12.9723

## Sheet: Amylases, Maltases & Glucosidas
Gene ID	Putative function	Whole Gut	Prov	Ant	Post
AGAP002317	Amylase/Maltase	38.6181	137.21	4.66462	27.0482
AGAP012230	Amylase/Maltase	0.999396	13.0332	0.522416	0.0685995
AGAP011939	Amylase/Maltase	4262.48	29.7365	1936.12	4419.09
AGAP012401	Amylase/Maltase	1079.33	4738.45	7085.55	17.0361
AGAP009127	Amylase/Maltase	9.47205	2.01747	2.31002	3.95567
AGAP008963	Amylase/Maltase	465.349	2.3933	93.6421	489.988
AGAP012399	Amylase/Maltase	15.446	2.67674	10.6011	14.8281
AGAP008961	Amylase/Maltase	145.791	1.49651	93.6877	162.881
AGAP012400	Amylase/Maltase	2876.89	3216.58	6838.75	3003.12
AGAP006422	Glucosidase	11.9258	1.26108	3.29949	16.857
AGAP000862	Glucosidase	119.768	73.2325	111.844	121.755
AGAP003993	Glucosidase	3.20894	6.60132	1.07302	1.77841
AGAP001111	Glucosidase	79.0434	41.4808	52.808	96.5925
AGAP003995	Glucosidase	1793.72	4916.38	11625.5	325.937
AGAP008548	Glucosidase	5.51803	2.44876	2.17084	6.67209
AGAP028011	Glucosidase	42.4533	56.9248	51.7044	34.5957
AGAP001534	Glucosidase	59.4852	33.7678	43.5066	72.6028

## Sheet: Sugar Transporters
Gene ID	Putative function	Whole Gut	Prov	Ant	Post
AGAP001027	Transporter	185.572	74.8881	191.106	196.78
AGAP001160	Transporter	7.92866	0.217494	0.077022	0.0685995
AGAP003020	Transporter	33.5338	0.122459	2.56374	42.7898
AGAP003039	Transporter	5.42922	0.726882	1.89622	6.90274
AGAP003357	Transporter	25.5253	23.0766	40.1617	23.6528
AGAP003358	Transporter	28.2968	6.82788	14.3408	11.7728
AGAP003492	Transporter	3.71574	7.82608	6.98167	3.33796
AGAP003493	Transporter	304.389	489.384	1340.62	156.607
AGAP003494	Transporter	114.766	33.8372	146.851	91.7146
AGAP003495	Transporter	56.9686	516.537	123.986	3.8462
AGAP004107	Transporter	5.14214	0.829316	0.606233	1.32443
AGAP004199	Transporter	110.663	15.7354	61.2495	116.759
AGAP004457	Transporter	15.1699	10.6976	11.1536	20.1116
AGAP005236	Transporter	39.5456	26.9097	29.228	42.1171
AGAP005237	Transporter	38.8305	15.6611	30.7548	47.3397
AGAP005238	Transporter	21.1579	53.4411	215.191	1.00915
AGAP005563	Transporter	15.5595	22.8032	7.79179	12.4933
AGAP006344	Transporter	8.14388	9.28093	5.25837	9.55439
AGAP007667	Transporter	7.3704	1.49907	4.92538	6.62708
AGAP007754	Transporter	73.3674	44.8126	57.1542	59.2837
AGAP007856	Transporter	5.8452	18.9231	5.58136	3.38641
AGAP008720	Transporter	9.91655	0.791269	10.3024	8.06862
AGAP008721	Transporter	47.2727	10.7157	20.3856	62.8532
AGAP009274	Transporter	4.55389	10.3524	4.4819	2.93687
AGAP009745	Transporter	115.507	91.2477	68.7548	146.894
AGAP010509	Transporter	130.883	20.545	46.1033	137.258
AGAP010854	Transporter	2.94091	0.0543736	0	5.18815
AGAP010892	Transporter	24.2419	2.40045	4.77209	3.98698
AGAP010943	Transporter	45.0165	3.22423	15.9175	45.4774
AGAP012383	Transporter	20.3062	12.0185	39.1431	18.1055
AGAP013029	Transporter	13.5647	2.82084	18.8015	6.23818
AGAP028006	Transporter	44.15	0.611821	1.2764	1.06564

## Sheet: Peptidases
Gene ID	Putative function	Whole Gut	Prov	Ant	Post
AGAP001037	Aminopeptidase	67.2205	10.7842	18.5552	76.1241
AGAP000887	Aminopeptidase	6.19565	2.27616	3.95291	5.83806
AGAP004109	Aminopeptidase	26.5299	15.0196	4.52755	2.39007
AGAP003077	Aminopeptidase	29.8055	2.33261	4.26338	32.705
AGAP004860	Aminopeptidase	782.333	6.2604	51.7116	1059.89
AGAP013001	Aminopeptidase	7.53625	0.950691	0.866754	0.564732
AGAP007809	Aminopeptidase	574.344	32.4624	152.447	651.146
AGAP013146	Aminopeptidase	1235.96	135.387	756.771	1412.62
AGAP013188	Aminopeptidase	202.2	1.56279	0.270153	215.67
AGAP013255	Aminopeptidase	2743.66	53.9415	884.408	3378.91
AGAP001881	Aminopeptidase	133.183	0.472425	3.27683	155.25
AGAP004809	Aminopeptidase	390.44	1.81953	6.56925	422.969
AGAP013155	Aminopeptidase	54.618	0.495676	1.88993	63.1786
AGAP013150	Aminopeptidase	3.97742	0	0.593144	5.20505
AGAP005728	Aminopeptidase	50.0296	109.018	71.4324	40.9766
AGAP002508	Aminopeptidase	6.5166	4.04131	3.70963	6.86067
AGAP003869	Aminopeptidase	64.0282	19.2346	38.0007	70.9672
AGAP012745	Aminopeptidase	45.0458	0	10.1104	65.7131
AGAP013393	Aminopeptidase	59.7347	0.422519	10.8734	107.287
AGAP012984	Aminopeptidase	445.256	2.1342	4.98038	546.895
AGAP003692	Aminopeptidase	908.567	5.29015	105.62	1022.18
AGAP003695	Aminopeptidase	18.3489	0.108747	1.63383	23.9829
AGAP003475	Aminopeptidase	125.259	35.4264	70.6651	148.52
AGAP000621	Carboxypeptidase	21.5284	0.295592	0	23.4106
AGAP008370	Carboxypeptidase	1017.78	5.23208	51.8087	1149.2
AGAP008372	Carboxypeptidase	46.6859	0.190544	6.76999	53.3014
AGAP008373	Carboxypeptidase	2.74089	1.8079	3.52864	5.22607
AGAP009593	Carboxypeptidase	2297.18	10.7335	372.939	2478.42
AGAP006209	Carboxypeptidase	965.948	7.69241	167.551	1004.19
AGAP007505	Carboxypeptidase	23.3433	94.9163	46.2003	6.97548
AGAP001026	Carboxypeptidase	9.28013	11.3927	13.1485	8.28836
AGAP013181	Carboxypeptidase	93.0701	57.2327	104.577	79.7987
AGAP029692	Carboxypeptidase	6080.94	35.2108	1288.64	7057.03
AGAP011442	Carboxypeptidase	741.112	4.3769	180.377	869.938
AGAP005434	Carboxypeptidase	2.41459	9.43067	8.22938	0.939279
AGAP011435	Carboxypeptidase	27.94	0.0680852	5.8466	34.7959
AGAP000994	Carboxypeptidase	5.28952	1.98233	1.89157	1.95074
AGAP001240	Carboxypeptidase	755.306	6.50579	98.7498	979.486
AGAP001341	Cysteine peptidase	88.366	39.475	68.7923	94.4206
AGAP004533	Cysteine peptidase	450.73	223.249	360.904	493.457
AGAP012900	Cysteine peptidase	2.767	5.20844	2.12515	0.487849
AGAP002879	Cysteine peptidase	42.3965	73.5878	46.9049	24.1761
AGAP000829	Cysteine peptidase	12.6784	12.622	13.2791	14.2513
AGAP012066	Cysteine peptidase	8.53309	8.87836	5.18827	7.60109
AGAP010834	Cysteine peptidase	13.2921	4.03291	6.8065	12.1573
AGAP011828	Cysteine peptidase	1112.73	613.337	981.187	1441.96
AGAP011975	Cysteine peptidase	20.5207	17.6649	16.9647	18.6421
AGAP005020	Cysteine peptidase	5.35605	3.0964	3.09269	5.25834
AGAP005881	Cysteine peptidase	6.83048	5.64651	6.97665	6.14081
AGAP004775	Dipeptidase	180.026	21.2803	68.0953	248.16
AGAP007619	Dipeptidase	460.364	143.091	251.343	575.481
AGAP011654	Dipeptidase	199.214	4.01222	3.41099	244.572
AGAP011653	Dipeptidase	88.8895	0.375303	0.900731	108.073
AGAP029268	Dipeptidase	5.89338	5.39837	5.88311	7.50349
AGAP000513	Dipeptidase	372.38	28.297	183.316	456.422
AGAP004394	Dipeptidyl peptidase	43.6235	45.9231	55.2092	38.8287
AGAP008176	Dipeptidyl peptidase	216.335	26.1528	70.876	252.449
AGAP011584	Dipeptidyl peptidase	13.3687	7.58589	8.62202	11.0335
AGAP028646	Dipeptidyl peptidase	67.0545	0.217494	0.77022	0.0698749
AGAP004563	Dipeptidyl peptidase	490.023	3.4627	44.8559	603.264
AGAP028564	Other peptidase	18.8365	10.7416	40.7154	8.42938
AGAP011098	Other peptidase	7.55573	0.159422	0.294497	7.77095
AGAP003277	Other peptidase	1046.14	653.317	988.888	1098.77
AGAP029563	Other peptidase	9.15415	4.60496	7.59597	7.52492
AGAP000252	Other peptidase	16.0179	6.67274	13.1848	17.5974
AGAP001791	Other peptidase	51.2299	29.0815	43.9758	34.5727
AGAP010764	Other peptidase	506.614	31.4056	297.935	643.736
AGAP007676	Other peptidase	11.5209	0.079711	0.659722	12.6388
AGAP004747	Other peptidase	15.5148	11.0094	18.4631	18.2295
AGAP006144	Other peptidase	1.0888	6.19865	5.92589	0.207074
AGAP009791	Other peptidase	2.70067	4.06706	6.54257	1.12946
AGAP007796	Other peptidase	5.26349	5.68765	2.52247	2.99113
AGAP003106	Other peptidase	23.8865	10.3107	9.92021	27.4716
AGAP006670	Other peptidase	65.3176	59.5159	53.0141	60.6562
AGAP006964	Other peptidase	3.57963	3.19358	5.15681	3.64868
AGAP004086	Other peptidase	13.2263	6.7366	8.73403	11.9869
AGAP004470	Other peptidase	5.4343	3.00251	4.24387	7.16408
AGAP012946	Serine endopeptidase, no CLIP	125.715	15.6154	17.4456	161.756
AGAP010240	Serine endopeptidase, no CLIP	70.9786	302.24	287.86	20.8943
AGAP005065	Serine endopeptidase, no CLIP	465.41	4.07928	46.0193	755.687
AGAP006416	Serine endopeptidase, no CLIP	638.994	3477.02	2412.5	6.95159
AGAP009172	Serine endopeptidase, no CLIP	9.58042	5.18471	8.18821	9.01961
AGAP005054	Serine endopeptidase, no CLIP	4.88814	3.2981	4.078	5.58222
AGAP007165	Serine endopeptidase, no CLIP	412.883	594.215	2451.65	129.474
AGAP006385	Serine endopeptidase, no CLIP	5240.89	24.2286	452.367	5924.15
AGAP006120	Serine endopeptidase, no CLIP	8.37196	7.40697	11.3231	3.4401
AGAP004900	Serine endopeptidase, no CLIP	447.705	2.74494	31.3227	611.859
AGAP006707	Serine endopeptidase, no CLIP	504.87	7.45297	40.4352	781.742
AGAP006709	Serine endopeptidase, no CLIP	1166.38	5.84814	12.5928	1538.95
AGAP006710	Serine endopeptidase, no CLIP	5239.14	24.6902	111.199	5734.99
AGAP006711	Serine endopeptidase, no CLIP	3264.42	13.1891	80.0571	3198.58
AGAP007142	Serine endopeptidase, no CLIP	167.924	9.25075	13.9048	216.552
AGAP009121	Serine endopeptidase, no CLIP	16.4601	6.04877	52.6257	10.5799
AGAP009122	Serine endopeptidase, no CLIP	371.267	1.1782	6.09805	412.806
AGAP011477	Serine endopeptidase, no CLIP	15.151	149.13	7.42974	0.348099
AGAP001707	Serine endopeptidase, no CLIP	6.78541	23.2256	6.23033	3.20458
AGAP001190	Serine endopeptidase, no CLIP	42.6546	0.565847	2.05177	47.5127
AGAP001198	Serine endopeptidase, no CLIP	893.942	16.2575	204.992	954.73
AGAP001199	Serine endopeptidase, no CLIP	19230.6	121.912	1172.51	21631.8
AGAP008290	Serine endopeptidase, no CLIP	36.8601	7.52887	145.538	24.1474
AGAP008291	Serine endopeptidase, no CLIP	57.3308	0.159422	2.43638	51.3756
AGAP008292	Serine endopeptidase, no CLIP	18368.2	95.7351	861.937	22766.1
AGAP008293	Serine endopeptidase, no CLIP	409.164	2.22717	16.2069	411.34
AGAP008294	Serine endopeptidase, no CLIP	5348.95	24.3436	170.701	6105.15
AGAP008295	Serine endopeptidase, no CLIP	342.953	1.96349	20.2121	428.592
AGAP008296	Serine endopeptidase, no CLIP	37138.5	380.757	13370.2	44266.8
AGAP009828	Serine endopeptidase, no CLIP	272.169	784.533	1767.53	8.5705
AGAP010243	Serine endopeptidase, no CLIP	6.80144	0.771716	11.109	8.6994
AGAP011590	Serine endopeptidase, no CLIP	495.694	131.736	303.759	601.269
AGAP012842	Serine endopeptidase, no CLIP	33.034	0.079711	2.41449	40.7048
AGAP001366	Serine endopeptidase, no CLIP	6.83853	10.8448	0.0702266	0.138474
AGAP029132	Serine endopeptidase, no CLIP	9.76605	8.76147	0.0806703	0
AGAP007262	Serine endopeptidase, no CLIP	6.79931	0.188458	3.71328	7.72465
AGAP005706	Serine endopeptidase, no CLIP	89.039	0.907886	9.52038	101.839
AGAP008861	Serine endopeptidase, no CLIP	15559.5	151.031	27795.8	15130.1
AGAP005705	Serine endopeptidase, no CLIP	31.2146	0.163121	0.596291	37.0826

## Sheet: Amino Acid Transporters
Gene ID	Putative function	Whole Gut	Prov	Ant	Post
AGAP009443	Amino acid transporter	38.4096	64.132	105.069	19.7556
AGAP001870	Amino acid transporter	21.408	4.3675	3.77544	6.47225
AGAP028613	Amino acid transporter	68.5745	0.976445	8.47832	80.4584
AGAP010563	Amino acid transporter	49.7979	25.8695	40.1767	43.6582
AGAP012643	Amino acid transporter	10.2227	7.66298	6.91295	14.8938
AGAP007633	Amino acid transporter	337.383	276.445	288.073	416.626
AGAP029720	Amino acid transporter	78.8494	3.65594	9.38559	78.9469
AGAP029719	Amino acid transporter	35.5162	0.812378	4.45832	42.7296
AGAP009897	Amino acid transporter	63.5128	246.235	211.952	28.4189
AGAP000540	Amino acid transporter	1.90052	8.25261	5.96479	0.786466
AGAP002099	Amino acid transporter	14.8258	10.5513	14.7329	13.844
AGAP001923	Amino acid transporter	17.8351	22.3766	24.1309	9.2497
AGAP000586	Amino acid transporter	376.634	39.9592	74.3231	500.257
AGAP000022	Amino acid transporter	134.198	99.3159	105.969	144.534
AGAP005653	Amino acid transporter	19.8796	13.5648	9.61879	15.1842
AGAP004115	Cystine transporter	37.453	5.02515	6.32318	53.5424
AGAP004116	Cystine transporter	11.459	3.62487	6.9079	13.75
