# Supplementary material for: A transcriptomic atlas of Aedes aegypti reveals detailed functional organization of major body parts and gut regional specializations in sugar-fed and blood-fed adult females
Source: eLife. 2022 Apr 26;11:e76132. doi: 10.7554/eLife.76132 (PMC9113746; doi:10.7554/eLife.76132)
Supplement: Supplementary file 8. [file elife-76132-supp8.xlsx]

## Sheet: Sheet1
Orthogroup	Aaeg	Agam	Total	Aaeg	Agam
OG0000000	94	8	102	AAEL000501, AAEL000517, AAEL003673, AAEL003689, AAEL003846, AAEL013709, AAEL020032, AAEL020145, AAEL020216, AAEL020506, AAEL020517, AAEL020565, AAEL020831, AAEL020914, AAEL020976, AAEL021058, AAEL021350, AAEL021405, AAEL021516, AAEL021529, AAEL021540, AAEL021577, AAEL021604, AAEL021628, AAEL021922, AAEL021956, AAEL022175, AAEL022193, AAEL022207, AAEL022254, AAEL022403, AAEL022513, AAEL022583, AAE…	AGAP003909, AGAP005023, AGAP005026, AGAP010724, AGAP012558, AGAP012574, AGAP012586, AGAP012885
OG0000001	78	2	80	AAEL007005, AAEL020050, AAEL020066, AAEL020249, AAEL020309, AAEL020348, AAEL020605, AAEL020675, AAEL020887, AAEL021053, AAEL021158, AAEL021193, AAEL021347, AAEL021459, AAEL021518, AAEL021635, AAEL021638, AAEL021644, AAEL021778, AAEL022062, AAEL022071, AAEL022197, AAEL022584, AAEL022643, AAEL022701, AAEL022702, AAEL022745, AAEL022751, AAEL022752, AAEL022755, AAEL022789, AAEL022814, AAEL022843, AAE…	AGAP012711, AGAP012895
OG0000002	76	0	76	AAEL018018, AAEL020211, AAEL020343, AAEL020395, AAEL020420, AAEL020514, AAEL020600, AAEL020713, AAEL020730, AAEL020772, AAEL020911, AAEL020912, AAEL020951, AAEL021271, AAEL021448, AAEL021472, AAEL021537, AAEL021707, AAEL021726, AAEL021937, AAEL022047, AAEL022210, AAEL022311, AAEL022323, AAEL022412, AAEL022528, AAEL022644, AAEL022883, AAEL023138, AAEL023154, AAEL023340, AAEL023688, AAEL023726, AAE…
OG0000003	64	6	70	AAEL000492, AAEL003685, AAEL012072, AAEL019635, AAEL020107, AAEL020370, AAEL020629, AAEL020755, AAEL020763, AAEL020810, AAEL020985, AAEL021038, AAEL021049, AAEL021112, AAEL021142, AAEL021161, AAEL021182, AAEL021205, AAEL021327, AAEL021601, AAEL021754, AAEL021821, AAEL021903, AAEL021946, AAEL022066, AAEL022201, AAEL022217, AAEL022362, AAEL022518, AAEL022571, AAEL022667, AAEL022670, AAEL022808, AAE…	AGAP003910, AGAP005024, AGAP005025, AGAP012559, AGAP012572, AGAP012573
OG0000004	0	65	65		AGAP000164, AGAP010684, AGAP011181, AGAP011403, AGAP011404, AGAP011405, AGAP011409, AGAP012027, AGAP012546, AGAP012594, AGAP012602, AGAP012619, AGAP012704, AGAP012719, AGAP012722, AGAP012741, AGAP012742, AGAP012753, AGAP012767, AGAP012768, AGAP012816, AGAP012832, AGAP012834, AGAP012835, AGAP012918, AGAP012919, AGAP027985, AGAP028040, AGAP028107, AGAP028159, AGAP028520, AGAP028587, AGAP028589, AGA…
OG0000005	57	7	64	AAEL001315, AAEL001591, AAEL001934, AAEL002120, AAEL002388, AAEL002849, AAEL002863, AAEL003657, AAEL003677, AAEL003679, AAEL003690, AAEL003692, AAEL003700, AAEL003815, AAEL004940, AAEL004950, AAEL005020, AAEL005029, AAEL005031, AAEL007445, AAEL007446, AAEL007564, AAEL008839, AAEL010492, AAEL010494, AAEL010498, AAEL010635, AAEL010637, AAEL011707, AAEL012392, AAEL013682, AAEL014289, AAEL014291, AAE…	AGAP007804, AGAP009068, AGAP009337, AGAP009339, AGAP010751, AGAP013753, AGAP028174
OG0000006	52	4	56	AAEL000753, AAEL001008, AAEL002258, AAEL002279, AAEL002453, AAEL002514, AAEL002531, AAEL008524, AAEL008533, AAEL008535, AAEL008536, AAEL008538, AAEL008539, AAEL008540, AAEL008545, AAEL008547, AAEL008551, AAEL009499, AAEL009502, AAEL009511, AAEL010332, AAEL011858, AAEL011868, AAEL012047, AAEL013547, AAEL013548, AAEL013549, AAEL013550, AAEL013552, AAEL013553, AAEL013557, AAEL013558, AAEL013562, AAE…	AGAP000196, AGAP005348, AGAP005938, AGAP029554
OG0000007	53	1	54	AAEL000157, AAEL005377, AAEL017283, AAEL018022, AAEL019736, AAEL019803, AAEL019897, AAEL020919, AAEL020959, AAEL021144, AAEL021215, AAEL021237, AAEL021477, AAEL021689, AAEL021815, AAEL021875, AAEL021928, AAEL022034, AAEL022317, AAEL022378, AAEL022558, AAEL022870, AAEL023034, AAEL023106, AAEL023120, AAEL023167, AAEL023311, AAEL023440, AAEL023612, AAEL023725, AAEL023780, AAEL023971, AAEL024129, AAE…	AGAP001462
OG0000008	0	48	48		AGAP004913, AGAP004941, AGAP005667, AGAP005668, AGAP007090, AGAP007442, AGAP007443, AGAP007445, AGAP007446, AGAP007451, AGAP007453, AGAP007461, AGAP007462, AGAP007463, AGAP007464, AGAP007465, AGAP007466, AGAP007467, AGAP007468, AGAP007469, AGAP007470, AGAP007471, AGAP008170, AGAP008173, AGAP009228, AGAP010804, AGAP010809, AGAP010847, AGAP011649, AGAP012384, AGAP012442, AGAP012584, AGAP013278, AGA…
OG0000009	0	39	39		AGAP010990, AGAP010991, AGAP010992, AGAP010993, AGAP010994, AGAP010995, AGAP010996, AGAP010997, AGAP010998, AGAP010999, AGAP011000, AGAP011001, AGAP011002, AGAP011003, AGAP011004, AGAP011005, AGAP011006, AGAP011007, AGAP011008, AGAP011009, AGAP011010, AGAP011011, AGAP011012, AGAP011013, AGAP011014, AGAP011015, AGAP011016, AGAP011017, AGAP011018, AGAP011019, AGAP011020, AGAP011021, AGAP011022, AGA…
OG0000010	35	3	38	AAEL001077, AAEL001084, AAEL002254, AAEL002276, AAEL002686, AAEL003233, AAEL005748, AAEL006434, AAEL007102, AAEL007106, AAEL007109, AAEL008501, AAEL010773, AAEL011375, AAEL011621, AAEL011622, AAEL013140, AAEL013432, AAEL014595, AAEL014938, AAEL015527, AAEL015533, AAEL018109, AAEL019633, AAEL019953, AAEL019963, AAEL020743, AAEL020865, AAEL021257, AAEL022544, AAEL023125, AAEL024357, AAEL024784, AAE…	AGAP007043, AGAP007795, AGAP029132
OG0000011	34	2	36	AAEL001545, AAEL001551, AAEL001595, AAEL004444, AAEL005074, AAEL007970, AAEL007974, AAEL007977, AAEL007981, AAEL008602, AAEL011060, AAEL011354, AAEL013993, AAEL013996, AAEL018169, AAEL019664, AAEL020082, AAEL020637, AAEL021629, AAEL022218, AAEL023057, AAEL023825, AAEL024200, AAEL024367, AAEL024902, AAEL025585, AAEL026130, AAEL026156, AAEL026516, AAEL026701, AAEL027341, AAEL027551, AAEL027621, AAE…	AGAP007389, AGAP009764
OG0000012	36	0	36	AAEL011409, AAEL013563, AAEL013893, AAEL014197, AAEL016966, AAEL016983, AAEL017000, AAEL017009, AAEL017050, AAEL017104, AAEL017123, AAEL017149, AAEL017201, AAEL017219, AAEL017236, AAEL017246, AAEL017296, AAEL017316, AAEL017347, AAEL017361, AAEL017377, AAEL017427, AAEL017495, AAEL017505, AAEL017537, AAEL018070, AAEL018107, AAEL019984, AAEL022439, AAEL023017, AAEL024663, AAEL025139, AAEL025413, AAE…
OG0000013	0	35	35		AGAP006790, AGAP007041, AGAP009184, AGAP010022, AGAP010759, AGAP010760, AGAP010761, AGAP010763, AGAP010771, AGAP010772, AGAP010773, AGAP010774, AGAP010775, AGAP010811, AGAP010869, AGAP011197, AGAP011223, AGAP011224, AGAP011225, AGAP011226, AGAP011228, AGAP011230, AGAP011231, AGAP011276, AGAP011277, AGAP012539, AGAP012916, AGAP029314, AGAP029319, AGAP029325, AGAP029326, AGAP029721, AGAP029722, AGA…
OG0000014	31	1	32	AAEL002641, AAEL006548, AAEL006556, AAEL017985, AAEL020425, AAEL020672, AAEL021075, AAEL022121, AAEL023841, AAEL023915, AAEL024190, AAEL024635, AAEL024820, AAEL024964, AAEL025003, AAEL025185, AAEL025462, AAEL025655, AAEL025752, AAEL025884, AAEL025968, AAEL026020, AAEL026605, AAEL026848, AAEL026899, AAEL026977, AAEL027477, AAEL027837, AAEL027906, AAEL027957, AAEL028032	AGAP006039
OG0000015	32	0	32	AAEL008889, AAEL009018, AAEL009117, AAEL009121, AAEL009122, AAEL009123, AAEL009124, AAEL009125, AAEL009126, AAEL009127, AAEL009128, AAEL009129, AAEL009130, AAEL009131, AAEL009132, AAEL009133, AAEL009137, AAEL009138, AAEL009656, AAEL010151, AAEL010158, AAEL014678, AAEL014684, AAEL014890, AAEL014891, AAEL014893, AAEL014924, AAEL017061, AAEL017297, AAEL017539, AAEL017556, AAEL025850
OG0000016	0	31	31		AGAP008403, AGAP009249, AGAP009251, AGAP009252, AGAP010530, AGAP010545, AGAP011040, AGAP011719, AGAP012020, AGAP012021, AGAP012022, AGAP012502, AGAP012504, AGAP012505, AGAP027981, AGAP028069, AGAP028075, AGAP028102, AGAP028179, AGAP028183, AGAP028229, AGAP028641, AGAP028728, AGAP029073, AGAP029074, AGAP029077, AGAP029093, AGAP029100, AGAP029124, AGAP029126, AGAP029264
OG0000017	29	0	29	AAEL000979, AAEL001001, AAEL013921, AAEL020124, AAEL020735, AAEL021047, AAEL021164, AAEL021260, AAEL021378, AAEL021512, AAEL021514, AAEL021745, AAEL022298, AAEL023201, AAEL024050, AAEL024061, AAEL024087, AAEL024232, AAEL024624, AAEL025461, AAEL025942, AAEL026041, AAEL026940, AAEL027309, AAEL027373, AAEL027582, AAEL027714, AAEL027930, AAEL028018
OG0000018	24	4	28	AAEL001984, AAEL005053, AAEL006864, AAEL007896, AAEL008860, AAEL010173, AAEL010847, AAEL011807, AAEL012229, AAEL013014, AAEL013471, AAEL013626, AAEL018129, AAEL019663, AAEL019889, AAEL019890, AAEL019891, AAEL020031, AAEL022330, AAEL022666, AAEL023386, AAEL023483, AAEL025336, AAEL027350	AGAP008795, AGAP008796, AGAP009069, AGAP028220
OG0000019	0	27	27		AGAP002432, AGAP005587, AGAP005591, AGAP005592, AGAP005593, AGAP005594, AGAP005596, AGAP005597, AGAP005598, AGAP005663, AGAP005664, AGAP005665, AGAP005669, AGAP005670, AGAP005671, AGAP005686, AGAP005687, AGAP005688, AGAP005689, AGAP005690, AGAP005691, AGAP006673, AGAP006674, AGAP006675, AGAP007251, AGAP007262, AGAP012736
OG0000020	26	0	26	AAEL020324, AAEL020373, AAEL021999, AAEL022037, AAEL022659, AAEL022758, AAEL022852, AAEL023285, AAEL023574, AAEL023888, AAEL023986, AAEL024167, AAEL024462, AAEL024699, AAEL025634, AAEL025988, AAEL026518, AAEL027158, AAEL027433, AAEL027435, AAEL027531, AAEL027656, AAEL027748, AAEL027812, AAEL027813, AAEL027850
OG0000021	0	26	26		AGAP001247, AGAP001248, AGAP001250, AGAP006869, AGAP010015, AGAP010614, AGAP010615, AGAP010617, AGAP010618, AGAP010619, AGAP010620, AGAP010661, AGAP010663, AGAP012470, AGAP012472, AGAP012473, AGAP012492, AGAP012566, AGAP012670, AGAP012671, AGAP012692, AGAP028704, AGAP028705, AGAP029095, AGAP029192, AGAP029193
OG0000022	25	0	25	AAEL000283, AAEL000533, AAEL000543, AAEL000556, AAEL000563, AAEL002524, AAEL005482, AAEL005641, AAEL009209, AAEL011079, AAEL011404, AAEL011407, AAEL011408, AAEL011453, AAEL011455, AAEL012353, AAEL022823, AAEL023353, AAEL025802, AAEL027215, AAEL027443, AAEL029020, AAEL029039, AAEL029053, AAEL029058
OG0000023	0	25	25		AGAP007187, AGAP007188, AGAP007189, AGAP007190, AGAP007191, AGAP007192, AGAP007193, AGAP007194, AGAP007195, AGAP007196, AGAP007223, AGAP007224, AGAP007225, AGAP007226, AGAP007227, AGAP007228, AGAP007229, AGAP007230, AGAP007231, AGAP007232, AGAP007233, AGAP007234, AGAP007235, AGAP007236, AGAP029347
OG0000024	1	23	24	AAEL003337	AGAP007263, AGAP007269, AGAP007270, AGAP007271, AGAP007272, AGAP007273, AGAP007274, AGAP007275, AGAP007276, AGAP008138, AGAP008139, AGAP008140, AGAP013711, AGAP013729, AGAP013752, AGAP013769, AGAP028465, AGAP028546, AGAP028548, AGAP028549, AGAP028558, AGAP028581, AGAP028582
OG0000025	0	24	24		AGAP000105, AGAP000408, AGAP002950, AGAP003624, AGAP006404, AGAP007602, AGAP007639, AGAP008410, AGAP011660, AGAP012454, AGAP012468, AGAP012486, AGAP012490, AGAP012506, AGAP012538, AGAP012782, AGAP013000, AGAP028577, AGAP029261, AGAP029344, AGAP029348, AGAP029433, AGAP029795, AGAP029799
OG0000026	0	24	24		AGAP000411, AGAP001924, AGAP003960, AGAP008558, AGAP008808, AGAP008911, AGAP012270, AGAP012749, AGAP012777, AGAP012817, AGAP012827, AGAP013252, AGAP013452, AGAP028071, AGAP028710, AGAP028711, AGAP029067, AGAP029108, AGAP029111, AGAP029114, AGAP029119, AGAP029120, AGAP029330, AGAP029794
OG0000027	23	0	23	AAEL000320, AAEL000326, AAEL000338, AAEL000357, AAEL005695, AAEL005696, AAEL005700, AAEL005771, AAEL005775, AAEL005788, AAEL006044, AAEL006058, AAEL006257, AAEL012761, AAEL017136, AAEL017215, AAEL018028, AAEL019659, AAEL019910, AAEL019911, AAEL020266, AAEL023949, AAEL024573
OG0000028	23	0	23	AAEL002633, AAEL002638, AAEL003748, AAEL006784, AAEL006795, AAEL006805, AAEL006815, AAEL014603, AAEL014604, AAEL014605, AAEL014609, AAEL014610, AAEL014613, AAEL014614, AAEL014615, AAEL014617, AAEL014618, AAEL014619, AAEL017366, AAEL019504, AAEL019603, AAEL028635, AAEL029064
OG0000029	1	21	22	AAEL007786	AGAP013242, AGAP013436, AGAP029135, AGAP029140, AGAP029141, AGAP029145, AGAP029155, AGAP029177, AGAP029178, AGAP029183, AGAP029184, AGAP029207, AGAP029208, AGAP029212, AGAP029215, AGAP029216, AGAP029217, AGAP029220, AGAP029222, AGAP029225, AGAP029230
OG0000030	21	0	21	AAEL008966, AAEL008971, AAEL008975, AAEL008977, AAEL008978, AAEL008979, AAEL008984, AAEL008989, AAEL008993, AAEL008995, AAEL009000, AAEL009004, AAEL009007, AAEL014769, AAEL014770, AAEL015280, AAEL021691, AAEL022679, AAEL024338, AAEL027622, AAEL029011
OG0000031	0	21	21		AGAP000782, AGAP001067, AGAP005106, AGAP005307, AGAP005474, AGAP005475, AGAP005476, AGAP005477, AGAP005478, AGAP006696, AGAP006927, AGAP006928, AGAP006929, AGAP028444, AGAP028576, AGAP029069, AGAP029359, AGAP029362, AGAP029373, AGAP029374, AGAP029434
OG0000032	19	1	20	AAEL001717, AAEL003146, AAEL003635, AAEL008420, AAEL020027, AAEL020227, AAEL020334, AAEL020468, AAEL020505, AAEL020649, AAEL021704, AAEL021715, AAEL022099, AAEL022786, AAEL024595, AAEL024944, AAEL027801, AAEL027958, AAEL028157	AGAP008271
OG0000033	18	2	20	AAEL001811, AAEL002057, AAEL002159, AAEL002285, AAEL002454, AAEL005838, AAEL007456, AAEL007461, AAEL007464, AAEL007468, AAEL008435, AAEL010302, AAEL010303, AAEL010323, AAEL012465, AAEL015003, AAEL024714, AAEL027921	AGAP004580, AGAP008722
OG0000034	1	19	20	AAEL010055	AGAP008956, AGAP008958, AGAP027990, AGAP028020, AGAP028033, AGAP028063, AGAP028070, AGAP028082, AGAP028092, AGAP028117, AGAP028118, AGAP028134, AGAP028150, AGAP028155, AGAP028165, AGAP028172, AGAP028181, AGAP028195, AGAP028226
OG0000035	20	0	20	AAEL012477, AAEL018005, AAEL018047, AAEL020545, AAEL020762, AAEL021374, AAEL022185, AAEL022469, AAEL022664, AAEL023264, AAEL023550, AAEL023871, AAEL024340, AAEL024352, AAEL025777, AAEL025919, AAEL026324, AAEL026850, AAEL026872, AAEL027321
OG0000036	20	0	20	AAEL020009, AAEL020024, AAEL020072, AAEL020149, AAEL020392, AAEL020461, AAEL021911, AAEL022061, AAEL022094, AAEL022676, AAEL023263, AAEL023710, AAEL024940, AAEL025609, AAEL025713, AAEL025920, AAEL026194, AAEL027229, AAEL027581, AAEL027831
OG0000037	20	0	20	AAEL020099, AAEL021337, AAEL021580, AAEL022052, AAEL022984, AAEL023830, AAEL023964, AAEL024218, AAEL024370, AAEL025113, AAEL025194, AAEL025654, AAEL025699, AAEL025715, AAEL026180, AAEL026471, AAEL026657, AAEL027315, AAEL027668, AAEL027856
OG0000038	0	20	20		AGAP000806, AGAP002005, AGAP004916, AGAP004917, AGAP004918, AGAP004996, AGAP004997, AGAP004998, AGAP004999, AGAP005848, AGAP006743, AGAP006914, AGAP009556, AGAP009728, AGAP010531, AGAP012000, AGAP012446, AGAP012650, AGAP012651, AGAP028439
OG0000039	0	20	20		AGAP009111, AGAP009390, AGAP009391, AGAP009392, AGAP009393, AGAP009394, AGAP009395, AGAP009396, AGAP009397, AGAP009398, AGAP009408, AGAP009409, AGAP009410, AGAP009411, AGAP011467, AGAP011468, AGAP011469, AGAP012854, AGAP029499, AGAP029705
OG0000040	19	0	19	AAEL001967, AAEL001980, AAEL001987, AAEL001988, AAEL001991, AAEL001993, AAEL001995, AAEL001999, AAEL002001, AAEL002004, AAEL002007, AAEL002015, AAEL002017, AAEL002021, AAEL002024, AAEL002029, AAEL002035, AAEL002038, AAEL002041
OG0000041	16	3	19	AAEL002658, AAEL002666, AAEL002668, AAEL002669, AAEL002670, AAEL002680, AAEL002929, AAEL002940, AAEL006823, AAEL010853, AAEL010858, AAEL012430, AAEL012431, AAEL013611, AAEL024339, AAEL024868	AGAP000154, AGAP000907, AGAP005907
OG0000042	2	17	19	AAEL008895, AAEL020281	AGAP010741, AGAP012562, AGAP013050, AGAP013086, AGAP013110, AGAP013113, AGAP013225, AGAP013247, AGAP013264, AGAP013316, AGAP013322, AGAP013353, AGAP013369, AGAP013448, AGAP013456, AGAP013484, AGAP013517
OG0000043	13	6	19	AAEL017349, AAEL017975, AAEL017976, AAEL018061, AAEL019403, AAEL020330, AAEL020571, AAEL023321, AAEL024802, AAEL025647, AAEL026215, AAEL026446, AAEL027610	AGAP002076, AGAP004192, AGAP004582, AGAP004583, AGAP004944, AGAP012891
OG0000044	0	19	19		AGAP003594, AGAP004575, AGAP004651, AGAP005473, AGAP005479, AGAP005480, AGAP005481, AGAP005482, AGAP005483, AGAP005484, AGAP005485, AGAP006272, AGAP006930, AGAP008235, AGAP008971, AGAP009656, AGAP027988, AGAP029404, AGAP029699
OG0000045	17	1	18	AAEL001688, AAEL019971, AAEL020275, AAEL021381, AAEL021500, AAEL022604, AAEL022753, AAEL023189, AAEL023663, AAEL025370, AAEL025545, AAEL025761, AAEL025767, AAEL026648, AAEL026887, AAEL027247, AAEL027488	AGAP001085
OG0000046	15	3	18	AAEL003181, AAEL003187, AAEL003195, AAEL003196, AAEL003198, AAEL003201, AAEL008757, AAEL020734, AAEL021498, AAEL022449, AAEL023346, AAEL024002, AAEL026083, AAEL026956, AAEL028198	AGAP001722, AGAP001723, AGAP002863
OG0000047	0	18	18		AGAP000216, AGAP005253, AGAP009448, AGAP009449, AGAP010931, AGAP011232, AGAP011233, AGAP011234, AGAP011238, AGAP011267, AGAP011270, AGAP011835, AGAP012638, AGAP028622, AGAP029734, AGAP029735, AGAP029736, AGAP029737
OG0000048	15	2	17	AAEL000462, AAEL003329, AAEL003340, AAEL003341, AAEL003353, AAEL015149, AAEL015150, AAEL018101, AAEL020546, AAEL022854, AAEL025794, AAEL026303, AAEL027230, AAEL027719, AAEL028238	AGAP000714, AGAP013409
OG0000049	17	0	17	AAEL000534, AAEL000547, AAEL000552, AAEL000863, AAEL000873, AAEL000926, AAEL004091, AAEL008053, AAEL010995, AAEL011002, AAEL011005, AAEL014228, AAEL014230, AAEL019675, AAEL019676, AAEL026145, AAEL026983
OG0000050	16	1	17	AAEL001555, AAEL002643, AAEL003356, AAEL005132, AAEL007545, AAEL010261, AAEL021101, AAEL021445, AAEL021571, AAEL022223, AAEL023448, AAEL024879, AAEL024896, AAEL026827, AAEL026925, AAEL028142	AGAP029294
OG0000051	17	0	17	AAEL002353, AAEL008117, AAEL014668, AAEL019999, AAEL020000, AAEL021310, AAEL021467, AAEL023367, AAEL023728, AAEL024231, AAEL024749, AAEL024777, AAEL024838, AAEL025085, AAEL026630, AAEL027188, AAEL027338
OG0000052	12	5	17	AAEL002367, AAEL002378, AAEL002385, AAEL002391, AAEL004341, AAEL005113, AAEL005123, AAEL017553, AAEL019678, AAEL019679, AAEL023844, AAEL024216	AGAP006724, AGAP006725, AGAP006726, AGAP006727, AGAP006728
OG0000053	0	17	17		AGAP002864, AGAP002865, AGAP002866, AGAP002867, AGAP002868, AGAP002869, AGAP002870, AGAP008205, AGAP008206, AGAP008207, AGAP008208, AGAP008209, AGAP008212, AGAP008213, AGAP008214, AGAP011028, AGAP011029
OG0000054	0	17	17		AGAP005677, AGAP005678, AGAP005679, AGAP029136, AGAP029137, AGAP029142, AGAP029158, AGAP029170, AGAP029171, AGAP029174, AGAP029209, AGAP029213, AGAP029223, AGAP029227, AGAP029229, AGAP029232, AGAP029233
OG0000055	13	3	16	AAEL000387, AAEL000650, AAEL000668, AAEL001401, AAEL001402, AAEL001414, AAEL001420, AAEL007224, AAEL007784, AAEL009359, AAEL009792, AAEL012255, AAEL023798	AGAP007454, AGAP007455, AGAP007456
OG0000056	14	2	16	AAEL002739, AAEL002751, AAEL009182, AAEL012020, AAEL013593, AAEL014880, AAEL018286, AAEL021970, AAEL022370, AAEL023147, AAEL025459, AAEL026412, AAEL026491, AAEL027933	AGAP005568, AGAP006129
OG0000057	16	0	16	AAEL003144, AAEL003149, AAEL005005, AAEL008137, AAEL010790, AAEL015124, AAEL015571, AAEL018026, AAEL020442, AAEL022951, AAEL023718, AAEL024818, AAEL025312, AAEL026060, AAEL026257, AAEL028088
OG0000058	9	7	16	AAEL003618, AAEL003619, AAEL003624, AAEL003626, AAEL003627, AAEL003640, AAEL003641, AAEL008424, AAEL018304	AGAP010857, AGAP010860, AGAP010863, AGAP010865, AGAP028615, AGAP029307, AGAP029591
OG0000059	1	15	16	AAEL006385	AGAP000638, AGAP000640, AGAP000641, AGAP000642, AGAP000643, AGAP000644, AGAP005182, AGAP009065, AGAP009402, AGAP010648, AGAP010649, AGAP010650, AGAP011647, AGAP013182, AGAP029660
OG0000060	15	0	15	AAEL000011, AAEL000018, AAEL000027, AAEL000039, AAEL000047, AAEL000063, AAEL000066, AAEL000089, AAEL000095, AAEL011001, AAEL018060, AAEL018358, AAEL021241, AAEL025397, AAEL026162
OG0000061	15	0	15	AAEL002462, AAEL008464, AAEL010863, AAEL019886, AAEL021399, AAEL021697, AAEL022780, AAEL023832, AAEL024275, AAEL024768, AAEL025215, AAEL025832, AAEL027328, AAEL028113, AAEL028184
OG0000062	15	0	15	AAEL003308, AAEL006403, AAEL006414, AAEL006418, AAEL006421, AAEL006429, AAEL006430, AAEL007818, AAEL008079, AAEL008080, AAEL008097, AAEL013623, AAEL013628, AAEL015638, AAEL025114
OG0000063	15	0	15	AAEL009783, AAEL009784, AAEL009788, AAEL009790, AAEL009791, AAEL009793, AAEL009796, AAEL009801, AAEL009802, AAEL009803, AAEL009807, AAEL015163, AAEL015363, AAEL020010, AAEL020011
OG0000064	15	0	15	AAEL010552, AAEL012828, AAEL021283, AAEL021662, AAEL021887, AAEL021897, AAEL022308, AAEL023218, AAEL023858, AAEL024610, AAEL024659, AAEL025406, AAEL025558, AAEL025898, AAEL028146
OG0000065	14	1	15	AAEL012641, AAEL012642, AAEL012645, AAEL012646, AAEL012648, AAEL012649, AAEL012651, AAEL012652, AAEL012653, AAEL015252, AAEL015253, AAEL015254, AAEL025465, AAEL027171	AGAP029283
OG0000066	0	15	15		AGAP004770, AGAP006087, AGAP008276, AGAP008277, AGAP008290, AGAP008291, AGAP008292, AGAP008293, AGAP008294, AGAP008295, AGAP008296, AGAP008861, AGAP012842, AGAP013716, AGAP028218
OG0000067	0	15	15		AGAP012355, AGAP012676, AGAP027991, AGAP028008, AGAP028013, AGAP028016, AGAP028018, AGAP028044, AGAP028067, AGAP028106, AGAP028137, AGAP028156, AGAP028160, AGAP028178, AGAP028208
OG0000068	14	0	14	AAEL001726, AAEL014497, AAEL015526, AAEL018194, AAEL020131, AAEL020164, AAEL020698, AAEL022233, AAEL022625, AAEL023325, AAEL025043, AAEL025235, AAEL025896, AAEL026296
OG0000069	13	1	14	AAEL004939, AAEL020174, AAEL020189, AAEL020774, AAEL020859, AAEL022064, AAEL022211, AAEL023235, AAEL025029, AAEL025222, AAEL025737, AAEL027404, AAEL028208	AGAP004914
OG0000070	12	2	14	AAEL008151, AAEL008153, AAEL008156, AAEL008157, AAEL008165, AAEL008172, AAEL008173, AAEL008180, AAEL008186, AAEL022290, AAEL023000, AAEL026808	AGAP001892, AGAP001893
OG0000071	1	13	14	AAEL008969	AGAP006849, AGAP006850, AGAP006851, AGAP006852, AGAP006853, AGAP006854, AGAP006855, AGAP006856, AGAP006857, AGAP006858, AGAP006859, AGAP006861, AGAP006862
OG0000072	0	14	14		AGAP011071, AGAP011072, AGAP011073, AGAP028506, AGAP028508, AGAP028685, AGAP028687, AGAP028688, AGAP028689, AGAP028690, AGAP029665, AGAP029775, AGAP029789, AGAP029790
OG0000073	0	14	14		AGAP011781, AGAP011783, AGAP011785, AGAP011786, AGAP011787, AGAP011788, AGAP011789, AGAP011790, AGAP011791, AGAP011792, AGAP011793, AGAP011794, AGAP028725, AGAP029335
OG0000074	13	0	13	AAEL000028, AAEL000037, AAEL000099, AAEL005093, AAEL006568, AAEL006576, AAEL006585, AAEL006674, AAEL008378, AAEL014386, AAEL015430, AAEL015432, AAEL026937
OG0000075	2	11	13	AAEL000597, AAEL001196	AGAP009710, AGAP009711, AGAP009714, AGAP009715, AGAP009716, AGAP009717, AGAP009721, AGAP009722, AGAP009723, AGAP028644, AGAP029589
OG0000076	11	2	13	AAEL000603, AAEL008939, AAEL008948, AAEL008957, AAEL012737, AAEL019548, AAEL021319, AAEL022137, AAEL022387, AAEL022572, AAEL024870	AGAP000535, AGAP003499
OG0000077	13	0	13	AAEL000808, AAEL000997, AAEL001267, AAEL009873, AAEL020572, AAEL024388, AAEL024440, AAEL025290, AAEL026552, AAEL026992, AAEL027107, AAEL027252, AAEL028186
OG0000078	13	0	13	AAEL000827, AAEL000833, AAEL000835, AAEL000837, AAEL000846, AAEL003511, AAEL004856, AAEL010872, AAEL010875, AAEL020493, AAEL022697, AAEL024226, AAEL028058
OG0000079	9	4	13	AAEL001130, AAEL006719, AAEL007673, AAEL008451, AAEL008452, AAEL008456, AAEL013421, AAEL026011, AAEL026503	AGAP002317, AGAP002318, AGAP006371, AGAP012230
OG0000080	7	6	13	AAEL007795, AAEL007798, AAEL007807, AAEL007808, AAEL007815, AAEL007816, AAEL010154	AGAP002416, AGAP002417, AGAP002418, AGAP002419, AGAP012957, AGAP013241
OG0000081	1	12	13	AAEL008856	AGAP006192, AGAP006193, AGAP006194, AGAP006195, AGAP006196, AGAP006197, AGAP006198, AGAP006199, AGAP006200, AGAP006201, AGAP006202, AGAP008648
OG0000082	12	1	13	AAEL009165, AAEL009166, AAEL010435, AAEL013118, AAEL013127, AAEL013585, AAEL019469, AAEL019470, AAEL019471, AAEL022600, AAEL026025, AAEL026981	AGAP006187
OG0000083	13	0	13	AAEL020814, AAEL021862, AAEL022694, AAEL023275, AAEL023789, AAEL023811, AAEL024443, AAEL025542, AAEL025681, AAEL025706, AAEL025902, AAEL026755, AAEL026773
OG0000084	0	13	13		AGAP011734, AGAP011735, AGAP011739, AGAP011773, AGAP011774, AGAP013395, AGAP029258, AGAP029270, AGAP029271, AGAP029311, AGAP029312, AGAP029327, AGAP029328
OG0000085	12	0	12	AAEL000252, AAEL002273, AAEL005753, AAEL007969, AAEL010866, AAEL010867, AAEL011624, AAEL020470, AAEL020853, AAEL021678, AAEL029072, AAEL029073
OG0000086	11	1	12	AAEL001290, AAEL001319, AAEL013789, AAEL015119, AAEL021074, AAEL021791, AAEL022556, AAEL022665, AAEL022681, AAEL024797, AAEL027311	AGAP000047
OG0000087	12	0	12	AAEL001714, AAEL004310, AAEL005420, AAEL008409, AAEL009144, AAEL010424, AAEL010987, AAEL019490, AAEL020469, AAEL022199, AAEL026492, AAEL026760
OG0000088	11	1	12	AAEL002187, AAEL002191, AAEL002211, AAEL002223, AAEL002229, AAEL002231, AAEL002233, AAEL002241, AAEL002246, AAEL025678, AAEL027365	AGAP008459
OG0000089	12	0	12	AAEL002288, AAEL002301, AAEL002580, AAEL002585, AAEL002590, AAEL002595, AAEL002600, AAEL002601, AAEL002610, AAEL002624, AAEL002629, AAEL020706
OG0000090	12	0	12	AAEL002855, AAEL014020, AAEL021413, AAEL021430, AAEL021494, AAEL022921, AAEL023938, AAEL024345, AAEL024604, AAEL024609, AAEL025583, AAEL025876
OG0000091	12	0	12	AAEL002925, AAEL002930, AAEL007233, AAEL011053, AAEL011904, AAEL011907, AAEL011911, AAEL015347, AAEL018166, AAEL021120, AAEL021481, AAEL025376
OG0000092	7	5	12	AAEL005621, AAEL005625, AAEL006259, AAEL006484, AAEL006498, AAEL023932, AAEL024685	AGAP001161, AGAP001162, AGAP012982, AGAP012985, AGAP013149
OG0000093	6	6	12	AAEL005918, AAEL012395, AAEL018267, AAEL019847, AAEL025460, AAEL027539	AGAP001775, AGAP001777, AGAP004603, AGAP006427, AGAP012467, AGAP029686
OG0000094	5	7	12	AAEL006327, AAEL007913, AAEL008898, AAEL013972, AAEL013976	AGAP009551, AGAP009552, AGAP009553, AGAP012672, AGAP012673, AGAP012696, AGAP029783
OG0000095	11	1	12	AAEL006679, AAEL006684, AAEL010580, AAEL012580, AAEL019749, AAEL019750, AAEL021830, AAEL022785, AAEL024894, AAEL025034, AAEL027138	AGAP009949
OG0000096	4	8	12	AAEL008201, AAEL012558, AAEL012560, AAEL023643	AGAP005702, AGAP005703, AGAP005704, AGAP005705, AGAP005706, AGAP005707, AGAP005709, AGAP029091
OG0000097	11	1	12	AAEL010406, AAEL020602, AAEL020707, AAEL022143, AAEL022167, AAEL025071, AAEL026291, AAEL026309, AAEL026974, AAEL027059, AAEL027924	AGAP002803
OG0000098	10	2	12	AAEL011761, AAEL011770, AAEL012762, AAEL012765, AAEL012766, AAEL012769, AAEL012770, AAEL012772, AAEL020553, AAEL022568	AGAP001443, AGAP002196
OG0000099	1	11	12	AAEL018094	AGAP006691, AGAP029134, AGAP029150, AGAP029152, AGAP029159, AGAP029160, AGAP029164, AGAP029165, AGAP029182, AGAP029200, AGAP029202
OG0000100	9	3	12	AAEL020121, AAEL022048, AAEL022967, AAEL023043, AAEL025768, AAEL026079, AAEL027428, AAEL028036, AAEL028070	AGAP029336, AGAP029479, AGAP029801
OG0000101	0	12	12		AGAP008451, AGAP008452, AGAP008453, AGAP008456, AGAP008457, AGAP008461, AGAP008462, AGAP008463, AGAP008479, AGAP008480, AGAP028098, AGAP029423
OG0000102	0	12	12		AGAP010112, AGAP010113, AGAP010114, AGAP010116, AGAP010117, AGAP010119, AGAP010120, AGAP010126, AGAP010127, AGAP010128, AGAP012875, AGAP013749
OG0000103	6	5	11	AAEL000101, AAEL000119, AAEL000127, AAEL017443, AAEL017533, AAEL024837	AGAP003481, AGAP003482, AGAP003483, AGAP004655, AGAP013466
OG0000104	10	1	11	AAEL000107, AAEL000122, AAEL008867, AAEL010001, AAEL010006, AAEL010010, AAEL018111, AAEL018296, AAEL021475, AAEL026692	AGAP004083
OG0000105	9	2	11	AAEL001155, AAEL006052, AAEL008210, AAEL012242, AAEL014264, AAEL019969, AAEL021266, AAEL025423, AAEL027947	AGAP001340, AGAP007257
OG0000106	7	4	11	AAEL003956, AAEL003970, AAEL005854, AAEL005855, AAEL019981, AAEL022122, AAEL024941	AGAP010508, AGAP011196, AGAP029719, AGAP029720
OG0000107	6	5	11	AAEL004172, AAEL006179, AAEL006642, AAEL012101, AAEL013229, AAEL026111	AGAP001218, AGAP001219, AGAP003237, AGAP007122, AGAP010971
OG0000108	10	1	11	AAEL005018, AAEL005028, AAEL005033, AAEL005042, AAEL007863, AAEL010110, AAEL021235, AAEL021255, AAEL022457, AAEL023252	AGAP005244
OG0000109	5	6	11	AAEL005407, AAEL005408, AAEL005412, AAEL005417, AAEL005426	AGAP003720, AGAP003721, AGAP003722, AGAP012624, AGAP012625, AGAP012784
OG0000110	11	0	11	AAEL005571, AAEL005582, AAEL005584, AAEL005592, AAEL008276, AAEL013085, AAEL019630, AAEL020104, AAEL020796, AAEL023537, AAEL024259
OG0000111	11	0	11	AAEL006425, AAEL007582, AAEL007601, AAEL010196, AAEL010202, AAEL012852, AAEL013703, AAEL013712, AAEL013715, AAEL023729, AAEL025491
OG0000112	11	0	11	AAEL006906, AAEL021204, AAEL021934, AAEL022389, AAEL023073, AAEL023855, AAEL024241, AAEL026284, AAEL026902, AAEL028125, AAEL028209
OG0000113	1	10	11	AAEL012421	AGAP007203, AGAP007207, AGAP007216, AGAP012065, AGAP029693, AGAP029694, AGAP029695, AGAP029696, AGAP029697, AGAP029698
OG0000114	8	3	11	AAEL014086, AAEL014089, AAEL019760, AAEL023538, AAEL023890, AAEL024757, AAEL025158, AAEL027503	AGAP005466, AGAP007498, AGAP029188
OG0000115	11	0	11	AAEL019962, AAEL021341, AAEL022721, AAEL023024, AAEL023173, AAEL024993, AAEL025100, AAEL026375, AAEL026743, AAEL027463, AAEL027718
OG0000116	10	1	11	AAEL020103, AAEL020105, AAEL020940, AAEL021696, AAEL024036, AAEL024682, AAEL024856, AAEL025052, AAEL025401, AAEL027260	AGAP005932
OG0000117	0	11	11		AGAP002202, AGAP002204, AGAP002205, AGAP002206, AGAP002207, AGAP002208, AGAP002209, AGAP002210, AGAP002211, AGAP002555, AGAP009696
OG0000118	0	11	11		AGAP004676, AGAP004687, AGAP010329, AGAP012438, AGAP012497, AGAP012526, AGAP012542, AGAP012583, AGAP012730, AGAP012912, AGAP029400
OG0000119	0	11	11		AGAP006407, AGAP029149, AGAP029153, AGAP029162, AGAP029201, AGAP029210, AGAP029834, AGAP029835, AGAP029836, AGAP029837, AGAP029838
OG0000120	0	11	11		AGAP008654, AGAP010812, AGAP010813, AGAP010814, AGAP010815, AGAP010816, AGAP010818, AGAP010819, AGAP010830, AGAP010831, AGAP010832
OG0000121	0	11	11		AGAP008891, AGAP011431, AGAP011432, AGAP029065, AGAP029117, AGAP029292, AGAP029324, AGAP029747, AGAP029748, AGAP029749, AGAP029750
OG0000122	10	0	10	AAEL000344, AAEL000377, AAEL001189, AAEL001487, AAEL004516, AAEL009433, AAEL013719, AAEL014876, AAEL022484, AAEL026563
OG0000123	10	0	10	AAEL000396, AAEL002104, AAEL002115, AAEL003008, AAEL007368, AAEL009786, AAEL012038, AAEL015005, AAEL022017, AAEL026241
OG0000124	10	0	10	AAEL001673, AAEL001928, AAEL001951, AAEL004616, AAEL004631, AAEL004646, AAEL005961, AAEL005964, AAEL009451, AAEL011197
OG0000125	7	3	10	AAEL002373, AAEL004242, AAEL012680, AAEL012683, AAEL012685, AAEL012688, AAEL012694	AGAP001552, AGAP012996, AGAP013124
OG0000126	5	5	10	AAEL002467, AAEL002481, AAEL002490, AAEL004798, AAEL015606	AGAP006432, AGAP006795, AGAP006796, AGAP009830, AGAP011063
OG0000127	10	0	10	AAEL002713, AAEL008104, AAEL009384, AAEL010117, AAEL011633, AAEL011634, AAEL019868, AAEL022887, AAEL026153, AAEL028190
OG0000128	8	2	10	AAEL003012, AAEL012774, AAEL012776, AAEL020609, AAEL022651, AAEL022733, AAEL025617, AAEL026458	AGAP004808, AGAP004860
OG0000129	5	5	10	AAEL003951, AAEL003952, AAEL003963, AAEL003965, AAEL003967	AGAP012066, AGAP012067, AGAP012068, AGAP012069, AGAP012907
OG0000130	10	0	10	AAEL005100, AAEL005118, AAEL006285, AAEL007983, AAEL008911, AAEL020598, AAEL021783, AAEL024154, AAEL025054, AAEL026585
OG0000131	1	9	10	AAEL006014	AGAP010734, AGAP010810, AGAP010899, AGAP011216, AGAP013282, AGAP013327, AGAP029167, AGAP029194, AGAP029195
OG0000132	1	9	10	AAEL006871	AGAP002753, AGAP005077, AGAP005104, AGAP005308, AGAP010802, AGAP010803, AGAP011339, AGAP029262, AGAP029447
OG0000133	6	4	10	AAEL007951, AAEL007964, AAEL020409, AAEL023692, AAEL025173, AAEL027003	AGAP009191, AGAP009194, AGAP009195, AGAP009196
OG0000134	10	0	10	AAEL010409, AAEL010415, AAEL010418, AAEL010426, AAEL010428, AAEL015286, AAEL017079, AAEL018080, AAEL023626, AAEL027258
OG0000135	7	3	10	AAEL013190, AAEL013193, AAEL013200, AAEL017488, AAEL019647, AAEL024133, AAEL027709	AGAP001119, AGAP001120, AGAP001121
OG0000136	1	9	10	AAEL013439	AGAP006978, AGAP006979, AGAP006980, AGAP006981, AGAP006982, AGAP006983, AGAP006984, AGAP006985, AGAP006986
OG0000137	1	9	10	AAEL026894	AGAP006689, AGAP006690, AGAP006697, AGAP006712, AGAP006714, AGAP006785, AGAP006870, AGAP008739, AGAP029371
OG0000138	0	10	10		AGAP001088, AGAP003677, AGAP007403, AGAP012431, AGAP012458, AGAP012489, AGAP012766, AGAP028435, AGAP029266, AGAP029291
OG0000139	0	10	10		AGAP003245, AGAP003246, AGAP003247, AGAP003248, AGAP003249, AGAP003250, AGAP009849, AGAP010833, AGAP012037, AGAP013487
OG0000140	0	10	10		AGAP004975, AGAP004976, AGAP004977, AGAP004978, AGAP004979, AGAP004980, AGAP004981, AGAP006258, AGAP012616, AGAP012617
OG0000141	0	10	10		AGAP011103, AGAP011433, AGAP011610, AGAP011611, AGAP012279, AGAP028699, AGAP028700, AGAP028701, AGAP028702, AGAP028703
OG0000142	9	0	9	AAEL000087, AAEL001163, AAEL001794, AAEL008607, AAEL017023, AAEL019958, AAEL019959, AAEL025055, AAEL025334
OG0000143	8	1	9	AAEL000686, AAEL001057, AAEL001096, AAEL002138, AAEL007941, AAEL011528, AAEL020560, AAEL027798	AGAP000687
OG0000144	5	4	9	AAEL000797, AAEL000813, AAEL000820, AAEL000829, AAEL000834	AGAP010398, AGAP010399, AGAP010400, AGAP010401
OG0000145	6	3	9	AAEL000871, AAEL000876, AAEL000882, AAEL000910, AAEL000912, AAEL000928	AGAP010785, AGAP029196, AGAP029197
OG0000146	9	0	9	AAEL001015, AAEL002968, AAEL005000, AAEL006228, AAEL015127, AAEL015128, AAEL021401, AAEL023417, AAEL024098
OG0000147	1	8	9	AAEL001059	AGAP004173, AGAP004380, AGAP004381, AGAP004382, AGAP004383, AGAP012702, AGAP012838, AGAP012839
OG0000148	9	0	9	AAEL001461, AAEL007669, AAEL010671, AAEL010677, AAEL017179, AAEL017302, AAEL017320, AAEL017452, AAEL029052
OG0000149	9	0	9	AAEL002222, AAEL007975, AAEL009487, AAEL020440, AAEL021489, AAEL024380, AAEL024939, AAEL025610, AAEL025814
OG0000150	9	0	9	AAEL002243, AAEL022835, AAEL024023, AAEL024550, AAEL026288, AAEL027299, AAEL027491, AAEL027838, AAEL027885
OG0000151	9	0	9	AAEL002696, AAEL006323, AAEL008162, AAEL008163, AAEL009108, AAEL012778, AAEL019828, AAEL019829, AAEL022247
OG0000152	5	4	9	AAEL002848, AAEL002851, AAEL005052, AAEL005084, AAEL019894	AGAP005293, AGAP008622, AGAP010510, AGAP010929
OG0000153	9	0	9	AAEL002989, AAEL003004, AAEL003016, AAEL003998, AAEL013916, AAEL022145, AAEL024585, AAEL026789, AAEL027953
OG0000154	5	4	9	AAEL003617, AAEL011356, AAEL012455, AAEL012457, AAEL026142	AGAP000287, AGAP000288, AGAP000289, AGAP000414
OG0000155	8	1	9	AAEL004933, AAEL012199, AAEL012340, AAEL012342, AAEL012343, AAEL012349, AAEL015326, AAEL023211	AGAP013368
OG0000156	9	0	9	AAEL006157, AAEL010367, AAEL010370, AAEL010380, AAEL010382, AAEL010384, AAEL017311, AAEL024680, AAEL026787
OG0000157	7	2	9	AAEL006287, AAEL007698, AAEL008098, AAEL013227, AAEL013233, AAEL013692, AAEL021425	AGAP009509, AGAP011204
OG0000158	7	2	9	AAEL006318, AAEL009625, AAEL009628, AAEL009631, AAEL009632, AAEL021589, AAEL021699	AGAP002926, AGAP005167
OG0000159	5	4	9	AAEL008045, AAEL013981, AAEL013983, AAEL013990, AAEL021888	AGAP005768, AGAP010657, AGAP010658, AGAP029203
OG0000160	3	6	9	AAEL011454, AAEL011460, AAEL026740	AGAP005384, AGAP005385, AGAP005386, AGAP005387, AGAP005388, AGAP007353
OG0000161	9	0	9	AAEL011763, AAEL011764, AAEL013492, AAEL013493, AAEL013496, AAEL013501, AAEL015113, AAEL015116, AAEL020579
OG0000162	9	0	9	AAEL020036, AAEL020114, AAEL022553, AAEL023980, AAEL024378, AAEL025005, AAEL025342, AAEL027001, AAEL028031
OG0000163	9	0	9	AAEL020333, AAEL020970, AAEL023142, AAEL023205, AAEL023740, AAEL023801, AAEL024103, AAEL026219, AAEL027214
OG0000164	8	1	9	AAEL020899, AAEL021321, AAEL022776, AAEL022953, AAEL023720, AAEL025308, AAEL025516, AAEL026413	AGAP003894
OG0000165	8	1	9	AAEL021701, AAEL023616, AAEL024662, AAEL024834, AAEL025947, AAEL027079, AAEL027162, AAEL027392	AGAP007154
OG0000166	1	8	9	AAEL023487	AGAP010103, AGAP010104, AGAP010105, AGAP010106, AGAP010107, AGAP010108, AGAP010121, AGAP029247
OG0000167	0	9	9		AGAP000999, AGAP001002, AGAP001004, AGAP010634, AGAP010636, AGAP010637, AGAP010669, AGAP013027, AGAP029166
OG0000168	0	9	9		AGAP003920, AGAP004259, AGAP006701, AGAP007971, AGAP008430, AGAP028103, AGAP028169, AGAP029214, AGAP029428
OG0000169	0	9	9		AGAP005636, AGAP005637, AGAP005638, AGAP006220, AGAP006221, AGAP006224, AGAP006225, AGAP006226, AGAP012569
OG0000170	0	9	9		AGAP008070, AGAP008071, AGAP028593, AGAP028712, AGAP028714, AGAP028715, AGAP028720, AGAP029832, AGAP029833
OG0000171	0	9	9		AGAP008448, AGAP008478, AGAP028047, AGAP028077, AGAP028089, AGAP028113, AGAP028119, AGAP028126, AGAP028191
OG0000172	0	9	9		AGAP009211, AGAP009214, AGAP009215, AGAP009216, AGAP009217, AGAP009218, AGAP009219, AGAP009220, AGAP011325
OG0000173	0	9	9		AGAP012091, AGAP012092, AGAP012173, AGAP028182, AGAP029285, AGAP029308, AGAP029316, AGAP029333, AGAP029334
OG0000174	0	9	9		AGAP012959, AGAP013072, AGAP013098, AGAP013169, AGAP013295, AGAP013325, AGAP013438, AGAP013483, AGAP013531
OG0000175	8	0	8	AAEL000521, AAEL009562, AAEL020723, AAEL022653, AAEL024234, AAEL025060, AAEL025186, AAEL027871
OG0000176	5	3	8	AAEL000642, AAEL000647, AAEL000651, AAEL000678, AAEL003434	AGAP011939, AGAP012399, AGAP012400
OG0000177	8	0	8	AAEL000698, AAEL008511, AAEL011085, AAEL013204, AAEL014180, AAEL014380, AAEL023288, AAEL026841
OG0000178	5	3	8	AAEL000843, AAEL010886, AAEL010893, AAEL010894, AAEL022259	AGAP002359, AGAP002360, AGAP013402
OG0000179	7	1	8	AAEL001098, AAEL003243, AAEL003253, AAEL003279, AAEL017003, AAEL019964, AAEL025028	AGAP004855
OG0000180	7	1	8	AAEL001194, AAEL002228, AAEL002237, AAEL008160, AAEL020799, AAEL022506, AAEL029069	AGAP009176
OG0000181	7	1	8	AAEL001248, AAEL001256, AAEL001258, AAEL001263, AAEL001278, AAEL001286, AAEL014835	AGAP005613
OG0000182	8	0	8	AAEL001350, AAEL004309, AAEL004316, AAEL004318, AAEL009787, AAEL009799, AAEL012018, AAEL022250
OG0000183	3	5	8	AAEL001766, AAEL015018, AAEL015019	AGAP004832, AGAP007048, AGAP007059, AGAP007060, AGAP007061
OG0000184	7	1	8	AAEL001893, AAEL006453, AAEL011427, AAEL012566, AAEL021515, AAEL026858, AAEL028112	AGAP004060
OG0000185	8	0	8	AAEL002189, AAEL002202, AAEL002208, AAEL002239, AAEL002245, AAEL021730, AAEL022045, AAEL029006
OG0000186	7	1	8	AAEL002264, AAEL020119, AAEL022131, AAEL022840, AAEL023094, AAEL024826, AAEL027417	AGAP029361
OG0000187	7	1	8	AAEL002907, AAEL002909, AAEL002915, AAEL019842, AAEL021421, AAEL022479, AAEL022598	AGAP011992
OG0000188	3	5	8	AAEL002959, AAEL002964, AAEL002969	AGAP001863, AGAP013120, AGAP013166, AGAP013260, AGAP013496
OG0000189	7	1	8	AAEL003014, AAEL009727, AAEL010507, AAEL020768, AAEL023391, AAEL026438, AAEL028073	AGAP012987
OG0000190	4	4	8	AAEL003058, AAEL003076, AAEL003091, AAEL026670	AGAP005751, AGAP005752, AGAP005753, AGAP005754
OG0000191	5	3	8	AAEL003079, AAEL005138, AAEL008560, AAEL014371, AAEL021590	AGAP006775, AGAP007990, AGAP010334
OG0000192	5	3	8	AAEL003123, AAEL008857, AAEL008858, AAEL008861, AAEL008876	AGAP004760, AGAP011696, AGAP011698
OG0000193	5	3	8	AAEL004240, AAEL011822, AAEL019957, AAEL021010, AAEL026731	AGAP008915, AGAP010241, AGAP028196
OG0000194	7	1	8	AAEL005245, AAEL011772, AAEL020323, AAEL021133, AAEL021668, AAEL025895, AAEL026871	AGAP003676
OG0000195	6	2	8	AAEL005842, AAEL020288, AAEL020388, AAEL021294, AAEL022335, AAEL022360	AGAP004694, AGAP028434
OG0000196	3	5	8	AAEL006011, AAEL023052, AAEL029067	AGAP007907, AGAP009327, AGAP029157, AGAP029161, AGAP029163
OG0000197	5	3	8	AAEL006276, AAEL014537, AAEL014539, AAEL014541, AAEL014543	AGAP008547, AGAP008548, AGAP028011
OG0000198	7	1	8	AAEL006820, AAEL010579, AAEL022669, AAEL023027, AAEL023361, AAEL026155, AAEL026584	AGAP000167
OG0000199	5	3	8	AAEL007126, AAEL007138, AAEL007139, AAEL011368, AAEL026378	AGAP007755, AGAP008900, AGAP013770
OG0000200	8	0	8	AAEL007133, AAEL020276, AAEL021068, AAEL022332, AAEL022487, AAEL024300, AAEL025580, AAEL026544
OG0000201	8	0	8	AAEL007850, AAEL009724, AAEL009725, AAEL009798, AAEL013086, AAEL014263, AAEL023695, AAEL026299
OG0000202	5	3	8	AAEL008365, AAEL012722, AAEL012724, AAEL012726, AAEL027849	AGAP004016, AGAP004017, AGAP013186
OG0000203	1	7	8	AAEL009484	AGAP000437, AGAP000538, AGAP013080, AGAP013175, AGAP013308, AGAP013319, AGAP013421
OG0000204	8	0	8	AAEL010664, AAEL013338, AAEL013344, AAEL013346, AAEL013348, AAEL013349, AAEL013351, AAEL013352
OG0000205	4	4	8	AAEL011280, AAEL018317, AAEL027127, AAEL027774	AGAP002577, AGAP002578, AGAP012434, AGAP028574
OG0000206	8	0	8	AAEL011305, AAEL012634, AAEL012635, AAEL021586, AAEL023577, AAEL024532, AAEL027202, AAEL027960
OG0000207	4	4	8	AAEL011411, AAEL012042, AAEL012903, AAEL014968	AGAP007483, AGAP007484, AGAP007856, AGAP007859
OG0000208	3	5	8	AAEL012036, AAEL012037, AAEL012041	AGAP004633, AGAP004635, AGAP004636, AGAP013218, AGAP029800
OG0000209	3	5	8	AAEL017097, AAEL017230, AAEL017327	AGAP002633, AGAP009854, AGAP009855, AGAP009857, AGAP009858
OG0000210	2	6	8	AAEL019947, AAEL023231	AGAP006716, AGAP006717, AGAP006874, AGAP006875, AGAP006876, AGAP006877
OG0000211	8	0	8	AAEL020610, AAEL021819, AAEL022434, AAEL022828, AAEL023061, AAEL024213, AAEL024214, AAEL025293
OG0000212	1	7	8	AAEL025036	AGAP004706, AGAP004713, AGAP004897, AGAP005172, AGAP005338, AGAP012457, AGAP013040
OG0000213	1	7	8	AAEL027179	AGAP002445, AGAP002641, AGAP006581, AGAP006583, AGAP006585, AGAP028459, AGAP029825
OG0000214	0	8	8		AGAP000818, AGAP012291, AGAP012292, AGAP012293, AGAP012294, AGAP012295, AGAP012296, AGAP012850
OG0000215	0	8	8		AGAP002298, AGAP004618, AGAP012948, AGAP013083, AGAP013114, AGAP013261, AGAP013347, AGAP013471
OG0000216	0	8	8		AGAP003377, AGAP003379, AGAP003380, AGAP003381, AGAP003382, AGAP003383, AGAP003385, AGAP012866
OG0000217	0	8	8		AGAP005145, AGAP005146, AGAP007069, AGAP007070, AGAP007071, AGAP007072, AGAP007073, AGAP007074
OG0000218	0	8	8		AGAP005571, AGAP005572, AGAP005573, AGAP005574, AGAP029256, AGAP029425, AGAP029427, AGAP029437
OG0000219	0	8	8		AGAP006840, AGAP006841, AGAP006842, AGAP006843, AGAP006844, AGAP006845, AGAP006846, AGAP006847
OG0000220	0	8	8		AGAP010914, AGAP010917, AGAP028426, AGAP028618, AGAP028619, AGAP028695, AGAP028696, AGAP028697
OG0000221	4	3	7	AAEL000216, AAEL004947, AAEL004949, AAEL004953	AGAP001097, AGAP003195, AGAP003197
OG0000222	5	2	7	AAEL000223, AAEL004361, AAEL004367, AAEL004369, AAEL020371	AGAP003993, AGAP003995
OG0000223	3	4	7	AAEL000379, AAEL021993, AAEL029065	AGAP006584, AGAP006586, AGAP029797, AGAP029824
OG0000224	1	6	7	AAEL000575	AGAP001600, AGAP001601, AGAP005457, AGAP005458, AGAP007139, AGAP007140
OG0000225	3	4	7	AAEL000646, AAEL000654, AAEL021450	AGAP011984, AGAP012414, AGAP029716, AGAP029718
OG0000226	7	0	7	AAEL001292, AAEL001312, AAEL001320, AAEL001807, AAEL009591, AAEL020558, AAEL025530
OG0000227	7	0	7	AAEL001342, AAEL004218, AAEL005680, AAEL017043, AAEL017221, AAEL017305, AAEL026266
OG0000228	7	0	7	AAEL001836, AAEL017384, AAEL021670, AAEL022251, AAEL023378, AAEL024000, AAEL027468
OG0000229	7	0	7	AAEL001938, AAEL008384, AAEL008386, AAEL012698, AAEL012700, AAEL012701, AAEL012702
OG0000230	7	0	7	AAEL002316, AAEL004891, AAEL008737, AAEL009918, AAEL012176, AAEL023020, AAEL027376
OG0000231	4	3	7	AAEL002347, AAEL002360, AAEL022646, AAEL024934	AGAP007141, AGAP007142, AGAP028136
OG0000232	3	4	7	AAEL002408, AAEL002426, AAEL002432	AGAP003078, AGAP003422, AGAP003423, AGAP003432
OG0000233	3	4	7	AAEL002499, AAEL009250, AAEL010244	AGAP000585, AGAP011247, AGAP012954, AGAP029774
OG0000234	6	1	7	AAEL002655, AAEL002661, AAEL002665, AAEL002672, AAEL002677, AAEL005666	AGAP006904
OG0000235	5	2	7	AAEL003351, AAEL003358, AAEL017111, AAEL017252, AAEL017359	AGAP008146, AGAP029086
OG0000236	5	2	7	AAEL003403, AAEL007251, AAEL007257, AAEL014554, AAEL024448	AGAP011674, AGAP028629
OG0000237	6	1	7	AAEL003404, AAEL019729, AAEL019730, AAEL020029, AAEL024521, AAEL027671	AGAP011955
OG0000238	6	1	7	AAEL003447, AAEL003992, AAEL009454, AAEL011836, AAEL023588, AAEL025667	AGAP011843
OG0000239	3	4	7	AAEL003743, AAEL006390, AAEL014053	AGAP001587, AGAP001588, AGAP003711, AGAP012818
OG0000240	7	0	7	AAEL004037, AAEL008130, AAEL018003, AAEL020909, AAEL022325, AAEL022592, AAEL023814
OG0000241	6	1	7	AAEL004057, AAEL006816, AAEL022312, AAEL023700, AAEL024825, AAEL026672	AGAP003922
OG0000242	6	1	7	AAEL004505, AAEL008411, AAEL009682, AAEL010957, AAEL010959, AAEL023723	AGAP004740
OG0000243	3	4	7	AAEL004739, AAEL004778, AAEL017453	AGAP008769, AGAP028014, AGAP028056, AGAP028164
OG0000244	7	0	7	AAEL004745, AAEL004746, AAEL004749, AAEL004751, AAEL004754, AAEL004758, AAEL024588
OG0000245	3	4	7	AAEL004928, AAEL007754, AAEL014731	AGAP002854, AGAP002855, AGAP002856, AGAP013529
OG0000246	6	1	7	AAEL004948, AAEL009554, AAEL010270, AAEL013032, AAEL022562, AAEL024716	AGAP009273
OG0000247	5	2	7	AAEL005350, AAEL007991, AAEL007998, AAEL007999, AAEL021528	AGAP006325, AGAP007356
OG0000248	4	3	7	AAEL005607, AAEL005609, AAEL019919, AAEL019920	AGAP001246, AGAP001249, AGAP001252
OG0000249	6	1	7	AAEL005645, AAEL018346, AAEL018347, AAEL019590, AAEL027772, AAEL027984	AGAP029106
OG0000250	5	2	7	AAEL005922, AAEL005938, AAEL013799, AAEL026246, AAEL026973	AGAP001781, AGAP013246
OG0000251	3	4	7	AAEL005955, AAEL005956, AAEL017498	AGAP010826, AGAP010827, AGAP010828, AGAP010829
OG0000252	4	3	7	AAEL006126, AAEL006138, AAEL010434, AAEL012902	AGAP004203, AGAP013109, AGAP013503
OG0000253	4	3	7	AAEL006338, AAEL006344, AAEL006353, AAEL006359	AGAP012697, AGAP029782, AGAP029784
OG0000254	4	3	7	AAEL006605, AAEL006607, AAEL006620, AAEL006624	AGAP004133, AGAP007947, AGAP012604
OG0000255	6	1	7	AAEL006627, AAEL007938, AAEL011916, AAEL011929, AAEL020852, AAEL024686	AGAP011920
OG0000256	4	3	7	AAEL006692, AAEL006696, AAEL022561, AAEL026562	AGAP011912, AGAP011913, AGAP011914
OG0000257	7	0	7	AAEL006858, AAEL020043, AAEL022475, AAEL023452, AAEL024121, AAEL026715, AAEL027757
OG0000258	5	2	7	AAEL007051, AAEL007052, AAEL007055, AAEL007063, AAEL007070	AGAP029753, AGAP029755
OG0000259	4	3	7	AAEL007064, AAEL009176, AAEL009178, AAEL022879	AGAP002796, AGAP002798, AGAP002799
OG0000260	5	2	7	AAEL007298, AAEL013910, AAEL013912, AAEL024012, AAEL026746	AGAP004784, AGAP004787
OG0000261	3	4	7	AAEL008017, AAEL008018, AAEL025214	AGAP000192, AGAP000193, AGAP000194, AGAP010414
OG0000262	5	2	7	AAEL008260, AAEL008266, AAEL010522, AAEL012881, AAEL023503	AGAP006770, AGAP011180
OG0000263	5	2	7	AAEL008368, AAEL008442, AAEL008448, AAEL017564, AAEL022663	AGAP006666, AGAP006667
OG0000264	1	6	7	AAEL008843	AGAP000706, AGAP009825, AGAP012124, AGAP012911, AGAP013152, AGAP013372
OG0000265	6	1	7	AAEL009411, AAEL013025, AAEL018177, AAEL020200, AAEL021302, AAEL023532	AGAP011893
OG0000266	3	4	7	AAEL010536, AAEL010540, AAEL017128	AGAP006019, AGAP008961, AGAP008962, AGAP008965
OG0000267	1	6	7	AAEL011073	AGAP001123, AGAP005047, AGAP007756, AGAP007757, AGAP010195, AGAP029175
OG0000268	7	0	7	AAEL012225, AAEL012230, AAEL017570, AAEL019429, AAEL023856, AAEL027416, AAEL029015
OG0000269	7	0	7	AAEL013027, AAEL014561, AAEL017403, AAEL017501, AAEL021735, AAEL025303, AAEL026426
OG0000270	4	3	7	AAEL013554, AAEL013556, AAEL014019, AAEL014830	AGAP006047, AGAP006048, AGAP006049
OG0000271	6	1	7	AAEL013959, AAEL021121, AAEL023571, AAEL024457, AAEL027377, AAEL027584	AGAP010309
OG0000272	6	1	7	AAEL014147, AAEL014149, AAEL014254, AAEL020536, AAEL023221, AAEL027123	AGAP010882
OG0000273	4	3	7	AAEL015079, AAEL015265, AAEL015267, AAEL020714	AGAP000140, AGAP000293, AGAP004475
OG0000274	2	5	7	AAEL017451, AAEL017460	AGAP009751, AGAP009754, AGAP009755, AGAP009756, AGAP028646
OG0000275	7	0	7	AAEL019462, AAEL022626, AAEL027128, AAEL027314, AAEL027358, AAEL027511, AAEL028098
OG0000276	7	0	7	AAEL020394, AAEL022159, AAEL022203, AAEL023178, AAEL023344, AAEL025720, AAEL026586
OG0000277	7	0	7	AAEL020414, AAEL022039, AAEL022545, AAEL023055, AAEL023645, AAEL026361, AAEL027025
OG0000278	1	6	7	AAEL023991	AGAP001988, AGAP001989, AGAP011980, AGAP011981, AGAP012011, AGAP028541
OG0000279	0	7	7		AGAP000230, AGAP002995, AGAP011978, AGAP011979, AGAP011989, AGAP011990, AGAP011991
OG0000280	0	7	7		AGAP000548, AGAP000607, AGAP000609, AGAP000610, AGAP000611, AGAP000612, AGAP001374
OG0000281	0	7	7		AGAP000871, AGAP007407, AGAP007408, AGAP007409, AGAP007410, AGAP007411, AGAP007412
OG0000282	0	7	7		AGAP002904, AGAP003531, AGAP004432, AGAP008759, AGAP012872, AGAP012951, AGAP012969
OG0000283	0	7	7		AGAP003759, AGAP003760, AGAP003762, AGAP003763, AGAP003764, AGAP003765, AGAP013346
OG0000284	0	7	7		AGAP003812, AGAP012484, AGAP012888, AGAP013250, AGAP028579, AGAP029353, AGAP029431
OG0000285	0	7	7		AGAP004920, AGAP004921, AGAP011951, AGAP011952, AGAP012945, AGAP029816, AGAP029817
OG0000286	0	7	7		AGAP005497, AGAP006417, AGAP006418, AGAP006419, AGAP006420, AGAP006421, AGAP006443
OG0000287	0	7	7		AGAP006555, AGAP006559, AGAP006560, AGAP006562, AGAP006564, AGAP006566, AGAP029822
OG0000288	0	7	7		AGAP006556, AGAP006557, AGAP006558, AGAP006561, AGAP006563, AGAP028428, AGAP028429
OG0000289	0	7	7		AGAP006881, AGAP028708, AGAP028709, AGAP029765, AGAP029779, AGAP029780, AGAP029781
OG0000290	0	7	7		AGAP008436, AGAP008437, AGAP009835, AGAP012735, AGAP012848, AGAP027980, AGAP028128
OG0000291	0	7	7		AGAP009360, AGAP012807, AGAP013731, AGAP013756, AGAP028158, AGAP029089, AGAP029094
OG0000292	0	7	7		AGAP009704, AGAP009705, AGAP009706, AGAP009707, AGAP009718, AGAP009719, AGAP009720
OG0000293	0	7	7		AGAP010903, AGAP010904, AGAP010905, AGAP010906, AGAP010907, AGAP010908, AGAP029180
OG0000294	5	1	6	AAEL000140, AAEL000148, AAEL003176, AAEL015442, AAEL023842	AGAP004081
OG0000295	3	3	6	AAEL000242, AAEL007143, AAEL007146	AGAP000254, AGAP008201, AGAP029240
OG0000296	6	0	6	AAEL000261, AAEL000292, AAEL000299, AAEL006694, AAEL022195, AAEL022478
OG0000297	3	3	6	AAEL000505, AAEL000515, AAEL024475	AGAP002008, AGAP002137, AGAP003236
OG0000298	6	0	6	AAEL000613, AAEL000614, AAEL000628, AAEL006465, AAEL017294, AAEL022696
OG0000299	6	0	6	AAEL000793, AAEL002476, AAEL002682, AAEL002693, AAEL006524, AAEL009239
OG0000300	6	0	6	AAEL000870, AAEL000881, AAEL000916, AAEL000921, AAEL023036, AAEL023960
OG0000301	6	0	6	AAEL000889, AAEL000898, AAEL000904, AAEL000905, AAEL000918, AAEL021128
OG0000302	3	3	6	AAEL001041, AAEL013991, AAEL013997	AGAP005911, AGAP005912, AGAP005913
OG0000303	3	3	6	AAEL001237, AAEL021995, AAEL025155	AGAP008817, AGAP009759, AGAP028200
OG0000304	5	1	6	AAEL001287, AAEL001294, AAEL001306, AAEL001309, AAEL026057	AGAP009388
OG0000305	3	3	6	AAEL001533, AAEL001548, AAEL001586	AGAP007588, AGAP007589, AGAP011564
OG0000306	5	1	6	AAEL001735, AAEL008866, AAEL008869, AAEL008872, AAEL008873	AGAP006013
OG0000307	5	1	6	AAEL002699, AAEL002720, AAEL002730, AAEL017249, AAEL024006	AGAP007693
OG0000308	4	2	6	AAEL002726, AAEL006417, AAEL006424, AAEL026087	AGAP008278, AGAP008279
OG0000309	3	3	6	AAEL002880, AAEL021181, AAEL027048	AGAP010415, AGAP010635, AGAP010662
OG0000310	2	4	6	AAEL002904, AAEL002917	AGAP009056, AGAP010765, AGAP010766, AGAP028153
OG0000311	6	0	6	AAEL003053, AAEL003057, AAEL009695, AAEL019874, AAEL026620, AAEL027045
OG0000312	5	1	6	AAEL003056, AAEL003066, AAEL010963, AAEL019584, AAEL019585	AGAP006414
OG0000313	5	1	6	AAEL003128, AAEL009877, AAEL021885, AAEL024262, AAEL024666	AGAP011356
OG0000314	6	0	6	AAEL003574, AAEL014257, AAEL020190, AAEL020632, AAEL020721, AAEL025892
OG0000315	5	1	6	AAEL003628, AAEL003631, AAEL003632, AAEL015465, AAEL022578	AGAP003057
OG0000316	1	5	6	AAEL003629	AGAP003053, AGAP003054, AGAP003055, AGAP012758, AGAP013396
OG0000317	3	3	6	AAEL003715, AAEL009537, AAEL020849	AGAP012131, AGAP012132, AGAP028721
OG0000318	6	0	6	AAEL003726, AAEL003728, AAEL003737, AAEL003738, AAEL003740, AAEL023973
OG0000319	4	2	6	AAEL003809, AAEL003810, AAEL008232, AAEL010868	AGAP001027, AGAP003020
OG0000320	6	0	6	AAEL004323, AAEL005182, AAEL005199, AAEL005200, AAEL020054, AAEL023662
OG0000321	4	2	6	AAEL004386, AAEL004388, AAEL004390, AAEL026038	AGAP004036, AGAP004038
OG0000322	6	0	6	AAEL004512, AAEL004519, AAEL006603, AAEL019644, AAEL019645, AAEL023280
OG0000323	3	3	6	AAEL004575, AAEL004580, AAEL004582	AGAP002055, AGAP002056, AGAP002058
OG0000324	4	2	6	AAEL004699, AAEL012243, AAEL021755, AAEL025856	AGAP002654, AGAP002655
OG0000325	6	0	6	AAEL004743, AAEL005026, AAEL005043, AAEL005045, AAEL015644, AAEL017209
OG0000326	6	0	6	AAEL004747, AAEL004752, AAEL004759, AAEL004771, AAEL004772, AAEL004782
OG0000327	1	5	6	AAEL005019	AGAP008258, AGAP008259, AGAP008260, AGAP008261, AGAP013767
OG0000328	4	2	6	AAEL005134, AAEL017192, AAEL023653, AAEL027547	AGAP011347, AGAP011348
OG0000329	3	3	6	AAEL005160, AAEL006372, AAEL020162	AGAP001531, AGAP002331, AGAP012302
OG0000330	5	1	6	AAEL005287, AAEL008094, AAEL013691, AAEL021152, AAEL023206	AGAP000204
OG0000331	2	4	6	AAEL005386, AAEL024751	AGAP009576, AGAP009581, AGAP012623, AGAP012765
OG0000332	6	0	6	AAEL005556, AAEL005585, AAEL019570, AAEL019661, AAEL023738, AAEL027681
OG0000333	5	1	6	AAEL005577, AAEL013044, AAEL013048, AAEL013054, AAEL020928	AGAP029762
OG0000334	4	2	6	AAEL005602, AAEL005606, AAEL009767, AAEL009769	AGAP000475, AGAP029224
OG0000335	6	0	6	AAEL005682, AAEL005687, AAEL005691, AAEL005710, AAEL005711, AAEL020038
OG0000336	3	3	6	AAEL005714, AAEL007038, AAEL017524	AGAP000971, AGAP004611, AGAP013377
OG0000337	5	1	6	AAEL005786, AAEL009434, AAEL019497, AAEL019498, AAEL022007	AGAP002973
OG0000338	3	3	6	AAEL005992, AAEL014344, AAEL025717	AGAP003496, AGAP003498, AGAP013468
OG0000339	3	3	6	AAEL006121, AAEL006123, AAEL006136	AGAP001707, AGAP013020, AGAP028471
OG0000340	5	1	6	AAEL006168, AAEL008668, AAEL014349, AAEL014350, AAEL014354	AGAP009844
OG0000341	3	3	6	AAEL006180, AAEL009886, AAEL009888	AGAP001557, AGAP003274, AGAP003275
OG0000342	5	1	6	AAEL006202, AAEL013418, AAEL013420, AAEL013422, AAEL013423	AGAP004067
OG0000343	6	0	6	AAEL006335, AAEL010647, AAEL014765, AAEL014766, AAEL019978, AAEL019979
OG0000344	3	3	6	AAEL006487, AAEL006995, AAEL007016	AGAP001185, AGAP001966, AGAP013429
OG0000345	3	3	6	AAEL006978, AAEL022582, AAEL026610	AGAP009098, AGAP009099, AGAP009100
OG0000346	3	3	6	AAEL007447, AAEL007449, AAEL019609	AGAP007802, AGAP007803, AGAP007808
OG0000347	4	2	6	AAEL007647, AAEL023812, AAEL026389, AAEL028214	AGAP003063, AGAP029394
OG0000348	1	5	6	AAEL007830	AGAP001864, AGAP008552, AGAP008553, AGAP013224, AGAP013305
OG0000349	5	1	6	AAEL007947, AAEL007948, AAEL022511, AAEL024134, AAEL027519	AGAP009197
OG0000350	3	3	6	AAEL008036, AAEL022882, AAEL023900	AGAP002009, AGAP009568, AGAP011441
OG0000351	6	0	6	AAEL008206, AAEL008207, AAEL008208, AAEL008217, AAEL008221, AAEL023597
OG0000352	2	4	6	AAEL008308, AAEL008313	AGAP001005, AGAP001024, AGAP013024, AGAP013460
OG0000353	5	1	6	AAEL008527, AAEL017567, AAEL023636, AAEL023711, AAEL026826	AGAP002441
OG0000354	4	2	6	AAEL008721, AAEL010812, AAEL018201, AAEL019833	AGAP002705, AGAP009566
OG0000355	3	3	6	AAEL008817, AAEL011169, AAEL013757	AGAP001345, AGAP001657, AGAP001659
OG0000356	4	2	6	AAEL009044, AAEL009045, AAEL009050, AAEL018178	AGAP007017, AGAP029642
OG0000357	5	1	6	AAEL009836, AAEL009837, AAEL009852, AAEL017022, AAEL024963	AGAP004883
OG0000358	4	2	6	AAEL009860, AAEL009863, AAEL020112, AAEL022139	AGAP007054, AGAP007055
OG0000359	3	3	6	AAEL010381, AAEL010386, AAEL010390	AGAP006222, AGAP006223, AGAP007029
OG0000360	3	3	6	AAEL010981, AAEL021016, AAEL024525	AGAP006215, AGAP006216, AGAP029478
OG0000361	2	4	6	AAEL011331, AAEL011333	AGAP011616, AGAP011617, AGAP011619, AGAP028207
OG0000362	3	3	6	AAEL011332, AAEL020253, AAEL026737	AGAP011609, AGAP011613, AGAP011618
OG0000363	1	5	6	AAEL011898	AGAP009415, AGAP009416, AGAP009417, AGAP009418, AGAP009419
OG0000364	2	4	6	AAEL011966, AAEL026805	AGAP004262, AGAP004263, AGAP011167, AGAP012703
OG0000365	2	4	6	AAEL012422, AAEL012425	AGAP002765, AGAP002766, AGAP002767, AGAP002769
OG0000366	6	0	6	AAEL013375, AAEL019665, AAEL022442, AAEL024806, AAEL025985, AAEL026752
OG0000367	3	3	6	AAEL014411, AAEL014412, AAEL014413	AGAP003065, AGAP003066, AGAP003067
OG0000368	6	0	6	AAEL014443, AAEL020273, AAEL020790, AAEL021104, AAEL021592, AAEL025755
OG0000369	6	0	6	AAEL014451, AAEL014453, AAEL014454, AAEL014455, AAEL023058, AAEL025272
OG0000370	6	0	6	AAEL015020, AAEL015021, AAEL015022, AAEL015573, AAEL021375, AAEL026915
OG0000371	6	0	6	AAEL017144, AAEL017380, AAEL021929, AAEL025126, AAEL025531, AAEL026300
OG0000372	1	5	6	AAEL017182	AGAP001169, AGAP001170, AGAP001171, AGAP001172, AGAP001173
OG0000373	2	4	6	AAEL017235, AAEL017323	AGAP009802, AGAP009803, AGAP009804, AGAP009805
OG0000374	5	1	6	AAEL017270, AAEL017308, AAEL017547, AAEL021095, AAEL023894	AGAP006926
OG0000375	5	1	6	AAEL017398, AAEL017557, AAEL021835, AAEL022723, AAEL025135	AGAP010507
OG0000376	1	5	6	AAEL020008	AGAP009247, AGAP009248, AGAP009250, AGAP009253, AGAP010542
OG0000377	1	5	6	AAEL020127	AGAP003750, AGAP012979, AGAP013016, AGAP013123, AGAP013492
OG0000378	5	1	6	AAEL020196, AAEL021950, AAEL022693, AAEL023193, AAEL024761	AGAP001640
OG0000379	1	5	6	AAEL025497	AGAP012199, AGAP012201, AGAP012202, AGAP012710, AGAP012894
OG0000380	0	6	6		AGAP000088, AGAP001861, AGAP008356, AGAP008358, AGAP013490, AGAP028019
OG0000381	0	6	6		AGAP000651, AGAP001676, AGAP005095, AGAP011514, AGAP011515, AGAP011516
OG0000382	0	6	6		AGAP000976, AGAP013002, AGAP013312, AGAP013334, AGAP013502, AGAP013534
OG0000383	0	6	6		AGAP001664, AGAP001665, AGAP001666, AGAP001667, AGAP001668, AGAP001669
OG0000384	0	6	6		AGAP002763, AGAP013154, AGAP013285, AGAP013363, AGAP013416, AGAP013520
OG0000385	0	6	6		AGAP006003, AGAP006004, AGAP006005, AGAP006006, AGAP006007, AGAP006008
OG0000386	0	6	6		AGAP006379, AGAP006380, AGAP007504, AGAP011518, AGAP012155, AGAP012156
OG0000387	0	6	6		AGAP007291, AGAP007292, AGAP007293, AGAP011326, AGAP012677, AGAP013034
OG0000388	0	6	6		AGAP008280, AGAP008281, AGAP008282, AGAP008283, AGAP008284, AGAP028120
OG0000389	0	6	6		AGAP010980, AGAP029727, AGAP029728, AGAP029729, AGAP029730, AGAP029731
OG0000390	0	6	6		AGAP012536, AGAP012998, AGAP013104, AGAP013235, AGAP013428, AGAP013444
OG0000391	2	3	5	AAEL000024, AAEL000029	AGAP003096, AGAP003097, AGAP004324
OG0000392	5	0	5	AAEL000057, AAEL007619, AAEL026297, AAEL026478, AAEL027951
OG0000393	3	2	5	AAEL000069, AAEL022316, AAEL024813	AGAP003258, AGAP003260
OG0000394	1	4	5	AAEL000143	AGAP003515, AGAP003516, AGAP012661, AGAP012801
OG0000395	2	3	5	AAEL000165, AAEL000200	AGAP010046, AGAP010047, AGAP029395
OG0000396	3	2	5	AAEL000172, AAEL019940, AAEL019941	AGAP028205, AGAP029608
OG0000397	2	3	5	AAEL000439, AAEL003147	AGAP003562, AGAP003565, AGAP003566
OG0000398	4	1	5	AAEL000477, AAEL000502, AAEL022543, AAEL024335	AGAP001787
OG0000399	5	0	5	AAEL000530, AAEL000545, AAEL000546, AAEL004724, AAEL008532
OG0000400	3	2	5	AAEL000669, AAEL023031, AAEL027395	AGAP012388, AGAP012391
OG0000401	5	0	5	AAEL000689, AAEL000690, AAEL000705, AAEL006496, AAEL018135
OG0000402	5	0	5	AAEL000732, AAEL000748, AAEL021023, AAEL022961, AAEL025319
OG0000403	4	1	5	AAEL000776, AAEL003010, AAEL012693, AAEL021579	AGAP001544
OG0000404	2	3	5	AAEL000800, AAEL000842	AGAP011653, AGAP011654, AGAP029268
OG0000405	3	2	5	AAEL000801, AAEL013360, AAEL029029	AGAP008510, AGAP028084
OG0000406	2	3	5	AAEL000932, AAEL024251	AGAP010601, AGAP010602, AGAP010604
OG0000407	3	2	5	AAEL001016, AAEL026644, AAEL027902	AGAP003991, AGAP013536
OG0000408	3	2	5	AAEL001073, AAEL001091, AAEL005790	AGAP000184, AGAP004159
OG0000409	2	3	5	AAEL001087, AAEL015283	AGAP004156, AGAP004157, AGAP012761
OG0000410	4	1	5	AAEL001143, AAEL013001, AAEL013004, AAEL023874	AGAP005178
OG0000411	4	1	5	AAEL001146, AAEL001151, AAEL008252, AAEL022849	AGAP029766
OG0000412	2	3	5	AAEL001293, AAEL001307	AGAP009381, AGAP009382, AGAP009385
OG0000413	3	2	5	AAEL001313, AAEL024618, AAEL025046	AGAP009389, AGAP012764
OG0000414	3	2	5	AAEL001438, AAEL006004, AAEL011910	AGAP009521, AGAP011724
OG0000415	3	2	5	AAEL001632, AAEL001640, AAEL001672	AGAP008732, AGAP028052
OG0000416	4	1	5	AAEL001651, AAEL021881, AAEL023150, AAEL027653	AGAP007819
OG0000417	4	1	5	AAEL001674, AAEL001693, AAEL001703, AAEL008769	AGAP005065
OG0000418	2	3	5	AAEL001709, AAEL005364	AGAP003359, AGAP012474, AGAP029572
OG0000419	3	2	5	AAEL001732, AAEL001740, AAEL001745	AGAP006015, AGAP006016
OG0000420	3	2	5	AAEL001816, AAEL001822, AAEL018042	AGAP008404, AGAP028212
OG0000421	4	1	5	AAEL001820, AAEL018004, AAEL020509, AAEL023225	AGAP009018
OG0000422	4	1	5	AAEL001882, AAEL001897, AAEL019902, AAEL019903	AGAP009146
OG0000423	5	0	5	AAEL002085, AAEL003380, AAEL003399, AAEL007812, AAEL013798
OG0000424	4	1	5	AAEL002092, AAEL026306, AAEL027846, AAEL028212	AGAP003384
OG0000425	4	1	5	AAEL002158, AAEL004335, AAEL007383, AAEL010396	AGAP002464
OG0000426	3	2	5	AAEL002177, AAEL008619, AAEL011917	AGAP003971, AGAP011919
OG0000427	5	0	5	AAEL002199, AAEL002242, AAEL009935, AAEL009938, AAEL009945
OG0000428	3	2	5	AAEL002321, AAEL020051, AAEL024086	AGAP000063, AGAP000067
OG0000429	3	2	5	AAEL002428, AAEL017435, AAEL019783	AGAP001754, AGAP029614
OG0000430	3	2	5	AAEL002555, AAEL002574, AAEL027912	AGAP001634, AGAP001635
OG0000431	3	2	5	AAEL002612, AAEL002619, AAEL017538	AGAP028173, AGAP028219
OG0000432	5	0	5	AAEL002671, AAEL022333, AAEL023478, AAEL027386, AAEL028014
OG0000433	2	3	5	AAEL002690, AAEL002692	AGAP007932, AGAP007933, AGAP029235
OG0000434	2	3	5	AAEL002827, AAEL003393	AGAP012081, AGAP012106, AGAP029205
OG0000435	3	2	5	AAEL002861, AAEL002882, AAEL021615	AGAP002652, AGAP003322
OG0000436	5	0	5	AAEL002864, AAEL003773, AAEL005402, AAEL020080, AAEL025468
OG0000437	4	1	5	AAEL002867, AAEL017409, AAEL024386, AAEL026318	AGAP002653
OG0000438	4	1	5	AAEL002938, AAEL020942, AAEL021711, AAEL025774	AGAP000625
OG0000439	1	4	5	AAEL003075	AGAP005745, AGAP005746, AGAP005747, AGAP005748
OG0000440	3	2	5	AAEL003163, AAEL003173, AAEL009489	AGAP001671, AGAP029808
OG0000441	5	0	5	AAEL003225, AAEL003232, AAEL003241, AAEL003266, AAEL029009
OG0000442	3	2	5	AAEL003275, AAEL026581, AAEL027904	AGAP002226, AGAP005269
OG0000443	3	2	5	AAEL003289, AAEL029070, AAEL029071	AGAP011303, AGAP011305
OG0000444	3	2	5	AAEL003297, AAEL003298, AAEL003317	AGAP011302, AGAP028096
OG0000445	4	1	5	AAEL003594, AAEL024689, AAEL024927, AAEL028067	AGAP006472
OG0000446	5	0	5	AAEL003600, AAEL003601, AAEL007872, AAEL019996, AAEL022638
OG0000447	4	1	5	AAEL003616, AAEL011029, AAEL011031, AAEL011032	AGAP010848
OG0000448	2	3	5	AAEL003622, AAEL004573	AGAP003049, AGAP012720, AGAP013071
OG0000449	2	3	5	AAEL003633, AAEL011519	AGAP010855, AGAP010856, AGAP029611
OG0000450	4	1	5	AAEL003797, AAEL021797, AAEL022585, AAEL024960	AGAP005862
OG0000451	4	1	5	AAEL003832, AAEL003841, AAEL003857, AAEL027792	AGAP011294
OG0000452	2	3	5	AAEL003868, AAEL003893	AGAP003342, AGAP003345, AGAP012599
OG0000453	4	1	5	AAEL003890, AAEL006984, AAEL006989, AAEL006992	AGAP003343
OG0000454	5	0	5	AAEL003954, AAEL003971, AAEL014372, AAEL014439, AAEL014440
OG0000455	3	2	5	AAEL003982, AAEL020855, AAEL024092	AGAP009683, AGAP029641
OG0000456	3	2	5	AAEL004000, AAEL009517, AAEL009551	AGAP011186, AGAP011187
OG0000457	4	1	5	AAEL004002, AAEL022918, AAEL026344, AAEL027263	AGAP003783
OG0000458	3	2	5	AAEL004009, AAEL004013, AAEL004015	AGAP003780, AGAP003781
OG0000459	1	4	5	AAEL004043	AGAP010110, AGAP010111, AGAP010118, AGAP010125
OG0000460	2	3	5	AAEL004092, AAEL004103	AGAP011046, AGAP011047, AGAP011048
OG0000461	4	1	5	AAEL004244, AAEL010942, AAEL014134, AAEL028163	AGAP002427
OG0000462	3	2	5	AAEL004247, AAEL004836, AAEL022427	AGAP006594, AGAP006595
OG0000463	3	2	5	AAEL004317, AAEL010182, AAEL012611	AGAP003771, AGAP013038
OG0000464	3	2	5	AAEL004353, AAEL004382, AAEL011183	AGAP003841, AGAP013423
OG0000465	2	3	5	AAEL004524, AAEL019853	AGAP000315, AGAP000571, AGAP004719
OG0000466	3	2	5	AAEL004671, AAEL004676, AAEL004677	AGAP010455, AGAP010885
OG0000467	3	2	5	AAEL004692, AAEL025294, AAEL025650	AGAP000702, AGAP013356
OG0000468	3	2	5	AAEL004814, AAEL004821, AAEL020981	AGAP010973, AGAP010974
OG0000469	4	1	5	AAEL004889, AAEL009919, AAEL013624, AAEL020840	AGAP004667
OG0000470	4	1	5	AAEL005073, AAEL005079, AAEL012510, AAEL023627	AGAP005933
OG0000471	3	2	5	AAEL005176, AAEL009230, AAEL024541	AGAP006791, AGAP006794
OG0000472	1	4	5	AAEL005309	AGAP000281, AGAP004789, AGAP004791, AGAP029390
OG0000473	3	2	5	AAEL005388, AAEL021977, AAEL026536	AGAP007440, AGAP009631
OG0000474	3	2	5	AAEL005409, AAEL010676, AAEL022054	AGAP003718, AGAP006629
OG0000475	4	1	5	AAEL005527, AAEL012676, AAEL012690, AAEL023415	AGAP001549
OG0000476	3	2	5	AAEL005533, AAEL012567, AAEL014910	AGAP000732, AGAP004350
OG0000477	3	2	5	AAEL005536, AAEL012528, AAEL020998	AGAP008647, AGAP029640
OG0000478	4	1	5	AAEL005668, AAEL010969, AAEL019614, AAEL019615	AGAP006913
OG0000479	1	4	5	AAEL005725	AGAP002838, AGAP003657, AGAP013054, AGAP013404
OG0000480	2	3	5	AAEL006042, AAEL009185	AGAP002033, AGAP012924, AGAP029820
OG0000481	4	1	5	AAEL006160, AAEL007040, AAEL019809, AAEL022989	AGAP002506
OG0000482	3	2	5	AAEL006264, AAEL006274, AAEL022795	AGAP005237, AGAP005238
OG0000483	3	2	5	AAEL006542, AAEL006563, AAEL009291	AGAP005434, AGAP007505
OG0000484	4	1	5	AAEL006614, AAEL019764, AAEL020287, AAEL023251	AGAP007883
OG0000485	5	0	5	AAEL006691, AAEL006699, AAEL006702, AAEL006704, AAEL028145
OG0000486	1	4	5	AAEL006835	AGAP012995, AGAP013366, AGAP013463, AGAP029279
OG0000487	4	1	5	AAEL006930, AAEL007696, AAEL026504, AAEL027765	AGAP009515
OG0000488	4	1	5	AAEL006973, AAEL010583, AAEL014066, AAEL014076	AGAP009239
OG0000489	2	3	5	AAEL007030, AAEL027019	AGAP000973, AGAP003730, AGAP012841
OG0000490	5	0	5	AAEL007048, AAEL012805, AAEL021150, AAEL025897, AAEL028049
OG0000491	4	1	5	AAEL007090, AAEL007094, AAEL007097, AAEL007098	AGAP005972
OG0000492	3	2	5	AAEL007260, AAEL021790, AAEL028170	AGAP004178, AGAP011548
OG0000493	4	1	5	AAEL007295, AAEL010314, AAEL024539, AAEL027836	AGAP028510
OG0000494	4	1	5	AAEL007507, AAEL015092, AAEL023877, AAEL027689	AGAP003510
OG0000495	3	2	5	AAEL007593, AAEL007597, AAEL011593	AGAP004317, AGAP004318
OG0000496	4	1	5	AAEL007692, AAEL019534, AAEL020254, AAEL024197	AGAP004392
OG0000497	1	4	5	AAEL007711	AGAP006268, AGAP028747, AGAP028748, AGAP028749
OG0000498	5	0	5	AAEL008152, AAEL008159, AAEL010137, AAEL025481, AAEL027985
OG0000499	2	3	5	AAEL008380, AAEL009528	AGAP005975, AGAP028750, AGAP028751
OG0000500	3	2	5	AAEL008415, AAEL008419, AAEL027646	AGAP002312, AGAP002313
OG0000501	4	1	5	AAEL008416, AAEL021627, AAEL022499, AAEL023848	AGAP002307
OG0000502	2	3	5	AAEL008624, AAEL026976	AGAP008945, AGAP009471, AGAP009472
OG0000503	1	4	5	AAEL008681	AGAP002910, AGAP002911, AGAP002912, AGAP010708
OG0000504	3	2	5	AAEL008767, AAEL008782, AAEL008784	AGAP004900, AGAP006539
OG0000505	2	3	5	AAEL008928, AAEL008931	AGAP001281, AGAP001283, AGAP001284
OG0000506	5	0	5	AAEL009193, AAEL009203, AAEL009204, AAEL009207, AAEL022256
OG0000507	2	3	5	AAEL009473, AAEL020499	AGAP000922, AGAP005183, AGAP010922
OG0000508	5	0	5	AAEL009993, AAEL020258, AAEL029031, AAEL029034, AAEL029057
OG0000509	3	2	5	AAEL010070, AAEL026935, AAEL027269	AGAP010318, AGAP012525
OG0000510	5	0	5	AAEL010104, AAEL014239, AAEL021669, AAEL023083, AAEL026690
OG0000511	1	4	5	AAEL010125	AGAP005693, AGAP007033, AGAP007035, AGAP007036
OG0000512	2	3	5	AAEL010127, AAEL025106	AGAP005451, AGAP006095, AGAP007040
OG0000513	3	2	5	AAEL010294, AAEL019737, AAEL023530	AGAP000255, AGAP010230
OG0000514	3	2	5	AAEL010769, AAEL013936, AAEL027145	AGAP009212, AGAP009670
OG0000515	3	2	5	AAEL010776, AAEL010780, AAEL010782	AGAP009592, AGAP009593
OG0000516	3	2	5	AAEL011038, AAEL021173, AAEL021609	AGAP004303, AGAP006826
OG0000517	2	3	5	AAEL011106, AAEL014072	AGAP001539, AGAP002231, AGAP002735
OG0000518	3	2	5	AAEL011112, AAEL011126, AAEL024696	AGAP003583, AGAP003584
OG0000519	1	4	5	AAEL011193	AGAP007879, AGAP007880, AGAP007881, AGAP008570
OG0000520	2	3	5	AAEL011313, AAEL011314	AGAP008684, AGAP008685, AGAP008686
OG0000521	2	3	5	AAEL011658, AAEL011662	AGAP001264, AGAP013078, AGAP013443
OG0000522	3	2	5	AAEL011808, AAEL011809, AAEL027830	AGAP002551, AGAP002552
OG0000523	1	4	5	AAEL012266	AGAP003608, AGAP009240, AGAP009241, AGAP009246
OG0000524	1	4	5	AAEL012509	AGAP005370, AGAP005371, AGAP005372, AGAP005373
OG0000525	3	2	5	AAEL012563, AAEL012564, AAEL012565	AGAP006676, AGAP006677
OG0000526	3	2	5	AAEL012644, AAEL012647, AAEL012650	AGAP010363, AGAP010364
OG0000527	5	0	5	AAEL013003, AAEL013006, AAEL019775, AAEL026259, AAEL026333
OG0000528	5	0	5	AAEL013442, AAEL013443, AAEL013444, AAEL021060, AAEL025773
OG0000529	2	3	5	AAEL013775, AAEL024607	AGAP007745, AGAP008579, AGAP008580
OG0000530	3	2	5	AAEL014031, AAEL023182, AAEL023548	AGAP004096, AGAP009341
OG0000531	5	0	5	AAEL014240, AAEL014241, AAEL014245, AAEL025356, AAEL026838
OG0000532	3	2	5	AAEL014551, AAEL020599, AAEL027829	AGAP000210, AGAP000211
OG0000533	5	0	5	AAEL014625, AAEL019873, AAEL020641, AAEL021088, AAEL025693
OG0000534	2	3	5	AAEL014744, AAEL027937	AGAP006367, AGAP006611, AGAP007004
OG0000535	5	0	5	AAEL014757, AAEL021330, AAEL022722, AAEL023736, AAEL024297
OG0000536	3	2	5	AAEL014853, AAEL023908, AAEL024910	AGAP000389, AGAP004862
OG0000537	1	4	5	AAEL014958	AGAP005012, AGAP005013, AGAP012567, AGAP012568
OG0000538	2	3	5	AAEL015073, AAEL019808	AGAP008563, AGAP008567, AGAP008569
OG0000539	4	1	5	AAEL017232, AAEL024249, AAEL025172, AAEL027929	AGAP008458
OG0000540	3	2	5	AAEL017334, AAEL021320, AAEL026472	AGAP002629, AGAP007101
OG0000541	5	0	5	AAEL017372, AAEL023370, AAEL025771, AAEL027086, AAEL027117
OG0000542	1	4	5	AAEL018320	AGAP008823, AGAP008824, AGAP008825, AGAP012545
OG0000543	3	2	5	AAEL019476, AAEL022542, AAEL025130	AGAP013265, AGAP029103
OG0000544	4	1	5	AAEL019542, AAEL020521, AAEL024405, AAEL024673	AGAP007452
OG0000545	3	2	5	AAEL019695, AAEL023490, AAEL027038	AGAP008244, AGAP010825
OG0000546	3	2	5	AAEL019773, AAEL021442, AAEL027978	AGAP010884, AGAP029664
OG0000547	3	2	5	AAEL020210, AAEL021084, AAEL021318	AGAP000449, AGAP000452
OG0000548	3	2	5	AAEL020366, AAEL021534, AAEL026085	AGAP007487, AGAP013737
OG0000549	5	0	5	AAEL020630, AAEL021552, AAEL024289, AAEL026465, AAEL027344
OG0000550	2	3	5	AAEL020635, AAEL023413	AGAP005978, AGAP011256, AGAP011262
OG0000551	5	0	5	AAEL020643, AAEL021899, AAEL023186, AAEL023677, AAEL026405
OG0000552	5	0	5	AAEL020837, AAEL021009, AAEL022998, AAEL023149, AAEL026907
OG0000553	5	0	5	AAEL021293, AAEL022474, AAEL024223, AAEL025392, AAEL028227
OG0000554	2	3	5	AAEL021647, AAEL025031	AGAP000379, AGAP002349, AGAP012114
OG0000555	2	3	5	AAEL021685, AAEL025434	AGAP005697, AGAP005698, AGAP012903
OG0000556	3	2	5	AAEL022731, AAEL025041, AAEL027664	AGAP001672, AGAP010435
OG0000557	4	1	5	AAEL022748, AAEL024376, AAEL025603, AAEL027888	AGAP028594
OG0000558	5	0	5	AAEL023910, AAEL025093, AAEL027630, AAEL027683, AAEL027894
OG0000559	1	4	5	AAEL024476	AGAP009349, AGAP013720, AGAP028565, AGAP029351
OG0000560	1	4	5	AAEL024513	AGAP010299, AGAP010300, AGAP029252, AGAP029438
OG0000561	2	3	5	AAEL024746, AAEL027654	AGAP000275, AGAP002484, AGAP012953
OG0000562	0	5	5		AGAP000816, AGAP000817, AGAP012997, AGAP013173, AGAP013424
OG0000563	0	5	5		AGAP000917, AGAP000921, AGAP012535, AGAP012564, AGAP012675
OG0000564	0	5	5		AGAP001087, AGAP012483, AGAP012700, AGAP012752, AGAP012762
OG0000565	0	5	5		AGAP001881, AGAP004809, AGAP012984, AGAP013150, AGAP013155
OG0000566	0	5	5		AGAP002353, AGAP003082, AGAP003083, AGAP005185, AGAP012620
OG0000567	0	5	5		AGAP003639, AGAP003640, AGAP003641, AGAP003642, AGAP004015
OG0000568	0	5	5		AGAP003811, AGAP003813, AGAP008483, AGAP013125, AGAP029338
OG0000569	0	5	5		AGAP005499, AGAP005500, AGAP005501, AGAP005502, AGAP005503
OG0000570	0	5	5		AGAP005833, AGAP005834, AGAP005835, AGAP005836, AGAP005837
OG0000571	0	5	5		AGAP006075, AGAP006076, AGAP006077, AGAP006078, AGAP006079
OG0000572	0	5	5		AGAP006422, AGAP006423, AGAP006424, AGAP006425, AGAP006426
OG0000573	0	5	5		AGAP006440, AGAP029154, AGAP029172, AGAP029226, AGAP029228
OG0000574	0	5	5		AGAP006587, AGAP006588, AGAP028458, AGAP028665, AGAP028666
OG0000575	0	5	5		AGAP006707, AGAP006709, AGAP006710, AGAP006711, AGAP012778
OG0000576	0	5	5		AGAP007343, AGAP007344, AGAP007345, AGAP007346, AGAP007347
OG0000577	0	5	5		AGAP007513, AGAP007514, AGAP007515, AGAP007516, AGAP007518
OG0000578	0	5	5		AGAP007906, AGAP008968, AGAP009328, AGAP009527, AGAP011482
OG0000579	0	5	5		AGAP008018, AGAP008019, AGAP008020, AGAP008022, AGAP012800
OG0000580	0	5	5		AGAP008454, AGAP012724, AGAP028081, AGAP028224, AGAP029416
OG0000581	0	5	5		AGAP008544, AGAP008545, AGAP009159, AGAP028059, AGAP028140
OG0000582	0	5	5		AGAP008561, AGAP008562, AGAP008566, AGAP028046, AGAP029079
OG0000583	0	5	5		AGAP009355, AGAP009357, AGAP029076, AGAP029081, AGAP029090
OG0000584	0	5	5		AGAP010362, AGAP029251, AGAP029275, AGAP029714, AGAP029715
OG0000585	0	5	5		AGAP011806, AGAP011807, AGAP011808, AGAP012308, AGAP029320
OG0000586	0	5	5		AGAP012745, AGAP013146, AGAP013188, AGAP013255, AGAP013393
OG0000587	3	1	4	AAEL000006, AAEL000025, AAEL000080	AGAP003350
OG0000588	4	0	4	AAEL000044, AAEL005694, AAEL007878, AAEL014995
OG0000589	2	2	4	AAEL000111, AAEL000146	AGAP012662, AGAP013231
OG0000590	3	1	4	AAEL000154, AAEL025874, AAEL027754	AGAP002476
OG0000591	2	2	4	AAEL000164, AAEL000213	AGAP001098, AGAP001116
OG0000592	2	2	4	AAEL000203, AAEL024571	AGAP010798, AGAP029080
OG0000593	2	2	4	AAEL000275, AAEL002846	AGAP010480, AGAP029537
OG0000594	1	3	4	AAEL000340	AGAP002138, AGAP002195, AGAP002197
OG0000595	2	2	4	AAEL000354, AAEL009951	AGAP009225, AGAP009945
OG0000596	3	1	4	AAEL000359, AAEL007385, AAEL010393	AGAP002465
OG0000597	2	2	4	AAEL000360, AAEL006899	AGAP007107, AGAP010239
OG0000598	1	3	4	AAEL000385	AGAP011039, AGAP011041, AGAP012503
OG0000599	3	1	4	AAEL000414, AAEL022929, AAEL026764	AGAP003871
OG0000600	3	1	4	AAEL000484, AAEL013718, AAEL027334	AGAP013270
OG0000601	3	1	4	AAEL000529, AAEL004503, AAEL020737	AGAP009431
OG0000602	2	2	4	AAEL000576, AAEL004992	AGAP009964, AGAP009965
OG0000603	2	2	4	AAEL000585, AAEL002613	AGAP007368, AGAP010469
OG0000604	2	2	4	AAEL000595, AAEL010395	AGAP001766, AGAP001769
OG0000605	2	2	4	AAEL000656, AAEL000661	AGAP012389, AGAP012411
OG0000606	2	2	4	AAEL000667, AAEL009524	AGAP002102, AGAP012401
OG0000607	2	2	4	AAEL000735, AAEL008574	AGAP029757, AGAP029758
OG0000608	4	0	4	AAEL000739, AAEL007875, AAEL020300, AAEL026650
OG0000609	3	1	4	AAEL000760, AAEL005064, AAEL006161	AGAP004148
OG0000610	2	2	4	AAEL000788, AAEL028229	AGAP003929, AGAP011870
OG0000611	3	1	4	AAEL000878, AAEL000914, AAEL029005	AGAP010902
OG0000612	2	2	4	AAEL000890, AAEL000896	AGAP010900, AGAP010901
OG0000613	1	3	4	AAEL000967	AGAP007628, AGAP012019, AGAP028580
OG0000614	1	3	4	AAEL001126	AGAP000071, AGAP000072, AGAP002488
OG0000615	3	1	4	AAEL001127, AAEL003432, AAEL020358	AGAP002494
OG0000616	2	2	4	AAEL001178, AAEL004885	AGAP004552, AGAP008649
OG0000617	1	3	4	AAEL001198	AGAP007836, AGAP007837, AGAP007838
OG0000618	2	2	4	AAEL001220, AAEL008610	AGAP028115, AGAP029647
OG0000619	2	2	4	AAEL001295, AAEL001323	AGAP009384, AGAP028142
OG0000620	3	1	4	AAEL001325, AAEL008286, AAEL023941	AGAP007312
OG0000621	3	1	4	AAEL001333, AAEL003179, AAEL027087	AGAP003462
OG0000622	2	2	4	AAEL001427, AAEL002416	AGAP012513, AGAP012514
OG0000623	2	2	4	AAEL001449, AAEL011805	AGAP003224, AGAP012820
OG0000624	2	2	4	AAEL001509, AAEL022364	AGAP011560, AGAP011561
OG0000625	2	2	4	AAEL001510, AAEL007110	AGAP007797, AGAP011813
OG0000626	3	1	4	AAEL001571, AAEL026323, AAEL027595	AGAP007615
OG0000627	4	0	4	AAEL001634, AAEL001650, AAEL001654, AAEL007591
OG0000628	2	2	4	AAEL001687, AAEL001697	AGAP005318, AGAP005319
OG0000629	3	1	4	AAEL001691, AAEL001699, AAEL009513	AGAP005317
OG0000630	2	2	4	AAEL001710, AAEL027778	AGAP008245, AGAP012478
OG0000631	3	1	4	AAEL001737, AAEL001747, AAEL007218	AGAP005984
OG0000632	4	0	4	AAEL001748, AAEL005568, AAEL005923, AAEL024622
OG0000633	2	2	4	AAEL001769, AAEL002083	AGAP004912, AGAP005652
OG0000634	1	3	4	AAEL001782	AGAP005059, AGAP005060, AGAP012612
OG0000635	3	1	4	AAEL001903, AAEL012551, AAEL027186	AGAP028000
OG0000636	1	3	4	AAEL001937	AGAP011531, AGAP012845, AGAP012893
OG0000637	2	2	4	AAEL001939, AAEL008112	AGAP011520, AGAP013527
OG0000638	4	0	4	AAEL001960, AAEL002005, AAEL002031, AAEL006827
OG0000639	1	3	4	AAEL002084	AGAP000738, AGAP000777, AGAP006449
OG0000640	2	2	4	AAEL002110, AAEL023763	AGAP003378, AGAP012750
OG0000641	2	2	4	AAEL002214, AAEL007458	AGAP000473, AGAP008490
OG0000642	3	1	4	AAEL002255, AAEL004847, AAEL014713	AGAP006788
OG0000643	4	0	4	AAEL002281, AAEL002298, AAEL002320, AAEL002828
OG0000644	3	1	4	AAEL002295, AAEL002307, AAEL005739	AGAP012425
OG0000645	2	2	4	AAEL002415, AAEL024419	AGAP003429, AGAP012744
OG0000646	4	0	4	AAEL002440, AAEL002458, AAEL022446, AAEL026802
OG0000647	3	1	4	AAEL002442, AAEL009056, AAEL012501	AGAP011847
OG0000648	4	0	4	AAEL002472, AAEL020416, AAEL023079, AAEL025914
OG0000649	2	2	4	AAEL002506, AAEL002538	AGAP000803, AGAP012447
OG0000650	2	2	4	AAEL002534, AAEL025362	AGAP000953, AGAP002395
OG0000651	2	2	4	AAEL002631, AAEL017067	AGAP010470, AGAP028037
OG0000652	2	2	4	AAEL002683, AAEL014493	AGAP007918, AGAP013758
OG0000653	2	2	4	AAEL002718, AAEL005618	AGAP001205, AGAP001748
OG0000654	2	2	4	AAEL002745, AAEL002754	AGAP000217, AGAP000218
OG0000655	1	3	4	AAEL002835	AGAP011389, AGAP011390, AGAP011391
OG0000656	3	1	4	AAEL002838, AAEL002840, AAEL002854	AGAP028519
OG0000657	2	2	4	AAEL002951, AAEL021665	AGAP002460, AGAP013297
OG0000658	2	2	4	AAEL002980, AAEL021837	AGAP005296, AGAP011637
OG0000659	2	2	4	AAEL002993, AAEL021617	AGAP004100, AGAP012837
OG0000660	2	2	4	AAEL002998, AAEL022096	AGAP002018, AGAP013401
OG0000661	2	2	4	AAEL003047, AAEL027482	AGAP000225, AGAP000228
OG0000662	3	1	4	AAEL003060, AAEL007602, AAEL009853	AGAP001190
OG0000663	2	2	4	AAEL003093, AAEL012497	AGAP007134, AGAP011848
OG0000664	3	1	4	AAEL003098, AAEL010366, AAEL029008	AGAP007028
OG0000665	2	2	4	AAEL003111, AAEL003115	AGAP011227, AGAP011229
OG0000666	1	3	4	AAEL003151	AGAP010176, AGAP012690, AGAP012822
OG0000667	3	1	4	AAEL003190, AAEL020406, AAEL027351	AGAP001717
OG0000668	2	2	4	AAEL003272, AAEL006749	AGAP006370, AGAP009876
OG0000669	2	2	4	AAEL003395, AAEL020435	AGAP002125, AGAP002126
OG0000670	2	2	4	AAEL003406, AAEL003430	AGAP011958, AGAP012364
OG0000671	1	3	4	AAEL003408	AGAP004899, AGAP009773, AGAP011947
OG0000672	2	2	4	AAEL003470, AAEL027684	AGAP010430, AGAP029282
OG0000673	2	2	4	AAEL003504, AAEL003506	AGAP001618, AGAP001619
OG0000674	2	2	4	AAEL003516, AAEL003527	AGAP008839, AGAP008840
OG0000675	2	2	4	AAEL003697, AAEL020823	AGAP001376, AGAP001377
OG0000676	2	2	4	AAEL003703, AAEL021570	AGAP000506, AGAP001333
OG0000677	2	2	4	AAEL003781, AAEL020960	AGAP001026, AGAP013181
OG0000678	1	3	4	AAEL003853	AGAP012716, AGAP029471, AGAP029636
OG0000679	2	2	4	AAEL003875, AAEL018031	AGAP000674, AGAP004438
OG0000680	2	2	4	AAEL003950, AAEL003968	AGAP010699, AGAP010700
OG0000681	1	3	4	AAEL003953	AGAP003005, AGAP013439, AGAP029469
OG0000682	2	2	4	AAEL003999, AAEL020652	AGAP007800, AGAP008976
OG0000683	2	2	4	AAEL004018, AAEL004031	AGAP002976, AGAP013216
OG0000684	1	3	4	AAEL004028	AGAP003786, AGAP003787, AGAP012882
OG0000685	3	1	4	AAEL004039, AAEL025042, AAEL026343	AGAP002967
OG0000686	3	1	4	AAEL004086, AAEL004095, AAEL004118	AGAP011053
OG0000687	1	3	4	AAEL004102	AGAP011051, AGAP011066, AGAP011068
OG0000688	3	1	4	AAEL004127, AAEL004137, AAEL021809	AGAP001951
OG0000689	2	2	4	AAEL004174, AAEL013504	AGAP005895, AGAP005896
OG0000690	2	2	4	AAEL004176, AAEL008678	AGAP004886, AGAP005829
OG0000691	2	2	4	AAEL004188, AAEL013257	AGAP013728, AGAP028199
OG0000692	3	1	4	AAEL004226, AAEL011292, AAEL012217	AGAP000885
OG0000693	2	2	4	AAEL004278, AAEL005737	AGAP010149, AGAP010150
OG0000694	1	3	4	AAEL004303	AGAP012605, AGAP029683, AGAP029684
OG0000695	2	2	4	AAEL004366, AAEL024667	AGAP003120, AGAP012726
OG0000696	3	1	4	AAEL004416, AAEL004586, AAEL027991	AGAP006511
OG0000697	1	3	4	AAEL004438	AGAP011150, AGAP012770, AGAP012865
OG0000698	1	3	4	AAEL004456	AGAP012856, AGAP013035, AGAP029379
OG0000699	3	1	4	AAEL004466, AAEL012763, AAEL027236	AGAP013290
OG0000700	2	2	4	AAEL004474, AAEL019668	AGAP003040, AGAP029462
OG0000701	2	2	4	AAEL004563, AAEL013966	AGAP001407, AGAP002996
OG0000702	3	1	4	AAEL004564, AAEL027515, AAEL028140	AGAP004497
OG0000703	2	2	4	AAEL004592, AAEL024570	AGAP006270, AGAP006510
OG0000704	3	1	4	AAEL004608, AAEL020745, AAEL023966	AGAP003438
OG0000705	2	2	4	AAEL004678, AAEL025454	AGAP013190, AGAP028501
OG0000706	2	2	4	AAEL004690, AAEL004694	AGAP003162, AGAP003164
OG0000707	3	1	4	AAEL004712, AAEL004735, AAEL025526	AGAP028225
OG0000708	2	2	4	AAEL004741, AAEL021132	AGAP008766, AGAP008767
OG0000709	3	1	4	AAEL004776, AAEL019993, AAEL019994	AGAP010097
OG0000710	2	2	4	AAEL004779, AAEL012008	AGAP008136, AGAP009996
OG0000711	2	2	4	AAEL004799, AAEL019765	AGAP002082, AGAP002083
OG0000712	2	2	4	AAEL004804, AAEL008330	AGAP010535, AGAP010537
OG0000713	4	0	4	AAEL004820, AAEL019930, AAEL019931, AAEL027090
OG0000714	2	2	4	AAEL004839, AAEL013531	AGAP006678, AGAP008002
OG0000715	3	1	4	AAEL004869, AAEL005717, AAEL026879	AGAP001555
OG0000716	2	2	4	AAEL004983, AAEL022855	AGAP000619, AGAP009992
OG0000717	2	2	4	AAEL005002, AAEL025111	AGAP010969, AGAP010970
OG0000718	2	2	4	AAEL005049, AAEL005515	AGAP000399, AGAP006668
OG0000719	2	2	4	AAEL005243, AAEL006071	AGAP002342, AGAP002832
OG0000720	3	1	4	AAEL005286, AAEL010074, AAEL024455	AGAP011127
OG0000721	3	1	4	AAEL005433, AAEL021183, AAEL028201	AGAP008706
OG0000722	3	1	4	AAEL005438, AAEL022095, AAEL026733	AGAP000552
OG0000723	3	1	4	AAEL005450, AAEL022228, AAEL026757	AGAP007833
OG0000724	3	1	4	AAEL005496, AAEL013756, AAEL026495	AGAP002624
OG0000725	1	3	4	AAEL005520	AGAP000401, AGAP005066, AGAP012656
OG0000726	1	3	4	AAEL005522	AGAP000400, AGAP001698, AGAP011579
OG0000727	3	1	4	AAEL005525, AAEL005526, AAEL024254	AGAP000894
OG0000728	1	3	4	AAEL005581	AGAP010621, AGAP012565, AGAP012626
OG0000729	3	1	4	AAEL005656, AAEL021838, AAEL026217	AGAP010147
OG0000730	2	2	4	AAEL005665, AAEL014078	AGAP006910, AGAP006911
OG0000731	2	2	4	AAEL005676, AAEL026165	AGAP006906, AGAP006907
OG0000732	3	1	4	AAEL005799, AAEL011758, AAEL025082	AGAP000462
OG0000733	2	2	4	AAEL005803, AAEL027285	AGAP000854, AGAP002881
OG0000734	1	3	4	AAEL005808	AGAP003692, AGAP003695, AGAP003926
OG0000735	4	0	4	AAEL005821, AAEL012099, AAEL015247, AAEL017244
OG0000736	3	1	4	AAEL005843, AAEL021854, AAEL026114	AGAP004672
OG0000737	2	2	4	AAEL005957, AAEL005969	AGAP011511, AGAP011512
OG0000738	1	3	4	AAEL005977	AGAP005721, AGAP028495, AGAP029332
OG0000739	1	3	4	AAEL006077	AGAP001773, AGAP001774, AGAP012781
OG0000740	2	2	4	AAEL006178, AAEL019506	AGAP001695, AGAP029662
OG0000741	4	0	4	AAEL006333, AAEL009968, AAEL011346, AAEL011348
OG0000742	2	2	4	AAEL006342, AAEL006354	AGAP011970, AGAP011972
OG0000743	3	1	4	AAEL006376, AAEL006382, AAEL006384	AGAP006485
OG0000744	2	2	4	AAEL006381, AAEL009111	AGAP004054, AGAP008487
OG0000745	1	3	4	AAEL006389	AGAP010645, AGAP012577, AGAP012900
OG0000746	2	2	4	AAEL006394, AAEL021507	AGAP011094, AGAP011095
OG0000747	4	0	4	AAEL006406, AAEL006423, AAEL007394, AAEL024303
OG0000748	2	2	4	AAEL006439, AAEL025729	AGAP000898, AGAP008228
OG0000749	3	1	4	AAEL006445, AAEL022222, AAEL023228	AGAP009280
OG0000750	3	1	4	AAEL006458, AAEL006467, AAEL006471	AGAP010499
OG0000751	2	2	4	AAEL006483, AAEL012067	AGAP001193, AGAP002643
OG0000752	3	1	4	AAEL006486, AAEL006863, AAEL023219	AGAP011771
OG0000753	3	1	4	AAEL006553, AAEL021322, AAEL024679	AGAP005431
OG0000754	1	3	4	AAEL006609	AGAP007038, AGAP009889, AGAP011502
OG0000755	2	2	4	AAEL006613, AAEL023544	AGAP000657, AGAP007945
OG0000756	3	1	4	AAEL006656, AAEL020095, AAEL025503	AGAP000095
OG0000757	2	2	4	AAEL006744, AAEL010932	AGAP003847, AGAP005406
OG0000758	2	2	4	AAEL006854, AAEL020314	AGAP028108, AGAP028157
OG0000759	2	2	4	AAEL006937, AAEL022508	AGAP006388, AGAP008672
OG0000760	3	1	4	AAEL006998, AAEL021420, AAEL028089	AGAP008674
OG0000761	3	1	4	AAEL007010, AAEL007024, AAEL021861	AGAP013511
OG0000762	3	1	4	AAEL007017, AAEL007026, AAEL024885	AGAP008668
OG0000763	2	2	4	AAEL007039, AAEL017056	AGAP006342, AGAP006343
OG0000764	1	3	4	AAEL007044	AGAP006920, AGAP029267, AGAP029305
OG0000765	2	2	4	AAEL007057, AAEL007926	AGAP011442, AGAP011443
OG0000766	2	2	4	AAEL007077, AAEL022194	AGAP003061, AGAP003064
OG0000767	3	1	4	AAEL007078, AAEL020187, AAEL022236	AGAP002340
OG0000768	3	1	4	AAEL007080, AAEL021382, AAEL021734	AGAP003687
OG0000769	2	2	4	AAEL007121, AAEL011716	AGAP011371, AGAP011373
OG0000770	2	2	4	AAEL007225, AAEL009881	AGAP003271, AGAP007675
OG0000771	2	2	4	AAEL007303, AAEL010826	AGAP003013, AGAP003597
OG0000772	2	2	4	AAEL007424, AAEL010661	AGAP005498, AGAP005504
OG0000773	1	3	4	AAEL007476	AGAP000355, AGAP011656, AGAP011657
OG0000774	2	2	4	AAEL007592, AAEL015137	AGAP001956, AGAP013106
OG0000775	2	2	4	AAEL007595, AAEL023585	AGAP002352, AGAP004319
OG0000776	3	1	4	AAEL007637, AAEL019921, AAEL024064	AGAP001783
OG0000777	2	2	4	AAEL007664, AAEL018352	AGAP000962, AGAP008588
OG0000778	2	2	4	AAEL007683, AAEL011603	AGAP010028, AGAP012922
OG0000779	3	1	4	AAEL007789, AAEL007793, AAEL010405	AGAP004358
OG0000780	3	1	4	AAEL007935, AAEL017450, AAEL024307	AGAP001117
OG0000781	2	2	4	AAEL007946, AAEL007962	AGAP009192, AGAP009193
OG0000782	2	2	4	AAEL008049, AAEL008052	AGAP011592, AGAP011599
OG0000783	2	2	4	AAEL008072, AAEL026806	AGAP000170, AGAP003231
OG0000784	3	1	4	AAEL008101, AAEL009987, AAEL023919	AGAP002475
OG0000785	2	2	4	AAEL008148, AAEL013179	AGAP001854, AGAP012898
OG0000786	2	2	4	AAEL008211, AAEL008213	AGAP007255, AGAP007266
OG0000787	2	2	4	AAEL008271, AAEL008275	AGAP029763, AGAP029764
OG0000788	3	1	4	AAEL008319, AAEL009158, AAEL029055	AGAP010217
OG0000789	3	1	4	AAEL008346, AAEL008350, AAEL023131	AGAP000876
OG0000790	2	2	4	AAEL008355, AAEL008359	AGAP013197, AGAP029340
OG0000791	2	2	4	AAEL008374, AAEL024950	AGAP000787, AGAP003133
OG0000792	3	1	4	AAEL008395, AAEL024654, AAEL025889	AGAP012152
OG0000793	2	2	4	AAEL008412, AAEL012845	AGAP000291, AGAP008539
OG0000794	2	2	4	AAEL008467, AAEL008468	AGAP000162, AGAP012897
OG0000795	1	3	4	AAEL008473	AGAP007584, AGAP029701, AGAP029702
OG0000796	1	3	4	AAEL008556	AGAP004833, AGAP012685, AGAP012699
OG0000797	3	1	4	AAEL008587, AAEL024694, AAEL024730	AGAP001478
OG0000798	2	2	4	AAEL008600, AAEL008609	AGAP008370, AGAP008371
OG0000799	2	2	4	AAEL008622, AAEL008634	AGAP009460, AGAP029555
OG0000800	2	2	4	AAEL008652, AAEL008655	AGAP001961, AGAP001962
OG0000801	1	3	4	AAEL008658	AGAP028015, AGAP028028, AGAP028064
OG0000802	4	0	4	AAEL008698, AAEL008702, AAEL012590, AAEL012664
OG0000803	3	1	4	AAEL008779, AAEL026277, AAEL027261	AGAP004367
OG0000804	1	3	4	AAEL008863	AGAP012520, AGAP028502, AGAP029481
OG0000805	2	2	4	AAEL008958, AAEL010565	AGAP000662, AGAP005804
OG0000806	2	2	4	AAEL009017, AAEL025929	AGAP000761, AGAP000888
OG0000807	2	2	4	AAEL009039, AAEL011650	AGAP001267, AGAP003035
OG0000808	3	1	4	AAEL009054, AAEL017513, AAEL027056	AGAP028002
OG0000809	1	3	4	AAEL009120	AGAP008203, AGAP008204, AGAP012855
OG0000810	2	2	4	AAEL009275, AAEL019824	AGAP003114, AGAP011166
OG0000811	3	1	4	AAEL009553, AAEL009555, AAEL009556	AGAP007197
OG0000812	2	2	4	AAEL009749, AAEL009753	AGAP010370, AGAP010372
OG0000813	3	1	4	AAEL009822, AAEL025827, AAEL027822	AGAP005034
OG0000814	1	3	4	AAEL009880	AGAP001793, AGAP012456, AGAP012876
OG0000815	2	2	4	AAEL009894, AAEL012911	AGAP005744, AGAP010675
OG0000816	2	2	4	AAEL009948, AAEL014080	AGAP003578, AGAP009944
OG0000817	2	2	4	AAEL009952, AAEL010076	AGAP029278, AGAP029358
OG0000818	3	1	4	AAEL009978, AAEL024552, AAEL026121	AGAP006698
OG0000819	1	3	4	AAEL010090	AGAP004964, AGAP012779, AGAP012902
OG0000820	3	1	4	AAEL010132, AAEL012086, AAEL024406	AGAP007037
OG0000821	3	1	4	AAEL010166, AAEL014441, AAEL027157	AGAP003767
OG0000822	3	1	4	AAEL010226, AAEL021547, AAEL024827	AGAP008814
OG0000823	2	2	4	AAEL010318, AAEL027737	AGAP011091, AGAP011092
OG0000824	2	2	4	AAEL010403, AAEL027938	AGAP002456, AGAP004593
OG0000825	2	2	4	AAEL010433, AAEL019932	AGAP004280, AGAP010324
OG0000826	2	2	4	AAEL010478, AAEL010479	AGAP003493, AGAP003495
OG0000827	2	2	4	AAEL010557, AAEL023059	AGAP004907, AGAP013406
OG0000828	2	2	4	AAEL010568, AAEL022181	AGAP000575, AGAP012471
OG0000829	1	3	4	AAEL010721	AGAP001470, AGAP003880, AGAP013454
OG0000830	4	0	4	AAEL010775, AAEL013198, AAEL019948, AAEL019949
OG0000831	2	2	4	AAEL011025, AAEL021342	AGAP000721, AGAP013199
OG0000832	2	2	4	AAEL011055, AAEL026089	AGAP005908, AGAP007565
OG0000833	2	2	4	AAEL011123, AAEL021416	AGAP004266, AGAP012809
OG0000834	2	2	4	AAEL011129, AAEL011130	AGAP003581, AGAP003582
OG0000835	2	2	4	AAEL011184, AAEL019717	AGAP003586, AGAP013333
OG0000836	2	2	4	AAEL011221, AAEL020739	AGAP005528, AGAP005529
OG0000837	3	1	4	AAEL011419, AAEL011428, AAEL027486	AGAP029265
OG0000838	1	3	4	AAEL011543	AGAP011475, AGAP012881, AGAP029295
OG0000839	3	1	4	AAEL011547, AAEL011550, AAEL011555	AGAP010764
OG0000840	2	2	4	AAEL011563, AAEL013466	AGAP002272, AGAP028730
OG0000841	3	1	4	AAEL011677, AAEL014662, AAEL019722	AGAP008557
OG0000842	3	1	4	AAEL011731, AAEL021786, AAEL025949	AGAP010351
OG0000843	3	1	4	AAEL011768, AAEL011771, AAEL025037	AGAP028399
OG0000844	3	1	4	AAEL011889, AAEL011891, AAEL016975	AGAP009121
OG0000845	2	2	4	AAEL011923, AAEL022536	AGAP028679, AGAP028680
OG0000846	1	3	4	AAEL011931	AGAP001742, AGAP002650, AGAP013321
OG0000847	2	2	4	AAEL012058, AAEL014635	AGAP008023, AGAP008025
OG0000848	2	2	4	AAEL012128, AAEL012131	AGAP010562, AGAP028613
OG0000849	2	2	4	AAEL012153, AAEL012157	AGAP007676, AGAP007677
OG0000850	2	2	4	AAEL012350, AAEL022081	AGAP003500, AGAP003501
OG0000851	2	2	4	AAEL012356, AAEL012920	AGAP010486, AGAP012268
OG0000852	2	2	4	AAEL012417, AAEL025613	AGAP001441, AGAP013284
OG0000853	1	3	4	AAEL012437	AGAP003302, AGAP004243, AGAP012952
OG0000854	3	1	4	AAEL012447, AAEL020367, AAEL027037	AGAP008996
OG0000855	3	1	4	AAEL012472, AAEL014967, AAEL027557	AGAP010258
OG0000856	1	3	4	AAEL012691	AGAP001550, AGAP001965, AGAP013403
OG0000857	3	1	4	AAEL012711, AAEL012713, AAEL026876	AGAP000572
OG0000858	3	1	4	AAEL012777, AAEL012782, AAEL023505	AGAP004859
OG0000859	1	3	4	AAEL012839	AGAP002074, AGAP002615, AGAP011844
OG0000860	3	1	4	AAEL012859, AAEL012864, AAEL012867	AGAP004529
OG0000861	3	1	4	AAEL012860, AAEL012863, AAEL013851	AGAP004528
OG0000862	1	3	4	AAEL012964	AGAP001028, AGAP004281, AGAP029321
OG0000863	2	2	4	AAEL013153, AAEL013155	AGAP009014, AGAP029147
OG0000864	1	3	4	AAEL013217	AGAP004951, AGAP004971, AGAP004974
OG0000865	3	1	4	AAEL013218, AAEL017458, AAEL024164	AGAP012955
OG0000866	2	2	4	AAEL013249, AAEL020525	AGAP002502, AGAP028093
OG0000867	3	1	4	AAEL013281, AAEL013283, AAEL013284	AGAP006385
OG0000868	2	2	4	AAEL013600, AAEL025607	AGAP000032, AGAP000307
OG0000869	3	1	4	AAEL013603, AAEL014627, AAEL014840	AGAP005166
OG0000870	3	1	4	AAEL013875, AAEL013917, AAEL013918	AGAP007209
OG0000871	2	2	4	AAEL013974, AAEL020316	AGAP005789, AGAP005864
OG0000872	1	3	4	AAEL014050	AGAP009926, AGAP009927, AGAP012737
OG0000873	4	0	4	AAEL014137, AAEL014139, AAEL014140, AAEL022822
OG0000874	2	2	4	AAEL014138, AAEL014141	AGAP009213, AGAP009221
OG0000875	1	3	4	AAEL014262	AGAP003650, AGAP012611, AGAP012799
OG0000876	2	2	4	AAEL014277, AAEL015111	AGAP004647, AGAP004648
OG0000877	2	2	4	AAEL014303, AAEL017095	AGAP002090, AGAP011916
OG0000878	3	1	4	AAEL014377, AAEL020504, AAEL023570	AGAP003213
OG0000879	2	2	4	AAEL014382, AAEL022136	AGAP005334, AGAP006267
OG0000880	2	2	4	AAEL014384, AAEL029028	AGAP010707, AGAP010709
OG0000881	2	2	4	AAEL014435, AAEL021812	AGAP003758, AGAP003766
OG0000882	4	0	4	AAEL014437, AAEL014438, AAEL020644, AAEL024413
OG0000883	3	1	4	AAEL014767, AAEL023615, AAEL024096	AGAP006362
OG0000884	2	2	4	AAEL014804, AAEL024823	AGAP007075, AGAP012821
OG0000885	1	3	4	AAEL014945	AGAP004084, AGAP004307, AGAP012563
OG0000886	1	3	4	AAEL015631	AGAP003832, AGAP003833, AGAP012923
OG0000887	2	2	4	AAEL017025, AAEL027439	AGAP009758, AGAP027993
OG0000888	2	2	4	AAEL017096, AAEL017301	AGAP003541, AGAP007406
OG0000889	2	2	4	AAEL017280, AAEL019892	AGAP001786, AGAP005156
OG0000890	2	2	4	AAEL017424, AAEL021291	AGAP010981, AGAP010982
OG0000891	1	3	4	AAEL018153	AGAP010286, AGAP012603, AGAP012633
OG0000892	2	2	4	AAEL018183, AAEL024668	AGAP009708, AGAP009709
OG0000893	1	3	4	AAEL018263	AGAP000835, AGAP004972, AGAP004973
OG0000894	2	2	4	AAEL018316, AAEL024199	AGAP005001, AGAP005002
OG0000895	3	1	4	AAEL019499, AAEL021264, AAEL024780	AGAP002942
OG0000896	2	2	4	AAEL019515, AAEL021312	AGAP010646, AGAP012576
OG0000897	2	2	4	AAEL019550, AAEL019616	AGAP007847, AGAP029580
OG0000898	1	3	4	AAEL019566	AGAP001790, AGAP002986, AGAP003062
OG0000899	2	2	4	AAEL019593, AAEL027018	AGAP007493, AGAP013547
OG0000900	1	3	4	AAEL019599	AGAP008813, AGAP029398, AGAP029406
OG0000901	3	1	4	AAEL019600, AAEL022282, AAEL023044	AGAP001645
OG0000902	2	2	4	AAEL019702, AAEL024144	AGAP010184, AGAP010186
OG0000903	2	2	4	AAEL019797, AAEL019798	AGAP003354, AGAP013192
OG0000904	2	2	4	AAEL019801, AAEL025051	AGAP029514, AGAP029532
OG0000905	3	1	4	AAEL019812, AAEL021944, AAEL023569	AGAP011049
OG0000906	3	1	4	AAEL019929, AAEL020820, AAEL021641	AGAP010518
OG0000907	2	2	4	AAEL019954, AAEL019955	AGAP010344, AGAP029464
OG0000908	1	3	4	AAEL019988	AGAP001498, AGAP001499, AGAP004930
OG0000909	4	0	4	AAEL020142, AAEL021309, AAEL025615, AAEL026358
OG0000910	3	1	4	AAEL020173, AAEL020349, AAEL025927	AGAP008913
OG0000911	2	2	4	AAEL020299, AAEL023374	AGAP010242, AGAP010245
OG0000912	4	0	4	AAEL020335, AAEL023161, AAEL023535, AAEL025251
OG0000913	4	0	4	AAEL020346, AAEL022957, AAEL026431, AAEL026853
OG0000914	4	0	4	AAEL020568, AAEL022314, AAEL024248, AAEL026451
OG0000915	1	3	4	AAEL020585	AGAP007414, AGAP007557, AGAP007558
OG0000916	4	0	4	AAEL020731, AAEL021549, AAEL023359, AAEL023739
OG0000917	3	1	4	AAEL020758, AAEL023277, AAEL027207	AGAP003340
OG0000918	3	1	4	AAEL020781, AAEL024786, AAEL024800	AGAP000626
OG0000919	2	2	4	AAEL020811, AAEL024863	AGAP013111, AGAP013222
OG0000920	3	1	4	AAEL021202, AAEL022782, AAEL026566	AGAP007792
OG0000921	3	1	4	AAEL021335, AAEL024693, AAEL027155	AGAP001084
OG0000922	3	1	4	AAEL021402, AAEL024170, AAEL025488	AGAP003678
OG0000923	3	1	4	AAEL021465, AAEL025221, AAEL025806	AGAP002367
OG0000924	4	0	4	AAEL021550, AAEL022192, AAEL022266, AAEL025095
OG0000925	2	2	4	AAEL021574, AAEL023730	AGAP010358, AGAP010359
OG0000926	3	1	4	AAEL021767, AAEL022608, AAEL024321	AGAP003118
OG0000927	4	0	4	AAEL021981, AAEL023002, AAEL024072, AAEL027723
OG0000928	4	0	4	AAEL022030, AAEL023472, AAEL023598, AAEL024774
OG0000929	3	1	4	AAEL022214, AAEL023190, AAEL024558	AGAP002989
OG0000930	2	2	4	AAEL022398, AAEL024450	AGAP011743, AGAP011967
OG0000931	2	2	4	AAEL022431, AAEL023102	AGAP007137, AGAP010342
OG0000932	2	2	4	AAEL022657, AAEL026213	AGAP000629, AGAP013491
OG0000933	1	3	4	AAEL022773	AGAP007964, AGAP007965, AGAP013745
OG0000934	2	2	4	AAEL023040, AAEL027478	AGAP000361, AGAP010269
OG0000935	4	0	4	AAEL023200, AAEL024344, AAEL026385, AAEL027828
OG0000936	3	1	4	AAEL023595, AAEL027013, AAEL027839	AGAP001721
OG0000937	3	1	4	AAEL023782, AAEL026015, AAEL028161	AGAP002371
OG0000938	2	2	4	AAEL024089, AAEL026668	AGAP000668, AGAP003137
OG0000939	3	1	4	AAEL024104, AAEL025458, AAEL026110	AGAP008899
OG0000940	3	1	4	AAEL024436, AAEL026534, AAEL026589	AGAP002951
OG0000941	2	2	4	AAEL024447, AAEL028006	AGAP003170, AGAP003172
OG0000942	2	2	4	AAEL025125, AAEL027242	AGAP004222, AGAP004223
OG0000943	3	1	4	AAEL025298, AAEL026623, AAEL028110	AGAP029112
OG0000944	2	2	4	AAEL025517, AAEL025664	AGAP003332, AGAP029243
OG0000945	2	2	4	AAEL025692, AAEL026618	AGAP009575, AGAP012921
OG0000946	2	2	4	AAEL026387, AAEL027545	AGAP007077, AGAP007078
OG0000947	2	2	4	AAEL027566, AAEL027715	AGAP008247, AGAP012476
OG0000948	1	3	4	AAEL027589	AGAP000628, AGAP012340, AGAP013360
OG0000949	2	2	4	AAEL029038, AAEL029046	AGAP000693, AGAP006722
OG0000950	1	3	4	AAEL029048	AGAP012613, AGAP012740, AGAP012926
OG0000951	0	4	4		AGAP000186, AGAP004515, AGAP013399, AGAP029440
OG0000952	0	4	4		AGAP000916, AGAP000918, AGAP000919, AGAP000920
OG0000953	0	4	4		AGAP001012, AGAP002044, AGAP002045, AGAP002046
OG0000954	0	4	4		AGAP001078, AGAP001079, AGAP004894, AGAP013064
OG0000955	0	4	4		AGAP002894, AGAP008217, AGAP008218, AGAP008219
OG0000956	0	4	4		AGAP003626, AGAP003627, AGAP012946, AGAP013221
OG0000957	0	4	4		AGAP004354, AGAP004355, AGAP004356, AGAP004357
OG0000958	0	4	4		AGAP004680, AGAP028564, AGAP028566, AGAP028567
OG0000959	0	4	4		AGAP005022, AGAP005027, AGAP005105, AGAP029484
OG0000960	0	4	4		AGAP005264, AGAP005265, AGAP005266, AGAP011193
OG0000961	0	4	4		AGAP005547, AGAP005548, AGAP007158, AGAP007159
OG0000962	0	4	4		AGAP005656, AGAP005657, AGAP005660, AGAP012667
OG0000963	0	4	4		AGAP005951, AGAP006434, AGAP010468, AGAP028162
OG0000964	0	4	4		AGAP005966, AGAP005967, AGAP005968, AGAP005969
OG0000965	0	4	4		AGAP006523, AGAP006524, AGAP006525, AGAP013045
OG0000966	0	4	4		AGAP007170, AGAP007171, AGAP013299, AGAP013485
OG0000967	0	4	4		AGAP007318, AGAP007319, AGAP007320, AGAP007321
OG0000968	0	4	4		AGAP008599, AGAP009778, AGAP009779, AGAP009815
OG0000969	0	4	4		AGAP009352, AGAP012681, AGAP012682, AGAP013718
OG0000970	0	4	4		AGAP009363, AGAP009374, AGAP009375, AGAP029144
OG0000971	0	4	4		AGAP009540, AGAP009541, AGAP012263, AGAP012649
OG0000972	0	4	4		AGAP009917, AGAP009918, AGAP029826, AGAP029827
OG0000973	0	4	4		AGAP010057, AGAP010169, AGAP012581, AGAP028032
OG0000974	0	4	4		AGAP010323, AGAP012450, AGAP012588, AGAP012715
OG0000975	0	4	4		AGAP010934, AGAP011697, AGAP029253, AGAP029349
OG0000976	0	4	4		AGAP012034, AGAP012843, AGAP028007, AGAP028167
OG0000977	0	4	4		AGAP012968, AGAP013151, AGAP013203, AGAP028472
OG0000978	1	2	3	AAEL000008	AGAP003346, AGAP012877
OG0000979	1	2	3	AAEL000012	AGAP003259, AGAP012713
OG0000980	1	2	3	AAEL000038	AGAP002270, AGAP003252
OG0000981	1	2	3	AAEL000051	AGAP004433, AGAP012714
OG0000982	2	1	3	AAEL000081, AAEL020741	AGAP006205
OG0000983	1	2	3	AAEL000102	AGAP003514, AGAP012746
OG0000984	2	1	3	AAEL000108, AAEL023987	AGAP001952
OG0000985	2	1	3	AAEL000109, AAEL025680	AGAP003331
OG0000986	1	2	3	AAEL000124	AGAP006080, AGAP006081
OG0000987	1	2	3	AAEL000151	AGAP005493, AGAP029819
OG0000988	1	2	3	AAEL000159	AGAP003200, AGAP012981
OG0000989	1	2	3	AAEL000186	AGAP010447, AGAP010449
OG0000990	1	2	3	AAEL000193	AGAP012481, AGAP012610
OG0000991	1	2	3	AAEL000217	AGAP003201, AGAP003202
OG0000992	2	1	3	AAEL000226, AAEL013852	AGAP004849
OG0000993	2	1	3	AAEL000243, AAEL021776	AGAP000360
OG0000994	1	2	3	AAEL000245	AGAP004838, AGAP012695
OG0000995	1	2	3	AAEL000260	AGAP010348, AGAP012593
OG0000996	1	2	3	AAEL000272	AGAP012137, AGAP012853
OG0000997	2	1	3	AAEL000287, AAEL003471	AGAP004764
OG0000998	1	2	3	AAEL000293	AGAP005672, AGAP012831
OG0000999	2	1	3	AAEL000305, AAEL001526	AGAP029534
OG0001000	2	1	3	AAEL000337, AAEL003529	AGAP008845
OG0001001	2	1	3	AAEL000342, AAEL006957	AGAP007237
OG0001002	1	2	3	AAEL000386	AGAP011036, AGAP012631
OG0001003	2	1	3	AAEL000397, AAEL027318	AGAP012403
OG0001004	2	1	3	AAEL000399, AAEL027275	AGAP002099
OG0001005	2	1	3	AAEL000404, AAEL025524	AGAP002988
OG0001006	1	2	3	AAEL000405	AGAP000461, AGAP011034
OG0001007	1	2	3	AAEL000416	AGAP000244, AGAP003550
OG0001008	2	1	3	AAEL000427, AAEL026240	AGAP002084
OG0001009	2	1	3	AAEL000432, AAEL013951	AGAP009639
OG0001010	2	1	3	AAEL000440, AAEL023005	AGAP003548
OG0001011	2	1	3	AAEL000445, AAEL027802	AGAP002085
OG0001012	3	0	3	AAEL000449, AAEL024465, AAEL027295
OG0001013	2	1	3	AAEL000459, AAEL021314	AGAP003549
OG0001014	2	1	3	AAEL000460, AAEL020197	AGAP013167
OG0001015	3	0	3	AAEL000496, AAEL000507, AAEL017467
OG0001016	2	1	3	AAEL000504, AAEL005971	AGAP028523
OG0001017	2	1	3	AAEL000508, AAEL023956	AGAP001554
OG0001018	1	2	3	AAEL000590	AGAP001609, AGAP012751
OG0001019	2	1	3	AAEL000616, AAEL003045	AGAP000226
OG0001020	1	2	3	AAEL000670	AGAP012394, AGAP012395
OG0001021	2	1	3	AAEL000694, AAEL024509	AGAP013052
OG0001022	2	1	3	AAEL000704, AAEL010851	AGAP007942
OG0001023	1	2	3	AAEL000715	AGAP029476, AGAP029663
OG0001024	1	2	3	AAEL000716	AGAP004371, AGAP012860
OG0001025	3	0	3	AAEL000726, AAEL000749, AAEL028175
OG0001026	2	1	3	AAEL000729, AAEL019841	AGAP006656
OG0001027	1	2	3	AAEL000751	AGAP007337, AGAP007338
OG0001028	1	2	3	AAEL000757	AGAP007793, AGAP007794
OG0001029	2	1	3	AAEL000762, AAEL029049	AGAP011117
OG0001030	3	0	3	AAEL000769, AAEL001889, AAEL027050
OG0001031	2	1	3	AAEL000781, AAEL005040	AGAP011871
OG0001032	2	1	3	AAEL000795, AAEL003888	AGAP001971
OG0001033	2	1	3	AAEL000803, AAEL011405	AGAP010422
OG0001034	1	2	3	AAEL000810	AGAP002748, AGAP029244
OG0001035	2	1	3	AAEL000825, AAEL020913	AGAP002603
OG0001036	2	1	3	AAEL000849, AAEL027279	AGAP002601
OG0001037	2	1	3	AAEL000852, AAEL022708	AGAP013296
OG0001038	2	1	3	AAEL000853, AAEL026416	AGAP002602
OG0001039	2	1	3	AAEL000859, AAEL000861	AGAP029724
OG0001040	1	2	3	AAEL000937	AGAP010603, AGAP010605
OG0001041	2	1	3	AAEL000940, AAEL022151	AGAP010595
OG0001042	2	1	3	AAEL000947, AAEL026893	AGAP028143
OG0001043	2	1	3	AAEL000950, AAEL024591	AGAP010572
OG0001044	1	2	3	AAEL000951	AGAP010612, AGAP010613
OG0001045	2	1	3	AAEL000952, AAEL022371	AGAP010574
OG0001046	2	1	3	AAEL000961, AAEL007879	AGAP011897
OG0001047	2	1	3	AAEL000963, AAEL021108	AGAP010573
OG0001048	2	1	3	AAEL000964, AAEL028134	AGAP009822
OG0001049	2	1	3	AAEL001020, AAEL001022	AGAP001501
OG0001050	2	1	3	AAEL001061, AAEL026530	AGAP004164
OG0001051	1	2	3	AAEL001065	AGAP003667, AGAP012642
OG0001052	2	1	3	AAEL001101, AAEL010359	AGAP012005
OG0001053	2	1	3	AAEL001162, AAEL021364	AGAP009620
OG0001054	2	1	3	AAEL001176, AAEL025170	AGAP009619
OG0001055	2	1	3	AAEL001182, AAEL020244	AGAP008652
OG0001056	2	1	3	AAEL001191, AAEL020438	AGAP010204
OG0001057	1	2	3	AAEL001195	AGAP013239, AGAP013450
OG0001058	2	1	3	AAEL001199, AAEL020222	AGAP009702
OG0001059	3	0	3	AAEL001221, AAEL001224, AAEL026167
OG0001060	1	2	3	AAEL001281	AGAP006115, AGAP006968
OG0001061	2	1	3	AAEL001289, AAEL020619	AGAP000046
OG0001062	1	2	3	AAEL001301	AGAP009379, AGAP009380
OG0001063	1	2	3	AAEL001304	AGAP009399, AGAP009400
OG0001064	1	2	3	AAEL001305	AGAP009387, AGAP012674
OG0001065	1	2	3	AAEL001308	AGAP009364, AGAP009376
OG0001066	1	2	3	AAEL001316	AGAP009383, AGAP009386
OG0001067	3	0	3	AAEL001318, AAEL008132, AAEL026609
OG0001068	2	1	3	AAEL001352, AAEL022991	AGAP001298
OG0001069	2	1	3	AAEL001358, AAEL023926	AGAP007313
OG0001070	2	1	3	AAEL001372, AAEL008952	AGAP005881
OG0001071	2	1	3	AAEL001381, AAEL004710	AGAP008926
OG0001072	2	1	3	AAEL001387, AAEL022805	AGAP005886
OG0001073	1	2	3	AAEL001416	AGAP007422, AGAP028442
OG0001074	1	2	3	AAEL001425	AGAP007402, AGAP007405
OG0001075	2	1	3	AAEL001426, AAEL023408	AGAP007399
OG0001076	2	1	3	AAEL001434, AAEL023310	AGAP007525
OG0001077	1	2	3	AAEL001446	AGAP000633, AGAP005309
OG0001078	1	2	3	AAEL001448	AGAP000595, AGAP000596
OG0001079	3	0	3	AAEL001455, AAEL015285, AAEL027220
OG0001080	1	2	3	AAEL001458	AGAP006169, AGAP006328
OG0001081	1	2	3	AAEL001464	AGAP010616, AGAP012469
OG0001082	2	1	3	AAEL001493, AAEL020526	AGAP007849
OG0001083	3	0	3	AAEL001508, AAEL004667, AAEL004672
OG0001084	2	1	3	AAEL001514, AAEL002623	AGAP010467
OG0001085	2	1	3	AAEL001522, AAEL022416	AGAP011553
OG0001086	3	0	3	AAEL001543, AAEL008471, AAEL021739
OG0001087	1	2	3	AAEL001561	AGAP007609, AGAP007610
OG0001088	1	2	3	AAEL001562	AGAP001680, AGAP007595
OG0001089	2	1	3	AAEL001566, AAEL024332	AGAP003702
OG0001090	2	1	3	AAEL001594, AAEL010287	AGAP012007
OG0001091	2	1	3	AAEL001604, AAEL007559	AGAP008775
OG0001092	1	2	3	AAEL001625	AGAP010066, AGAP029419
OG0001093	1	2	3	AAEL001646	AGAP007818, AGAP028144
OG0001094	1	2	3	AAEL001677	AGAP006145, AGAP006146
OG0001095	2	1	3	AAEL001682, AAEL027289	AGAP006117
OG0001096	2	1	3	AAEL001683, AAEL001704	AGAP006148
OG0001097	2	1	3	AAEL001686, AAEL001694	AGAP005315
OG0001098	2	1	3	AAEL001690, AAEL013040	AGAP005310
OG0001099	1	2	3	AAEL001707	AGAP008246, AGAP012477
OG0001100	1	2	3	AAEL001715	AGAP008249, AGAP012475
OG0001101	1	2	3	AAEL001751	AGAP005056, AGAP012763
OG0001102	1	2	3	AAEL001761	AGAP005050, AGAP012826
OG0001103	1	2	3	AAEL001764	AGAP005051, AGAP012825
OG0001104	1	2	3	AAEL001776	AGAP007058, AGAP013373
OG0001105	2	1	3	AAEL001797, AAEL022985	AGAP009019
OG0001106	2	1	3	AAEL001810, AAEL026493	AGAP009020
OG0001107	2	1	3	AAEL001844, AAEL020195	AGAP006208
OG0001108	2	1	3	AAEL001846, AAEL002000	AGAP029691
OG0001109	2	1	3	AAEL001855, AAEL001863	AGAP029692
OG0001110	1	2	3	AAEL001856	AGAP010136, AGAP010137
OG0001111	2	1	3	AAEL001875, AAEL020591	AGAP010138
OG0001112	2	1	3	AAEL001877, AAEL011784	AGAP003191
OG0001113	2	1	3	AAEL001886, AAEL003456	AGAP011877
OG0001114	2	1	3	AAEL001902, AAEL010951	AGAP002425
OG0001115	2	1	3	AAEL001909, AAEL025197	AGAP009152
OG0001116	2	1	3	AAEL001913, AAEL020754	AGAP009156
OG0001117	3	0	3	AAEL001949, AAEL020802, AAEL020902
OG0001118	2	1	3	AAEL001952, AAEL023816	AGAP011521
OG0001119	2	1	3	AAEL001962, AAEL021869	AGAP008048
OG0001120	3	0	3	AAEL001975, AAEL002028, AAEL002034
OG0001121	3	0	3	AAEL001989, AAEL001994, AAEL002003
OG0001122	2	1	3	AAEL001992, AAEL029012	AGAP008017
OG0001123	2	1	3	AAEL002006, AAEL024597	AGAP013736
OG0001124	2	1	3	AAEL002036, AAEL010315	AGAP011078
OG0001125	3	0	3	AAEL002043, AAEL004870, AAEL026706
OG0001126	1	2	3	AAEL002048	AGAP000735, AGAP002294
OG0001127	1	2	3	AAEL002049	AGAP005655, AGAP012873
OG0001128	2	1	3	AAEL002068, AAEL021392	AGAP008086
OG0001129	1	2	3	AAEL002088	AGAP002818, AGAP002820
OG0001130	2	1	3	AAEL002109, AAEL007259	AGAP012271
OG0001131	1	2	3	AAEL002124	AGAP002811, AGAP002813
OG0001132	1	2	3	AAEL002139	AGAP001031, AGAP008972
OG0001133	2	1	3	AAEL002157, AAEL003018	AGAP003930
OG0001134	1	2	3	AAEL002163	AGAP000704, AGAP009984
OG0001135	2	1	3	AAEL002170, AAEL012929	AGAP009029
OG0001136	1	2	3	AAEL002175	AGAP001032, AGAP012224
OG0001137	2	1	3	AAEL002178, AAEL012075	AGAP000622
OG0001138	1	2	3	AAEL002232	AGAP008481, AGAP029408
OG0001139	2	1	3	AAEL002248, AAEL027046	AGAP006446
OG0001140	1	2	3	AAEL002269	AGAP005944, AGAP005945
OG0001141	2	1	3	AAEL002270, AAEL024137	AGAP010341
OG0001142	1	2	3	AAEL002287	AGAP000591, AGAP002069
OG0001143	2	1	3	AAEL002292, AAEL002313	AGAP010943
OG0001144	2	1	3	AAEL002318, AAEL020455	AGAP010728
OG0001145	2	1	3	AAEL002387, AAEL025830	AGAP009811
OG0001146	2	1	3	AAEL002389, AAEL020851	AGAP009816
OG0001147	2	1	3	AAEL002395, AAEL021031	AGAP009936
OG0001148	2	1	3	AAEL002404, AAEL010923	AGAP005763
OG0001149	1	2	3	AAEL002406	AGAP010004, AGAP012644
OG0001150	1	2	3	AAEL002412	AGAP004384, AGAP012507
OG0001151	2	1	3	AAEL002417, AAEL026967	AGAP002350
OG0001152	2	1	3	AAEL002427, AAEL026436	AGAP004233
OG0001153	2	1	3	AAEL002433, AAEL024815	AGAP003081
OG0001154	1	2	3	AAEL002435	AGAP001073, AGAP003286
OG0001155	2	1	3	AAEL002450, AAEL021759	AGAP000391
OG0001156	1	2	3	AAEL002455	AGAP000025, AGAP001360
OG0001157	2	1	3	AAEL002456, AAEL026546	AGAP002610
OG0001158	2	1	3	AAEL002463, AAEL021792	AGAP005155
OG0001159	1	2	3	AAEL002508	AGAP000616, AGAP011557
OG0001160	2	1	3	AAEL002510, AAEL025146	AGAP001065
OG0001161	1	2	3	AAEL002541	AGAP001628, AGAP013268
OG0001162	2	1	3	AAEL002543, AAEL023018	AGAP004068
OG0001163	2	1	3	AAEL002577, AAEL002632	AGAP011782
OG0001164	2	1	3	AAEL002588, AAEL011335	AGAP028003
OG0001165	2	1	3	AAEL002591, AAEL002605	AGAP012322
OG0001166	2	1	3	AAEL002597, AAEL023576	AGAP011797
OG0001167	2	1	3	AAEL002602, AAEL011967	AGAP004261
OG0001168	2	1	3	AAEL002615, AAEL022118	AGAP012317
OG0001169	2	1	3	AAEL002622, AAEL028210	AGAP006363
OG0001170	2	1	3	AAEL002654, AAEL004205	AGAP008752
OG0001171	2	1	3	AAEL002689, AAEL010639	AGAP010199
OG0001172	2	1	3	AAEL002742, AAEL009989	AGAP013063
OG0001173	2	1	3	AAEL002757, AAEL006186	AGAP003243
OG0001174	1	2	3	AAEL002775	AGAP004413, AGAP004427
OG0001175	2	1	3	AAEL002815, AAEL022913	AGAP002913
OG0001176	1	2	3	AAEL002816	AGAP003942, AGAP004061
OG0001177	1	2	3	AAEL002831	AGAP012080, AGAP012083
OG0001178	2	1	3	AAEL002833, AAEL011167	AGAP011828
OG0001179	1	2	3	AAEL002870	AGAP004394, AGAP012819
OG0001180	2	1	3	AAEL002905, AAEL009418	AGAP001040
OG0001181	2	1	3	AAEL002908, AAEL015451	AGAP000603
OG0001182	1	2	3	AAEL002924	AGAP000812, AGAP011060
OG0001183	2	1	3	AAEL002932, AAEL023241	AGAP013158
OG0001184	2	1	3	AAEL002949, AAEL020993	AGAP003466
OG0001185	1	2	3	AAEL002961	AGAP003467, AGAP003472
OG0001186	2	1	3	AAEL002962, AAEL024580	AGAP003465
OG0001187	1	2	3	AAEL002967	AGAP010402, AGAP013018
OG0001188	1	2	3	AAEL003001	AGAP002019, AGAP012731
OG0001189	1	2	3	AAEL003020	AGAP000819, AGAP002234
OG0001190	2	1	3	AAEL003063, AAEL024996	AGAP005742
OG0001191	1	2	3	AAEL003069	AGAP004200, AGAP013350
OG0001192	1	2	3	AAEL003117	AGAP002839, AGAP006264
OG0001193	2	1	3	AAEL003145, AAEL022327	AGAP011745
OG0001194	1	2	3	AAEL003154	AGAP003408, AGAP012641
OG0001195	2	1	3	AAEL003165, AAEL020987	AGAP004079
OG0001196	2	1	3	AAEL003188, AAEL021106	AGAP001724
OG0001197	1	2	3	AAEL003194	AGAP004109, AGAP012802
OG0001198	2	1	3	AAEL003202, AAEL024681	AGAP001715
OG0001199	2	1	3	AAEL003208, AAEL019417	AGAP001716
OG0001200	2	1	3	AAEL003320, AAEL028035	AGAP004724
OG0001201	2	1	3	AAEL003339, AAEL009267	AGAP007764
OG0001202	2	1	3	AAEL003373, AAEL024398	AGAP001866
OG0001203	2	1	3	AAEL003397, AAEL024180	AGAP001865
OG0001204	1	2	3	AAEL003421	AGAP007370, AGAP010328
OG0001205	1	2	3	AAEL003424	AGAP011434, AGAP011435
OG0001206	1	2	3	AAEL003442	AGAP011665, AGAP011921
OG0001207	2	1	3	AAEL003448, AAEL017549	AGAP028630
OG0001208	3	0	3	AAEL003457, AAEL003467, AAEL019870
OG0001209	2	1	3	AAEL003461, AAEL024690	AGAP007728
OG0001210	1	2	3	AAEL003477	AGAP002952, AGAP007392
OG0001211	2	1	3	AAEL003485, AAEL011554	AGAP004758
OG0001212	1	2	3	AAEL003509	AGAP012088, AGAP012887
OG0001213	2	1	3	AAEL003530, AAEL005027	AGAP007740
OG0001214	2	1	3	AAEL003541, AAEL026564	AGAP008844
OG0001215	2	1	3	AAEL003550, AAEL027762	AGAP008843
OG0001216	2	1	3	AAEL003562, AAEL023067	AGAP003845
OG0001217	2	1	3	AAEL003564, AAEL003568	AGAP003571
OG0001218	3	0	3	AAEL003589, AAEL020729, AAEL021931
OG0001219	2	1	3	AAEL003658, AAEL004624	AGAP001381
OG0001220	2	1	3	AAEL003666, AAEL027460	AGAP009907
OG0001221	1	2	3	AAEL003714	AGAP006703, AGAP006704
OG0001222	2	1	3	AAEL003749, AAEL024850	AGAP003707
OG0001223	1	2	3	AAEL003752	AGAP003698, AGAP003701
OG0001224	2	1	3	AAEL003754, AAEL022058	AGAP003424
OG0001225	2	1	3	AAEL003755, AAEL020229	AGAP003706
OG0001226	2	1	3	AAEL003756, AAEL011715	AGAP005461
OG0001227	2	1	3	AAEL003757, AAEL025958	AGAP004622
OG0001228	2	1	3	AAEL003771, AAEL022498	AGAP003705
OG0001229	2	1	3	AAEL003813, AAEL023552	AGAP004736
OG0001230	2	1	3	AAEL003835, AAEL023486	AGAP011284
OG0001231	2	1	3	AAEL003840, AAEL003844	AGAP011287
OG0001232	3	0	3	AAEL003842, AAEL029056, AAEL029063
OG0001233	2	1	3	AAEL003867, AAEL003891	AGAP001756
OG0001234	2	1	3	AAEL003903, AAEL003915	AGAP002387
OG0001235	2	1	3	AAEL003908, AAEL025153	AGAP001685
OG0001236	1	2	3	AAEL003934	AGAP007851, AGAP013771
OG0001237	2	1	3	AAEL003959, AAEL003961	AGAP010696
OG0001238	2	1	3	AAEL003977, AAEL026052	AGAP010695
OG0001239	2	1	3	AAEL003983, AAEL021114	AGAP009684
OG0001240	2	1	3	AAEL003986, AAEL027639	AGAP011832
OG0001241	2	1	3	AAEL004016, AAEL004020	AGAP002975
OG0001242	1	2	3	AAEL004023	AGAP003123, AGAP003220
OG0001243	1	2	3	AAEL004024	AGAP002980, AGAP003272
OG0001244	1	2	3	AAEL004025	AGAP003785, AGAP012609
OG0001245	2	1	3	AAEL004035, AAEL022660	AGAP002970
OG0001246	1	2	3	AAEL004041	AGAP003789, AGAP012547
OG0001247	1	2	3	AAEL004052	AGAP000951, AGAP028116
OG0001248	1	2	3	AAEL004096	AGAP012852, AGAP029733
OG0001249	1	2	3	AAEL004117	AGAP007953, AGAP008081
OG0001250	2	1	3	AAEL004126, AAEL018110	AGAP003209
OG0001251	2	1	3	AAEL004165, AAEL025212	AGAP005567
OG0001252	2	1	3	AAEL004175, AAEL025999	AGAP004887
OG0001253	1	2	3	AAEL004200	AGAP002580, AGAP002581
OG0001254	1	2	3	AAEL004239	AGAP009691, AGAP009692
OG0001255	2	1	3	AAEL004243, AAEL006956	AGAP003619
OG0001256	2	1	3	AAEL004273, AAEL004281	AGAP007981
OG0001257	1	2	3	AAEL004293	AGAP013051, AGAP029421
OG0001258	1	2	3	AAEL004297	AGAP010155, AGAP010156
OG0001259	2	1	3	AAEL004302, AAEL025429	AGAP008723
OG0001260	1	2	3	AAEL004329	AGAP010419, AGAP012773
OG0001261	3	0	3	AAEL004342, AAEL004343, AAEL018102
OG0001262	2	1	3	AAEL004344, AAEL013210	AGAP011655
OG0001263	2	1	3	AAEL004379, AAEL025271	AGAP003121
OG0001264	1	2	3	AAEL004385	AGAP003527, AGAP012869
OG0001265	2	1	3	AAEL004392, AAEL014196	AGAP001014
OG0001266	2	1	3	AAEL004397, AAEL026603	AGAP001011
OG0001267	1	2	3	AAEL004398	AGAP004034, AGAP012698
OG0001268	1	2	3	AAEL004420	AGAP005036, AGAP012760
OG0001269	1	2	3	AAEL004433	AGAP011146, AGAP011148
OG0001270	1	2	3	AAEL004445	AGAP011145, AGAP011147
OG0001271	2	1	3	AAEL004450, AAEL023070	AGAP002113
OG0001272	2	1	3	AAEL004458, AAEL025887	AGAP002111
OG0001273	2	1	3	AAEL004467, AAEL016973	AGAP004723
OG0001274	2	1	3	AAEL004471, AAEL021932	AGAP001802
OG0001275	2	1	3	AAEL004472, AAEL004978	AGAP003047
OG0001276	2	1	3	AAEL004475, AAEL027716	AGAP001712
OG0001277	2	1	3	AAEL004477, AAEL027029	AGAP002110
OG0001278	2	1	3	AAEL004480, AAEL021242	AGAP002114
OG0001279	2	1	3	AAEL004486, AAEL004487	AGAP009435
OG0001280	2	1	3	AAEL004489, AAEL024995	AGAP009432
OG0001281	1	2	3	AAEL004507	AGAP009436, AGAP009437
OG0001282	2	1	3	AAEL004520, AAEL013900	AGAP008646
OG0001283	2	1	3	AAEL004523, AAEL010716	AGAP009182
OG0001284	1	2	3	AAEL004532	AGAP009610, AGAP009611
OG0001285	2	1	3	AAEL004566, AAEL020850	AGAP001396
OG0001286	2	1	3	AAEL004686, AAEL010341	AGAP009746
OG0001287	1	2	3	AAEL004705	AGAP006406, AGAP013127
OG0001288	2	1	3	AAEL004713, AAEL006156	AGAP004202
OG0001289	2	1	3	AAEL004717, AAEL020237	AGAP008533
OG0001290	3	0	3	AAEL004729, AAEL004736, AAEL026708
OG0001291	3	0	3	AAEL004730, AAEL023262, AAEL025094
OG0001292	3	0	3	AAEL004742, AAEL004760, AAEL004764
OG0001293	1	2	3	AAEL004748	AGAP010099, AGAP010100
OG0001294	3	0	3	AAEL004750, AAEL022153, AAEL024364
OG0001295	2	1	3	AAEL004755, AAEL004784	AGAP010130
OG0001296	1	2	3	AAEL004769	AGAP010109, AGAP010124
OG0001297	2	1	3	AAEL004783, AAEL020753	AGAP010131
OG0001298	1	2	3	AAEL004791	AGAP002081, AGAP012694
OG0001299	2	1	3	AAEL004809, AAEL013885	AGAP000570
OG0001300	2	1	3	AAEL004810, AAEL004819	AGAP029667
OG0001301	2	1	3	AAEL004823, AAEL025388	AGAP010517
OG0001302	2	1	3	AAEL004859, AAEL027919	AGAP006599
OG0001303	2	1	3	AAEL004861, AAEL007167	AGAP007458
OG0001304	2	1	3	AAEL004868, AAEL004884	AGAP001732
OG0001305	2	1	3	AAEL004877, AAEL027692	AGAP004558
OG0001306	2	1	3	AAEL004883, AAEL024078	AGAP004555
OG0001307	2	1	3	AAEL004892, AAEL012040	AGAP004634
OG0001308	2	1	3	AAEL004900, AAEL005925	AGAP006894
OG0001309	1	2	3	AAEL004914	AGAP006895, AGAP009948
OG0001310	1	2	3	AAEL004915	AGAP005695, AGAP005696
OG0001311	1	2	3	AAEL004952	AGAP010963, AGAP010965
OG0001312	1	2	3	AAEL004957	AGAP010962, AGAP010964
OG0001313	1	2	3	AAEL004973	AGAP012606, AGAP012632
OG0001314	2	1	3	AAEL004974, AAEL021447	AGAP008806
OG0001315	2	1	3	AAEL004975, AAEL011362	AGAP009994
OG0001316	1	2	3	AAEL004990	AGAP009967, AGAP009969
OG0001317	1	2	3	AAEL005001	AGAP010326, AGAP027999
OG0001318	1	2	3	AAEL005013	AGAP008438, AGAP012637
OG0001319	1	2	3	AAEL005017	AGAP008439, AGAP009320
OG0001320	2	1	3	AAEL005022, AAEL020793	AGAP009886
OG0001321	1	2	3	AAEL005038	AGAP007952, AGAP012754
OG0001322	2	1	3	AAEL005058, AAEL018331	AGAP005299
OG0001323	2	1	3	AAEL005133, AAEL028242	AGAP009125
OG0001324	2	1	3	AAEL005137, AAEL026783	AGAP029569
OG0001325	2	1	3	AAEL005140, AAEL022249	AGAP011344
OG0001326	2	1	3	AAEL005141, AAEL022857	AGAP011346
OG0001327	2	1	3	AAEL005146, AAEL027000	AGAP011345
OG0001328	3	0	3	AAEL005164, AAEL014480, AAEL014481
OG0001329	1	2	3	AAEL005165	AGAP000008, AGAP005981
OG0001330	2	1	3	AAEL005214, AAEL018231	AGAP003793
OG0001331	1	2	3	AAEL005252	AGAP003675, AGAP012665
OG0001332	2	1	3	AAEL005255, AAEL021910	AGAP006376
OG0001333	2	1	3	AAEL005285, AAEL020047	AGAP010096
OG0001334	3	0	3	AAEL005288, AAEL012252, AAEL027360
OG0001335	1	2	3	AAEL005289	AGAP004793, AGAP012615
OG0001336	1	2	3	AAEL005293	AGAP004807, AGAP013132
OG0001337	1	2	3	AAEL005308	AGAP004773, AGAP004786
OG0001338	1	2	3	AAEL005368	AGAP009558, AGAP009559
OG0001339	1	2	3	AAEL005373	AGAP002443, AGAP002444
OG0001340	1	2	3	AAEL005391	AGAP009569, AGAP028742
OG0001341	2	1	3	AAEL005399, AAEL027245	AGAP013180
OG0001342	1	2	3	AAEL005406	AGAP003646, AGAP013307
OG0001343	2	1	3	AAEL005410, AAEL025587	AGAP004332
OG0001344	1	2	3	AAEL005411	AGAP003892, AGAP012748
OG0001345	1	2	3	AAEL005414	AGAP004329, AGAP004330
OG0001346	2	1	3	AAEL005415, AAEL024350	AGAP003719
OG0001347	1	2	3	AAEL005419	AGAP003716, AGAP003717
OG0001348	2	1	3	AAEL005437, AAEL021199	AGAP000348
OG0001349	1	2	3	AAEL005449	AGAP004910, AGAP007832
OG0001350	2	1	3	AAEL005475, AAEL022958	AGAP011316
OG0001351	2	1	3	AAEL005477, AAEL024807	AGAP011315
OG0001352	2	1	3	AAEL005478, AAEL023936	AGAP011314
OG0001353	2	1	3	AAEL005483, AAEL024169	AGAP001596
OG0001354	2	1	3	AAEL005485, AAEL020297	AGAP001113
OG0001355	1	2	3	AAEL005489	AGAP002639, AGAP002640
OG0001356	2	1	3	AAEL005518, AAEL024830	AGAP000066
OG0001357	2	1	3	AAEL005528, AAEL026634	AGAP000403
OG0001358	2	1	3	AAEL005552, AAEL020828	AGAP004352
OG0001359	2	1	3	AAEL005594, AAEL005611	AGAP001245
OG0001360	2	1	3	AAEL005596, AAEL005604	AGAP001241
OG0001361	2	1	3	AAEL005598, AAEL012074	AGAP002218
OG0001362	2	1	3	AAEL005610, AAEL024040	AGAP001138
OG0001363	2	1	3	AAEL005619, AAEL009841	AGAP001201
OG0001364	1	2	3	AAEL005631	AGAP004624, AGAP028005
OG0001365	2	1	3	AAEL005671, AAEL014772	AGAP006903
OG0001366	1	2	3	AAEL005718	AGAP012591, AGAP012870
OG0001367	2	1	3	AAEL005738, AAEL025360	AGAP010145
OG0001368	3	0	3	AAEL005749, AAEL005752, AAEL005763
OG0001369	1	2	3	AAEL005754	AGAP008585, AGAP008864
OG0001370	2	1	3	AAEL005773, AAEL028039	AGAP000431
OG0001371	2	1	3	AAEL005798, AAEL022056	AGAP002884
OG0001372	2	1	3	AAEL005811, AAEL022803	AGAP029655
OG0001373	1	2	3	AAEL005819	AGAP003688, AGAP013274
OG0001374	2	1	3	AAEL005849, AAEL007378	AGAP010892
OG0001375	2	1	3	AAEL005866, AAEL021191	AGAP012191
OG0001376	1	2	3	AAEL005874	AGAP003561, AGAP007538
OG0001377	2	1	3	AAEL005877, AAEL023516	AGAP010514
OG0001378	2	1	3	AAEL005880, AAEL027510	AGAP010515
OG0001379	2	1	3	AAEL005891, AAEL022858	AGAP006622
OG0001380	2	1	3	AAEL005892, AAEL025333	AGAP010516
OG0001381	2	1	3	AAEL005893, AAEL020020	AGAP010380
OG0001382	2	1	3	AAEL005901, AAEL019789	AGAP003532
OG0001383	2	1	3	AAEL005907, AAEL021750	AGAP004485
OG0001384	1	2	3	AAEL005921	AGAP004189, AGAP004195
OG0001385	1	2	3	AAEL005924	AGAP004183, AGAP004184
OG0001386	1	2	3	AAEL005926	AGAP010225, AGAP012755
OG0001387	1	2	3	AAEL005931	AGAP004197, AGAP012449
OG0001388	2	1	3	AAEL005939, AAEL020519	AGAP001778
OG0001389	1	2	3	AAEL005943	AGAP003158, AGAP012859
OG0001390	2	1	3	AAEL005950, AAEL020376	AGAP002891
OG0001391	2	1	3	AAEL005960, AAEL017464	AGAP002621
OG0001392	2	1	3	AAEL005978, AAEL015668	AGAP005713
OG0001393	2	1	3	AAEL005991, AAEL009100	AGAP002939
OG0001394	1	2	3	AAEL005997	AGAP013189, AGAP013400
OG0001395	2	1	3	AAEL006001, AAEL026797	AGAP009525
OG0001396	2	1	3	AAEL006003, AAEL006005	AGAP009520
OG0001397	1	2	3	AAEL006023	AGAP010733, AGAP012627
OG0001398	2	1	3	AAEL006026, AAEL023372	AGAP002038
OG0001399	1	2	3	AAEL006027	AGAP004794, AGAP029277
OG0001400	2	1	3	AAEL006034, AAEL025718	AGAP012357
OG0001401	3	0	3	AAEL006037, AAEL020692, AAEL025059
OG0001402	2	1	3	AAEL006038, AAEL025276	AGAP002030
OG0001403	1	2	3	AAEL006039	AGAP002026, AGAP012908
OG0001404	2	1	3	AAEL006063, AAEL023240	AGAP003890
OG0001405	2	1	3	AAEL006075, AAEL025772	AGAP003891
OG0001406	1	2	3	AAEL006080	AGAP006734, AGAP013412
OG0001407	2	1	3	AAEL006094, AAEL006109	AGAP011367
OG0001408	1	2	3	AAEL006113	AGAP004115, AGAP004116
OG0001409	2	1	3	AAEL006114, AAEL007205	AGAP004228
OG0001410	2	1	3	AAEL006145, AAEL006812	AGAP004194
OG0001411	2	1	3	AAEL006151, AAEL012370	AGAP005634
OG0001412	2	1	3	AAEL006155, AAEL021190	AGAP002549
OG0001413	1	2	3	AAEL006166	AGAP004101, AGAP012836
OG0001414	1	2	3	AAEL006207	AGAP012971, AGAP013467
OG0001415	2	1	3	AAEL006216, AAEL020128	AGAP029185
OG0001416	1	2	3	AAEL006236	AGAP004268, AGAP012783
OG0001417	3	0	3	AAEL006241, AAEL012981, AAEL014700
OG0001418	1	2	3	AAEL006249	AGAP001130, AGAP003314
OG0001419	1	2	3	AAEL006258	AGAP008378, AGAP008380
OG0001420	2	1	3	AAEL006283, AAEL019821	AGAP005229
OG0001421	1	2	3	AAEL006320	AGAP003187, AGAP012901
OG0001422	2	1	3	AAEL006326, AAEL006348	AGAP011025
OG0001423	1	2	3	AAEL006328	AGAP011976, AGAP028193
OG0001424	1	2	3	AAEL006334	AGAP012648, AGAP029463
OG0001425	1	2	3	AAEL006341	AGAP010988, AGAP012808
OG0001426	2	1	3	AAEL006343, AAEL025287	AGAP011964
OG0001427	1	2	3	AAEL006347	AGAP011026, AGAP011971
OG0001428	2	1	3	AAEL006355, AAEL006361	AGAP011974
OG0001429	1	2	3	AAEL006356	AGAP010984, AGAP012880
OG0001430	2	1	3	AAEL006365, AAEL006368	AGAP006487
OG0001431	1	2	3	AAEL006383	AGAP011608, AGAP029313
OG0001432	2	1	3	AAEL006416, AAEL009224	AGAP006798
OG0001433	2	1	3	AAEL006440, AAEL007284	AGAP001471
OG0001434	1	2	3	AAEL006473	AGAP001460, AGAP010496
OG0001435	1	2	3	AAEL006474	AGAP010451, AGAP029272
OG0001436	2	1	3	AAEL006476, AAEL011086	AGAP010223
OG0001437	2	1	3	AAEL006481, AAEL006503	AGAP001184
OG0001438	2	1	3	AAEL006507, AAEL006515	AGAP007929
OG0001439	2	1	3	AAEL006518, AAEL025432	AGAP009489
OG0001440	2	1	3	AAEL006526, AAEL006535	AGAP009493
OG0001441	2	1	3	AAEL006532, AAEL022739	AGAP009488
OG0001442	1	2	3	AAEL006539	AGAP009961, AGAP029102
OG0001443	2	1	3	AAEL006543, AAEL014518	AGAP005433
OG0001444	2	1	3	AAEL006570, AAEL015457	AGAP006177
OG0001445	2	1	3	AAEL006571, AAEL007642	AGAP002966
OG0001446	2	1	3	AAEL006617, AAEL006630	AGAP013738
OG0001447	1	2	3	AAEL006623	AGAP007916, AGAP028189
OG0001448	1	2	3	AAEL006649	AGAP003004, AGAP010017
OG0001449	2	1	3	AAEL006659, AAEL027492	AGAP001217
OG0001450	1	2	3	AAEL006660	AGAP010018, AGAP012743
OG0001451	2	1	3	AAEL006675, AAEL011988	AGAP029448
OG0001452	2	1	3	AAEL006686, AAEL029061	AGAP028051
OG0001453	2	1	3	AAEL006687, AAEL020946	AGAP011904
OG0001454	2	1	3	AAEL006708, AAEL027817	AGAP001412
OG0001455	2	1	3	AAEL006732, AAEL026097	AGAP005412
OG0001456	2	1	3	AAEL006772, AAEL024260	AGAP029645
OG0001457	2	1	3	AAEL006785, AAEL021422	AGAP012284
OG0001458	1	2	3	AAEL006797	AGAP003285, AGAP012769
OG0001459	2	1	3	AAEL006830, AAEL006985	AGAP000879
OG0001460	2	1	3	AAEL006839, AAEL011178	AGAP002533
OG0001461	2	1	3	AAEL006856, AAEL023412	AGAP012105
OG0001462	2	1	3	AAEL006859, AAEL014276	AGAP003410
OG0001463	2	1	3	AAEL006865, AAEL007690	AGAP010035
OG0001464	1	2	3	AAEL006867	AGAP012049, AGAP012050
OG0001465	2	1	3	AAEL006876, AAEL027925	AGAP012103
OG0001466	1	2	3	AAEL006908	AGAP010236, AGAP010237
OG0001467	2	1	3	AAEL006936, AAEL006949	AGAP000880
OG0001468	1	2	3	AAEL006947	AGAP001592, AGAP012824
OG0001469	2	1	3	AAEL006948, AAEL024962	AGAP000009
OG0001470	2	1	3	AAEL006950, AAEL013813	AGAP000826
OG0001471	2	1	3	AAEL006953, AAEL021372	AGAP006793
OG0001472	2	1	3	AAEL006955, AAEL021249	AGAP001591
OG0001473	2	1	3	AAEL006962, AAEL006964	AGAP009106
OG0001474	2	1	3	AAEL006968, AAEL006971	AGAP009110
OG0001475	1	2	3	AAEL006975	AGAP003869, AGAP007904
OG0001476	2	1	3	AAEL006987, AAEL006990	AGAP008666
OG0001477	2	1	3	AAEL006993, AAEL023712	AGAP004273
OG0001478	2	1	3	AAEL007001, AAEL025660	AGAP007871
OG0001479	2	1	3	AAEL007004, AAEL024395	AGAP004272
OG0001480	1	2	3	AAEL007007	AGAP004275, AGAP012691
OG0001481	2	1	3	AAEL007033, AAEL024717	AGAP005009
OG0001482	2	1	3	AAEL007045, AAEL020329	AGAP012375
OG0001483	1	2	3	AAEL007049	AGAP011444, AGAP012608
OG0001484	3	0	3	AAEL007095, AAEL007101, AAEL015222
OG0001485	1	2	3	AAEL007187	AGAP008105, AGAP012905
OG0001486	1	2	3	AAEL007197	AGAP009897, AGAP009898
OG0001487	1	2	3	AAEL007217	AGAP003419, AGAP013345
OG0001488	1	2	3	AAEL007220	AGAP005985, AGAP005986
OG0001489	2	1	3	AAEL007228, AAEL023227	AGAP008497
OG0001490	2	1	3	AAEL007234, AAEL023108	AGAP009290
OG0001491	2	1	3	AAEL007250, AAEL023757	AGAP028525
OG0001492	2	1	3	AAEL007278, AAEL022274	AGAP009183
OG0001493	1	2	3	AAEL007289	AGAP003006, AGAP003007
OG0001494	2	1	3	AAEL007373, AAEL007377	AGAP003989
OG0001495	1	2	3	AAEL007409	AGAP005810, AGAP005811
OG0001496	1	2	3	AAEL007450	AGAP007972, AGAP012585
OG0001497	2	1	3	AAEL007455, AAEL008062	AGAP002157
OG0001498	2	1	3	AAEL007492, AAEL025261	AGAP002392
OG0001499	2	1	3	AAEL007496, AAEL022065	AGAP002394
OG0001500	1	2	3	AAEL007512	AGAP003508, AGAP012862
OG0001501	2	1	3	AAEL007514, AAEL007600	AGAP004570
OG0001502	1	2	3	AAEL007544	AGAP008341, AGAP009784
OG0001503	2	1	3	AAEL007556, AAEL024676	AGAP009785
OG0001504	1	2	3	AAEL007568	AGAP008771, AGAP012796
OG0001505	2	1	3	AAEL007572, AAEL020170	AGAP009044
OG0001506	2	1	3	AAEL007576, AAEL023687	AGAP009045
OG0001507	2	1	3	AAEL007578, AAEL021474	AGAP009048
OG0001508	2	1	3	AAEL007579, AAEL024943	AGAP002316
OG0001509	2	1	3	AAEL007581, AAEL024947	AGAP009047
OG0001510	1	2	3	AAEL007662	AGAP000627, AGAP004901
OG0001511	2	1	3	AAEL007687, AAEL028226	AGAP010029
OG0001512	1	2	3	AAEL007693	AGAP010043, AGAP012628
OG0001513	2	1	3	AAEL007708, AAEL026096	AGAP009506
OG0001514	1	2	3	AAEL007719	AGAP000731, AGAP010391
OG0001515	2	1	3	AAEL007762, AAEL027458	AGAP000110
OG0001516	3	0	3	AAEL007783, AAEL009284, AAEL009296
OG0001517	2	1	3	AAEL007797, AAEL028044	AGAP003744
OG0001518	2	1	3	AAEL007799, AAEL022067	AGAP003742
OG0001519	2	1	3	AAEL007814, AAEL021591	AGAP003739
OG0001520	2	1	3	AAEL007832, AAEL021197	AGAP004675
OG0001521	2	1	3	AAEL007880, AAEL024196	AGAP011805
OG0001522	2	1	3	AAEL007884, AAEL025379	AGAP012183
OG0001523	1	2	3	AAEL007889	AGAP012307, AGAP012813
OG0001524	2	1	3	AAEL007895, AAEL019794	AGAP004781
OG0001525	1	2	3	AAEL007899	AGAP009548, AGAP012655
OG0001526	2	1	3	AAEL007987, AAEL025151	AGAP007361
OG0001527	2	1	3	AAEL007992, AAEL007993	AGAP001648
OG0001528	1	2	3	AAEL007997	AGAP005383, AGAP007358
OG0001529	2	1	3	AAEL008010, AAEL025987	AGAP003305
OG0001530	2	1	3	AAEL008027, AAEL026494	AGAP000042
OG0001531	2	1	3	AAEL008037, AAEL023051	AGAP004429
OG0001532	2	1	3	AAEL008046, AAEL023409	AGAP002011
OG0001533	2	1	3	AAEL008058, AAEL011791	AGAP001469
OG0001534	1	2	3	AAEL008078	AGAP000847, AGAP013457
OG0001535	2	1	3	AAEL008109, AAEL008118	AGAP001033
OG0001536	1	2	3	AAEL008131	AGAP003968, AGAP009317
OG0001537	1	2	3	AAEL008146	AGAP011388, AGAP012772
OG0001538	2	1	3	AAEL008175, AAEL022169	AGAP001898
OG0001539	2	1	3	AAEL008177, AAEL022013	AGAP001895
OG0001540	2	1	3	AAEL008178, AAEL020843	AGAP001901
OG0001541	2	1	3	AAEL008183, AAEL026780	AGAP001897
OG0001542	1	2	3	AAEL008188	AGAP001911, AGAP012906
OG0001543	1	2	3	AAEL008193	AGAP011480, AGAP011506
OG0001544	2	1	3	AAEL008245, AAEL026615	AGAP001932
OG0001545	2	1	3	AAEL008254, AAEL021362	AGAP001931
OG0001546	2	1	3	AAEL008259, AAEL027364	AGAP011183
OG0001547	2	1	3	AAEL008267, AAEL022284	AGAP011179
OG0001548	2	1	3	AAEL008269, AAEL020213	AGAP004761
OG0001549	2	1	3	AAEL008283, AAEL023637	AGAP011184
OG0001550	3	0	3	AAEL008284, AAEL008288, AAEL008294
OG0001551	1	2	3	AAEL008295	AGAP005453, AGAP005454
OG0001552	2	1	3	AAEL008299, AAEL026955	AGAP013382
OG0001553	2	1	3	AAEL008306, AAEL020291	AGAP000747
OG0001554	2	1	3	AAEL008324, AAEL017289	AGAP010009
OG0001555	1	2	3	AAEL008356	AGAP006345, AGAP006346
OG0001556	2	1	3	AAEL008370, AAEL027927	AGAP003373
OG0001557	1	2	3	AAEL008389	AGAP012141, AGAP012913
OG0001558	1	2	3	AAEL008391	AGAP005044, AGAP012144
OG0001559	2	1	3	AAEL008404, AAEL022775	AGAP000290
OG0001560	2	1	3	AAEL008414, AAEL021404	AGAP013081
OG0001561	2	1	3	AAEL008417, AAEL028177	AGAP004110
OG0001562	1	2	3	AAEL008434	AGAP010224, AGAP012756
OG0001563	2	1	3	AAEL008454, AAEL027406	AGAP002320
OG0001564	1	2	3	AAEL008466	AGAP009302, AGAP012428
OG0001565	2	1	3	AAEL008472, AAEL008474	AGAP007581
OG0001566	1	2	3	AAEL008493	AGAP007956, AGAP009130
OG0001567	2	1	3	AAEL008494, AAEL025921	AGAP009128
OG0001568	2	1	3	AAEL008507, AAEL023619	AGAP005322
OG0001569	2	1	3	AAEL008575, AAEL023635	AGAP002151
OG0001570	2	1	3	AAEL008595, AAEL018151	AGAP002022
OG0001571	1	2	3	AAEL008651	AGAP001449, AGAP013329
OG0001572	1	2	3	AAEL008656	AGAP001447, AGAP006509
OG0001573	1	2	3	AAEL008664	AGAP000784, AGAP008167
OG0001574	2	1	3	AAEL008672, AAEL027686	AGAP029500
OG0001575	2	1	3	AAEL008687, AAEL013721	AGAP009781
OG0001576	1	2	3	AAEL008711	AGAP004006, AGAP004007
OG0001577	2	1	3	AAEL008749, AAEL008751	AGAP002327
OG0001578	1	2	3	AAEL008809	AGAP004474, AGAP005516
OG0001579	1	2	3	AAEL008826	AGAP002039, AGAP012803
OG0001580	2	1	3	AAEL008837, AAEL020133	AGAP008680
OG0001581	3	0	3	AAEL008838, AAEL023965, AAEL024631
OG0001582	1	2	3	AAEL008841	AGAP007958, AGAP011215
OG0001583	2	1	3	AAEL008842, AAEL023781	AGAP029610
OG0001584	1	2	3	AAEL008865	AGAP004759, AGAP012804
OG0001585	1	2	3	AAEL008936	AGAP011604, AGAP011605
OG0001586	2	1	3	AAEL008956, AAEL026683	AGAP000328
OG0001587	2	1	3	AAEL008963, AAEL022297	AGAP000327
OG0001588	1	2	3	AAEL009011	AGAP006834, AGAP006837
OG0001589	1	2	3	AAEL009077	AGAP007300, AGAP012589
OG0001590	1	2	3	AAEL009089	AGAP007296, AGAP012847
OG0001591	1	2	3	AAEL009148	AGAP009924, AGAP012635
OG0001592	2	1	3	AAEL009149, AAEL023309	AGAP004208
OG0001593	2	1	3	AAEL009153, AAEL025687	AGAP001788
OG0001594	2	1	3	AAEL009183, AAEL027505	AGAP005624
OG0001595	2	1	3	AAEL009192, AAEL023587	AGAP005625
OG0001596	1	2	3	AAEL009206	AGAP001202, AGAP012383
OG0001597	2	1	3	AAEL009276, AAEL021214	AGAP007115
OG0001598	2	1	3	AAEL009280, AAEL023779	AGAP011135
OG0001599	2	1	3	AAEL009306, AAEL023202	AGAP007117
OG0001600	2	1	3	AAEL009309, AAEL027140	AGAP004556
OG0001601	2	1	3	AAEL009314, AAEL024256	AGAP004562
OG0001602	2	1	3	AAEL009323, AAEL009330	AGAP004895
OG0001603	2	1	3	AAEL009339, AAEL012125	AGAP009329
OG0001604	2	1	3	AAEL009351, AAEL021624	AGAP007201
OG0001605	2	1	3	AAEL009356, AAEL024601	AGAP007202
OG0001606	2	1	3	AAEL009371, AAEL024459	AGAP004805
OG0001607	2	1	3	AAEL009372, AAEL027008	AGAP001943
OG0001608	2	1	3	AAEL009394, AAEL024085	AGAP011876
OG0001609	1	2	3	AAEL009420	AGAP010132, AGAP012849
OG0001610	2	1	3	AAEL009448, AAEL013687	AGAP005116
OG0001611	2	1	3	AAEL009458, AAEL009471	AGAP001030
OG0001612	3	0	3	AAEL009463, AAEL009464, AAEL025913
OG0001613	2	1	3	AAEL009469, AAEL023741	AGAP002954
OG0001614	3	0	3	AAEL009476, AAEL009480, AAEL026834
OG0001615	2	1	3	AAEL009479, AAEL024520	AGAP000540
OG0001616	2	1	3	AAEL009486, AAEL023604	AGAP000982
OG0001617	2	1	3	AAEL009498, AAEL017156	AGAP008151
OG0001618	2	1	3	AAEL009503, AAEL020495	AGAP011350
OG0001619	2	1	3	AAEL009506, AAEL020447	AGAP010591
OG0001620	1	2	3	AAEL009507	AGAP010739, AGAP012678
OG0001621	3	0	3	AAEL009514, AAEL015106, AAEL027607
OG0001622	1	2	3	AAEL009543	AGAP012806, AGAP029204
OG0001623	2	1	3	AAEL009545, AAEL021916	AGAP004716
OG0001624	1	2	3	AAEL009590	AGAP010227, AGAP013748
OG0001625	1	2	3	AAEL009596	AGAP012216, AGAP012217
OG0001626	2	1	3	AAEL009597, AAEL020462	AGAP002190
OG0001627	3	0	3	AAEL009610, AAEL013024, AAEL025842
OG0001628	2	1	3	AAEL009630, AAEL020156	AGAP029487
OG0001629	1	2	3	AAEL009637	AGAP004531, AGAP004533
OG0001630	2	1	3	AAEL009644, AAEL013110	AGAP004082
OG0001631	1	2	3	AAEL009649	AGAP000923, AGAP005336
OG0001632	2	1	3	AAEL009669, AAEL009927	AGAP002341
OG0001633	2	1	3	AAEL009697, AAEL013598	AGAP003433
OG0001634	2	1	3	AAEL009701, AAEL025383	AGAP029562
OG0001635	2	1	3	AAEL009720, AAEL021799	AGAP003446
OG0001636	1	2	3	AAEL009722	AGAP004639, AGAP013117
OG0001637	2	1	3	AAEL009748, AAEL026380	AGAP010368
OG0001638	2	1	3	AAEL009750, AAEL024495	AGAP029717
OG0001639	2	1	3	AAEL009751, AAEL009757	AGAP010377
OG0001640	2	1	3	AAEL009825, AAEL024434	AGAP010257
OG0001641	2	1	3	AAEL009872, AAEL028144	AGAP000901
OG0001642	1	2	3	AAEL009911	AGAP004321, AGAP013475
OG0001643	2	1	3	AAEL009913, AAEL012015	AGAP003397
OG0001644	2	1	3	AAEL009915, AAEL022554	AGAP003449
OG0001645	1	2	3	AAEL009916	AGAP003411, AGAP013293
OG0001646	2	1	3	AAEL009949, AAEL027035	AGAP004659
OG0001647	1	2	3	AAEL009956	AGAP002847, AGAP013388
OG0001648	2	1	3	AAEL009980, AAEL025676	AGAP011778
OG0001649	2	1	3	AAEL010008, AAEL026984	AGAP004097
OG0001650	2	1	3	AAEL010013, AAEL023654	AGAP002144
OG0001651	2	1	3	AAEL010045, AAEL023468	AGAP002062
OG0001652	1	2	3	AAEL010046	AGAP002066, AGAP010841
OG0001653	2	1	3	AAEL010048, AAEL022213	AGAP002061
OG0001654	2	1	3	AAEL010049, AAEL021853	AGAP002072
OG0001655	2	1	3	AAEL010069, AAEL024373	AGAP010313
OG0001656	2	1	3	AAEL010071, AAEL022340	AGAP011126
OG0001657	1	2	3	AAEL010094	AGAP004962, AGAP004963
OG0001658	1	2	3	AAEL010097	AGAP007364, AGAP007365
OG0001659	3	0	3	AAEL010098, AAEL010099, AAEL024977
OG0001660	2	1	3	AAEL010140, AAEL010148	AGAP007790
OG0001661	2	1	3	AAEL010146, AAEL029007	AGAP007784
OG0001662	2	1	3	AAEL010178, AAEL021915	AGAP001213
OG0001663	2	1	3	AAEL010185, AAEL020182	AGAP013011
OG0001664	2	1	3	AAEL010222, AAEL026577	AGAP002238
OG0001665	2	1	3	AAEL010228, AAEL010235	AGAP009974
OG0001666	2	1	3	AAEL010247, AAEL010254	AGAP011248
OG0001667	2	1	3	AAEL010283, AAEL027623	AGAP029772
OG0001668	2	1	3	AAEL010289, AAEL027040	AGAP010233
OG0001669	1	2	3	AAEL010324	AGAP011069, AGAP012664
OG0001670	1	2	3	AAEL010327	AGAP011065, AGAP011067
OG0001671	1	2	3	AAEL010369	AGAP006395, AGAP006396
OG0001672	1	2	3	AAEL010378	AGAP007027, AGAP028597
OG0001673	1	2	3	AAEL010397	AGAP001768, AGAP013328
OG0001674	1	2	3	AAEL010412	AGAP004137, AGAP004139
OG0001675	1	2	3	AAEL010422	AGAP012972, AGAP013023
OG0001676	1	2	3	AAEL010427	AGAP003858, AGAP012793
OG0001677	1	2	3	AAEL010439	AGAP004282, AGAP013162
OG0001678	2	1	3	AAEL010461, AAEL023327	AGAP002283
OG0001679	2	1	3	AAEL010502, AAEL019574	AGAP029635
OG0001680	2	1	3	AAEL010511, AAEL021184	AGAP010794
OG0001681	1	2	3	AAEL010532	AGAP008963, AGAP008964
OG0001682	2	1	3	AAEL010561, AAEL011279	AGAP005225
OG0001683	2	1	3	AAEL010571, AAEL026067	AGAP000967
OG0001684	1	2	3	AAEL010582	AGAP004171, AGAP004378
OG0001685	1	2	3	AAEL010589	AGAP005632, AGAP012896
OG0001686	1	2	3	AAEL010591	AGAP004172, AGAP004379
OG0001687	1	2	3	AAEL010626	AGAP004122, AGAP004123
OG0001688	2	1	3	AAEL010628, AAEL010631	AGAP012556
OG0001689	2	1	3	AAEL010640, AAEL026393	AGAP009786
OG0001690	2	1	3	AAEL010644, AAEL023255	AGAP010198
OG0001691	1	2	3	AAEL010656	AGAP005496, AGAP007034
OG0001692	2	1	3	AAEL010691, AAEL017375	AGAP006818
OG0001693	2	1	3	AAEL010733, AAEL011315	AGAP009096
OG0001694	2	1	3	AAEL010742, AAEL024119	AGAP009737
OG0001695	1	2	3	AAEL010770	AGAP009585, AGAP029792
OG0001696	1	2	3	AAEL010771	AGAP009586, AGAP029791
OG0001697	2	1	3	AAEL010772, AAEL020552	AGAP009594
OG0001698	1	2	3	AAEL010791	AGAP004138, AGAP012792
OG0001699	1	2	3	AAEL010815	AGAP002024, AGAP012683
OG0001700	1	2	3	AAEL010842	AGAP006457, AGAP006458
OG0001701	1	2	3	AAEL010856	AGAP010485, AGAP028083
OG0001702	2	1	3	AAEL010859, AAEL019901	AGAP028530
OG0001703	2	1	3	AAEL010881, AAEL024444	AGAP009061
OG0001704	2	1	3	AAEL010924, AAEL021538	AGAP004059
OG0001705	2	1	3	AAEL010938, AAEL020441	AGAP011098
OG0001706	2	1	3	AAEL010946, AAEL023509	AGAP002429
OG0001707	2	1	3	AAEL010964, AAEL024051	AGAP006620
OG0001708	3	0	3	AAEL011007, AAEL014432, AAEL025451
OG0001709	1	2	3	AAEL011013	AGAP000773, AGAP010058
OG0001710	1	2	3	AAEL011019	AGAP000723, AGAP002589
OG0001711	1	2	3	AAEL011021	AGAP011362, AGAP028592
OG0001712	2	1	3	AAEL011023, AAEL012263	AGAP008429
OG0001713	2	1	3	AAEL011056, AAEL020154	AGAP028027
OG0001714	1	2	3	AAEL011074	AGAP010192, AGAP029211
OG0001715	1	2	3	AAEL011081	AGAP010140, AGAP012582
OG0001716	1	2	3	AAEL011082	AGAP010141, AGAP012747
OG0001717	1	2	3	AAEL011084	AGAP010061, AGAP012712
OG0001718	2	1	3	AAEL011105, AAEL021134	AGAP004852
OG0001719	1	2	3	AAEL011111	AGAP004265, AGAP029389
OG0001720	2	1	3	AAEL011125, AAEL027602	AGAP013249
OG0001721	2	1	3	AAEL011147, AAEL024420	AGAP003033
OG0001722	1	2	3	AAEL011157	AGAP003900, AGAP012705
OG0001723	1	2	3	AAEL011161	AGAP003896, AGAP003897
OG0001724	2	1	3	AAEL011177, AAEL011180	AGAP006398
OG0001725	2	1	3	AAEL011187, AAEL022923	AGAP001519
OG0001726	2	1	3	AAEL011210, AAEL011213	AGAP005361
OG0001727	1	2	3	AAEL011251	AGAP003369, AGAP004509
OG0001728	2	1	3	AAEL011259, AAEL023091	AGAP013427
OG0001729	2	1	3	AAEL011260, AAEL011263	AGAP002049
OG0001730	1	2	3	AAEL011268	AGAP012962, AGAP029386
OG0001731	2	1	3	AAEL011271, AAEL026600	AGAP005531
OG0001732	2	1	3	AAEL011275, AAEL022769	AGAP005530
OG0001733	1	2	3	AAEL011303	AGAP004177, AGAP013223
OG0001734	2	1	3	AAEL011329, AAEL022100	AGAP004523
OG0001735	2	1	3	AAEL011353, AAEL024423	AGAP008540
OG0001736	2	1	3	AAEL011358, AAEL021866	AGAP000978
OG0001737	2	1	3	AAEL011369, AAEL020614	AGAP007796
OG0001738	1	2	3	AAEL011379	AGAP000118, AGAP006572
OG0001739	1	2	3	AAEL011381	AGAP000794, AGAP006891
OG0001740	1	2	3	AAEL011416	AGAP012331, AGAP012867
OG0001741	1	2	3	AAEL011424	AGAP012196, AGAP012197
OG0001742	2	1	3	AAEL011458, AAEL013031	AGAP006931
OG0001743	2	1	3	AAEL011475, AAEL025944	AGAP001558
OG0001744	2	1	3	AAEL011480, AAEL021317	AGAP001559
OG0001745	3	0	3	AAEL011481, AAEL011491, AAEL020984
OG0001746	2	1	3	AAEL011488, AAEL024932	AGAP008125
OG0001747	2	1	3	AAEL011492, AAEL022271	AGAP007288
OG0001748	2	1	3	AAEL011494, AAEL025136	AGAP007289
OG0001749	2	1	3	AAEL011510, AAEL014842	AGAP006962
OG0001750	1	2	3	AAEL011513	AGAP007076, AGAP007079
OG0001751	1	2	3	AAEL011520	AGAP010854, AGAP029297
OG0001752	2	1	3	AAEL011521, AAEL017160	AGAP004026
OG0001753	2	1	3	AAEL011578, AAEL024516	AGAP006715
OG0001754	1	2	3	AAEL011579	AGAP003281, AGAP013539
OG0001755	2	1	3	AAEL011586, AAEL024424	AGAP009480
OG0001756	2	1	3	AAEL011598, AAEL027784	AGAP029199
OG0001757	1	2	3	AAEL011629	AGAP010577, AGAP028614
OG0001758	2	1	3	AAEL011648, AAEL022743	AGAP029544
OG0001759	1	2	3	AAEL011685	AGAP012917, AGAP012967
OG0001760	2	1	3	AAEL011687, AAEL022970	AGAP010454
OG0001761	2	1	3	AAEL011690, AAEL011691	AGAP011943
OG0001762	1	2	3	AAEL011697	AGAP003464, AGAP012787
OG0001763	2	1	3	AAEL011698, AAEL021810	AGAP003460
OG0001764	2	1	3	AAEL011705, AAEL015543	AGAP011963
OG0001765	2	1	3	AAEL011708, AAEL014843	AGAP006958
OG0001766	2	1	3	AAEL011714, AAEL014844	AGAP006960
OG0001767	2	1	3	AAEL011727, AAEL022615	AGAP000555
OG0001768	2	1	3	AAEL011748, AAEL025877	AGAP013136
OG0001769	2	1	3	AAEL011751, AAEL023265	AGAP000463
OG0001770	2	1	3	AAEL011754, AAEL023977	AGAP000948
OG0001771	2	1	3	AAEL011756, AAEL027336	AGAP000881
OG0001772	1	2	3	AAEL011765	AGAP004931, AGAP012721
OG0001773	2	1	3	AAEL011777, AAEL028034	AGAP003194
OG0001774	1	2	3	AAEL011812	AGAP001132, AGAP028524
OG0001775	2	1	3	AAEL011835, AAEL019454	AGAP011113
OG0001776	2	1	3	AAEL011842, AAEL023454	AGAP011839
OG0001777	2	1	3	AAEL011877, AAEL019456	AGAP006938
OG0001778	2	1	3	AAEL011900, AAEL021879	AGAP009403
OG0001779	2	1	3	AAEL011920, AAEL011922	AGAP011917
OG0001780	2	1	3	AAEL011928, AAEL013056	AGAP011922
OG0001781	1	2	3	AAEL011941	AGAP003502, AGAP012561
OG0001782	1	2	3	AAEL011944	AGAP006700, AGAP006723
OG0001783	2	1	3	AAEL011946, AAEL023162	AGAP003129
OG0001784	2	1	3	AAEL011951, AAEL011957	AGAP005512
OG0001785	2	1	3	AAEL011968, AAEL019823	AGAP004264
OG0001786	1	2	3	AAEL012016	AGAP004882, AGAP012660
OG0001787	2	1	3	AAEL012059, AAEL027882	AGAP002295
OG0001788	1	2	3	AAEL012061	AGAP002885, AGAP013314
OG0001789	1	2	3	AAEL012073	AGAP003148, AGAP009661
OG0001790	2	1	3	AAEL012088, AAEL025343	AGAP000744
OG0001791	1	2	3	AAEL012095	AGAP003215, AGAP003216
OG0001792	2	1	3	AAEL012150, AAEL026828	AGAP005727
OG0001793	2	1	3	AAEL012161, AAEL012162	AGAP005124
OG0001794	2	1	3	AAEL012178, AAEL021939	AGAP005125
OG0001795	1	2	3	AAEL012209	AGAP002073, AGAP011217
OG0001796	2	1	3	AAEL012219, AAEL025314	AGAP002900
OG0001797	2	1	3	AAEL012235, AAEL027026	AGAP000270
OG0001798	1	2	3	AAEL012239	AGAP000990, AGAP009027
OG0001799	1	2	3	AAEL012245	AGAP000988, AGAP000989
OG0001800	1	2	3	AAEL012248	AGAP001913, AGAP001990
OG0001801	2	1	3	AAEL012254, AAEL027053	AGAP001912
OG0001802	2	1	3	AAEL012311, AAEL024981	AGAP005103
OG0001803	1	2	3	AAEL012330	AGAP029725, AGAP029726
OG0001804	2	1	3	AAEL012339, AAEL023423	AGAP004579
OG0001805	2	1	3	AAEL012341, AAEL022520	AGAP001652
OG0001806	2	1	3	AAEL012344, AAEL014916	AGAP002872
OG0001807	2	1	3	AAEL012347, AAEL022078	AGAP029577
OG0001808	2	1	3	AAEL012380, AAEL021026	AGAP005205
OG0001809	1	2	3	AAEL012390	AGAP013091, AGAP013236
OG0001810	2	1	3	AAEL012391, AAEL014027	AGAP006408
OG0001811	2	1	3	AAEL012426, AAEL022629	AGAP001744
OG0001812	3	0	3	AAEL012453, AAEL023284, AAEL025602
OG0001813	2	1	3	AAEL012458, AAEL023110	AGAP000795
OG0001814	2	1	3	AAEL012471, AAEL021602	AGAP029053
OG0001815	1	2	3	AAEL012489	AGAP003503, AGAP012868
OG0001816	1	2	3	AAEL012556	AGAP007857, AGAP029218
OG0001817	2	1	3	AAEL012585, AAEL021254	AGAP008916
OG0001818	1	2	3	AAEL012618	AGAP003171, AGAP003173
OG0001819	2	1	3	AAEL012628, AAEL023247	AGAP001725
OG0001820	2	1	3	AAEL012709, AAEL028211	AGAP003645
OG0001821	2	1	3	AAEL012710, AAEL012715	AGAP000670
OG0001822	2	1	3	AAEL012731, AAEL028001	AGAP007722
OG0001823	1	2	3	AAEL012739	AGAP012596, AGAP013119
OG0001824	2	1	3	AAEL012783, AAEL018249	AGAP002508
OG0001825	2	1	3	AAEL012790, AAEL025072	AGAP003749
OG0001826	2	1	3	AAEL012796, AAEL017048	AGAP000658
OG0001827	1	2	3	AAEL012809	AGAP000725, AGAP011684
OG0001828	2	1	3	AAEL012832, AAEL021694	AGAP005520
OG0001829	1	2	3	AAEL012924	AGAP004404, AGAP012833
OG0001830	1	2	3	AAEL012962	AGAP012358, AGAP012892
OG0001831	1	2	3	AAEL012998	AGAP002707, AGAP002708
OG0001832	1	2	3	AAEL013045	AGAP029057, AGAP029317
OG0001833	1	2	3	AAEL013047	AGAP011402, AGAP012111
OG0001834	1	2	3	AAEL013058	AGAP012078, AGAP012082
OG0001835	2	1	3	AAEL013109, AAEL013111	AGAP006718
OG0001836	2	1	3	AAEL013134, AAEL023634	AGAP028012
OG0001837	2	1	3	AAEL013135, AAEL027786	AGAP012009
OG0001838	2	1	3	AAEL013152, AAEL013157	AGAP009009
OG0001839	1	2	3	AAEL013188	AGAP001816, AGAP001818
OG0001840	2	1	3	AAEL013213, AAEL026968	AGAP012516
OG0001841	2	1	3	AAEL013232, AAEL023126	AGAP010721
OG0001842	1	2	3	AAEL013236	AGAP010718, AGAP029254
OG0001843	2	1	3	AAEL013237, AAEL023175	AGAP010720
OG0001844	1	2	3	AAEL013240	AGAP003697, AGAP003699
OG0001845	2	1	3	AAEL013276, AAEL015151	AGAP004591
OG0001846	2	1	3	AAEL013277, AAEL026913	AGAP007086
OG0001847	2	1	3	AAEL013287, AAEL026466	AGAP002878
OG0001848	2	1	3	AAEL013288, AAEL013300	AGAP003086
OG0001849	1	2	3	AAEL013305	AGAP010457, AGAP029377
OG0001850	1	2	3	AAEL013330	AGAP004578, AGAP012634
OG0001851	3	0	3	AAEL013339, AAEL013345, AAEL013350
OG0001852	1	2	3	AAEL013356	AGAP009864, AGAP012814
OG0001853	2	1	3	AAEL013361, AAEL013365	AGAP008514
OG0001854	2	1	3	AAEL013408, AAEL027347	AGAP004905
OG0001855	1	2	3	AAEL013431	AGAP003860, AGAP012718
OG0001856	2	1	3	AAEL013433, AAEL013434	AGAP000346
OG0001857	2	1	3	AAEL013436, AAEL018131	AGAP005962
OG0001858	2	1	3	AAEL013441, AAEL014896	AGAP006974
OG0001859	2	1	3	AAEL013445, AAEL020064	AGAP006111
OG0001860	3	0	3	AAEL013507, AAEL016981, AAEL017129
OG0001861	1	2	3	AAEL013542	AGAP003196, AGAP013219
OG0001862	1	2	3	AAEL013612	AGAP003027, AGAP029392
OG0001863	1	2	3	AAEL013653	AGAP000336, AGAP007517
OG0001864	2	1	3	AAEL013739, AAEL024747	AGAP004031
OG0001865	2	1	3	AAEL013792, AAEL013793	AGAP001543
OG0001866	1	2	3	AAEL013818	AGAP003635, AGAP011328
OG0001867	2	1	3	AAEL013822, AAEL021953	AGAP000169
OG0001868	2	1	3	AAEL013847, AAEL028069	AGAP000519
OG0001869	1	2	3	AAEL013869	AGAP004414, AGAP010918
OG0001870	1	2	3	AAEL013887	AGAP000200, AGAP010182
OG0001871	2	1	3	AAEL013994, AAEL028215	AGAP007001
OG0001872	2	1	3	AAEL013998, AAEL027973	AGAP007002
OG0001873	2	1	3	AAEL014009, AAEL014010	AGAP000840
OG0001874	1	2	3	AAEL014044	AGAP004500, AGAP012575
OG0001875	2	1	3	AAEL014051, AAEL027396	AGAP000397
OG0001876	2	1	3	AAEL014054, AAEL025786	AGAP001586
OG0001877	2	1	3	AAEL014062, AAEL028139	AGAP001233
OG0001878	1	2	3	AAEL014102	AGAP009242, AGAP009245
OG0001879	1	2	3	AAEL014154	AGAP010873, AGAP012788
OG0001880	1	2	3	AAEL014207	AGAP008720, AGAP028006
OG0001881	3	0	3	AAEL014211, AAEL023935, AAEL027568
OG0001882	2	1	3	AAEL014216, AAEL025776	AGAP008515
OG0001883	2	1	3	AAEL014235, AAEL027196	AGAP006174
OG0001884	2	1	3	AAEL014244, AAEL014246	AGAP007374
OG0001885	2	1	3	AAEL014318, AAEL024066	AGAP006063
OG0001886	2	1	3	AAEL014335, AAEL019754	AGAP002415
OG0001887	2	1	3	AAEL014355, AAEL020555	AGAP009831
OG0001888	1	2	3	AAEL014361	AGAP002377, AGAP013161
OG0001889	1	2	3	AAEL014393	AGAP012071, AGAP012072
OG0001890	1	2	3	AAEL014416	AGAP009878, AGAP012728
OG0001891	2	1	3	AAEL014457, AAEL021584	AGAP008943
OG0001892	1	2	3	AAEL014534	AGAP008331, AGAP028184
OG0001893	2	1	3	AAEL014555, AAEL021316	AGAP009647
OG0001894	2	1	3	AAEL014557, AAEL025918	AGAP009646
OG0001895	2	1	3	AAEL014567, AAEL014571	AGAP004566
OG0001896	1	2	3	AAEL014568	AGAP013164, AGAP013254
OG0001897	2	1	3	AAEL014578, AAEL023117	AGAP007204
OG0001898	2	1	3	AAEL014594, AAEL026813	AGAP006082
OG0001899	2	1	3	AAEL014640, AAEL027982	AGAP005203
OG0001900	2	1	3	AAEL014699, AAEL017572	AGAP001523
OG0001901	1	2	3	AAEL014702	AGAP000325, AGAP007858
OG0001902	2	1	3	AAEL014752, AAEL025965	AGAP012109
OG0001903	2	1	3	AAEL014761, AAEL027643	AGAP003297
OG0001904	2	1	3	AAEL014763, AAEL022827	AGAP002953
OG0001905	2	1	3	AAEL014820, AAEL014822	AGAP001594
OG0001906	1	2	3	AAEL014913	AGAP004596, AGAP029383
OG0001907	2	1	3	AAEL014936, AAEL020430	AGAP007123
OG0001908	2	1	3	AAEL014972, AAEL020524	AGAP005563
OG0001909	2	1	3	AAEL014992, AAEL027706	AGAP005551
OG0001910	1	2	3	AAEL015042	AGAP006749, AGAP013757
OG0001911	1	2	3	AAEL015048	AGAP004338, AGAP009478
OG0001912	2	1	3	AAEL015099, AAEL026694	AGAP005031
OG0001913	3	0	3	AAEL015115, AAEL025989, AAEL027600
OG0001914	2	1	3	AAEL015147, AAEL017548	AGAP006167
OG0001915	2	1	3	AAEL015402, AAEL020424	AGAP007510
OG0001916	1	2	3	AAEL015557	AGAP010040, AGAP012657
OG0001917	1	2	3	AAEL015559	AGAP000621, AGAP006210
OG0001918	2	1	3	AAEL015566, AAEL015567	AGAP007286
OG0001919	2	1	3	AAEL015637, AAEL019767	AGAP029769
OG0001920	2	1	3	AAEL016992, AAEL027508	AGAP006176
OG0001921	2	1	3	AAEL017004, AAEL023060	AGAP012139
OG0001922	2	1	3	AAEL017005, AAEL019786	AGAP000351
OG0001923	1	2	3	AAEL017015	AGAP000352, AGAP013269
OG0001924	2	1	3	AAEL017029, AAEL021847	AGAP005712
OG0001925	2	1	3	AAEL017135, AAEL020135	AGAP004560
OG0001926	1	2	3	AAEL017158	AGAP006143, AGAP006917
OG0001927	2	1	3	AAEL017186, AAEL023345	AGAP007775
OG0001928	2	1	3	AAEL017227, AAEL028143	AGAP003310
OG0001929	2	1	3	AAEL017238, AAEL018189	AGAP001022
OG0001930	1	2	3	AAEL017251	AGAP029751, AGAP029752
OG0001931	2	1	3	AAEL017258, AAEL028108	AGAP010727
OG0001932	3	0	3	AAEL017293, AAEL020537, AAEL025320
OG0001933	1	2	3	AAEL017304	AGAP009853, AGAP009856
OG0001934	2	1	3	AAEL017350, AAEL020171	AGAP029399
OG0001935	2	1	3	AAEL017357, AAEL026428	AGAP001296
OG0001936	2	1	3	AAEL017363, AAEL027116	AGAP004703
OG0001937	2	1	3	AAEL017367, AAEL027571	AGAP028223
OG0001938	1	2	3	AAEL017397	AGAP006150, AGAP007148
OG0001939	1	2	3	AAEL017446	AGAP004313, AGAP009256
OG0001940	2	1	3	AAEL017499, AAEL020026	AGAP002414
OG0001941	1	2	3	AAEL017508	AGAP003073, AGAP003074
OG0001942	2	1	3	AAEL018036, AAEL019858	AGAP029620
OG0001943	2	1	3	AAEL018050, AAEL023244	AGAP004269
OG0001944	2	1	3	AAEL018051, AAEL025669	AGAP001168
OG0001945	3	0	3	AAEL018103, AAEL025324, AAEL026175
OG0001946	2	1	3	AAEL018118, AAEL027698	AGAP011966
OG0001947	2	1	3	AAEL018120, AAEL021091	AGAP007333
OG0001948	1	2	3	AAEL018137	AGAP011666, AGAP011667
OG0001949	1	2	3	AAEL018148	AGAP009543, AGAP029104
OG0001950	1	2	3	AAEL018149	AGAP006026, AGAP006027
OG0001951	2	1	3	AAEL018234, AAEL019811	AGAP006347
OG0001952	1	2	3	AAEL018241	AGAP008714, AGAP011982
OG0001953	1	2	3	AAEL018302	AGAP007305, AGAP012771
OG0001954	2	1	3	AAEL018306, AAEL024534	AGAP003709
OG0001955	1	2	3	AAEL018310	AGAP012729, AGAP028640
OG0001956	1	2	3	AAEL018326	AGAP005988, AGAP005989
OG0001957	2	1	3	AAEL018329, AAEL022435	AGAP029241
OG0001958	1	2	3	AAEL018680	AGAP012727, AGAP028382
OG0001959	1	2	3	AAEL019406	AGAP012693, AGAP029564
OG0001960	2	1	3	AAEL019418, AAEL023349	AGAP029052
OG0001961	2	1	3	AAEL019419, AAEL019420	AGAP029630
OG0001962	2	1	3	AAEL019432, AAEL021437	AGAP005755
OG0001963	1	2	3	AAEL019450	AGAP012203, AGAP028585
OG0001964	2	1	3	AAEL019451, AAEL022705	AGAP007560
OG0001965	1	2	3	AAEL019459	AGAP012590, AGAP012857
OG0001966	1	2	3	AAEL019479	AGAP001439, AGAP001444
OG0001967	2	1	3	AAEL019493, AAEL020474	AGAP029486
OG0001968	1	2	3	AAEL019507	AGAP011499, AGAP029048
OG0001969	1	2	3	AAEL019517	AGAP000559, AGAP000588
OG0001970	2	1	3	AAEL019527, AAEL020889	AGAP010520
OG0001971	2	1	3	AAEL019528, AAEL024379	AGAP007163
OG0001972	1	2	3	AAEL019538	AGAP006634, AGAP006636
OG0001973	2	1	3	AAEL019541, AAEL020564	AGAP009820
OG0001974	2	1	3	AAEL019543, AAEL027650	AGAP011811
OG0001975	2	1	3	AAEL019563, AAEL024722	AGAP005300
OG0001976	2	1	3	AAEL019567, AAEL020206	AGAP001315
OG0001977	1	2	3	AAEL019568	AGAP009447, AGAP012874
OG0001978	1	2	3	AAEL019578	AGAP001496, AGAP007308
OG0001979	2	1	3	AAEL019618, AAEL025187	AGAP007563
OG0001980	2	1	3	AAEL019619, AAEL025304	AGAP001583
OG0001981	2	1	3	AAEL019620, AAEL019621	AGAP000913
OG0001982	2	1	3	AAEL019631, AAEL025224	AGAP012026
OG0001983	1	2	3	AAEL019632	AGAP004892, AGAP012775
OG0001984	2	1	3	AAEL019634, AAEL020239	AGAP007994
OG0001985	2	1	3	AAEL019653, AAEL023118	AGAP009793
OG0001986	1	2	3	AAEL019658	AGAP010024, AGAP029234
OG0001987	2	1	3	AAEL019671, AAEL021311	AGAP001608
OG0001988	2	1	3	AAEL019706, AAEL021067	AGAP004577
OG0001989	2	1	3	AAEL019718, AAEL019719	AGAP009526
OG0001990	2	1	3	AAEL019721, AAEL021660	AGAP013204
OG0001991	2	1	3	AAEL019724, AAEL024579	AGAP010909
OG0001992	2	1	3	AAEL019733, AAEL027627	AGAP000504
OG0001993	2	1	3	AAEL019734, AAEL027062	AGAP002469
OG0001994	2	1	3	AAEL019738, AAEL022521	AGAP002553
OG0001995	2	1	3	AAEL019741, AAEL020108	AGAP029573
OG0001996	2	1	3	AAEL019751, AAEL025022	AGAP011569
OG0001997	2	1	3	AAEL019756, AAEL019790	AGAP011379
OG0001998	2	1	3	AAEL019774, AAEL027200	AGAP011336
[truncated: 7,859 more rows]
