# Supplementary material for: A transcriptomic atlas of Aedes aegypti reveals detailed functional organization of major body parts and gut regional specializations in sugar-fed and blood-fed adult females
Source: eLife. 2022 Apr 26;11:e76132. doi: 10.7554/eLife.76132 (PMC9113746; doi:10.7554/eLife.76132)
Supplement: Supplementary file 9. [file elife-76132-supp9.xlsx]

## Sheet: Sheet1
Species	Part/region/condition	# of replicates	Diet (timepoint)	Minimum # of individuals per replicate
Aedes aegypti	Whole body	3	10% sucrose ad libitem	>10
Aedes aegypti	Head	3	10% sucrose ad libitem	>20
Aedes aegypti	Thorax	3	10% sucrose ad libitem	>10
Aedes aegypti	Abdomen	3	10% sucrose ad libitem	>10
Aedes aegypti	Gut	6	10% sucrose ad libitem	>20
Aedes aegypti	MT	3	10% sucrose ad libitem	>20
Aedes aegypti	Ovaries	3	10% sucrose ad libitem	>20
Aedes aegypti	Crop	4	10% sucrose ad libitem	>200
Aedes aegypti	Proventriculus	3	10% sucrose ad libitem	>200
Aedes aegypti	Anterior midgut	3	10% sucrose ad libitem	>100
Aedes aegypti	Posterior midgut	3	10% sucrose ad libitem	>20
Aedes aegypti	Hindgut	3	10% sucrose ad libitem	>100
Aedes aegypti	BF anterior midgut	3	Chicken blood (24 hr), 10% sucrose ad libitem	>50
Aedes aegypti	BF posterior midgut	3	Chicken blood (24 hr), 10% sucrose ad libitem	>20
Aedes aegypti	6 hr BF guts	3	Chicken blood (4-6 hr), 10% sucrose ad libitem	>20
Aedes aegypti	24 hr BF guts	3	Chicken blood (24 hr), 10% sucrose ad libitem	>20
Aedes aegypti	48 hr BF guts	3	Chicken blood (48 hr), 10% sucrose ad libitem	>20
Anopheles gambiae	Gut	3	10% sucrose ad libitem	>20
Anopheles gambiae	Proventriculus	3	10% sucrose ad libitem	>200
Anopheles gambiae	Anterior midgut	3	10% sucrose ad libitem	>100
Anopheles gambiae	Posterior midgut	3	10% sucrose ad libitem	>20
	27
