# Supplementary material for: A transcriptomic atlas of Aedes aegypti reveals detailed functional organization of major body parts and gut regional specializations in sugar-fed and blood-fed adult females
Source: eLife. 2022 Apr 26;11:e76132. doi: 10.7554/eLife.76132 (PMC9113746; doi:10.7554/eLife.76132)
Supplement: Supplementary file 10. [file elife-76132-supp10.xlsx]

## Sheet: Body Part Primers
Primer Name	Target	Sequence
Body_Ref_elF3i_13144_F	AAEL013144	CCCGTTCTGAAGCTGACCAT
Body_Ref_elF3i_13144_R	AAEL013144	AGACAGCTGCATGTCGTTGA
Head_06451_F	AAEL006451	GTGTTTCCCAAACGGCTGAC
Head_06451_R	AAEL006451	GTTGGTGTCTCCTCAGCGAA
Thorax_05964_F	AAEL005964	ACCGGGTGCATATTAGGTGC
Thorax_05964_R	AAEL005964	AAGGAAATACGGCACGAGGG
Abdomen_01737_F	AAEL001737	AGGCAAGAGGCCTATCCTCA
Abdomen_01737_R	AAEL001737	CGTTTCCGTTCCCTCCTTCA
Gut_08599_F	AAEL008599	TGAAGAGCCAGCAGTTCGAG
Gut_08599_R	AAEL008599	GGTCTGCACCTTGGCATAGT
MTs_01650_F	AAEL001650	TGACTGTGAACGACTGCTCC
MTs_01650_R	AAEL001650	TCCATACCAAGGAAACGGGC
Ovaries_00584_F	AAEL000584	ATGCGACCAGCTACGGTATG
Ovaries_00584_R	AAEL000584	GTTGGTTCAAGCCGTAGGGA

## Sheet: BF Time Series Primers
Primer Name	Target	Sequence
BF_Ref_RpS30_9653F	AAEL009653	CACTGCTGGGAGGTAAGGTG
BF_Ref_RpS30_9653F	AAEL009653	GCGAAGTTGCGGTTGTACTG
01703_F	AAEL001703	AGTTCAAGTGCGGAGGATCG
01703_R	AAEL001703	CTTGGGGTAGTCAGCGTGAG
07818_F	AAEL007818	ATCCTGCGGCCTACACAATC
07818_R	AAEL007818	AAACGGTGCACATAGCTCCA
13715_F	AAEL013715	CGGAGTACGATTCCGCGAC
13715_R	AAEL013715	CGGAAACCTGTAGGCACGAT
01674_F	AAEL001674	AGCTGGCTTTGCCCTATTGT
01674_R	AAEL001674	CAATAGACAATGTGCCGCCG
10782_F	AAEL010782	ACTTTTGGAAACGAAGCCGC
10782_R	AAEL010782	TCCAGCAATCTGACACGGAC
08782_F	AAEL008782	TCTCCTTGGGTGGGGTGTAA
08782_R	AAEL008782	TCCCTACCTGCACTCCGTTA
22646_F	AAEL002264	ATCGCTCTAGTGCGGTTAGC
22646_R	AAEL002264	TGTCCACACTTTCGTCTCCG
